# Supplementary material for: The PI3K/Akt/mTOR Pathway Is Implicated in the Premature Senescence of Primary Human Endothelial Cells Exposed to Chronic Radiation
Source: PLoS One. 2013 Aug 1;8(8):e70024. doi: 10.1371/journal.pone.0070024 (PMC3731291; doi:10.1371/journal.pone.0070024)
Supplement: File S1 — Table S1, Differentially expressed proteins at week 10, 1.4 mGy/h dose rate. The proteins listed in the table were identified and quantified by two or more unique peptides. The proteins shared between the two dose rate exposures are indicated in bold. Table S2, Differentially expressed proteins at week 10 from 2.4 mGy/h dose rate. The proteins listed in the table were identified and quantified by two or more unique peptides. Table S3, All identified proteins in this study. The identified proteins using both dose rates, week 10, are shown. Table S4, All identified peptides in this study. The identified peptides using both dose rates, week 10, are shown. Table S5, Networks obtained from deregulated proteins using Ingenuity Pathway Analysis software. The networks from 1.4 and 2.4 mGy/h dose rate deregulated proteins are listed. Focus molecules represent the number of deregulated proteins in the network. Names written in bold represent up-regulated and italic down-regulated proteins. Unregulated proteins associated with the corresponding network are written with normal letters. Table S6, Biological functions or cellular locations of deregulated proteins. The proteins deregulated at the dose rate of 2.4 mGy/h, week 10, are shown. (XLSX) [file pone.0070024.s001.xlsx]

## Sheet: S1
	Table S1. Differentially expressed proteins at week 10, 1.4 mGy/h dose rate.
	The proteins listed in the table were identified and quantified by two or more unique peptides. The proteins shared between the two dose rate exposures are indicated in bold.
	#	Accession	Symbol	Entrez Gene Name	Unique Peptides	Medium/Light Variability [%]	Medium/Light ratio	p-value	# AAs	MW [kDa]	calc. pI	ΣCoverage
	1	ENSP00000257770	NT5E	5'-nucleotidase, ecto (CD73)	5	22.7835	2.48468	9.60503e-05	434	47.0459	5.43994	36.87
	2	ENSP00000193403	ACTN1	Actinin, alpha 1	14	12.0713	1.32873	0.000281045	522	56.0492	8.77783	15.33
	3	ENSP00000409153	AP1G1	Adaptor-related protein complex 1, gamma 1 subunit	5	20.2503	-1.45522	0.000393353	243	26.6714	9.65674	66.26
	4	ENSP00000273258	ARL6IP5	ADP-ribosylation-like factor 6 interacting protein 5	6	24.682	1.42395	0.000288221	137	15.7377	12.0151	75.91
	5	ENSP00000367263	AHNAK	AHNAK nucleoprotein	16	23.4986	1.3937	0.000277832	664	74.0947	7.02002	81.78
	6	ENSP00000300060	ANPEP	Alanyl (membrane) aminopeptidase	20	13.3535	1.55845	0.00022066	183	20.1225	8.35303	14.21
	7	ENSP00000320324	NPEPPS	Aminopeptidase puromycin sensitive	15	21.459	1.61355	0.000427133	188	21.6004	9.77393	38.3
	8	ENSP00000437593	ATL3	Atlastin GTPase 3	7	25.2024	1.43853	0.000153967	537	59.0215	5.8335	31.1
	9	ENSP00000290299	ATP5O	ATP synthase, H+ transporting, mitochondrial F1 complex, O subunit	6	13.8431	-1.57424	0.000687336	518	60.0134	9.39307	26.25
	10	ENSP00000420366	ATP5F1	ATP synthase, H+ transporting, mitochondrial Fo complex, subunit B1	3	21.2034	-1.50686	0.000482971	379	41.5394	5.56689	23.22
	11	ENSP00000439874	ATP6V1A	ATPase, H+ transporting, lysosomal 70kDa, V1 subunit A	4	4.1568	1.34713	0.0152355	7388	837.787	5.38916	5.27
	12	ENSP00000295006	CAPN2	Calpain 2, (m/II) large subunit	19	24.0224	1.46103	0.000237117	534	60.5887	6.82959	46.63
	13	ENSP00000409997	CRTAP	Cartilage associated protein	6	21.1099	-1.47951	0.000477356	523	58.7356	5.64307	27.15
	14	ENSP00000411226	CTNNB1	Catenin (cadherin-associated protein), beta 1, 88kDa	13	9.36135	1.92429	0.00989867	1609	177.489	5.12256	14.85
	15	ENSP00000309732	CD44	CD44 molecule (Indian blood group)	5	16.9257	2.12525	0.000443432	640	71.1792	5.2876	24.38
	16	ENSP00000355237	CDC42BPB	CDC42 binding protein kinase beta (DMPK-like)	3	19.1455	1.91008	0.000258859	123	14.5426	11.0483	65.04
	17	ENSP00000383191	COL18A1	Collagen, type XVIII, alpha 1	10	29.2065	-1.38957	0.000598704	702	80.4226	6.31592	24.93
	18	ENSP00000326126	CPNE1	Copine I	12	14.7996	-1.38654	0.0131141	358	41.4065	5.87158	13.97
	19	ENSP00000299218	CAND1	Cullin-associated and neddylation-dissociated 1	10	14.504	1.42523	0.000184968	546	59.2347	4.36084	17.22
	20	ENSP00000304072	DDX54	DEAD (Asp-Glu-Ala-Asp) box polypeptide 54	3	25.7372	-1.52176	0.000128527	490	54.2526	7.79639	38.37
	21	ENSP00000427985	DPYSL2	Dihydropyrimidinase-like 2	10	18.2611	1.49116	0.000324844	798	88.357	5.38916	19.8
	22	ENSP00000376193	DNAJC10	DnaJ (Hsp40) homolog, subfamily C, member 10	10	17.2239	-1.40153	8.79001e-05	262	30.1046	8.92432	21.37
	23	ENSP00000320516	EHD1	EH-domain containing 1	14	17.0948	1.56675	0.000128844	213	23.2627	9.96436	55.4
	24	ENSP00000341917	ENG	Endoglin	10	21.8561	1.60691	0.000137822	2012	227.776	6.18896	4.22
	25	ENSP00000428796	EIF3E	Eukaryotic translation initiation factor 3, subunit E	10	29.8171	1.36149	0.000345684	794	89.5398	6.78564	12.22
	26	ENSP00000444931	EIF3F	Eukaryotic translation initiation factor 3, subunit F	4	18.795	1.42148	0.000232218	4547	515.884	5.79541	69.41
	27	ENSP00000385942	XPO1	Exportin 1	4	29.5352	2.22887	6.41961e-05	804	90.5588	5.70654	26.49
	28	ENSP00000378380	FUBP1	Far upstream element (FUSE) binding protein 1	11	6.42689	1.37802	0.0157629	439	48.5042	7.03467	14.58
	29	ENSP00000302873	GPS1	G protein pathway suppressor 1	5	25.174	1.87581	0.000197047	1170	129.3	4.94482	23.93
	30	ENSP00000410833	GBE1	Glucan (1,4-alpha-), branching enzyme 1	11	28.9634	1.39404	0.0137961	1711	194.193	6.3667	2.4
	31	ENSP00000324173	HSPA5	Glucose-regulated protein, 78kDa	15	11.4359	-1.3188	0.000157172	1306	150.26	5.74463	8.04
	32	ENSP00000441274	GLUD1	Glutamate dehydrogenase 1	13	13.3053	1.40037	0.000172533	490	54.6705	6.46826	29.39
	33	ENSP00000405984	GLG1	Golgi glycoprotein 1	19	25.2022	1.39506	0.000326149	160	18.5531	10.4917	90.63
	34	ENSP00000444277	GTPBP4	GTP binding protein 4	9	29.9223	1.43614	0.000140902	452	50.8769	8.68994	31.42
	35	ENSP00000295920	GMPS	Guanine monphosphate synthetase	7	5.55097	2.1026	0.000407912	211	23.0114	7.32764	27.96
	36	ENSP00000312999	GNAI2	Guanine nucleotide binding protein (G protein), polypeptide 2	10	20.3602	1.47152	0.000245572	340	37.2542	5.51611	27.35
	37	ENSP00000433397	HYOU1	Hypoxia up-regulated 1	22	8.27686	-1.40659	0.000217356	92	10.2685	10.4331	29.35
	38	ENSP00000438399	IST1	Increased sodium tolerance 1 homolog	5	26.4331	1.32412	0.000391615	5890	628.699	6.15088	4.4
	39	ENSP00000303351	ITGB1	Integrin, beta 1	10	20.0421	1.40087	0.000129953	1828	212.138	8.60205	5.69
	40	ENSP00000351177	LONP1	Ion peptidase 1, mitochondrial	19	17.0199	1.30531	0.000173657	747	86.0889	7.48877	15.93
	41	ENSP00000391075	IDH1	Isocitrate dehydrogenase 1 (NADP+), soluble	3	4.97853	1.96484	0.000275225	1025	115.657	8.26514	11.41
	42	ENSP00000331897	IDH2	Isocitrate dehydrogenase 2 (NADP+), mitochondrial	8	14.6252	-1.35758	0.000358755	403	45.768	7.78174	60.3
	43	ENSP00000378719	KTN1	Kinectin 1 (kinesin receptor)	9	13.6836	1.56072	0.000406283	700	79.9448	4.98291	49.43
	44	ENSP00000357283	LMNA	Lamin A/C	4	19.056	1.73953	0.000328199	646	71.5626	5.75732	45.2
	45	ENSP00000258341	LAMC1	Laminin, gamma 1 (formerly LAMB2)	16	13.1251	2.45175	0.000110368	1023	115.861	6.85889	26.78
	46	ENSP00000347649	LEPREL4	Leprecan-like 4	4	11.4627	-1.45746	0.000185141	334	38.3621	6.23975	26.05
	47	ENSP00000236040	LEPRE1	Leucine proline-enriched proteoglycan (leprecan) 1	13	10.1804	-1.37752	0.000389785	472	53.3596	7.79639	13.77
	48	ENSP00000390225	HLA-A	Major histocompatibility complex, class I, A	9	10.9501	1.43419	0.00056219	1058	117.774	5.75732	26.47
	49	ENSP00000264036	MCAM	Melanoma cell adhesion molecule	21	20.9034	1.40712	0.000331416	165	18.8859	10.1548	61.21
	50	ENSP00000410503	MBOAT7	Membrane bound O-acyltransferase domain containing 7	6	12.8349	1.62146	0.00692658	368	41.464	5.42725	27.72
	51	ENSP00000362006	MACF1	Microtubule-actin crosslinking factor 1	29	22.0557	1.40231	8.28923e-05	437	50.3492	4.76709	9.38
	52	ENSP00000348693	MYO5A	Myosin VA (heavy chain 12, myoxin)	8	12.3916	1.43077	0.000422331	625	67.4987	6.56592	31.2
	53	ENSP00000257829	NAT10	N-acetyltransferase 10 (GCN5-related)	8	19.8278	-1.36753	0.000566403	511	55.9047	5.17334	21.14
	54	ENSP00000398330	NQO1	NAD(P)H dehydrogenase, quinone 1	3	20.1777	2.81204	0.000105966	892	102.993	5.41455	50.56
	55	ENSP00000368776	NAE1	NEDD8 activating enzyme E1 subunit 1	5	25.7788	1.39769	1.542e-05	418	46.4112	8.68994	46.65
	56	ENSP00000407952	NAMPTL	Nicotinamide phosphoribosyltransferase-like	2	22.8639	1.50793	0.000133821	967	109.471	5.47803	31.13
	57	ENSP00000285968	NUP205	Nucleoporin 205kDa	6	13.5526	1.41913	0.000312231	148	16.551	11.0044	75
	58	ENSP00000357838	OAT	Ornithine aminotransferase	3	25.1243	-1.42224	0.000555022	1067	117.599	7.38623	10.97
	59	ENSP00000222673	OGDH	Oxoglutarate (alpha-ketoglutarate) dehydrogenase (lipoamide)	19	11.9441	1.39502	0.000204014	923	103.04	6.66846	31.64
	60	ENSP00000378355	POR	P450 (cytochrome) oxidoreductase	10	27.7497	1.43517	0.000107351	399	45.8331	7.12256	12.78
	61	ENSP00000348099	PDLIM7	PDZ and LIM domain 7 (enigma)	7	20.6534	1.72122	0.000290053	125	14.4539	10.5356	77.6
	62	ENSP00000391890	PEPD	Peptidase D	6	26.955	1.33338	0.00852623	461	51.2798	5.43994	26.9
	63	ENSP00000300026	PPIB	Peptidylprolyl isomerase B (cyclophilin B)	6	7.11318	-1.51132	9.13851e-05	437	47.8081	5.08447	47.37
	64	ENSP00000221957	PLIN3	Perilipin 3	9	11.3939	1.46744	0.000300345	355	40.4251	5.5415	34.93
	65	ENSP00000348901	PLD3	Phospholipase D family, member 3	7	17.1004	-1.53113	0.000242029	391	43.9056	6.30322	20.46
	66	ENSP00000344848	PLEC	Plectin	3	16.7577	2.09491	0.000347467	136	15.7877	10.5649	82.35
	67	ENSP00000340870	PVR	Poliovirus receptor	5	22.2619	2.45013	5.72944e-05	548	59.6739	9.49561	23.91
	68	ENSP00000307387	PDCD6IP	Programmed cell death 6 interacting protein	12	17.2868	1.4891	0.0160231	881	98.5342	10.0229	11.35
	69	ENSP00000442077	PRCP	Prolylcarboxypeptidase (angiotensinase C)	6	20.4542	-1.46305	0.000528483	151	17.2117	10.5356	70.86
	70	ENSP00000401802	PSMC6	Proteasome (prosome, macropain) 26S subunit, ATPase, 6	17	21.979	-1.32385	0.000555472	1339	135.677	6.46826	9.56
	71	ENSP00000363011	PSMD5	Proteasome (prosome, macropain) 26S subunit, non-ATPase, 5	8	12.5291	1.32066	0.000598019	445	49.875	4.89404	62.02
	72	ENSP00000286091	PDIA4	Protein disulfide isomerase family A, member 4	10	17.3673	-1.54474	8.46738e-05	360	40.3439	5.8335	40
	73	ENSP00000417520	PDIA5	Protein disulfide isomerase family A, member 5	4	12.2506	-1.76564	0.00033259	324	36.1376	9.26123	22.22
	74	ENSP00000438778	PDIA6	Protein disulfide isomerase family A, member 6	14	12.0201	-1.32695	9.80183e-05	299	34.2457	6.7124	49.16
	75	ENSP00000265563	PRKAR2A	Protein kinase, cAMP-dependent, regulatory, type II, alpha	8	27.43	-1.38822	0.000142222	399	44.7036	8.86572	21.55
	76	ENSP00000342778	PPM1G	Protein phosphatase, Mg2+/Mn2+ dependent, 1G	4	15.3237	1.51182	3.203e-05	216	23.7275	9.40771	49.54
	77	ENSP00000264710	RAB10	RAB10, member RAS oncogene family	3	13.9514	1.46344	0.000365082	919	103.211	5.71924	25.24
	78	ENSP00000377642	RAB1B	RAB1B, member RAS oncogene family	2	23.1426	-1.32631	0.000398042	184	20.3612	7.32764	25
	79	ENSP00000265062	RAB7A	RAB7A, member RAS oncogene family	6	24.2123	1.30191	0.000409652	119	13.708	5.07178	24.37
	80	ENSP00000362092	RRAGC	Ras-related GTP binding C	2	23.0832	-1.51693	1.34743e-05	584	64.6948	5.65576	24.32
	81	ENSP00000364585	RCC2	Regulator of chromosome condensation 2	6	18.0279	1.53748	0.000468431	563	61.2096	6.48096	25.58
	82	ENSP00000434883	ARHGAP1	Rho GTPase activating protein 1	5	14.5651	1.58944	0.000196508	645	72.887	5.07178	24.19
	83	ENSP00000346402	RNH1	Ribonuclease/angiogenin inhibitor 1	15	26.5061	1.41753	0.000552968	461	49.9411	4.81787	64.86
	84	ENSP00000351021	RPL21	Ribosomal protein L21	9	21.4567	-1.30138	0.000257817	117	13.2845	11.4731	88.03
	85	ENSP00000378393	RPL23A	Ribosomal protein L23a	4	16.0622	-1.37757	0.000244436	845	94.0795	7.04932	7.46
	86	ENSP00000419179	RPL24	Ribosomal protein L24	7	21.9723	-1.32764	0.00361408	157	17.7083	8.38232	40.13
	87	ENSP00000253788	RPL27	Ribosomal protein L27	11	22.6432	-1.30543	0.000583853	633	71.5988	5.5542	22.91
	88	ENSP00000346015	RPL27A	Ribosomal protein L27a	6	20.8568	-1.33151	0.000565631	429	47.2304	6.07471	21.68
	89	ENSP00000342787	RPL28	Ribosomal protein L28	12	20.4299	-1.32545	0.000716116	1071	123.306	6.06201	5.6
	90	ENSP00000264258	RPL31	Ribosomal protein L31	7	20.1205	-1.30546	3.31882e-05	629	66.1908	7.56201	27.34
	91	ENSP00000412393	RPL32	Ribosomal protein L32	6	17.6136	-1.29971	0.000521735	497	55.6421	7.88428	20.72
	92	ENSP00000378163	RPL34	Ribosomal protein L34	7	19.0818	-1.30769	0.000171924	158	17.9393	10.521	24.05
	93	ENSP00000259469	RPL35	Ribosomal protein L35	5	18.949	-1.39445	0.00677347	774	84.7119	5.92236	30.23
	94	ENSP00000393393	RPL35A	Ribosomal protein L35a	8	19.0262	-1.36027	0.000443483	1179	134.464	6.90283	18.24
	95	ENSP00000418082	RPL37A	Ribosomal protein L37a	2	18.105	-1.4218	0.000322794	195	22.2608	9.26123	14.36
	96	ENSP00000347271	RPS10	Ribosomal protein S10	6	21.879	-1.34527	0.000255087	110	12.5298	11.063	77.27
	97	ENSP00000435777	RPS13	Ribosomal protein S13	11	27.1135	-1.32144	0.000342513	249	26.6527	6.90283	39.76
	98	ENSP00000233609	RPS15	Ribosomal protein S15	4	15.4544	-1.39537	0.000208035	133	15.6067	11.4438	63.91
	99	ENSP00000433821	RPS3	Ribosomal protein S3	15	23.8608	-1.33471	0.000516518	439	48.5185	8.83643	15.03
	100	ENSP00000421464	SEC31A	SEC31 homolog A	9	23.4754	2.04881	0.000479851	574	63.3275	7.03467	15.85
	101	ENSP00000337688	SEC62	SEC62 homolog	4	11.7534	1.54761	0.0040205	594	65.8875	7.47412	18.01
	102	ENSP00000350894	SERPINH1	Serpin peptidase inhibitor, clade H	13	4.95743	-1.34871	0.000364769	202	22.7789	8.49951	10.4
	103	ENSP00000269886	SH3GL1	SH3-domain GRB2-like 1	7	9.74398	1.65582	0.000594316	404	45.49	5.07178	36.14
	104	ENSP00000295702	SSR2	Signal sequence receptor, beta (translocon-associated protein beta)	3	17.7809	-1.43564	4.31942e-05	937	104.713	5.71924	29.88
	105	ENSP00000263694	SNRNP40	Small nuclear ribonucleoprotein 40kDa (U5)	5	19.7901	-1.42732	0.0206632	352	41.3307	6.55127	47.44
	106	ENSP00000449166	SLC25A3	Solute carrier family 25, member 3	4	20.4429	1.50455	0.000482137	491	55.5012	6.7417	13.85
	107	ENSP00000407516	SLC3A2	Solute carrier family 3, member 2	7	28.4591	1.48558	0.000242487	868	95.9631	6.52197	19.47
	108	ENSP00000361816	SPTAN1	Spectrin, alpha, non-erythrocytic 1	4	14.9858	1.45397	8.31674e-05	654	72.2884	5.16064	36.85
	109	ENSP00000227503	SF1	Splicing factor 1	8	8.28669	1.54227	0.000163017	1230	136.289	5.78271	10.98
	110	ENSP00000445764	STOM	Stomatin	9	20.8471	1.80262	0.0123446	357	39.2857	8.104	27.17
	111	ENSP00000247020	SDF2	Stromal cell-derived factor 2	4	27.3818	-1.62594	0.00165097	533	60.7554	7.6499	15.76
	112	ENSP00000376472	STT3A	STT3, subunit of the oligosaccharyltransferase complex	4	21.0103	-1.55127	0.0156218	435	49.7735	7.1958	9.2
	113	ENSP00000443895	STXBP1	Syntaxin binding protein 1	3	24.8911	-1.41105	0.000365053	121	14.3598	11.312	59.5
	114	ENSP00000304467	THOP1	Thimet oligopeptidase 1	2	18.6329	1.71711	0.000141256	200	22.5266	8.38232	18.5
	115	ENSP00000442453	TXNDC5	Thioredoxin domain containing 5 (endoplasmic reticulum)	11	11.6441	-1.61676	0.000313611	307	33.219	5.59229	21.5
	116	ENSP00000260356	THBS1	Thrombospondin 1	20	18.3808	-1.66819	0.000407564	237	25.9478	7.38623	65.4
	117	ENSP00000392282	THUMPD1	THUMP domain containing 1	4	22.9626	1.69937	0.000436834	207	23.4748	6.69775	54.11
	118	ENSP00000379933	TPI1	Triosephosphate isomerase 1	4	21.0956	1.35692	0.000405344	1066	116.649	6.0874	61.63
	119	ENSP00000299427	TPP1	Tripeptidyl peptidase I	8	25.8012	1.40166	0.000405762	457	49.8126	8.41162	25.82
	120	ENSP00000280591	TRNT1	tRNA nucleotidyl transferase, CCA-adding, 1	3	7.77631	1.31374	0.000422821	835	93.2484	5.08447	23.35
	121	ENSP00000369703	TUBB2A	Tubulin, beta 2A class IIa	3	25.1616	1.43101	0.000425471	364	39.2797	6.21436	19.51
	122	ENSP00000373883	USP5	Ubiquitin specific peptidase 5 (isopeptidase T)	15	24.4455	1.30342	0.00031729	705	80.4768	8.07471	9.08
	123	ENSP00000338413	UBA1	Ubiquitin-like modifier activating enzyme 1	15	27.8092	1.35874	0.000187722	2472	284.364	5.35107	52.18
	124	ENSP00000246548	UBA2	Ubiquitin-like modifier activating enzyme 2	9	22.8664	1.31616	2.21729e-05	606	66.1519	6.65381	31.02
	125	ENSP00000377939	UGP2	UDP-glucose pyrophosphorylase 2	6	27.1095	1.32083	0.000468655	528	59.383	5.23682	15.91
	126	ENSP00000445017	GALNT2	UDP-N-acetyl-alpha-D-galactosamine:polypeptide N-acetylgalactosaminyltransferase 2	4	2.23032	2.25527	0.000155371	145	17.0292	10.3892	33.79
	127	ENSP00000358283	UFL1	UFM1-specific ligase 1	8	20.8027	1.33578	0.014362	399	44.1958	5.09717	6.77
	128	ENSP00000361841	VCL	Vinculin	38	23.49	1.48772	0.0132232	689	78.7895	6.04932	3.34
	129	ENSP00000390129	VDAC1	Voltage-dependent anion channel 1	2	24.8412	-1.42618	0.000252447	536	58.1264	6.15088	39.93
	130	ENSP00000371890	WDR1	WD repeat domain 1	10	5.19192	1.61024	0.00530222	414	47.7989	8.48486	10.14

## Sheet: S2
	Table S2. Differentially expressed proteins at week 10 from 2.4 mGy/h dose rate.
	The proteins listed in the table were identified and quantified by two or more unique peptides.
	#	Accession	Symbol	Entrez Gene Name	Σ# Unique Peptides	Heavy/Light Variability [%]	Heavy/Light ratio	p-value	# AAs	MW [kDa]	calc. pI	ΣCoverage
	1	ENSP00000219481	DECR2	2,4-dienoyl CoA reductase 2, peroxisomal	4	17.0241	1.52807	0.0118451	292	30.758	9.21729	15.07
	2	ENSP00000259318	AKAP2	A kinase (PRKA) anchor protein 2	6	21.4087	1.79727	0.0154358	859	94.6028	5.10986	9.78
	3	ENSP00000417864	ANP32A	Acidic (leucine-rich) nuclear phosphoprotein 32 family	2	9.77081	1.79809	0.0069805	249	28.5683	4.09424	14.06
	4	ENSP00000228825	ARPC3	Actin related protein 2/3 complex, subunit 3, 21kDa	3	11.6234	-1.40764	0.00722543	178	20.5334	8.5874	24.72
	5	ENSP00000193403	ACTN1	Actinin, alpha 1	14	19.4141	1.67112	0.000349707	892	102.993	5.41455	50.56
	6	ENSP00000293217	ACOX1	Acyl-CoA oxidase 1, palmitoyl	10	1.66688	1.61324	0.00111791	660	74.6201	7.62061	32.27
	7	ENSP00000409153	AP1G1	Adaptor-related protein complex 1, gamma 1 subunit	5	17.8289	-1.98259	0.000175301	845	94.0795	7.04932	7.46
	8	ENSP00000217456	APMAP	Adipocyte plasma membrane associated protein	13	19.7701	-1.30962	0.000232529	416	46.4509	6.16357	47.12
	9	ENSP00000300060	ANPEP	Alanyl (membrane) aminopeptidase	20	26.8078	1.3822	0.000506467	967	109.471	5.47803	31.13
	10	ENSP00000442988	ALDH4A1	Aldehyde dehydrogenase 4 family, member A1	5	2.5062	1.44604	0.00176017	503	55.0829	6.80029	12.72
	11	ENSP00000223029	AIMP2	Aminoacyl tRNA synthetase complex-interacting protein	4	24.8884	-1.7229	0.0152106	320	35.3263	8.22119	17.19
	12	ENSP00000320324	NPEPPS	Aminopeptidase puromycin sensitive	15	29.3224	1.85724	0.000743997	919	103.211	5.71924	25.24
	13	ENSP00000264908	ANXA3	Annexin A3	6	0.694477	-1.31687	0.000437602	323	36.3527	5.92236	28.79
	14	ENSP00000216714	APEX1	APEX nuclease (multifunctional DNA repair enzyme) 1	9	26.1188	1.64432	0.000660394	318	35.5322	8.11865	35.53
	15	ENSP00000264161	DARS	Aspartyl-tRNA synthetase	6	14.5754	-1.55115	0.00897706	501	57.1	6.55127	16.97
	16	ENSP00000286371	ATP1B3	ATPase, Na+/K+ transporting, beta 3 polypeptide	2	3.12577	1.33735	0.00212421	279	31.4921	8.35303	6.81
	17	ENSP00000434824	BTF3L4	Basic transcription factor 3-like 4	3	13.8613	-1.65774	0.00845155	78	8.92693	10.9165	20.51
	18	ENSP00000340858	B2M	Beta-2-microglobulin	2	1.77358	-1.37959	0.00111715	119	13.7059	6.52197	21.01
	19	ENSP00000263368	BLVRB	Biliverdin reductase B (flavin reductase (NADPH))	3	10.0758	1.57303	0.00707652	206	22.1054	7.6499	22.33
	20	ENSP00000440817	BCAT1	Branched chain amino-acid transaminase 1, cytosolic	3	20.3328	-1.30885	0.000287357	385	42.8104	5.22412	8.31
	21	ENSP00000383941	BUB3	Budding uninhibited by benzimidazoles 3 homolog	7	25.1236	1.3391	0.000543715	278	31.6837	8.1626	28.06
	22	ENSP00000356652	CACYBP	Calcyclin binding protein	2	20.1136	-1.85842	0.0121335	228	26.1936	8.25049	12.72
	23	ENSP00000393621	CALD1	Caldesmon 1	6	20.6071	-1.43504	0.0128643	532	61.1762	6.7124	22.74
	24	ENSP00000320866	CALR	Calreticulin	2	3.24544	-1.37057	6.88023e-06	417	48.1118	4.43701	11.27
	25	ENSP00000420381	CALU	Calumenin	5	3.43805	-2.02888	0.00201934	323	38.027	4.62744	34.06
	26	ENSP00000411226	CTNNB1	Catenin (cadherin-associated protein), beta 1, 88kDa	13	16.5378	2.30122	0.0122488	774	84.7119	5.92236	30.23
	27	ENSP00000217131	CTSZ	Cathepsin Z	8	15.0623	1.35881	0.000190327	303	33.8462	7.10791	36.63
	28	ENSP00000309732	CD44	CD44 molecule (Indian blood group)	5	12.6361	1.4182	0.000115828	340	37.2542	5.51611	27.35
	29	ENSP00000431373	CAPRIN1	Cell cycle associated protein 1	5	6.70859	-1.34815	0.00419801	186	20.2234	7.40088	46.24
	30	ENSP00000336687	CBX3	Chromobox homolog 3	3	8.45526	-1.67255	0.005134	183	20.7984	5.32568	19.67
	31	ENSP00000343134	COPE	Coatomer protein complex, subunit epsilon	9	1.12994	-1.5644	0.000691551	256	28.7546	5.2876	48.83
	32	ENSP00000325002	COPG1	Coatomer protein complex, subunit gamma 1	17	25.2909	-1.30395	0.000485763	874	97.6555	5.46533	31.24
	33	ENSP00000262570	CHCHD3	Coiled-coil-helix-coiled-coil-helix domain containing 3	9	3.8939	-1.46468	0.00241597	227	26.1362	8.27979	40.53
	34	ENSP00000326126	CPNE1	Copine I	12	20.2742	-1.61956	0.000290044	537	59.0215	5.8335	31.1
	35	ENSP00000437723	CRIP2	Cysteine-rich protein 2	3	7.02292	1.51619	0.00483762	192	20.6971	8.93896	30.21
	36	ENSP00000301764	DDB1	Damage-specific DNA binding protein 1, 127kDa	9	24.2645	1.52781	0.0170814	1140	126.887	5.26221	11.75
	37	ENSP00000335465	DLST	Dihydrolipoamide S-succinyltransferase	7	1.68259	1.43937	2.13925e-06	367	39.5279	9.5542	23.43
	38	ENSP00000436941	DPP3	Dipeptidyl-peptidase 3	11	26.1047	1.42536	0.0181848	707	79.2582	5.03369	19.09
	39	ENSP00000376193	DNAJC10	DnaJ (Hsp40) homolog, subfamily C, member 10	10	8.63302	-1.32484	4.96649e-05	747	86.0889	7.48877	15.93
	40	ENSP00000365991	DNAJC3	DnaJ (Hsp40) homolog, subfamily C, member 3	10	16.5021	-1.4457	0.000182002	504	57.5442	6.15088	28.17
	41	ENSP00000266479	DNM1L	Dynamin 1-like	6	19.4441	1.73023	0.000287351	575	64.137	7.89893	14.26
	42	ENSP00000263277	EHD2	EH-domain containing 2	15	24.5663	-1.4142	0.000398315	543	61.1227	6.45557	40.7
	43	ENSP00000267950	ETFA	Electron-transfer-flavoprotein, alpha polypeptide	2	0.975591	1.60062	0.000712678	333	35.0576	8.38232	17.12
	44	ENSP00000346173	ETFB	Electron-transfer-flavoprotein, beta polypeptide	5	0.0851634	1.51253	7.40961e-05	346	37.411	7.1665	17.05
	45	ENSP00000341917	ENG	Endoglin	10	6.58632	1.5134	3.54993e-05	625	67.4987	6.56592	31.2
	46	ENSP00000262455	ERP44	Endoplasmic reticulum protein 44	12	9.83583	-1.32753	6.63541e-05	406	46.9414	5.26221	49.26
	47	ENSP00000364345	EMC1	ER membrane protein complex subunit 1	7	19.7814	-1.34639	0.0124663	992	111.561	7.66455	10.38
	48	ENSP00000379042	ERO1L	ERO1-like (S. cerevisiae)	6	23.1614	-1.5313	0.000303378	468	54.3581	5.68115	14.1
	49	ENSP00000433611	EEF1D	Eukaryotic translation elongation factor 1 delta	11	0.56875	-2.24942	0.000330088	261	28.8036	5.021	59
	50	ENSP00000253108	EIF3G	Eukaryotic translation initiation factor 3, subunit G	3	14.905	-1.63274	0.00910354	320	35.5889	6.12549	10.31
	51	ENSP00000362688	EIF3I	Eukaryotic translation initiation factor 3, subunit I	6	12.8973	-1.6745	0.00783605	325	36.4786	5.64307	33.54
	52	ENSP00000425561	EIF4E	Eukaryotic translation initiation factor 4E	3	12.0667	-1.36269	0.00756431	248	28.7596	6.41748	12.5
	53	ENSP00000289371	EIF5B	Eukaryotic translation initiation factor 5B	9	18.9845	-1.32763	0.000239226	1220	138.742	5.49072	13.03
	54	ENSP00000385942	XPO1	Exportin 1 (CRM1 homolog, yeast)	4	26.4135	1.63925	0.000514144	1071	123.306	6.06201	5.6
	55	ENSP00000260385	FAM82A2	Family with sequence similarity 82, member A2	6	23.9805	1.51969	0.0168971	470	52.086	5.09717	13.19
	56	ENSP00000303412	FAM98B	Family with sequence similarity 98, member B	6	29.0839	1.41589	0.000756376	330	37.167	6.29053	22.12
	57	ENSP00000318177	FUBP3	Far upstream element (FUSE) binding protein 3	12	0.452	1.74128	0.000349177	572	61.6022	8.38232	37.24
	58	ENSP00000349078	FDPS	Farnesyl diphosphate synthase	6	21.8433	-2.01179	0.0130596	419	48.2446	6.15088	15.51
	59	ENSP00000350534	FN1	Fibronectin 1	34	26.38	2.21378	0.000570626	2176	239.476	5.88428	23.02
	60	ENSP00000371143	FKBP1A	FK506 binding protein 1A, 12kDa	3	0.989114	1.69045	0.000758828	103	11.4168	9.11475	49.51
	61	ENSP00000324573	FLII	Flightless I homolog	17	27.867	-1.3019	0.000582627	1269	144.66	6.04932	19.15
	62	ENSP00000396673	FTSJ3	FtsJ homolog 3	12	7.20891	1.38027	4.05327e-05	847	96.4992	8.39697	16.65
	63	ENSP00000302873	GPS1	G protein pathway suppressor 1	5	6.04925	1.57013	2.95752e-05	491	55.5012	6.7417	13.85
	64	ENSP00000367195	GLIPR2	GLI pathogenesis-related 2	2	3.47012	-1.76534	0.00209857	128	14.2041	9.51025	17.97
	65	ENSP00000305692	GAA	Glucosidase, alpha; acid	6	10.3207	2.18676	0.00762641	952	105.257	5.99854	8.19
	66	ENSP00000407375	GPX1	Glutathione peroxidase 1	4	10.2684	2.58173	0.00774685	203	22.0751	6.55127	39.41
	67	ENSP00000386944	GSTK1	Glutathione S-transferase kappa 1	3	16.7041	-2.41023	0.00970151	214	24.1697	9.18799	26.17
	68	ENSP00000381604	GSTP1	Glutathione S-transferase pi 1	2	19.3307	2.51398	0.000319361	174	19.468	5.97314	25.29
	69	ENSP00000313432	GRHPR	Glyoxylate reductase/hydroxypyruvate reductase	7	1.32138	1.40448	0.000952979	328	35.6457	7.38623	21.65
	70	ENSP00000393295	GRPEL1	GrpE-like 1, mitochondrial	2	0.263909	-1.51843	0.000143073	196	21.8866	8.6167	11.22
	71	ENSP00000444277	GTPBP4	GTP binding protein 4	9	20.3553	1.53293	0.000364068	518	60.0134	9.39307	26.25
	72	ENSP00000255945	GIMAP4	GTPase, IMAP family member 4	8	3.60465	1.4501	0.00247278	329	37.5104	7.81104	42.86
	73	ENSP00000426101	GNB2L1	Guanine nucleotide binding protein, beta polypeptide 2-like 1	3	20.8206	-1.37553	0.000322327	233	25.8531	9.14404	50.64
	74	ENSP00000308405	H2AFV	H2A histone family, member V	2	17.6965	-1.361	0.000186502	128	13.5005	10.5796	86.72
	75	ENSP00000296417	H2AFZ	H2A histone family, member Z	2	14.0955	-1.7437	0.00852138	128	13.5446	10.5796	59.38
	76	ENSP00000233893	HSPE1	Heat shock 10kDa protein 1 (chaperonin 10)	2	5.09315	-1.36871	0.00319037	102	10.9249	8.92432	22.55
	77	ENSP00000445221	HSPA4	Heat shock 70kDa protein 4	6	23.9188	1.33439	0.000470673	473	52.2248	8.1626	30.23
	78	ENSP00000324173	HSPA5	Heat shock 70kDa protein 5	15	14.0368	-1.32655	0.000136662	654	72.2884	5.16064	36.85
	79	ENSP00000216281	HSP90AA1	Heat shock protein 90kDa alpha (cytosolic)	17	26.6482	1.39695	0.000651437	732	84.6067	5.021	43.17
	80	ENSP00000299767	HSP90B1	Heat shock protein 90kDa beta (Grp94), member 1	25	8.30619	-1.33557	4.65797e-05	803	92.4113	4.84326	51.81
	81	ENSP00000216117	HMOX1	Heme oxygenase (decycling) 1	6	21.4898	-1.45571	0.0133898	288	32.798	8.25049	29.51
	82	ENSP00000363827	HSPG2	Heparan sulfate proteoglycan 2	70	29.0594	-1.51269	0.0181793	4391	468.532	6.50732	24.96
	83	ENSP00000301284	HDGFRP2	Hepatoma-derived growth factor-related protein 2	5	2.42541	1.51939	0.00164023	676	74.7715	6.94678	12.72
	84	ENSP00000348093	HNRNPAB	Heterogeneous nuclear ribonucleoprotein A/B	3	0.986084	-1.31123	0.000608833	285	30.5691	7.91357	23.51
	85	ENSP00000410465	HMGB1	High mobility group box 1	3	0.286814	1.65662	0.000247131	97	11.3448	9.89111	89.69
	86	ENSP00000307705	HIST1H1E	Histone cluster 1, H1e	3	0.85981	-1.39512	0.000535525	219	21.852	11.0337	24.66
	87	ENSP00000343471	IKBIP	IKBKB interacting protein	6	2.12829	-1.35835	0.00133178	350	39.285	9.17334	37.43
	88	ENSP00000438399	IST1	Increased sodium tolerance 1 homolog (yeast)	5	13.2604	1.39901	0.000145772	379	41.5394	5.56689	23.22
	89	ENSP00000364042	ITGAV	Integrin, alpha V precursor	11	7.97034	1.85248	5.34716e-05	1012	112.187	5.93506	17.59
	90	ENSP00000407801	ITGB3	Integrin, beta 3 (platelet glycoprotein IIIa, antigen CD61)	6	3.30076	2.90173	1.028e-05	751	83.5316	5.05908	17.31
	91	ENSP00000415283	ICAM2	Intercellular adhesion molecule 2	5	9.47787	2.18201	0.00692323	275	30.6346	7.43018	19.27
	92	ENSP00000290158	KPNB1	Karyopherin (importin) beta 1	8	29.9363	1.33953	0.000680467	876	97.108	4.77979	17.47
	93	ENSP00000201886	KHSRP	KH-type splicing regulatory protein	16	11.6887	1.40962	0.00801804	710	72.8513	7.89893	37.46
	94	ENSP00000378719	KTN1	Kinectin 1 (kinesin receptor)	9	10.3707	1.32175	8.55676e-05	1306	150.26	5.74463	8.04
	95	ENSP00000222399	LAMB1	Laminin, beta 1	13	6.92261	1.56459	0.0047855	1786	197.909	4.94482	11.2
	96	ENSP00000258341	LAMC1	Laminin, gamma 1 (formerly LAMB2)	16	26.444	1.50162	0.0185851	1609	177.489	5.12256	14.85
	97	ENSP00000313705	LUZP1	Leucine zipper protein 1	3	23.9887	1.38358	0.0165902	1026	114.518	8.88037	8.28
	98	ENSP00000305653	LETM1	Leucine zipper-EF-hand containing transmembrane protein 1	7	6.44124	1.38593	3.08025e-05	739	83.302	6.69775	8.39
	99	ENSP00000363638	LYPLA2	Lysophospholipase II	2	10.4665	1.38704	0.00712684	231	24.7207	7.2251	18.61
	100	ENSP00000321070	ME2	Malic enzyme 2, NAD(+)-dependent, mitochondrial	12	8.21664	1.38676	5.01503e-05	584	65.4018	7.60596	45.89
	101	ENSP00000410503	MBOAT7	Membrane bound O-acyltransferase domain containing 7	6	14.5735	1.92584	0.000172056	399	44.7036	8.86572	21.55
	102	ENSP00000325425	MAT2B	Methionine adenosyltransferase II, beta	6	9.05592	1.33226	6.24472e-05	334	37.5282	7.35693	26.35
	103	ENSP00000296755	MAP1B	Microtubule-associated protein 1B	9	4.92354	-2.24738	0.00288257	2468	270.468	4.80518	6.04
	104	ENSP00000308275	MRPL38	Mitochondrial ribosomal protein L38	6	0.689852	-1.49987	0.00040623	380	44.5684	7.53271	22.11
	105	ENSP00000377334	MRPL4	Mitochondrial ribosomal protein L4	4	13.0645	-1.86318	0.00783193	263	29.4835	10.1255	22.81
	106	ENSP00000269243	MYH10	Myosin, heavy chain 10, non-muscle	23	10.7704	2.07317	0.000108278	1976	228.858	5.5415	19.03
	107	ENSP00000217652	MYL12A	Myosin, light chain 12A, regulatory, non-sarcomeric	3	16.7116	-1.37085	0.0104722	171	19.7815	4.80518	18.13
	108	ENSP00000210444	NANS	N-acetylneuraminic acid synthase	5	6.28682	1.91481	0.00448607	359	40.2815	6.7417	30.36
	109	ENSP00000398330	NQO1	NAD(P)H dehydrogenase, quinone 1	3	10.2528	5.81559	0.000136573	202	22.7789	8.49951	10.4
	110	ENSP00000418354	NDUFB5	NADH dehydrogenase (ubiquinone) 1 beta subcomplex, 5	2	5.71835	1.55587	0.00398366	206	23.5294	9.59814	10.19
	111	ENSP00000397760	NDUFS1	NADH dehydrogenase (ubiquinone) Fe-S protein 1	15	3.81968	1.30938	1.06415e-05	670	73.4804	5.87158	30.75
	112	ENSP00000368776	NAE1	NEDD8 activating enzyme E1 subunit 1	5	16.3386	1.34903	0.000227382	528	59.383	5.23682	15.91
	113	ENSP00000381293	NSF	N-ethylmaleimide-sensitive factor	6	10.5302	1.35405	8.46379e-05	744	82.5421	6.94678	12.23
	114	ENSP00000263354	NAPA	N-ethylmaleimide-sensitive factor attachment protein, alpha	5	22.9271	-1.54267	0.0141981	295	33.2113	5.36377	31.86
	115	ENSP00000264663	NNT	Nicotinamide nucleotide transhydrogenase	3	10.315	1.82024	0.00736891	1086	113.823	8.08936	5.25
	116	ENSP00000216121	NIPSNAP1	Nipsnap homolog 1	6	3.67945	-1.34528	0.00230015	284	33.2888	9.30518	22.18
	117	ENSP00000363899	NIPSNAP3A	Nipsnap homolog 3A	7	12.1219	1.65005	0.00855183	247	28.4485	9.15869	37.65
	118	ENSP00000365572	NME2	NME/NM23 nucleoside diphosphate kinase 2	6	27.6684	1.63156	0.000693102	267	30.1176	8.92432	43.45
	119	ENSP00000420957	NSUN2	NOP2/Sun RNA methyltransferase family, member 2	6	17.8645	1.72544	0.000298888	732	82.3407	7.00537	12.43
	120	ENSP00000356110	NUCKS1	Nuclear casein kinase and cyclin-dependent kinase substrate 1	2	5.19835	2.57756	0.00385557	243	27.28	5.08447	8.23
	121	ENSP00000285968	NUP205	Nucleoporin 205kDa	6	20.5363	1.31073	0.000333399	2012	227.776	6.18896	4.22
	122	ENSP00000376233	OPA1	Optic atrophy 1 (autosomal dominant)	8	7.47459	1.33302	4.14369e-05	960	111.561	7.86963	8.75
	123	ENSP00000222673	OGDH	Oxoglutarate (alpha-ketoglutarate) dehydrogenase (lipoamide)	19	3.08605	1.31496	7.23787e-06	1023	115.861	6.85889	26.78
	124	ENSP00000378355	POR	P450 (cytochrome) oxidoreductase	10	16.7548	1.55444	0.000210315	633	71.5988	5.5542	22.91
	125	ENSP00000343966	PSPC1	Paraspeckle component 1	12	12.0326	1.65783	0.0085099	523	58.7062	6.66846	26
	126	ENSP00000422528	PDLIM5	PDZ and LIM domain 5	3	15.063	-1.37981	0.00942221	231	24.9653	8.6167	16.45
	127	ENSP00000348099	PDLIM7	PDZ and LIM domain 7	7	5.93371	1.4606	2.70629e-05	457	49.8126	8.41162	25.82
	128	ENSP00000391890	PEPD	Peptidase D	6	13.2854	1.9469	0.000142132	429	47.2304	6.07471	21.68
	129	ENSP00000300026	PPIB	Peptidylprolyl isomerase B (cyclophilin B)	6	6.6332	-1.47527	2.83686e-05	216	23.7275	9.40771	49.54
	130	ENSP00000349432	PRDX3	Peroxiredoxin 3	4	7.20137	1.46341	4.23459e-05	238	25.8223	7.45947	27.73
	131	ENSP00000261313	PEBP1	Phosphatidylethanolamine binding protein 1	5	5.39838	1.55591	0.00375694	187	21.0437	7.53271	36.9
	132	ENSP00000371393	PGM2	Phosphoglucomutase 2	7	24.2984	2.02957	0.000488444	612	68.2404	6.72705	12.91
	133	ENSP00000321503	PGAM5	Phosphoglycerate mutase family member 5	9	6.37442	-1.38392	0.00394618	255	28.0025	7.25439	36.47
	134	ENSP00000443463	PLBD2	Phospholipase B domain containing 2	4	17.2875	1.63251	0.0121386	557	61.8452	6.80029	7.72
	135	ENSP00000348901	PLD3	Phospholipase D family, member 3	7	8.89999	-1.65594	5.0776e-05	490	54.6705	6.46826	29.39
	136	ENSP00000370377	PITRM1	Pitrilysin metallopeptidase 1	13	1.74061	1.41771	2.19742e-06	1038	117.437	6.91748	23.31
	137	ENSP00000340870	PVR	Poliovirus receptor	5	15.4014	3.57526	0.000276377	364	39.2797	6.21436	19.51
	138	ENSP00000350313	PTRF	Polymerase I and transcript release factor	17	11.3449	-1.36361	8.57029e-05	345	39.0216	6.50732	57.1
	139	ENSP00000349391	POTEE/POTEF	POTE ankyrin domain family, member F	3	16.7876	1.48151	0.0116477	1075	121.286	6.20166	12.47
	140	ENSP00000225655	PFN1	Profilin 1	2	2.88734	1.39187	6.6048e-06	140	15.0446	8.26514	23.57
	141	ENSP00000386541	PSMD14	Proteasome (prosome, macropain) 26S subunit, non-ATPase	3	0.800419	-1.43506	0.000488281	310	34.5546	6.52197	16.45
	142	ENSP00000441682	PSME3	Proteasome activator subunit 3 (PA28 gamma; Ki)	6	10.1809	1.29993	8.33991e-05	193	22.4408	6.80029	41.45
	143	ENSP00000390491	PSMA3	Proteasome (prosome, macropain) subunit, alpha type, 3	5	8.40919	-1.30715	0.00530225	248	27.6297	5.32568	24.6
	144	ENSP00000300289	PDIA3	Protein disulfide isomerase family A, member 3	10	1.84853	-1.34752	2.21226e-06	505	56.7468	6.354	55.25
	145	ENSP00000286091	PDIA4	Protein disulfide isomerase family A, member 4	10	8.16536	-2.21306	3.91021e-05	645	72.887	5.07178	24.19
	146	ENSP00000417520	PDIA5	Protein disulfide isomerase family A, member 5	4	8.77749	-1.42107	5.00236e-05	262	30.1046	8.92432	21.37
	147	ENSP00000438778	PDIA6	Protein disulfide isomerase family A, member 6	14	8.33607	-1.44331	4.47354e-05	437	47.8081	5.08447	47.37
	148	ENSP00000342778	PPM1G	Protein phosphatase, Mg2+/Mn2+ dependent, 1G	4	23.8434	2.11815	0.000523049	546	59.2347	4.36084	17.22
	149	ENSP00000360683	PTPN1	Protein tyrosine phosphatase, non-receptor type 1	8	29.0107	1.32727	0.0200458	435	49.9348	6.26514	24.37
	150	ENSP00000343943	PPOX	Protoporphyrinogen oxidase	10	1.90234	1.30619	0.00131507	477	50.7337	8.1626	26.42
	151	ENSP00000354532	PNP	Purine nucleoside phosphorylase	10	20.3447	1.39289	0.000365266	289	32.0972	6.94678	43.25
	152	ENSP00000379051	PURB	Purine-rich element binding protein B	3	23.0912	-1.48361	0.0144045	312	33.2205	5.42725	8.97
	153	ENSP00000342502	PYCR2	Pyrroline-5-carboxylate reductase family, member 2	2	3.11801	-1.34164	0.00194434	320	33.6157	7.76709	13.44
	154	ENSP00000389404	PDHX	Pyruvate dehydrogenase complex, component X	3	24.4257	1.33714	0.000548526	486	51.4282	6.34131	11.11
	155	ENSP00000362946	RAB14	RAB14, member RAS oncogene family	3	14.5261	1.51516	0.0101464	215	23.8819	6.21436	20.93
	156	ENSP00000265062	RAB7A	RAB7A, member RAS oncogene family	6	30.414	1.47	0.000650859	207	23.4748	6.69775	54.11
	157	ENSP00000283195	RANBP2	RAN binding protein 2	3	9.09892	1.72069	0.00646029	3224	357.974	6.20166	2.95
	158	ENSP00000272233	RHOB	Ras homolog family member B	4	2.87771	1.58644	0.00195816	196	22.1091	5.23682	19.9
	159	ENSP00000362092	RRAGC	Ras-related GTP binding C	2	9.69159	-1.52757	0.0059516	399	44.1958	5.09717	6.77
	160	ENSP00000364585	RCC2	Regulator of chromosome condensation 2	6	16.4211	1.83466	0.000252183	522	56.0492	8.77783	15.33
	161	ENSP00000054950	RCN1	Reticulocalbin 1, EF-hand calcium binding domain	7	12.3717	-1.51513	9.91457e-05	331	38.8662	4.99561	23.56
	162	ENSP00000346402	RNH1	Ribonuclease/angiogenin inhibitor 1	15	15.2851	1.32232	0.000188941	461	49.9411	4.81787	64.86
	163	ENSP00000341730	RPL10	Ribosomal protein L10	16	19.7767	-1.545	0.000271049	214	24.5879	10.0815	85.51
	164	ENSP00000363018	RPL10A	Ribosomal protein L10a	4	16.9911	-1.86084	0.000157169	217	24.8155	9.93506	19.35
	165	ENSP00000363676	RPL11	Ribosomal protein L11	11	19.2074	-1.50685	0.000257988	178	20.2396	9.59814	60.67
	166	ENSP00000307889	RPL13	Ribosomal protein L13	15	20.5801	-1.5321	0.00029613	211	24.2465	11.6489	81.52
	167	ENSP00000375730	RPL13A	Ribosomal protein L13a	14	20.196	-1.5274	0.000285418	203	23.5624	10.9312	79.8
	168	ENSP00000443391	RPL14	Ribosomal protein L14	10	21.9867	-1.43191	0.000345708	128	15.073	10.7261	87.5
	169	ENSP00000309334	RPL15	Ribosomal protein L15	13	19.7382	-1.49463	0.000271397	204	24.1311	11.6196	58.33
	170	ENSP00000397798	RPL17	Ribosomal protein L17	6	19.4077	-1.50722	0.000265773	184	21.3833	10.1694	36.41
	171	ENSP00000084795	RPL18	Ribosomal protein L18	12	20.2572	-1.50469	0.000285086	190	21.8251	11.7222	71.58
	172	ENSP00000222247	RPL18A	Ribosomal protein L18a	11	20.6629	-1.57083	0.000295877	176	20.7489	10.7114	67.61
	173	ENSP00000225430	RPL19	Ribosomal protein L19	15	19.7165	-1.44591	0.000270334	196	23.4512	11.4731	67.35
	174	ENSP00000351021	RPL21	Ribosomal protein L21	9	20.3216	-1.47168	0.000291192	160	18.5531	10.4917	90.63
	175	ENSP00000346088	RPL22	Ribosomal protein L22	3	15.0968	-1.34998	0.000159567	128	14.7778	9.18799	52.34
	176	ENSP00000367336	RPL23	Ribosomal protein L23	5	24.6521	-1.43802	0.000454739	91	9.66339	11.4878	84.62
	177	ENSP00000378393	RPL23A	Ribosomal protein L23a	4	18.0094	-1.53568	0.000228354	158	17.9393	10.521	24.05
	178	ENSP00000419179	RPL24	Ribosomal protein L24	7	20.3131	-1.63213	0.000290624	121	14.3598	11.312	59.5
	179	ENSP00000293842	RPL26	Ribosomal protein L26	3	1.86325	-2.04439	0.00110328	145	17.2475	10.5503	71.03
	180	ENSP00000253788	RPL27	Ribosomal protein L27	11	20.319	-1.52425	0.000287566	136	15.7877	10.5649	82.35
	181	ENSP00000346015	RPL27A	Ribosomal protein L27a	6	21.1867	-1.59907	0.000301535	148	16.551	11.0044	75
	182	ENSP00000342787	RPL28	Ribosomal protein L28	12	20.3273	-1.59455	0.000279015	137	15.7377	12.0151	75.91
	183	ENSP00000346001	RPL3	Ribosomal protein L3	18	20.098	-1.52578	0.000279282	403	46.0798	10.1841	59.55
	184	ENSP00000287038	RPL30	Ribosomal protein L30	3	16.3302	-1.30713	0.0103049	115	12.7757	9.62744	51.3
	185	ENSP00000264258	RPL31	Ribosomal protein L31	7	21.4374	-1.52383	0.000328282	125	14.4539	10.5356	77.6
	186	ENSP00000412393	RPL32	Ribosomal protein L32	6	19.0512	-1.58614	0.000243785	133	15.6067	11.4438	63.91
	187	ENSP00000378163	RPL34	Ribosomal protein L34	7	18.1333	-1.54893	0.000223211	117	13.2845	11.4731	88.03
	188	ENSP00000259469	RPL35	Ribosomal protein L35	5	19.3218	-1.61644	0.000256466	123	14.5426	11.0483	65.04
	189	ENSP00000393393	RPL35A	Ribosomal protein L35a	8	19.0337	-1.6291	0.000241495	110	12.5298	11.063	77.27
	190	ENSP00000252543	RPL36	Ribosomal protein L36	10	15.1878	-1.58284	0.000141821	105	12.2459	11.5903	82.86
	191	ENSP00000274242	RPL37	Ribosomal protein L37	9	8.0938	-1.77029	0.00488619	97	11.0709	11.7368	65.98
	192	ENSP00000418082	RPL37A	Ribosomal protein L37a	2	19.3073	-1.81176	0.000248543	92	10.2685	10.4331	29.35
	193	ENSP00000412939	RPL4	Ribosomal protein L4	21	21.5196	-1.43823	0.00033203	406	45.47	11.0337	55.17
	194	ENSP00000359345	RPL5	Ribosomal protein L5	12	17.4301	-1.45218	0.000208968	297	34.3407	9.71533	49.49
	195	ENSP00000202773	RPL6	Ribosomal protein L6	11	20.4365	-1.47731	0.000289632	288	32.7076	10.5796	54.51
	196	ENSP00000339795	RPL7	Ribosomal protein L7	13	17.5652	-1.44743	0.000216871	248	29.2072	10.6528	75.4
	197	ENSP00000361076	RPL7A	Ribosomal protein L7a	12	21.0888	-1.50236	0.000310385	266	29.977	10.6089	58.65
	198	ENSP00000262584	RPL8	Ribosomal protein L8	17	19.4516	-1.54218	0.000262248	257	28.0073	11.0337	67.32
	199	ENSP00000425250	RPL9	Ribosomal protein L9	8	21.8088	-1.53638	0.000332024	189	21.5557	10.1548	54.5
	200	ENSP00000347271	RPS10	Ribosomal protein S10	6	18.5768	-1.65025	0.000219781	165	18.8859	10.1548	61.21
	201	ENSP00000270625	RPS11	Ribosomal protein S11	9	22.9249	-1.48682	0.000374706	158	18.419	10.3013	88.61
	202	ENSP00000230050	RPS12	Ribosomal protein S12	2	25.0536	-1.52477	0.015572	132	14.5055	7.21045	30.3
	203	ENSP00000435777	RPS13	Ribosomal protein S13	11	14.8865	-1.491	0.000147462	151	17.2117	10.5356	70.86
	204	ENSP00000311028	RPS14	Ribosomal protein S14	6	9.16885	-1.55074	5.21231e-05	151	16.2625	10.0522	50.99
	205	ENSP00000233609	RPS15	Ribosomal protein S15	4	16.7287	-1.60847	0.00018154	145	17.0292	10.3892	33.79
	206	ENSP00000318646	RPS15A	Ribosomal protein S15a	6	20.935	-1.61025	0.000306831	130	14.83	10.1255	96.92
	207	ENSP00000251453	RPS16	Ribosomal protein S16	10	21.988	-1.5188	0.000340904	146	16.435	10.2134	65.07
	208	ENSP00000346045	RPS17/RPS17L	Ribosomal protein S17	7	20.5412	-1.51617	0.000299694	135	15.5404	9.84717	50.37
	209	ENSP00000211372	RPS18	Ribosomal protein S18	15	18.4041	-1.63268	0.000225536	152	17.7079	10.9897	84.87
	210	ENSP00000221975	RPS19	Ribosomal protein S19	9	27.0319	-1.38583	0.000565022	145	16.0505	10.3159	63.45
	211	ENSP00000433170	RPS2	Ribosomal protein S2	5	20.0493	-1.47865	0.00028426	209	21.5994	10.6821	41.63
	212	ENSP00000009589	RPS20	Ribosomal protein S20	6	24.7298	-1.52474	0.000434012	119	13.3643	9.93506	63.03
	213	ENSP00000324438	RPS21	Ribosomal protein S21	3	9.12814	-1.78958	0.00549518	83	9.10557	8.49951	27.71
	214	ENSP00000236900	RPS25	Ribosomal protein S25	2	10.9255	-1.82133	0.00655628	125	13.7337	10.1108	26.4
	215	ENSP00000348849	RPS26	Ribosomal protein S26	3	10.1219	-1.86967	0.00604671	115	13.0071	11.0044	39.13
	216	ENSP00000397872	RPS28	Ribosomal protein S28	4	9.76183	-1.70298	0.00594004	69	7.8362	10.6968	52.17
	217	ENSP00000245458	RPS29	Ribosomal protein S29	2	6.671	-1.711	0.00405177	56	6.6723	10.1255	26.79
	218	ENSP00000433821	RPS3	Ribosomal protein S3	15	23.4258	-1.634	0.000373776	243	26.6714	9.65674	66.26
	219	ENSP00000346050	RPS3A	Ribosomal protein S3A	10	22.9874	-1.5319	0.000382458	264	29.9257	9.72998	74.62
	220	ENSP00000362744	RPS4X	Ribosomal protein S4, X-linked	9	22.3802	-1.53967	0.000356466	263	29.5791	10.1548	79.47
	221	ENSP00000196551	RPS5	Ribosomal protein S5	9	17.1366	-1.50494	0.000199293	204	22.8621	9.71533	42.65
	222	ENSP00000369757	RPS6	Ribosomal protein S6	17	19.8514	-1.48018	0.000279018	249	28.663	10.8433	64.26
	223	ENSP00000385729	RPS7	Ribosomal protein S7	7	24.0074	-1.47172	0.0004235	187	21.2988	10.272	45.45
	224	ENSP00000379888	RPS8	Ribosomal protein S8	16	19.2206	-1.53301	0.000251447	208	24.1902	10.3159	93.27
	225	ENSP00000302896	RPS9	Ribosomal protein S9	15	19.29	-1.49281	0.000259433	194	22.5776	10.6528	81.96
	226	ENSP00000389351	RPSA	Ribosomal protein SA	10	20.5718	-1.38356	0.000313686	300	33.2926	4.86865	54
	227	ENSP00000365946	RBM3	RNA binding motif (RNP1, RRM) protein 3	5	3.4826	-1.32621	0.00216978	157	17.16	8.90967	40.76
	228	ENSP00000352668	RBM12	RNA binding motif protein 12	7	23.046	1.40826	0.000375793	932	97.3334	8.63135	9.76
	229	ENSP00000357695	S100A16	S100 calcium binding protein A16	2	1.9743	-1.7028	0.00120594	103	11.794	6.78564	33.01
	230	ENSP00000355467	SCCPDH	Saccharopine dehydrogenase (putative)	2	15.8756	1.4497	0.0110041	429	47.1215	9.14404	5.83
	231	ENSP00000444567	SEPT7	Septin 7	9	20.5038	1.36611	0.000353852	382	44.6159	8.22119	42.67
	232	ENSP00000329161	SEPT9	Septin 9	11	24.29	1.30351	0.000528323	568	63.6259	8.39697	28.7
	233	ENSP00000350894	SERPINH1	Serpin peptidase inhibitor, clade H	13	9.87198	-1.34059	6.14124e-05	418	46.4112	8.68994	46.65
	234	ENSP00000354591	SERBP1	SERPINE1 mRNA binding protein 1	5	23.1082	-1.89203	0.0139268	393	43.1096	8.44092	18.83
	235	ENSP00000295702	SSR2	Signal sequence receptor, beta	3	9.73663	-1.46617	5.99517e-05	183	20.1225	8.35303	14.21
	236	ENSP00000265304	SSBP1	Single-stranded DNA binding protein 1, mitochondrial	5	10.0104	-1.8657	0.00599122	148	17.249	9.59814	37.84
	237	ENSP00000449166	SLC25A3	Solute carrier family 25, member 3	4	19.6181	1.59174	0.000282636	324	36.1376	9.26123	22.22
	238	ENSP00000227503	SF1	Splicing factor 1	8	7.13374	1.46314	3.84866e-05	548	59.6739	9.49561	23.91
	239	ENSP00000390956	SND1	Staphylococcal nuclease and tudor domain containing 1	23	14.8265	-1.55698	0.000147883	900	101.148	7.1665	38.11
	240	ENSP00000376472	STT3A	STT3, subunit of the oligosaccharyltransferase complex, homolog A	4	26.7829	-1.77557	0.000504716	705	80.4768	8.07471	9.08
	241	ENSP00000260324	SQRDL	Sulfide quinone reductase-like	5	14.5518	-1.65661	0.00887721	450	49.9289	9.11475	22.67
	242	ENSP00000374645	SOD1	Superoxide dismutase 1, soluble	2	13.552	1.46469	0.00939727	135	13.9008	6.11279	35.56
	243	ENSP00000442453	TXNDC5	Thioredoxin domain containing 5 (endoplasmic reticulum)	11	14.9686	-1.3518	0.000148612	360	40.3439	5.8335	40
	244	ENSP00000249042	TST	Thiosulfate sulfurtransferase	7	3.41332	-1.31799	0.00215206	297	33.4078	7.25439	34.01
	245	ENSP00000260356	THBS1	Thrombospondin 1	20	27.1611	-1.45697	0.000511227	1170	129.3	4.94482	23.93
	246	ENSP00000392282	THUMPD1	THUMP domain containing 1	4	10.4322	1.87336	9.71355e-05	439	48.5185	8.83643	15.03
	247	ENSP00000281537	TJP1	Tight junction protein 1	7	14.5087	1.30266	0.00984304	1748	195.34	6.69775	5.78
	248	ENSP00000321259	TALDO1	Transaldolase 1	6	23.8177	1.63364	0.000548707	337	37.5165	6.81494	27.89
	249	ENSP00000357075	TAGLN2	Transgelin 2	6	25.3892	1.61692	0.018029	199	22.3772	8.25049	51.26
	250	ENSP00000356448	TPR	Translocated promoter region, nuclear basket protein	30	8.59874	1.60766	0.00605508	2363	267.131	5.021	19.17
	251	ENSP00000436723	TMEM126A	Transmembrane protein 126A	3	1.49919	1.44565	0.001056	95	10.5577	9.34912	60
	252	ENSP00000222124	TMEM205	Transmembrane protein 205	5	14.8889	1.61938	0.0104659	189	21.1839	8.6167	27.51
	253	ENSP00000444420	TMEM30A	Transmembrane protein 30A	5	4.61402	1.32363	1.61708e-05	345	39.193	8.92432	16.52
	254	ENSP00000325223	TCOF1	Treacher Collins-Franceschetti syndrome 1	3	28.4772	1.36935	0.0197693	1411	144.228	9.0415	2.69
	255	ENSP00000379933	TPI1	Triosephosphate isomerase 1	4	7.3951	1.35241	4.05705e-05	249	26.6527	6.90283	39.76
	256	ENSP00000280591	TRNT1	tRNA nucleotidyl transferase, CCA-adding, 1	3	5.67583	1.71166	0.00402028	414	47.7989	8.48486	10.14
	257	ENSP00000369703	TUBB2A	Tubulin, beta 2A class IIa	3	26.6387	1.65542	0.000583023	445	49.875	4.89404	62.02
	258	ENSP00000320295	TUBB3	Tubulin, beta 3 class III	7	6.43176	1.8039	3.48819e-05	450	50.4003	4.93213	71.11
	259	ENSP00000306330	YWHAG	Tyrosine 3-monooxygenase activation protein, gamma polypeptide	5	17.9082	-1.32135	0.000211439	247	28.2849	4.89404	43.32
	260	ENSP00000373883	USP5	Ubiquitin specific peptidase 5 (isopeptidase T)	15	8.83188	1.65432	6.48882e-05	835	93.2484	5.08447	23.35
	261	ENSP00000338413	UBA1	Ubiquitin-like modifier activating enzyme 1	15	10.9224	1.53719	9.04437e-05	1058	117.774	5.75732	26.47
	262	ENSP00000246548	UBA2	Ubiquitin-like modifier activating enzyme 2	9	7.76533	1.52323	4.95968e-05	640	71.1792	5.2876	24.38
	263	ENSP00000400294	UBA3	Ubiquitin-like modifier activating enzyme 3	7	14.7996	2.15797	0.0109001	422	47.2417	5.24951	18.96
	264	ENSP00000400407	UBXN4	UBX domain protein 4	3	8.1726	1.54622	0.00571376	490	55.0219	6.94678	11.22
	265	ENSP00000445017	GALNT2	UDP-N-acetyl-alpha-D-galactosamine:polypeptide N-acetylgalactosaminyltransferase 2	4	1.94118	2.19835	0.00137177	533	60.7554	7.6499	15.76
	266	ENSP00000434393	VPS28	Vacuolar protein sorting 28 homolog	2	5.23572	-1.56442	0.00321162	161	18.4574	6.21436	20.5
	267	ENSP00000054666	VAMP3	Vesicle-associated membrane protein 3	3	9.00512	2.15214	0.00659466	100	11.302	8.79248	58
	268	ENSP00000361841	VCL	Vinculin	38	15.1444	1.35754	0.000194555	1066	116.649	6.0874	61.63
	269	ENSP00000371890	WDR1	WD repeat domain 1	10	12.1924	2.06692	0.000130548	606	66.1519	6.65381	31.02
	270	ENSP00000262238	YY1	YY1 transcription factor	2	12.5356	1.52194	0.00869001	414	44.6847	6.25244	4.35

## Sheet: S3
	Table S3. All identified proteins from both dose rates, week 10, are shown.
	Accession	Description	Σ# Unique Peptides	ICPL_0/ICPL_4 Variability [%]	ICPL_0/ICPL_4	ICPL_0/ICPL_6 Variability [%]	ICPL_0/ICPL_6	ICPL_0/ICPL_4 Count	ICPL_0/ICPL_6 Count	ICPL_4/ICPL_6 Variability [%]	ICPL_4/ICPL_6	ICPL_4/ICPL_6 Count	ΣCoverage	Σ# Proteins	Σ# Peptides	Σ# PSMs	Area	Score A2	Coverage A2	# Peptides A2	# PSM A2	Score B2	Coverage B2	# Peptides B2	# PSM B2	Score C2	Coverage C2	# Peptides C2	# PSM C2	# AAs	MW [kDa]	calc. pI
	ENSP00000437791	LARS HGNC Symbol|leucyl-tRNA synthetase [Source:HGNC Symbol;Acc:6512]|5|ENSG00000133706|ENST00000545646	13		0.118504		0.134536	-;-;1	-;-;1		1.09443	-;-;1	18.85	6	15	70	5.46758e+07	270.897	13.27	10	20	428.58	10.71	10	24	435.03	14.87	13	26	1130	129.132	7.86963
	ENSP00000296122	PPP1CB HGNC Symbol|protein phosphatase 1, catalytic subunit, beta isozyme [Source:HGNC Symbol;Acc:9282]|ENSG00000213639|2|ENST00000296122	2		0.978331		0.161944	-;2;-	-;2;-		0.160258	-;2;-	19.57	11	8	64	3.03358e+07	179.358	11.31	4	15	208.767	17.13	7	24	310.259	19.57	8	25	327	37.1626	6.18896
	ENSP00000398330	NQO1 HGNC Symbol|NAD(P)H dehydrogenase, quinone 1 [Source:HGNC Symbol;Acc:2874]|16|ENSG00000181019|ENST00000439109	3	20.1777	0.355614	10.2528	0.171952	1;1;1	1;1;1	11.5236	0.48348	1;1;1	10.4	6	3	9	1.02962e+07	50.05	9.9	2	2	65.2293	10.4	3	3	111.16	9.9	2	4	202	22.7789	8.49951
	ENSP00000441414	ZNF185 HGNC Symbol|zinc finger protein 185 (LIM domain) [Source:HGNC Symbol;Acc:12976]|ENSG00000147394|X|ENST00000535156	11		0.28015		0.185743	-;1;-	-;1;-		0.641892	-;1;-	34.16	14	12	71	2.37946e+07	292.554	18.51	6	15	556.081	27.1	9	26	689.6	31.3	11	30	524	55.9771	5.31299
	ENSP00000229319	LDHB HGNC Symbol|lactate dehydrogenase B [Source:HGNC Symbol;Acc:6541]|ENSG00000111716|12|ENST00000350669	2		0.748875		0.236288	-;-;1	-;-;1		0.304169	-;-;1	24.55	10	4	27	3.64693e+08	238.165	5.39	2	5	326.062	24.55	4	11	368.151	14.07	3	11	334	36.6151	6.04932
	ENSP00000361212	UROD HGNC Symbol|uroporphyrinogen decarboxylase [Source:HGNC Symbol;Acc:12591]|ENSG00000126088|1|ENST00000372139	3		0.380808	68.9228	0.261931	-;1;1	-;1;1	10.4313	0.692953	-;1;1	23.35	4	4	7	1.86928e+07					90.7267	23.35	4	4	33.79	13.66	2	3	227	25.298	5.31299
	ENSP00000439331	PRPF4B HGNC Symbol|PRP4 pre-mRNA processing factor 4 homolog B (yeast) [Source:HGNC Symbol;Acc:17346]|ENSG00000112739|6|ENST00000538861	3		1.20563		0.263814	-;-;1	-;-;1		0.210944	-;-;1	6.75	3	4	8	1.22422e+07	86.22	2.32	2	2	93	5.64	3	4	77.42	2.82	2	2	993	115.374	10.272
	ENSP00000340870	PVR HGNC Symbol|poliovirus receptor [Source:HGNC Symbol;Acc:9705]|ENSG00000073008|19|ENST00000344956	5	22.2619	0.408142	15.4014	0.2797	3;3;1	3;3;1	20.3514	0.641656	3;3;1	19.51	5	6	56	4.25101e+07	120.765	19.51	6	17	131.917	18.13	5	18	122.525	19.51	6	21	364	39.2797	6.21436
	ENSP00000295920	GMPS HGNC Symbol|guanine monphosphate synthetase [Source:HGNC Symbol;Acc:4378]|ENSG00000163655|3|ENST00000295920	7	5.55097	0.475601		0.295549	1;-;1	1;-;1	25.4402	0.618243	1;-;1	18.01	3	7	23	1.4921e+07	60.41	12.63	5	5	72.02	9.43	5	8	85.265	18.01	7	10	594	65.8875	7.47412
	ENSP00000359836	PHF6 HGNC Symbol|PHD finger protein 6 [Source:HGNC Symbol;Acc:18145]|ENSG00000156531|X|ENST00000370800	4		1.03033		0.314352	2;-;-	2;-;-		0.313602	2;-;-	21.47	5	4	9	5.61367e+06	51.7204	13.46	3	5	39.9506	5.13	1	2	41.9903	13.14	2	2	312	35.3063	9.0415
	ENSP00000400689	MCM4 HGNC Symbol|minichromosome maintenance complex component 4 [Source:HGNC Symbol;Acc:6947]|ENSG00000104738|8|ENST00000429229	3		0.681308		0.334385	-;1;-	-;1;-		0.475165	-;1;-	2.92	5	3	6	2.98097e+06	29.23	1.09	1	1	41.53	2.92	3	3	28.5	2.07	2	2	823	92.7451	7.06396
	ENSP00000216194	ADSL HGNC Symbol|adenylosuccinate lyase [Source:HGNC Symbol;Acc:291]|22|ENSG00000239900|ENST00000216194	3		0.620153		0.34284	1;-;-	1;-;-		0.568241	1;-;-	16.12	6	5	11	8.8608e+07	111.877	13.43	4	6	58	2.27	1	1	116.447	11.16	4	4	484	54.854	7.10791
	ENSP00000445896	CAPG HGNC Symbol|capping protein (actin filament), gelsolin-like [Source:HGNC Symbol;Acc:1474]|ENSG00000042493|2|ENST00000542681	4		1.24529		0.343064	-;1;-	-;1;-		0.266713	-;1;-	13.15	6	4	6	1.64104e+07					62.3043	9.17	3	3	90.6901	11.01	3	3	327	36.2254	6.25244
	ENSP00000407801	C17orf57 HGNC Symbol|chromosome 17 open reading frame 57 [Source:HGNC Symbol;Acc:26864]|ENSG00000178852|17|ENST00000435993	6	13.7476	0.814973	3.30076	0.344621	2;4;6	2;4;6	15.6078	0.438696	2;4;6	17.31	2	6	38	7.96373e+06	133.255	12.78	4	12	182.956	9.32	4	13	155.23	9.32	4	13	751	83.5316	5.05908
	ENSP00000341538	SEC61G HGNC Symbol|Sec61 gamma subunit [Source:HGNC Symbol;Acc:18277]|7|ENSG00000132432|ENST00000352861	1		0.473524		0.345383	-;-;1	-;-;1		0.703142	-;-;1	11.76	1	1	1	11459199									24.11	11.76	1	1	68	7.73617	9.99365
	ENSP00000442922	PBXIP1 HGNC Symbol|pre-B-cell leukemia homeobox interacting protein 1 [Source:HGNC Symbol;Acc:21199]|ENSG00000163346|1|ENST00000543593	6		0.36053		0.347692	-;1;-	-;1;-		0.933673	-;1;-	14.4	6	6	18	4.82696e+06	87.54	9.27	4	5	103.26	10.65	4	5	128.81	12.62	5	8	507	57.5851	6.75635
	ENSP00000339467	RHOG HGNC (curated)|Rho-related GTP-binding protein RhoG Precursor [Source:UniProtKB/Swiss-Prot;Acc:P84095]|11|ENSG00000177105|ENST00000351018	2		0.334178		0.348106	-;-;1	-;-;1		1.00419	-;-;1	22.51	1	3	3	9.66801e+06									23.24	22.51	3	3	191	21.2949	8.11865
	ENSP00000373487	KRT18P19 HGNC (automatic)|Keratin, type I cytoskeletal 18 (Cytokeratin-18)(CK-18)(Keratin-18)(K18)(Cell proliferation-inducing gene 46 protein) [Source:UniProtKB/Swiss-Prot;Acc:P05783]|12|ENSG00000111057|ENST00000388835	18	57.152	1.84062	56.36	0.36334	9;27;25	9;27;25	45.2714	0.185028	9;27;25	60.47	3	19	177	1.18282e+08	570.717	40.7	15	37	1278.56	60.47	19	68	1353.03	58.6	18	72	430	48.0285	5.45264
	ENSP00000384617	BZW2 HGNC Symbol|basic leucine zipper and W2 domains 2 [Source:HGNC Symbol;Acc:18808]|7|ENSG00000136261|ENST00000407633	2		0.676408		0.373085	1;-;-	1;-;-		0.566942	1;-;-	8.44	5	2	2	7.78109e+06	24.41	8.44	2	2									225	26.1655	5.5542
	ENSP00000329243	KRT7 HGNC (automatic)|Keratin, type II cytoskeletal 7 (Cytokeratin-7)(CK-7)(Keratin-7)(K7)(Sarcolectin) [Source:UniProtKB/Swiss-Prot;Acc:P08729]|12|ENSG00000135480|ENST00000331817	16	34.3827	2.30131	32.639	0.37728	2;18;23	2;18;23	32.7988	0.167848	2;18;23	47.76	5	19	246	4.30083e+08	811.834	43.5	14	52	1675.88	47.76	16	89	2018.26	47.76	19	105	469	51.3543	5.47803
	ENSP00000354876	MT-CO2 HGNC (automatic)|Cytochrome c oxidase subunit 2 (Cytochrome c oxidase polypeptide II) [Source:UniProtKB/Swiss-Prot;Acc:P00403]|MT|ENSG00000198712|ENST00000361739	3		0.60901		0.380992	-;-;1	-;-;1		0.60308	-;-;1	19.38	1	3	17	7.40481e+07	48.24	4.41	1	4	56.4463	7.49	2	6	106.96	19.38	3	7	227	25.5482	4.81787
	ENSP00000442728	MCM7 HGNC Symbol|minichromosome maintenance complex component 7 [Source:HGNC Symbol;Acc:6950]|ENSG00000166508|7|ENST00000542483	12		0.2578		0.381052	-;-;2	-;-;2		1.4249	-;-;2	26.83	6	15	46	1.43352e+07	134.503	12.35	7	13	262.447	17.99	10	16	250.007	21.65	11	17	656	73.8947	7.82568
	ENSP00000349437	IGF2R HGNC (curated)|Cation-independent mannose-6-phosphate receptor Precursor (CI Man-6-P receptor)(CI-MPR)(M6PR)(Insulin-like growth factor 2 receptor)(Insulin-like growth factor II receptor)(IGF-II receptor)(M6P/IGF2 receptor)(M6P/IGF2R)(300 kDa mannose 6-phosphate receptor)(MPR 300)(CD222 antigen) [Source:UniProtKB/Swiss-Prot;Acc:P11717]|6|ENSG00000197081|ENST00000356956	9		0.493295		0.383166	-;-;1	-;-;1		0.748796	-;-;1	5.1	1	13	34	1.73856e+07	121.165	4.05	10	13	160.312	3.37	9	12	124.733	2.93	8	9	2491	274.199	5.93506
	ENSP00000377406	COASY HGNC Symbol|CoA synthase [Source:HGNC Symbol;Acc:29932]|17|ENSG00000068120|ENST00000393818	5		1.1925		0.383237	-;1;-	-;1;-		0.311137	-;1;-	8.87	3	5	8	7.3647e+06					38.2025	7.09	4	5	85.59	4.61	3	3	564	62.29	6.99072
	ENSP00000423214	NLN HGNC Symbol|neurolysin (metallopeptidase M3 family) [Source:HGNC Symbol;Acc:16058]|ENSG00000123213|5|ENST00000502464	3		0.525455		0.385585	-;-;1	-;-;1		0.707405	-;-;1	6	5	4	6	8.83885e+06	69.24	1.67	1	1	70.98	4.5	3	3	72.4686	3.17	2	2	600	68.8235	6.45557
	ENSP00000407375	GPX1 HGNC Symbol|glutathione peroxidase 1 [Source:HGNC Symbol;Acc:4553]|ENSG00000233276|3|ENST00000419783	4		0.636031	10.2684	0.387337	-;1;1	-;1;1	7.92457	0.587807	-;1;1	39.41	2	4	20	5.33514e+07					150.24	39.41	4	7	270.32	39.41	4	13	203	22.0751	6.55127
	ENSP00000356110	NUCKS1 HGNC Symbol|nuclear casein kinase and cyclin-dependent kinase substrate 1 [Source:HGNC Symbol;Acc:29923]|ENSG00000069275|1|ENST00000367142	2		0.361726	5.19835	0.387964	-;1;1	-;1;1	1.19552	1.03645	-;1;1	8.23	2	2	7	1.06033e+07					25.84	8.23	2	4	26.37	8.23	2	3	243	27.28	5.08447
	ENSP00000263212	PPM1F HGNC Symbol|protein phosphatase, Mg2+/Mn2+ dependent, 1F [Source:HGNC Symbol;Acc:19388]|ENSG00000100034|22|ENST00000263212	11		0.544034		0.392413	-;-;1	-;-;1		0.695346	-;-;1	44.93	5	12	60	3.56195e+07	376.723	33.26	9	21	400.967	33.04	9	16	457.603	42.07	10	23	454	49.8001	5.09717
	ENSP00000381604	GSTP1 HGNC Symbol|glutathione S-transferase pi 1 [Source:HGNC Symbol;Acc:4638]|ENSG00000084207|11|ENST00000398603	2	32.3341	0.740017	19.3307	0.397775	2;1;1	2;1;1	13.0355	0.544467	2;1;1	25.29	2	3	11	7.59587e+07	51.88	18.97	2	5	60.71	21.26	2	2	78.33	21.26	2	4	174	19.468	5.97314
	ENSP00000350563	RNF40 HGNC Symbol|ring finger protein 40 [Source:HGNC Symbol;Acc:16867]|ENSG00000103549|16|ENST00000357890	3		0.672936		0.408889	-;-;1	-;-;1		0.585754	-;-;1	6.66	7	5	7	4.16683e+07									33.5497	6.66	5	7	901	101.984	6.50732
	ENSP00000264193	CPOX HGNC Symbol|coproporphyrinogen oxidase [Source:HGNC Symbol;Acc:2321]|ENSG00000080819|3|ENST00000264193	5		0.595946		0.411155	-;-;1	-;-;1		0.665093	-;-;1	16.52	3	6	19	1.27681e+07	45.57	7.71	3	7	89.7733	8.15	3	4	90.74	14.1	5	8	454	50.12	8.25049
	ENSP00000443524	NAA15 HGNC Symbol|N(alpha)-acetyltransferase 15, NatA auxiliary subunit [Source:HGNC Symbol;Acc:30782]|4|ENSG00000164134|ENST00000544077	4		0.600849		0.416939	2;-;-	2;-;-		0.713259	2;-;-	6.49	3	4	9	6.42144e+06	56.18	6.49	4	4	78.17	4.19	3	3	76.63	2.97	2	2	740	86.3869	6.354
	ENSP00000261210	TMPO HGNC (automatic)|Lamina-associated polypeptide 2, isoforms beta/gamma (Thymopoietin, isoforms beta/gamma)(TP beta/gamma)(Thymopoietin-related peptide isoforms beta/gamma)(TPRP isoforms beta/gamma) [Contains Thymopoietin(TP)(Splenin);Thymopentin(TP5)] [Source:UniProtKB/Swiss-Prot;Acc:P42167]|12|ENSG00000120802|ENST00000261210	2	83.9849	0.662097	105.717	0.425176	1;1;-	1;1;-		0.55509	1;1;-	50	4	14	93	2.53046e+07	301.466	47.8	13	32	321.304	48.68	13	34	344.427	34.58	11	27	454	50.6395	9.37842
	ENSP00000355237	CDC42BPB HGNC Symbol|CDC42 binding protein kinase beta (DMPK-like) [Source:HGNC Symbol;Acc:1738]|14|ENSG00000198752|ENST00000361246	3	19.1455	0.523539		0.426788	1;-;1	1;-;1	18.261	0.825655	1;-;1	2.4	1	6	26	7.66418e+06	40.4967	1.64	3	6	0	0.94	4	9	48.33	1.81	4	11	1711	194.193	6.3667
	ENSP00000293308	KRT8P9 HGNC (automatic)|Keratin, type II cytoskeletal 8 (Cytokeratin-8)(CK-8)(Keratin-8)(K8) [Source:UniProtKB/Swiss-Prot;Acc:P05787]|12|ENSG00000170421|ENST00000293308	1		2.27147	17.0439	0.427484	-;2;2	-;2;2	24.7911	0.191422	-;2;2	11.8	3	4	89	5.11663e+08	337.55	1.86	1	21	458.806	7.45	3	30	545.488	11.8	4	38	483	53.6711	5.59229
	ENSP00000411226	CTNNB1 HGNC Symbol|catenin (cadherin-associated protein), beta 1, 88kDa [Source:HGNC Symbol;Acc:2514]|ENSG00000168036|3|ENST00000453024	13	9.36135	0.519671	16.5378	0.434552	1;2;-	1;2;-		0.849297	1;2;-	30.23	3	15	86	6.52277e+07	605.788	30.23	15	34	574.494	28.81	14	27	560.652	24.42	12	25	774	84.7119	5.92236
	ENSP00000267812	MFAP1 HGNC Symbol|microfibrillar-associated protein 1 [Source:HGNC Symbol;Acc:7032]|15|ENSG00000140259|ENST00000267812	2		0.456564		0.440107	-;-;2	-;-;2		0.929266	-;-;2	7.97	1	3	4	8.97077e+06									20.08	7.97	3	4	439	51.9266	4.98291
	ENSP00000435459	C14orf159 HGNC Symbol|chromosome 14 open reading frame 159 [Source:HGNC Symbol;Acc:20498]|ENSG00000133943|14|ENST00000525393	3		0.8821		0.441844	1;-;-	1;-;-		0.514862	1;-;-	9.15	8	3	10	7.29491e+06	19.49	7.11	2	5	48.12	3.86	2	3	27.22	7.11	2	2	492	52.5878	6.354
	ENSP00000440623	DDX24 HGNC Symbol|DEAD (Asp-Glu-Ala-Asp) box polypeptide 24 [Source:HGNC Symbol;Acc:13266]|14|ENSG00000089737|ENST00000544005	6		0.573585		0.443784	-;1;-	-;1;-		0.749058	-;1;-	14.61	6	6	26	4.60599e+06	68.23	7.22	4	11	32.9727	10.51	4	7	34.95	8.7	4	8	609	68.9302	9.08545
	ENSP00000309558	TAF15 HGNC Symbol|TAF15 RNA polymerase II, TATA box binding protein (TBP)-associated factor, 68kDa [Source:HGNC Symbol;Acc:11547]|ENSG00000172660|17|ENST00000311979	3		0.630188		0.446866	-;-;4	-;-;4		0.700082	-;-;4	8.78	2	4	10	1.29297e+07									72.0894	8.78	4	10	592	61.7931	8.01611
	ENSP00000254941	NIP7 HGNC Symbol|nuclear import 7 homolog (S. cerevisiae) [Source:HGNC Symbol;Acc:24328]|16|ENSG00000132603|ENST00000254941	1		1.01064		0.449189	-;-;1	-;-;1		0.428465	-;-;1	15.04	2	1	1	929167									39.89	15.04	1	1	133	15.2118	8.26514
	ENSP00000350534	FN1 HGNC (curated)|Fibronectin Precursor (FN)(Cold-insoluble globulin)(CIG) [Contains Ugl-Y1;Ugl-Y2;Ugl-Y3] [Source:UniProtKB/Swiss-Prot;Acc:P02751]|2|ENSG00000115414|ENST00000357867	34	39.3563	0.554044	26.38	0.451717	2;6;4	2;6;4	15.1119	0.820332	2;7;4	23.02	17	35	177	8.45806e+07	450.215	12.73	23	35	1042.76	18.47	30	78	1025.52	18.11	29	64	2176	239.476	5.88428
	ENSP00000357283	LMNA HGNC Symbol|lamin A/C [Source:HGNC Symbol;Acc:6636]|ENSG00000160789|1|ENST00000368300	4	19.056	0.574869	46.1649	0.453337	3;4;5	3;4;5	31.6281	0.757313	3;4;5	81.78	8	45	2212	1.13131e+09	15621.6	81.78	44	664	17590.1	81.78	43	770	19397.7	81.78	44	778	664	74.0947	7.02002
	ENSP00000324463	YLPM1 HGNC Symbol|YLP motif containing 1 [Source:HGNC Symbol;Acc:17798]|ENSG00000119596|14|ENST00000325680	8		0.575697		0.453786	-;1;-	-;1;-		0.763131	-;1;-	5.36	6	11	23	2.31977e+07	77.0316	3.22	7	7	70.61	3.77	8	8	45.57	3.91	7	8	2146	241.495	6.55127
	ENSP00000445017	GALNT2 HGNC Symbol|UDP-N-acetyl-alpha-D-galactosamine:polypeptide N-acetylgalactosaminyltransferase 2 (GalNAc-T2) [Source:HGNC Symbol;Acc:4124]|ENSG00000143641|1|ENST00000543760	4	2.23032	0.443407	1.94118	0.454887	2;1;-	2;1;-		1.02523	2;1;-	15.76	5	7	20	9.1085e+06	65.8	6.19	3	8	77.59	11.63	5	6	33.1723	3.38	2	6	533	60.7554	7.6499
	ENSP00000414803	LASP1 HGNC Symbol|LIM and SH3 protein 1 [Source:HGNC Symbol;Acc:6513]|ENSG00000002834|17|ENST00000443937	1	35.8655	0.422896	36.6663	0.455991	1;1;1	1;1;1	29.426	1.10612	1;1;1	9.6	3	1	4	5.9469e+06	78.11	9.6	1	2	42.99	9.6	1	1	57.31	9.6	1	1	125	14.5881	8.68994
	ENSP00000305692	GAA HGNC Symbol|glucosidase, alpha; acid [Source:HGNC Symbol;Acc:4065]|ENSG00000171298|17|ENST00000302262	6		0.600696	10.3207	0.457297	-;1;2	-;1;2	3.72289	0.734626	-;1;2	8.19	1	6	31	8.91419e+06	77.853	8.19	6	12	53.543	7.04	5	10	67.9667	4.52	4	9	952	105.257	5.99854
	ENSP00000415283	ICAM2 HGNC Symbol|intercellular adhesion molecule 2 [Source:HGNC Symbol;Acc:5345]|ENSG00000108622|17|ENST00000412356	5		0.589047	9.47787	0.458293	-;1;1	-;1;1	24.9413	0.766414	-;1;1	19.27	1	5	40	4.51336e+07	187.87	10.91	3	13	240.785	19.27	5	13	251.264	19.27	5	14	275	30.6346	7.43018
	ENSP00000354649	MAGT1 HGNC Symbol|magnesium transporter 1 [Source:HGNC Symbol;Acc:28880]|X|ENSG00000102158|ENST00000358075	5		0.456384		0.463074	-;1;-	-;1;-		0.982339	-;1;-	16.62	3	6	13	2.29961e+07	52.5104	10.08	5	5	83.9142	12.81	4	5	64.1846	6.27	3	3	367	41.5043	9.93506
	ENSP00000400294	UBA3 HGNC Symbol|ubiquitin-like modifier activating enzyme 3 [Source:HGNC Symbol;Acc:12470]|ENSG00000144744|3|ENST00000415609	7	35.3532	0.824493	14.7996	0.463398	2;2;-	2;2;-		0.585261	2;2;-	18.96	6	7	26	1.07286e+07	134.39	18.96	7	9	142.577	15.4	6	11	55.3677	4.03	2	6	422	47.2417	5.24951
	ENSP00000054666	VAMP3 HGNC Symbol|vesicle-associated membrane protein 3 (cellubrevin) [Source:HGNC Symbol;Acc:12644]|ENSG00000049245|1|ENST00000054666	3		0.985397	9.00512	0.464655	-;2;2	-;2;2	14.8164	0.45757	-;2;2	58	10	4	11	1.78283e+07					101.44	58	4	7	27.14	42	3	4	100	11.302	8.79248
	ENSP00000422683	ACAD9 HGNC Symbol|acyl-CoA dehydrogenase family, member 9 [Source:HGNC Symbol;Acc:21497]|3|ENSG00000177646|ENST00000508971	5		0.352349		0.467041	-;1;-	-;1;-		1.28328	-;1;-	19.27	3	7	23	1.35395e+07	102.54	13.02	5	7	98.5204	17.71	6	7	109.69	12.76	5	9	384	43.0473	8.08936
	ENSP00000342778	PPM1G HGNC Symbol|protein phosphatase, Mg2+/Mn2+ dependent, 1G [Source:HGNC Symbol;Acc:9278]|ENSG00000115241|2|ENST00000344034	4	15.3237	0.661453	23.8434	0.472109	1;1;3	1;1;3	34.364	0.725227	1;1;3	17.22	3	5	13	8.1327e+06	58.59	8.06	2	3	59.75	8.06	2	2	145.093	17.22	5	8	546	59.2347	4.36084
	ENSP00000450191	CD63 HGNC Symbol|CD63 molecule [Source:HGNC Symbol;Acc:1692]|12|ENSG00000135404|ENST00000546457	1		0.63134		0.472934	-;1;-	-;1;-		0.725234	-;1;-	9.02	8	1	1	14202269					31.67	9.02	1	1					133	14.2554	7.59131
	ENSP00000238497	VPS4B HGNC Symbol|vacuolar protein sorting 4 homolog B (S. cerevisiae) [Source:HGNC Symbol;Acc:10895]|ENSG00000119541|18|ENST00000238497	3		0.589111		0.478778	2;-;-	2;-;-		0.835365	2;-;-	8.33	1	4	6	1.15024e+07	20.84	8.33	4	5	23.21	2.48	1	1					444	49.2715	7.2251
	ENSP00000437512	MAGOHB HGNC Symbol|mago-nashi homolog B (Drosophila) [Source:HGNC Symbol;Acc:25504]|12|ENSG00000111196|ENST00000544850	2		1.03597	36.1588	0.481015	-;2;2	-;2;2	50.3891	0.561271	-;2;2	44.44	7	2	8	3.17156e+07					66.7267	44.44	2	3	71.68	44.44	2	5	90	10.7083	7.50342
	ENSP00000261190	C12orf11 HGNC Symbol|chromosome 12 open reading frame 11 [Source:HGNC Symbol;Acc:20174]|ENSG00000064102|12|ENST00000261190	1		0.537518	38.2374	0.4814	-;1;1	-;1;1	18.3837	0.849423	-;1;1	30.95	5	2	4	3.65563e+07					31.69	30.95	2	2	25.21	30.95	2	2	84	10.0252	9.59814
	ENSP00000269243	MYH10 HGNC (curated)|Myosin-10 (Myosin heavy chain 10)(Myosin heavy chain, non-muscle IIb)(Non-muscle myosin heavy chain IIb)(NMMHC II-b)(NMMHC-IIB)(Cellular myosin heavy chain, type B)(Non-muscle myosin heavy chain B)(NMMHC-B) [Source:UniProtKB/Swiss-Prot;Acc:P35580]|17|ENSG00000133026|ENST00000269243	23	40.1667	1.0879	10.7704	0.482353	7;10;10	7;10;10	22.0375	0.474762	7;10;10	19.03	12	35	300	3.91507e+08	603.823	12.9	25	81	1060.84	15.89	31	117	1010.55	14.32	27	102	1976	228.858	5.5415
	ENSP00000371890	WDR1 HGNC (automatic)|WD repeat-containing protein 1 (Actin-interacting protein 1)(AIP1)(NORI-1) [Source:UniProtKB/Swiss-Prot;Acc:O75083]|4|ENSG00000071127|ENST00000382452	10	5.19192	0.621024	12.1924	0.483813	13;12;10	13;12;10	24.8722	0.781851	13;13;10	31.02	5	10	220	9.24111e+07	702.922	26.73	9	52	637.48	31.02	10	62	926.86	24.26	7	106	606	66.1519	6.65381
	ENSP00000339495	COBRA1 HGNC Symbol|cofactor of BRCA1 [Source:HGNC Symbol;Acc:24324]|ENSG00000188986|9|ENST00000343053	5		0.360003		0.48863	-;-;2	-;-;2		1.30845	-;-;2	8.97	1	6	22	1.60708e+07	91.754	8.97	6	9	48.6158	6.72	4	4	125.625	8.97	6	9	580	65.6554	6.12549
	ENSP00000371393	PGM2 HGNC Symbol|phosphoglucomutase 2 [Source:HGNC Symbol;Acc:8906]|4|ENSG00000169299|ENST00000381967	7	42.006	0.563553	24.2984	0.492715	1;2;2	1;2;2	21.9788	0.907389	1;2;2	12.91	5	7	25	1.35315e+07	104.152	12.91	7	9	94.46	4.08	3	6	147.466	10.46	6	10	612	68.2404	6.72705
	ENSP00000246071	SNRPB2 HGNC Symbol|small nuclear ribonucleoprotein polypeptide B [Source:HGNC Symbol;Acc:11155]|ENSG00000125870|20|ENST00000246071	4		1.9034		0.493286	-;-;1	-;-;1		0.249834	-;-;1	24.89	1	4	10	1.84289e+07					77.95	24.89	3	3	90.38	24.89	4	7	225	25.4701	9.71533
	ENSP00000334008	PARVA HGNC Symbol|parvin, alpha [Source:HGNC Symbol;Acc:14652]|ENSG00000197702|11|ENST00000334956	2		1.95129		0.49379	1;-;-	1;-;-		0.260112	1;-;-	14.52	4	3	6	3.01529e+07	89.17	8.6	2	2	131.91	14.52	2	3	70.66	4.3	1	1	372	42.2174	5.94775
	ENSP00000269143	AFG3L2 HGNC (curated)|AFG3-like protein 2 (EC 3.4.24.-)(Paraplegin-like protein) [Source:UniProtKB/Swiss-Prot;Acc:Q9Y4W6]|18|ENSG00000141385|ENST00000269143	4		0.683112		0.494313	1;-;-	1;-;-		0.743789	1;-;-	5.27	2	4	20	2.38312e+07	128.162	5.27	4	7	82.8813	3.14	3	6	86.6996	5.27	4	7	797	88.5282	8.66064
	ENSP00000432712	FAM118B HGNC Symbol|family with sequence similarity 118, member B [Source:HGNC Symbol;Acc:26110]|11|ENSG00000197798|ENST00000529731	2		0.874802		0.495957	-;1;-	-;1;-		0.548878	-;1;-	6.91	4	2	2	2.57558e+06					20.05	6.91	2	2					275	30.794	7.00537
	ENSP00000426273	MAN2B2 HGNC Symbol|mannosidase, alpha, class 2B, member 2 [Source:HGNC Symbol;Acc:29623]|ENSG00000013288|4|ENST00000505907	7	80.0601	0.632598		0.50331	1;-;1	1;-;1	46.6578	0.98253	1;-;1	11.54	3	8	17	1.25375e+07	74.8217	7.45	5	5	100.51	7.66	5	5	62.6068	8.29	6	7	953	107.558	7.04932
	ENSP00000368195	HNRPLL HGNC Symbol|heterogeneous nuclear ribonucleoprotein L-like [Source:HGNC Symbol;Acc:25127]|2|ENSG00000143889|ENST00000378915	3		0.636119		0.504273	-;1;-	-;1;-		0.767484	-;1;-	10.24	4	4	20	1.68309e+07	70.1818	6.5	3	5	64.13	9.25	3	7	53.6406	4.13	2	8	508	56.4151	7.79639
	ENSP00000263575	APLP2 HGNC Symbol|amyloid beta (A4) precursor-like protein 2 [Source:HGNC Symbol;Acc:598]|ENSG00000084234|11|ENST00000345598	4		0.691839		0.504701	-;-;1	-;-;1		0.703254	-;-;1	13.41	8	5	21	5.54909e+06	40.2485	6.13	3	6	62.0893	9.58	4	8	39.9067	9.96	4	7	522	59.1141	5.59229
	ENSP00000345532	NASP HGNC Symbol|nuclear autoantigenic sperm protein (histone-binding) [Source:HGNC Symbol;Acc:7644]|ENSG00000132780|1|ENST00000341288	4	37.4516	0.73999	33.9222	0.511919	3;6;5	3;6;5	25.2104	0.816708	3;6;5	7.85	9	4	29	8.04781e+06	41.82	4.07	2	4	196.293	5.67	3	11	197.826	7.85	4	14	688	74.7598	4.27197
	ENSP00000230495	HIST1H3F HGNC (curated)|Histone H3.1 (H3/a)(H3/b)(H3/c)(H3/d)(H3/f)(H3/h)(H3/i)(H3/j)(H3/k)(H3/l) [Source:UniProtKB/Swiss-Prot;Acc:P68431]|6|ENSG00000112727|ENST00000230495	1	12.0485	0.68301	22.9066	0.512178	10;10;12	10;10;12	32.0579	0.756036	10;10;12	83.82	3	10	682	1.88562e+09	3045.4	79.41	9	170	4746.29	83.82	10	258	5324.79	83.82	10	254	136	15.3945	11.1216
	ENSP00000391890	PEPD HGNC Symbol|peptidase D [Source:HGNC Symbol;Acc:8840]|ENSG00000124299|19|ENST00000436370	6	26.955	0.749972	13.2854	0.513638	3;2;3	3;2;3	18.5672	0.709518	3;2;3	21.68	3	7	42	8.73959e+07	239.913	20.51	6	15	263.635	20.51	6	13	307.096	21.68	7	14	429	47.2304	6.07471
	ENSP00000380214	SLC2A1 HGNC Symbol|solute carrier family 2 (facilitated glucose transporter), member 1 [Source:HGNC Symbol;Acc:11005]|1|ENSG00000117394|ENST00000397019	2		0.566112		0.517267	-;1;-	-;1;-		0.884614	-;1;-	8.06	4	4	8	3.07155e+07	34.45	3.69	2	2	45.5921	8.06	4	4	28.59	3.69	2	2	434	47.7882	8.68994
	ENSP00000216951	GSS HGNC Symbol|glutathione synthetase [Source:HGNC Symbol;Acc:4624]|20|ENSG00000100983|ENST00000216951	7		0.693803		0.517563	1;-;-	1;-;-		0.766772	1;-;-	11.18	30	7	21	8.39108e+06	136.818	8.02	5	9	79.9986	8.23	5	6	60.0686	4.85	3	6	474	52.3523	5.92236
	ENSP00000410503	LENG4 HGNC (curated)|Lysophospholipid acyltransferase 7 (LPLAT 7)(EC 2.3.1.-)(1-acylglycerophosphatidylinositol O-acyltransferase)(EC 2.3.1.n4)(Lysophosphatidylinositol acyltransferase)(Lyso-PI acyltransferase)(LPIAT)(Leukocyte receptor cluster member 4)(Bladder and breast carcinoma-overexpressed gene 1 protein)(Membrane-bound O-acyltransferase domain-containing protein 7)(O-acyltransferase domai…	6	12.8349	0.616728	14.5735	0.519253	2;2;3	2;2;3	18.8841	0.938725	2;2;3	21.55	4	6	34	3.0095e+07	105.909	21.55	5	10	107.712	14.29	5	11	146.091	21.55	6	13	399	44.7036	8.86572
	ENSP00000378380	FUBP1 HGNC Symbol|far upstream element (FUSE) binding protein 1 [Source:HGNC Symbol;Acc:4004]|ENSG00000162613|1|ENST00000394922	11	6.42689	0.725678	34.9365	0.521644	1;13;17	1;13;17	28.2826	0.724937	1;13;17	27.34	16	12	94	3.26873e+07	84.17	6.36	3	5	465.307	25.76	11	38	796.42	23.53	11	51	629	66.1908	7.56201
	ENSP00000210444	NANS HGNC Symbol|N-acetylneuraminic acid synthase [Source:HGNC Symbol;Acc:19237]|ENSG00000095380|9|ENST00000210444	5		0.652914	6.28682	0.522245	-;4;1	-;4;1	24.8197	0.820342	-;4;1	30.36	1	5	11	2.74664e+07					102.92	30.36	5	5	186.853	15.32	3	6	359	40.2815	6.7417
	ENSP00000228740	LTA4H HGNC Symbol|leukotriene A4 hydrolase [Source:HGNC Symbol;Acc:6710]|12|ENSG00000111144|ENST00000228740	6	46.9105	0.817901	44.7449	0.523647	3;1;1	3;1;1	29.5171	0.644587	3;1;1	11.46	4	6	29	8.29979e+06	250.144	10.31	5	11	152.88	10.31	5	7	175.453	11.46	6	11	611	69.2412	6.17627
	ENSP00000388658	SLC25A12 HGNC Symbol|solute carrier family 25 (mitochondrial carrier, Aralar), member 12 [Source:HGNC Symbol;Acc:10982]|ENSG00000115840|2|ENST00000422440	6		0.494994		0.525329	-;1;-	-;1;-		1.02748	-;1;-	19.32	5	11	35	1.6877e+07	222.187	11.95	8	12	272.676	18.44	10	11	258.512	15.19	9	12	678	74.7149	8.38232
	ENSP00000340184	LIMA1 HGNC Symbol|LIM domain and actin binding 1 [Source:HGNC Symbol;Acc:24636]|ENSG00000050405|12|ENST00000341247	2		0.465289		0.525811	-;-;1	-;-;1		1.08941	-;-;1	5.01	9	4	15	1.30607e+07	31.71	3.82	3	3	32.5828	3.82	3	5	40.2267	5.01	4	7	759	85.1734	6.84424
	ENSP00000361097	MMRN2 HGNC Symbol|multimerin 2 [Source:HGNC Symbol;Acc:19888]|ENSG00000173269|10|ENST00000372027	3		0.51108		0.525953	-;1;-	-;1;-		0.996321	-;1;-	4.53	2	3	9	4.25252e+06					55.4567	4.53	3	4	84.18	4.53	3	5	949	104.344	5.85889
	ENSP00000442820	AHCY HGNC Symbol|adenosylhomocysteinase [Source:HGNC Symbol;Acc:343]|ENSG00000101444|20|ENST00000538132	2		1.00264	56.181	0.526695	-;2;1	-;2;1	3.74189	0.513643	-;2;1	6.93	2	3	20	1.32081e+07	59.0901	6.93	3	7	89.68	6.93	3	8	46.4901	6.93	3	5	404	44.6296	6.46826
	ENSP00000230340	BYSL HGNC Symbol|bystin-like [Source:HGNC Symbol;Acc:1157]|ENSG00000112578|6|ENST00000230340	6		0.526717		0.527674	-;1;-	-;1;-		0.969906	-;1;-	16.02	2	7	14	9.43304e+06	49.7506	10.07	5	6	49.44	13.04	4	4	41.17	7.55	4	4	437	49.57	8.11865
	ENSP00000311747	RBM14 HGNC Symbol|RNA binding motif protein 14 [Source:HGNC Symbol;Acc:14219]|ENSG00000239306|11|ENST00000310137	16		0.472034		0.529026	-;-;1	-;-;1		1.08041	-;-;1	27.06	7	18	128	9.3608e+07	669.331	24.66	17	42	610.121	27.06	18	44	710.595	27.06	17	42	669	69.4489	9.67139
	ENSP00000324549	CYFIP1 HGNC Symbol|cytoplasmic FMR1 interacting protein 1 [Source:HGNC Symbol;Acc:13759]|15|ENSG00000068793|ENST00000313077	8		0.718986		0.532688	1;-;-	1;-;-		0.761538	1;-;-	8.22	11	10	32	3.3821e+07	90.8885	5.51	7	10	58.0583	4.55	6	9	138.536	5.75	8	13	1253	145.089	6.90283
	ENSP00000305480	FEN1 HGNC Symbol|flap structure-specific endonuclease 1 [Source:HGNC Symbol;Acc:3650]|ENSG00000168496|11|ENST00000305885	2		0.736618		0.533389	1;-;-	1;-;-		0.744288	1;-;-	11.84	2	2	2	9.47144e+06	37.47	11.84	2	2									380	42.5661	8.6167
	ENSP00000392282	THUMPD1 HGNC (curated)|THUMP domain-containing protein 1 [Source:UniProtKB/Swiss-Prot;Acc:Q9NXG2]|16|ENSG00000066654|ENST00000431224	4	22.9626	0.588452	10.4322	0.533799	1;1;1	1;1;1	13.1824	0.914102	1;1;1	15.03	3	5	20	1.03093e+07	79.21	10.93	4	7	118.51	12.76	4	6	140.773	12.76	4	7	439	48.5185	8.83643
	ENSP00000379495	CSE1L HGNC Symbol|CSE1 chromosome segregation 1-like (yeast) [Source:HGNC Symbol;Acc:2431]|20|ENSG00000124207|ENST00000396192	7		0.525081		0.537155	1;-;-	1;-;-		1.05151	1;-;-	6.67	4	7	19	1.51597e+07	56.1967	3.5	4	4	42.8587	2.4	3	4	133.681	5.79	6	11	915	103.813	6.11279
	ENSP00000261416	HEXB HGNC Symbol|hexosaminidase B (beta polypeptide) [Source:HGNC Symbol;Acc:4879]|ENSG00000049860|5|ENST00000261416	5		0.469576		0.537819	-;-;1	-;-;1		1.10411	-;-;1	9.71	8	6	38	4.25109e+07	83.31	6.83	4	14	56.8564	8.27	5	11	92.6632	9.71	6	13	556	63.0972	6.75635
	ENSP00000320324	NPEPPS HGNC Symbol|aminopeptidase puromycin sensitive [Source:HGNC Symbol;Acc:7900]|ENSG00000141279|17|ENST00000322157	15	21.459	0.619751	29.3224	0.538433	7;4;9	7;4;9	25.0851	0.839671	7;4;9	25.24	14	16	88	7.40764e+07	445.188	25.24	16	29	368.123	16	12	23	517.853	23.29	15	36	919	103.211	5.71924
	ENSP00000364042	ITGAV HGNC (curated)|Integrin alpha-V Precursor (Vitronectin receptor subunit alpha)(CD51 antigen) [Contains Integrin alpha-V heavy chain;Integrin alpha-V light chain] [Source:UniProtKB/Swiss-Prot;Acc:P06756]|2|ENSG00000138448|ENST00000374907	11	34.1288	0.640059	7.97034	0.539818	4;9;8	4;9;8	29.9264	0.872778	4;9;8	17.59	4	13	73	4.36463e+07	92.04	8.6	6	14	146.434	15.51	12	31	205.884	16.4	12	28	1012	112.187	5.93506
	ENSP00000364585	RCC2 HGNC Symbol|regulator of chromosome condensation 2 [Source:HGNC Symbol;Acc:30297]|ENSG00000179051|1|ENST00000375436	6	18.0279	0.650415	16.4211	0.545061	3;4;4	3;4;4	12.2703	0.723702	3;4;4	15.33	1	6	30	1.96105e+07	35.97	13.22	5	6	206.527	11.11	4	10	110.569	13.22	5	14	522	56.0492	8.77783
	ENSP00000211402	CR925765.1 Clone-based (Ensembl)|Valyl-tRNA synthetase [Source:UniProtKB/Swiss-Prot;Acc:P26640]|ENSG00000096171|HSCHR6_MHC_DBB|ENST00000211402	21	59.1492	0.747349	59.7693	0.545711	1;1;-	1;1;-		0.727007	1;1;-	18.75	12	22	110	3.54365e+07	342.663	15.51	17	33	445.383	14.08	17	40	441.771	15.03	16	37	1264	140.387	7.59131
	ENSP00000430420	ANXA6 HGNC Symbol|annexin A6 [Source:HGNC Symbol;Acc:544]|ENSG00000197043|5|ENST00000521512	2		0.495744		0.548727	-;1;-	-;1;-		1.07162	-;1;-	66.96	3	21	585	4.31633e+08	2309.89	48.04	18	162	2263.34	64.57	20	213	2498.28	60.87	20	210	460	51.7442	6.04932
	ENSP00000264663	NNT HGNC (curated)|NAD(P) transhydrogenase, mitochondrial Precursor (EC 1.6.1.2)(Nicotinamide nucleotide transhydrogenase)(Pyridine nucleotide transhydrogenase) [Source:UniProtKB/Swiss-Prot;Acc:Q13423]|5|ENSG00000112992|ENST00000264663	3		0.664104	10.315	0.549379	-;1;1	-;1;1	25.1453	0.814392	-;1;1	5.25	6	3	6	2.55091e+07					46.94	4.14	2	3	39.5267	5.25	3	3	1086	113.823	8.08936
	ENSP00000432788	PRMT1 HGNC Symbol|protein arginine methyltransferase 1 [Source:HGNC Symbol;Acc:5187]|ENSG00000126457|19|ENST00000526224	3		0.655701		0.551415	-;-;1	-;-;1		0.810693	-;-;1	23.13	11	4	19	6.02087e+07	85.31	14.37	3	6	123.349	11.25	2	5	132.723	23.13	4	8	160	18.2853	6.39209
	ENSP00000419338	TF HGNC Symbol|transferrin [Source:HGNC Symbol;Acc:11740]|3|ENSG00000091513|ENST00000482271	1	118.513	0.449288	114.534	0.55194	4;3;3	4;3;3	13.3425	1.21738	4;3;3	8.21	3	1	18	1.14808e+07	100.29	8.21	1	8	84.31	8.21	1	4	112.91	8.21	1	6	134	14.681	7.13721
	ENSP00000309285	CCDC96 HGNC (curated)|Coiled-coil domain-containing protein 96 [Source:UniProtKB/Swiss-Prot;Acc:Q2M329]|4|ENSG00000173013|ENST00000310085	1		2.34857		0.553181	-;-;2	-;-;2		0.227064	-;-;2	1.26	1	1	5	5.72929e+07									27.77	1.26	1	5	555	62.6726	4.94482
	ENSP00000320295	TUBB3 HGNC (curated)|Tubulin beta-3 chain (Tubulin beta-III)(Tubulin beta-4) [Source:UniProtKB/Swiss-Prot;Acc:Q13509]|16|ENSG00000198211|ENST00000315491	7	13.1734	0.787705	6.43176	0.554355	16;8;14	16;8;14	16.7498	0.684403	16;8;14	71.11	11	14	351	1.29882e+09	2376.47	62.44	13	109	2643.66	61.33	13	111	3028.1	62.44	13	131	450	50.4003	4.93213
	ENSP00000221957	PLIN3 HGNC Symbol|perilipin 3 [Source:HGNC Symbol;Acc:16893]|ENSG00000105355|19|ENST00000221957	9	11.3939	0.681459	47.1657	0.555718	5;2;2	5;2;2	31.5251	0.785611	5;2;2	36.87	1	9	35	2.37867e+07	286.424	30.41	7	12	236.189	19.59	5	11	268.598	22.12	6	12	434	47.0459	5.43994
	ENSP00000417864	ANP32A HGNC Symbol|acidic (leucine-rich) nuclear phosphoprotein 32 family, member A [Source:HGNC Symbol;Acc:13233]|ENSG00000140350|15|ENST00000465139	2		0.766985	9.77081	0.556147	-;2;2	-;2;2	30.8793	0.747132	-;2;2	14.06	4	4	17	3.69654e+07					126.17	14.06	4	7	155.95	14.06	4	10	249	28.5683	4.09424
	ENSP00000259318	AKAP2 HGNC Symbol|A kinase (PRKA) anchor protein 2 [Source:HGNC Symbol;Acc:372]|ENSG00000241978|9|ENST00000259318	6		0.628642	21.4087	0.5564	-;1;2	-;1;2	20.8558	0.854549	-;1;2	9.78	6	6	16	1.2733e+07					143.244	7.1	4	8	84.2359	7.33	5	8	859	94.6028	5.10986
	ENSP00000198939	CHERP HGNC Symbol|calcium homeostasis endoplasmic reticulum protein [Source:HGNC Symbol;Acc:16930]|19|ENSG00000085872|ENST00000198939	4		0.548619		0.557866	-;1;-	-;1;-		0.984465	-;1;-	5.83	2	5	14	1.985e+07	49.18	2.27	2	5	69.82	4.85	4	5	46.94	4.1	3	4	927	104.868	9.18799
	ENSP00000440563	AP2B1 HGNC Symbol|adaptor-related protein complex 2, beta 1 subunit [Source:HGNC Symbol;Acc:563]|17|ENSG00000006125|ENST00000538556	2	52.1484	0.621771	61.1795	0.559498	4;1;-	4;1;-		0.835782	4;1;-	11.36	4	7	82	2.4955e+07	503.267	11.36	7	33	358.162	8.41	6	24	391.69	11.36	7	25	880	98.0557	5.23682
	ENSP00000380722	HRAS HGNC Symbol|v-Ha-ras Harvey rat sarcoma viral oncogene homolog [Source:HGNC Symbol;Acc:5173]|11|ENSG00000174775|ENST00000397594	1		1.11401		0.563198	-;-;1	-;-;1		0.487368	-;-;1	18.82	5	2	2	1.18e+07									21.58	18.82	2	2	170	18.8582	4.99561
	ENSP00000394668	PDCD4 HGNC Symbol|programmed cell death 4 (neoplastic transformation inhibitor) [Source:HGNC Symbol;Acc:8763]|10|ENSG00000150593|ENST00000444997	3		0.60978	85.4928	0.566947	-;1;1	-;1;1	6.53413	0.926537	-;1;1	10.39	3	3	11	1.77738e+06	30.9	10.39	2	3	70.91	10.39	3	4	92.09	10.39	3	4	231	25.1817	5.22412
	ENSP00000421464	SEC31A HGNC Symbol|SEC31 homolog A (S. cerevisiae) [Source:HGNC Symbol;Acc:17052]|ENSG00000138674|4|ENST00000500777	9	23.4754	0.488087	40.0844	0.569561	3;3;3	3;3;3	14.0987	0.951606	3;3;3	10.97	21	10	50	6.55803e+07	233.378	5.25	5	14	321.22	8.43	7	17	352.992	9.28	8	19	1067	117.599	7.38623
	ENSP00000318177	FUBP3 HGNC Symbol|far upstream element (FUSE) binding protein 3 [Source:HGNC Symbol;Acc:4005]|ENSG00000107164|9|ENST00000319725	12		0.589952	0.452	0.57429	-;4;3	-;4;3	4.06954	1.07349	-;4;3	37.24	3	15	49	1.52056e+08	52.5944	9.44	4	5	226.168	25.52	10	20	384.301	33.22	12	24	572	61.6022	8.38232
	ENSP00000254810	H3F3B HGNC (automatic)|Histone H3.3 [Source:UniProtKB/Swiss-Prot;Acc:P84243]|17|ENSG00000132475|ENST00000254810	2	21.1542	0.856208	34.7707	0.575723	3;9;7	3;9;7	24.802	0.649935	3;9;8	83.82	3	10	634	1.88562e+09	2506.2	79.41	9	156	4014.56	83.82	10	243	4239.42	83.82	10	235	136	15.3185	11.2681
	ENSP00000437709	PTGS1 HGNC Symbol|prostaglandin-endoperoxide synthase 1 (prostaglandin G/H synthase and cyclooxygenase) [Source:HGNC Symbol;Acc:9604]|ENSG00000095303|9|ENST00000540753	7		1.44913		0.576462	2;-;-	2;-;-		0.408886	2;-;-	20.3	13	8	38	3.01027e+07	227.012	20.3	8	14	160.412	6.52	4	10	258.522	12.1	6	14	537	61.8892	8.04541
	ENSP00000263377	BRD4 HGNC Symbol|bromodomain containing 4 [Source:HGNC Symbol;Acc:13575]|ENSG00000141867|19|ENST00000263377	2		0.662143		0.576875	1;-;-	1;-;-		0.895508	1;-;-	1.84	8	3	14	7.18682e+08	58.97	1.84	3	4	24.63	1.4	2	3	29.74	1.4	2	7	1362	152.124	9.18799
	ENSP00000353892	ADAM15 HGNC Symbol|ADAM metallopeptidase domain 15 [Source:HGNC Symbol;Acc:193]|ENSG00000143537|1|ENST00000360674	7	46.0475	0.445766	55.3085	0.577766	1;1;1	1;1;1	12.9722	1.24715	1;1;1	12.56	12	7	37	8.1577e+06	259.397	9.97	6	14	177.45	9.97	6	10	262.716	12.56	7	13	772	83.61	6.39209
	ENSP00000266479	DNM1L HGNC Symbol|dynamin 1-like [Source:HGNC Symbol;Acc:2973]|ENSG00000087470|12|ENST00000266479	6	20.5658	0.82891	19.4441	0.577959	1;1;1	1;1;1	4.12731	0.688997	1;1;1	14.26	17	7	36	9.25854e+06	165.85	12.35	6	10	79.4833	14.26	7	12	91.81	14.26	7	14	575	64.137	7.89893
	ENSP00000386153	RAP1GDS1 HGNC Symbol|RAP1, GTP-GDP dissociation stimulator 1 [Source:HGNC Symbol;Acc:9859]|4|ENSG00000138698|ENST00000408927	6		0.632809		0.57816	1;-;-	1;-;-		0.939107	1;-;-	14.83	10	6	15	1.10002e+07	82.13	8.9	4	5	66.7767	6.1	3	4	86.13	14.83	6	6	607	66.2745	5.31299
	ENSP00000420957	NSUN2 HGNC Symbol|NOP2/Sun domain family, member 2 [Source:HGNC Symbol;Acc:25994]|ENSG00000037474|5|ENST00000506139	6	25.4966	0.913106	17.8645	0.579564	1;1;1	1;1;1	10.3983	0.636169	1;1;1	12.43	3	7	29	1.09882e+07	117.732	9.97	6	10	83.3455	12.43	7	9	97.48	11.75	6	10	732	82.3407	7.00537
	ENSP00000283195	RANBP2 HGNC Symbol|RAN binding protein 2 [Source:HGNC Symbol;Acc:9848]|2|ENSG00000153201|ENST00000283195	3		0.482655	9.09892	0.581164	-;1;1	-;1;1	0.569466	1.16312	-;1;1	2.95	9	10	32	6.96953e+07	176.026	1.61	5	10	133.932	2.08	7	9	158.887	2.54	8	13	3224	357.974	6.20166
	ENSP00000280591	TRNT1 HGNC Symbol|tRNA nucleotidyl transferase, CCA-adding, 1 [Source:HGNC Symbol;Acc:17341]|3|ENSG00000072756|ENST00000280591	3	7.77631	0.761185	5.67583	0.584228	2;1;-	2;1;-		0.767829	2;1;-	10.14	2	5	13	1.28469e+07	28.31	7.25	3	4	32.0007	8.21	4	6	29.31	2.9	2	3	414	47.7989	8.48486
	ENSP00000262803	UPF1 HGNC Symbol|UPF1 regulator of nonsense transcripts homolog (yeast) [Source:HGNC Symbol;Acc:9962]|ENSG00000005007|19|ENST00000262803	9		0.587736	37.7916	0.58559	-;2;2	-;2;2	9.53437	0.94994	-;2;2	8.41	6	9	46	2.38787e+07	91.4667	6.08	6	13	117.933	7.87	8	16	192.739	7.25	8	17	1118	122.958	6.68311
	ENSP00000375975	TMCO1 HGNC Symbol|transmembrane and coiled-coil domains 1 [Source:HGNC Symbol;Acc:18188]|1|ENSG00000143183|ENST00000392129	1		0.741238		0.586112	-;-;1	-;-;1		0.762266	-;-;1	11.24	2	1	1	4.34242e+06									25.85	11.24	1	1	169	18.8069	9.68604
	ENSP00000264597	SPCS3 HGNC (automatic)|Signal peptidase complex subunit 3 (EC 3.4.-.-)(Microsomal signal peptidase 23 kDa subunit)(SPase 22 kDa subunit)(SPC22/23) [Source:UniProtKB/Swiss-Prot;Acc:P61009]|4|ENSG00000129128|ENST00000264597	1	15.7781	1.04166	10.7071	0.588335	1;4;4	1;4;4	7.53893	0.585984	1;4;4	11.11	1	2	17	2.6656e+07	45.63	7.22	1	3	149.955	7.22	1	8	125.06	11.11	2	6	180	20.3005	8.6167
	ENSP00000252804	PXDN HGNC Symbol|peroxidasin homolog (Drosophila) [Source:HGNC Symbol;Acc:14966]|ENSG00000130508|2|ENST00000252804	18		1.17638		0.590861	-;1;-	-;1;-		0.486272	-;1;-	15.75	28	19	67	2.53193e+07	344.071	13.46	17	26	442.67	14.13	17	26	201.21	7.91	10	15	1479	165.17	7.1665
	ENSP00000371143	FKBP1A HGNC Symbol|FK506 binding protein 1A, 12kDa [Source:HGNC Symbol;Acc:3711]|ENSG00000088832|20|ENST00000381724	3		1.6911	0.989114	0.591557	-;3;2	-;3;2	66.1378	0.435194	-;3;2	49.51	5	3	19	9.50365e+07					248.42	49.51	3	9	350.004	49.51	3	10	103	11.4168	9.11475
	ENSP00000423496	SLC9B2 HGNC Symbol|solute carrier family 9, subfamily B (cation proton antiporter 2), member 2 [Source:HGNC Symbol;Acc:25143]|4|ENSG00000164038|ENST00000508136	1		0.967099		0.592563	-;1;-	-;1;-		0.593205	-;1;-	5.36	2	1	1	3.31756e+06					35.18	5.36	1	1					112	12.3673	7.6792
	ENSP00000304467	THOP1 HGNC Symbol|thimet oligopeptidase 1 [Source:HGNC Symbol;Acc:11793]|19|ENSG00000172009|ENST00000307741	2	18.6329	0.582372		0.594122	1;-;1	1;-;1	19.974	1.03392	1;-;1	3.34	2	2	4	5.9738e+06	20.15	0.87	1	1	31.17	2.47	1	1	41.18	3.34	2	2	689	78.7895	6.04932
	ENSP00000193403	ACTN1 HGNC (automatic)|Alpha-actinin-1 (Alpha-actinin cytoskeletal isoform)(Non-muscle alpha-actinin-1)(F-actin cross-linking protein) [Source:UniProtKB/Swiss-Prot;Acc:P12814]|14|ENSG00000072110|ENST00000193403	14	12.0713	0.752601	19.4141	0.598401	26;23;31	26;23;31	9.93514	0.7403	26;23;31	50.56	11	30	766	3.16577e+08	4061.46	46.97	29	234	3937.08	50.56	29	260	4676.82	50.56	30	272	892	102.993	5.41455
	ENSP00000365042	CSNK2B HGNC Symbol|casein kinase 2, beta polypeptide [Source:HGNC Symbol;Acc:2460]|ENSG00000204435|6|ENST00000375882	1		1.12343		0.59962	-;-;1	-;-;1		0.514533	-;-;1	16.74	3	2	2	2.92899e+07									23.78	16.74	2	2	215	24.926	5.5542
	ENSP00000333277	HIST2H3D HGNC (curated)|Histone H3.2 (H3/m)(H3/o) [Source:UniProtKB/Swiss-Prot;Acc:Q71DI3]|1|ENSG00000183598|ENST00000331491	1	15.1093	0.895396	33.3077	0.602884	1;5;3	1;5;3	17.3725	0.837412	1;5;3	83.82	3	10	644	1.88562e+09	2747.53	79.41	9	158	4546.53	83.82	10	250	4738.01	83.82	10	236	136	15.3785	11.2681
	ENSP00000445500	ATAD1 HGNC Symbol|ATPase family, AAA domain containing 1 [Source:HGNC Symbol;Acc:25903]|10|ENSG00000138138|ENST00000541004	1		0.837651		0.60293	-;-;1	-;-;1		0.693884	-;-;1	3.83	2	1	1	6.77353e+06									26.11	3.83	1	1	287	32.3872	9.36377
	ENSP00000359151	DBT HGNC Symbol|dihydrolipoamide branched chain transacylase E2 [Source:HGNC Symbol;Acc:2698]|1|ENSG00000137992|ENST00000370132	2		0.604202		0.603151	-;-;1	-;-;1		0.962338	-;-;1	3.73	3	2	5	3.68879e+06	33.35	1.87	1	2	42.87	1.87	1	1	65.33	3.73	2	2	482	53.4829	8.51416
	ENSP00000343966	PSPC1 HGNC Symbol|paraspeckle component 1 [Source:HGNC Symbol;Acc:20320]|ENSG00000121390|13|ENST00000338910	12		0.5974	12.0326	0.603197	-;7;7	-;7;7	8.85615	0.93595	-;7;7	26	29	16	136	4.59044e+07	104.81	11.66	9	18	244.771	24.86	15	55	192.901	26	16	63	523	58.7062	6.66846
	ENSP00000410465	HMGB1 HGNC Symbol|high-mobility group box 1 [Source:HGNC Symbol;Acc:4983]|ENSG00000189403|13|ENST00000398908	3		0.689382	0.286814	0.603637	-;3;3	-;3;3	26.4135	0.938523	-;3;3	89.69	6	4	16	4.17917e+07					162.92	61.86	3	8	118.82	89.69	4	8	97	11.3448	9.89111
	ENSP00000369703	TUBB2A HGNC (automatic)|Tubulin beta-2A chain [Source:UniProtKB/Swiss-Prot;Acc:Q13885]|6|ENSG00000137267|ENST00000333628	3	25.1616	0.69881	26.6387	0.604077	2;1;2	2;1;2	14.7527	0.859429	2;1;2	62.02	4	14	436	1.51462e+09	2445.86	56.63	13	133	2709.91	56.63	12	141	3289.78	54.16	13	162	445	49.875	4.89404
	ENSP00000373883	USP5 HGNC Symbol|ubiquitin specific peptidase 5 (isopeptidase T) [Source:HGNC Symbol;Acc:12628]|ENSG00000111667|12|ENST00000389231	15	24.4455	0.767213	8.83188	0.604477	6;7;10	6;7;10	19.0056	0.833942	6;7;10	23.35	3	16	64	1.64894e+07	117.62	14.01	10	14	167.124	20.6	13	21	286.792	19.16	14	29	835	93.2484	5.08447
	ENSP00000424874	PGM3 HGNC Symbol|phosphoglucomutase 3 [Source:HGNC Symbol;Acc:8907]|6|ENSG00000013375|ENST00000513973	6		0.774919		0.604489	1;-;-	1;-;-		0.80181	1;-;-	16.42	10	6	14	6.89829e+06	71.7448	7.93	4	4	53.6448	5.54	3	3	112.788	12.36	4	7	542	59.8143	6.25244
	ENSP00000363899	NIPSNAP3A HGNC Symbol|nipsnap homolog 3A (C. elegans) [Source:HGNC Symbol;Acc:23619]|9|ENSG00000136783|ENST00000374767	7		0.671823	12.1219	0.606043	-;3;2	-;3;2	7.97665	0.869989	-;3;2	37.65	3	7	16	2.21579e+07	56.49	5.26	1	2	105.81	33.6	6	8	138.28	24.29	5	6	247	28.4485	9.15869
	ENSP00000350219	IPO5 HGNC (curated)|Importin-5 (Imp5)(Importin subunit beta-3)(Karyopherin beta-3)(Ran-binding protein 5)(RanBP5) [Source:UniProtKB/Swiss-Prot;Acc:O00410]|13|ENSG00000065150|ENST00000357602	5		0.532563		0.606517	1;-;-	1;-;-		1.17061	1;-;-	5.1	18	5	31	1.83539e+07	129.043	5.1	5	10	123.433	4.01	4	10	201.19	4.01	4	11	1097	123.55	4.94482
	ENSP00000216714	APEX1 HGNC Symbol|APEX nuclease (multifunctional DNA repair enzyme) 1 [Source:HGNC Symbol;Acc:587]|ENSG00000100823|14|ENST00000216714	9	42.9228	0.777528	26.1188	0.608156	6;3;12	6;3;12	23.9756	0.790042	6;3;12	35.53	8	10	51	3.86859e+07	86.64	13.84	3	8	101.86	20.75	5	8	244.78	31.13	8	35	318	35.5322	8.11865
	ENSP00000349687	GM2A HGNC Symbol|GM2 ganglioside activator [Source:HGNC Symbol;Acc:4367]|5|ENSG00000196743|ENST00000357164	1		0.490011	8.78869	0.609835	-;1;1	-;1;1	7.37821	1.2098	-;1;1	5.7	1	1	3	5.35763e+06					30.65	5.7	1	1	54.76	5.7	1	2	193	20.8247	5.31299
	ENSP00000385942	XPO1 HGNC Symbol|exportin 1 (CRM1 homolog, yeast) [Source:HGNC Symbol;Acc:12825]|2|ENSG00000082898|ENST00000404992	4	29.5352	0.448658	26.4135	0.610033	1;1;1	1;1;1	4.17037	1.34942	1;1;1	5.6	9	5	20	1.55161e+07	30.97	3.45	3	5	50.5	3.45	3	6	61.5629	5.6	5	9	1071	123.306	6.06201
	ENSP00P00921	MGI (curated)|Carbonic anhydrase 2 OS=Bos taurus GN=CA2 PE=1 SV=3 - [CAH2_BOVIN]	7	51.6316	1.26761	32.4655	0.610045	49;70;65	51;70;66	22.6926	0.500447	52;71;67	53.08	1	7	988	6.07829e+09	3469.45	53.08	7	233	5602.9	53.08	7	374	5803.54	53.08	7	381	260	29.0957	6.91748
	ENSP00000348871	BAX HGNC Symbol|BCL2-associated X protein [Source:HGNC Symbol;Acc:959]|ENSG00000087088|19|ENST00000356483	3		0.742782		0.610833	-;2;-	-;2;-		0.796165	-;2;-	26.22	4	3	9	2.16315e+07					44.6067	23.17	2	4	55.87	26.22	3	5	164	18.1171	8.1626
	ENSP00000321259	TALDO1 HGNC Symbol|transaldolase 1 [Source:HGNC Symbol;Acc:11559]|ENSG00000177156|11|ENST00000319006	6	36.9477	0.658804	23.8177	0.612132	7;10;13	7;10;13	29.2718	0.90561	7;10;13	27.89	2	6	107	7.18753e+07	348.622	5.64	2	20	482.664	27.89	6	27	869.743	27.89	6	60	337	37.5165	6.81494
	ENSP00000443463	PLBD2 HGNC Symbol|phospholipase B domain containing 2 [Source:HGNC Symbol;Acc:27283]|ENSG00000151176|12|ENST00000545182	4		0.653098	17.2875	0.612555	-;2;3	-;2;3	5.00531	0.899765	-;2;3	7.72	2	4	17	1.27366e+07	32.0267	2.33	2	5	71.7113	7.72	4	5	119	6.82	3	7	557	61.8452	6.80029
	ENSP00000365572	NME2 HGNC Symbol|non-metastatic cells 2, protein (NM23B) expressed in [Source:HGNC Symbol;Acc:7850]|ENSG00000011052|17|ENST00000376392	6	23.2176	0.97781	27.6684	0.61291	19;13;24	19;13;24	14.0829	0.60271	19;13;24	43.45	9	6	107	1.91159e+08	294.876	40.45	5	30	564.075	43.45	6	29	650.112	43.45	6	48	267	30.1176	8.92432
	ENSP00000405455	TKT HGNC (curated)|Transketolase (TK)(EC 2.2.1.1) [Source:UniProtKB/Swiss-Prot;Acc:P29401]|3|ENSG00000163931|ENST00000423525	17	36.7334	0.714779	32.375	0.614118	54;61;60	54;61;60	24.8541	0.847046	54;61;60	46.71	7	17	517	2.64968e+08	2933.99	46.71	17	152	2986.85	46.71	17	176	3886.72	46.71	17	189	623	67.8347	7.66455
	ENSP00000359146	RTCD1 HGNC Symbol|RNA terminal phosphate cyclase domain 1 [Source:HGNC Symbol;Acc:17981]|ENSG00000137996|1|ENST00000370128	2		0.420977		0.615203	-;-;1	-;-;1		1.40878	-;-;1	7.65	3	3	6	1.4132e+07					36.17	5.19	2	3	53.5345	7.65	3	3	366	39.3114	7.85498
	ENSP00000222124	TMEM205 HGNC (automatic)|Transmembrane protein 205 [Source:UniProtKB/Swiss-Prot;Acc:Q6UW68]|19|ENSG00000105518|ENST00000222124	5		0.772806	14.8889	0.617521	-;1;2	-;1;2	9.68952	0.770066	-;1;2	27.51	1	5	13	2.99031e+07	67.89	14.29	2	3	58.92	16.93	3	5	89.4133	24.87	4	5	189	21.1839	8.6167
	ENSP00000357075	TAGLN2 HGNC Symbol|transgelin 2 [Source:HGNC Symbol;Acc:11554]|ENSG00000158710|1|ENST00000320307	6		1.15749	25.3892	0.618461	-;3;2	-;3;2	27.7887	0.568011	-;3;2	51.26	3	6	15	4.65139e+07					137.082	51.26	6	7	171.394	51.26	6	8	199	22.3772	8.25049
	ENSP00000293217	ACOX1 HGNC Symbol|acyl-CoA oxidase 1, palmitoyl [Source:HGNC Symbol;Acc:119]|ENSG00000161533|17|ENST00000293217	10	32.6281	1.33689	1.66688	0.619871	4;2;-	4;2;-		0.480221	4;2;-	32.27	4	11	41	2.73621e+07	193.698	24.55	8	21	130.24	19.85	8	10	86.5946	10.76	5	10	660	74.6201	7.62061
	ENSP00000398675	ALDH16A1 HGNC Symbol|aldehyde dehydrogenase 16 family, member A1 [Source:HGNC Symbol;Acc:28114]|ENSG00000161618|19|ENST00000433981	6		0.662311		0.620339	1;-;-	1;-;-		0.962735	1;-;-	13.19	4	6	14	9.11057e+06	55.74	9.89	4	5	99.8133	5.49	2	3	83	10.99	5	6	637	66.8535	6.84424
	ENSP00000356448	TPR HGNC (curated)|Nucleoprotein TPR [Source:UniProtKB/Swiss-Prot;Acc:P12270]|1|ENSG00000047410|ENST00000367478	30		0.560986	8.59874	0.62202	-;10;13	-;10;13	15.3233	1.04809	-;10;13	19.17	1	33	156	3.72179e+07	591.028	6.52	13	26	1147.33	15.83	28	66	1091.19	18.28	30	64	2363	267.131	5.021
	ENSP00000267950	ETFA HGNC Symbol|electron-transfer-flavoprotein, alpha polypeptide [Source:HGNC Symbol;Acc:3481]|ENSG00000140374|15|ENST00000267950	2		0.969396	0.975591	0.624757	-;2;3	-;2;3	18.7278	0.634124	-;2;3	17.12	7	4	31	4.70811e+07	101.413	9.91	3	5	258.697	17.12	4	13	226.604	17.12	4	13	333	35.0576	8.38232
	ENSP00000456489	HEXA HGNC Symbol|hexosaminidase A (alpha polypeptide) [Source:HGNC Symbol;Acc:4878]|15|ENSG00000213614|ENST00000567159	3		1.96583		0.625654	1;-;-	1;-;-		0.327136	1;-;-	8.84	6	5	25	3.01959e+07	94.2463	8.84	5	9	51.8766	5.7	4	7	107.393	8.84	5	9	509	58.4032	5.24951
	ENSP00000449166	SLC25A3 HGNC Symbol|solute carrier family 25 (mitochondrial carrier; phosphate carrier), member 3 [Source:HGNC Symbol;Acc:10989]|12|ENSG00000075415|ENST00000548847	4	20.4429	0.664653	19.6181	0.628244	5;6;5	5;6;5	14.054	0.911185	5;6;5	22.22	6	4	42	2.03757e+08	175.741	22.22	4	13	299.27	22.22	4	18	154.515	22.22	4	11	324	36.1376	9.26123
	ENSP00000455777	CNN2 HGNC Symbol|calponin 2 [Source:HGNC Symbol;Acc:2156]|19|ENSG00000064666|ENST00000562075	1		0.825004		0.630149	-;-;2	-;-;2		0.736327	-;-;2	6.6	5	1	2	1.35784e+07									21.87	6.6	1	2	212	23.0947	8.5874
	ENSP00000272233	RHOB HGNC Symbol|ras homolog gene family, member B [Source:HGNC Symbol;Acc:668]|2|ENSG00000143878|ENST00000272233	4		0.822674	2.87771	0.630341	-;1;2	-;1;2	7.89573	0.743257	-;1;2	19.9	4	4	5	5.84484e+06					32.72	13.27	2	2	25.3	10.71	3	3	196	22.1091	5.23682
	ENSP00000350387	HYAL2 HGNC Symbol|hyaluronoglucosaminidase 2 [Source:HGNC Symbol;Acc:5321]|ENSG00000068001|3|ENST00000357750	10	43.538	0.433751	58.2553	0.634675	2;1;2	2;1;2	20.8424	1.40123	2;1;2	28.12	3	11	65	9.20545e+07	127.735	18.18	9	18	121.104	20.08	9	22	129.502	28.12	11	25	473	53.826	8.19189
	ENSP00000263368	BLVRB HGNC Symbol|biliverdin reductase B (flavin reductase (NADPH)) [Source:HGNC Symbol;Acc:1063]|19|ENSG00000090013|ENST00000263368	3		0.712279	10.0758	0.635716	-;1;1	-;1;1	16.4687	0.866923	-;1;1	22.33	1	3	6	1.28623e+07					68.03	13.11	2	3	68.2567	22.33	3	3	206	22.1054	7.6499
	ENSP00000302873	GPS1 HGNC Symbol|G protein pathway suppressor 1 [Source:HGNC Symbol;Acc:4549]|17|ENSG00000169727|ENST00000306823	5	25.174	0.533103	6.04925	0.636889	1;1;2	1;1;2	20.8549	1.21876	1;1;2	13.85	3	6	28	1.81713e+07	76.4886	10.18	4	9	97.0147	11.61	5	7	127.629	13.85	6	12	491	55.5012	6.7417
	ENSP00000352834	MYO1C HGNC Symbol|myosin IC [Source:HGNC Symbol;Acc:7597]|ENSG00000197879|17|ENST00000359786	1		0.706403		0.638883	-;1;-	-;1;-		0.875609	-;1;-	48.92	7	38	305	1.02417e+08	1009.35	38.85	30	86	1488.16	42.14	34	115	1489.44	36.22	31	104	1063	121.606	9.40771
	ENSP00000222399	LAMB1 HGNC Symbol|laminin, beta 1 [Source:HGNC Symbol;Acc:6486]|ENSG00000091136|7|ENST00000222399	13		0.694122	6.92261	0.639145	-;4;4	-;4;4	6.20564	0.814496	-;4;4	11.2	5	13	55	4.22114e+07	126.82	6.89	8	12	215.625	8.23	11	24	229.845	6.16	9	19	1786	197.909	4.94482
	ENSP00000335427	POFUT2 HGNC Symbol|protein O-fucosyltransferase 2 [Source:HGNC Symbol;Acc:14683]|21|ENSG00000186866|ENST00000334538	6		0.659642		0.639346	1;-;-	1;-;-		0.996247	1;-;-	15.53	4	6	17	8.49409e+06	37.52	13.68	5	6	51.95	13.95	5	7	42.9172	10	4	4	380	44.0554	6.48096
	ENSP00000351410	PRKAR1A HGNC Symbol|protein kinase, cAMP-dependent, regulatory, type I, alpha (tissue specific extinguisher 1) [Source:HGNC Symbol;Acc:9388]|ENSG00000108946|17|ENST00000358598	8	30.8356	1.07126	32.7486	0.641104	7;6;7	7;6;7	7.61209	0.60533	7;6;7	30.18	3	9	60	4.43917e+07	205.559	23.1	7	18	265.596	30.18	9	22	276.771	23.1	7	20	381	42.955	5.35107
	ENSP00000261313	PEBP1 HGNC Symbol|phosphatidylethanolamine binding protein 1 [Source:HGNC Symbol;Acc:8630]|ENSG00000089220|12|ENST00000261313	5		1.28518	5.39838	0.642713	-;4;5	-;4;5	12.2928	0.517409	-;4;5	36.9	2	5	13	2.42831e+07					32.47	25.13	4	5	67.5943	36.9	5	8	187	21.0437	7.53271
	ENSP00000418354	NDUFB5 HGNC Symbol|NADH dehydrogenase (ubiquinone) 1 beta subcomplex, 5, 16kDa [Source:HGNC Symbol;Acc:7700]|3|ENSG00000136521|ENST00000482604	2		0.662165	5.71835	0.642727	-;1;1	-;1;1	5.32982	0.937629	-;1;1	10.19	5	7	29	2.05915e+07					54.0067	9.71	5	12	44.04	10.19	7	17	206	23.5294	9.59814
	ENSP00000378355	POR HGNC Symbol|P450 (cytochrome) oxidoreductase [Source:HGNC Symbol;Acc:9208]|7|ENSG00000127948|ENST00000394893	10	27.7497	0.696782	16.7548	0.643319	3;2;6	3;2;6	7.89534	0.959499	3;2;6	22.91	15	11	30	1.43584e+07	93.536	12.64	7	9	107.797	8.69	6	9	126.715	18.96	10	12	633	71.5988	5.5542
	ENSP00000377532	PC HGNC Symbol|pyruvate carboxylase [Source:HGNC Symbol;Acc:8636]|ENSG00000173599|11|ENST00000393960	1	49.414	1.23993	30.1624	0.644679	4;5;6	4;5;6	21.6375	0.546782	4;5;6	2.97	26	6	81	7.12871e+07	29.6015	2.04	4	22	0	2.46	5	27	30.1108	2.97	6	32	1178	129.551	6.84424
	ENSP00000351209	EPHA2 HGNC Symbol|EPH receptor A2 [Source:HGNC Symbol;Acc:3386]|1|ENSG00000142627|ENST00000358432	8	54.3551	0.543942	56.3708	0.646686	2;3;3	2;3;3	11.2052	1.26205	2;3;3	9.84	1	8	24	7.99018e+06	23.27	3.48	4	5	30.77	4.71	4	7	92.9086	8.81	7	12	976	108.197	6.22705
	ENSP00000323889	TRIM25 HGNC Symbol|tripartite motif containing 25 [Source:HGNC Symbol;Acc:12932]|17|ENSG00000121060|ENST00000316881	2		0.678977		0.646722	-;-;2	-;-;2		0.918218	-;-;2	5.24	1	2	4	5.67719e+06									29.4333	5.24	2	4	630	70.9277	8.08936
	ENSP00000400407	UBXN4 HGNC Symbol|UBX domain protein 4 [Source:HGNC Symbol;Acc:14860]|ENSG00000144224|2|ENST00000430594	3		0.604299	8.1726	0.646737	-;1;1	-;1;1	18.0257	1.04342	-;1;1	11.22	2	5	7	7.23059e+06					0	2.65	2	2	59.77	11.22	5	5	490	55.0219	6.94678
	ENSP00000372411	CTBP1 HGNC Symbol|C-terminal binding protein 1 [Source:HGNC Symbol;Acc:2494]|ENSG00000159692|4|ENST00000382952	6		0.807559		0.648306	-;1;-	-;1;-		0.777226	-;1;-	23.78	18	9	68	2.25804e+07	377.044	15.15	6	21	420.03	22.38	8	25	325.79	15.85	7	22	429	46.3758	6.65381
	ENSP00000338413	UBA1 HGNC (curated)|Ubiquitin-like modifier-activating enzyme 1 (Ubiquitin-activating enzyme E1)(Protein A1S9) [Source:UniProtKB/Swiss-Prot;Acc:P22314]|X|ENSG00000130985|ENST00000335972	15	27.8092	0.735977	10.9224	0.650538	10;5;9	10;5;9	15.4834	0.920228	10;5;9	26.47	7	17	208	1.11152e+08	1696.64	22.59	13	73	1425.16	20.79	13	64	1880.03	24.29	15	71	1058	117.774	5.75732
	ENSP00000366629	AC145291.1 Clone-based (Ensembl)|KM-PA-2 protein [Source:UniProtKB/TrEMBL;Acc:Q96Q25]|ENSG00000204775|8|ENST00000377412	10		0.778333		0.650675	-;-;1	-;-;1		0.805901	-;-;1	18.93	6	10	43	1.36586e+07	128.567	16.4	8	17	84.1737	14.67	7	13	64.4615	16.25	8	13	634	71.885	8.17725
	ENSP00000444277	GTPBP4 HGNC Symbol|GTP binding protein 4 [Source:HGNC Symbol;Acc:21535]|ENSG00000107937|10|ENST00000538293	9	29.9223	0.696313	20.3553	0.652347	3;3;3	3;3;3	6.78482	0.904758	3;3;3	26.25	5	10	46	1.94174e+07	220.941	25.1	9	16	82.8541	19.31	7	18	139.74	18.34	7	12	518	60.0134	9.39307
	ENSP00000355086	DARS2 HGNC Symbol|aspartyl-tRNA synthetase 2, mitochondrial [Source:HGNC Symbol;Acc:25538]|ENSG00000117593|1|ENST00000361951	4		0.141488		0.65307	1;-;-	1;-;-		2.88433	1;-;1	10.85	23	6	37	1.52243e+07	49.2594	4.5	4	11	52.399	2.79	3	11	81.3175	10.85	6	15	645	73.5161	8.01611
	ENSP00000219481	DECR2 HGNC Symbol|2,4-dienoyl CoA reductase 2, peroxisomal [Source:HGNC Symbol;Acc:2754]|16|ENSG00000242612|ENST00000219481	4		0.694323	17.0241	0.654421	-;1;1	-;1;1	12.8185	0.908144	-;1;1	15.07	5	4	9	6.2903e+06					80.18	15.07	4	5	30.64	9.25	3	4	292	30.758	9.21729
	ENSP00000301764	DDB1 HGNC Symbol|damage-specific DNA binding protein 1, 127kDa [Source:HGNC Symbol;Acc:2717]|11|ENSG00000167986|ENST00000301764	9	55.2014	0.841598	24.2645	0.65453	3;2;-	3;2;-		0.84837	3;2;-	11.75	12	9	49	6.20952e+07	116.568	10.09	8	18	156.721	8.6	7	16	129.732	8.86	7	15	1140	126.887	5.26221
	ENSP00000353114	AHNAK2 HGNC (automatic)|Protein AHNAK2 [Source:UniProtKB/Swiss-Prot;Acc:Q8IVF2]|14|ENSG00000185567|ENST00000333244	5	32.5422	0.560519	32.0291	0.654952	1;1;-	1;1;-		1.16731	1;1;-	3.05	1	8	21	1.13832e+07	43.94	1.93	3	5	41.76	2.26	5	7	72.8317	2.28	6	9	5795	616.242	5.36377
	ENSP00000246548	UBA2 HGNC Symbol|ubiquitin-like modifier activating enzyme 2 [Source:HGNC Symbol;Acc:30661]|ENSG00000126261|19|ENST00000246548	9	22.8664	0.759783	7.76533	0.656501	2;5;7	2;5;7	26.6295	0.858993	2;5;7	24.38	3	10	39	1.87314e+07	125.585	14.84	6	9	188.555	20	9	14	215.487	18.91	7	16	640	71.1792	5.2876
	ENSP00000262238	YY1 HGNC Symbol|YY1 transcription factor [Source:HGNC Symbol;Acc:12856]|14|ENSG00000100811|ENST00000262238	2		0.728749	12.5356	0.657058	-;3;6	-;3;6	10.4416	0.864956	-;3;6	4.35	2	2	14	1.54533e+06					63.76	4.35	2	4	113.788	4.35	2	10	414	44.6847	6.25244
	ENSP00000260385	FAM82A2 HGNC (curated)|Regulator of microtubule dynamics protein 3 (RMD-3)(hRMD-3)(Protein FAM82A2)(Protein FAM82C)(Protein tyrosine phosphatase-interacting protein 51)(TCPTP-interacting protein 51)(Cerebral protein 10) [Source:UniProtKB/Swiss-Prot;Acc:Q96TC7]|15|ENSG00000137824|ENST00000260385	6		0.582701	23.9805	0.658027	-;1;1	-;1;1	5.42799	1.08577	-;1;1	13.19	5	7	17	8.15534e+06	139.854	4.89	3	6	63.936	11.91	6	6	71.6567	7.23	4	5	470	52.086	5.09717
	ENSP00000301284	AC011498.1 Clone-based (Ensembl)|Hepatoma-derived growth factor-related protein 2 [Source:UniProtKB/Swiss-Prot;Acc:Q7Z4V5]|ENSG00000167674|19|ENST00000301284	5		0.616405	2.42541	0.658157	-;3;4	-;3;4	2.95447	0.995606	-;3;4	12.72	2	7	21	8.5982e+06					36.06	5.33	3	7	38.6533	10.06	6	14	676	74.7715	6.94678
	ENSP00000446184	RRP12 HGNC Symbol|ribosomal RNA processing 12 homolog (S. cerevisiae) [Source:HGNC Symbol;Acc:29100]|ENSG00000052749|10|ENST00000536831	9		0.870286		0.658669	1;-;-	1;-;-		0.777938	1;-;-	12.71	4	12	35	4.458e+07	45.1178	9.16	9	13	64.5451	3.55	5	8	122.628	7.88	9	14	1015	112.965	8.68994
	ENSP00000437723	CRIP2 HGNC Symbol|cysteine-rich protein 2 [Source:HGNC Symbol;Acc:2361]|14|ENSG00000182809|ENST00000538259	3		0.770054	7.02292	0.659548	-;1;3	-;1;3	26.9735	0.850808	-;1;3	30.21	3	4	26	3.62163e+07	85.01	8.33	1	4	242.354	14.06	2	9	252.396	30.21	4	13	192	20.6971	8.93896
	ENSP00000362946	RAB14 HGNC (curated)|Ras-related protein Rab-14 [Source:UniProtKB/Swiss-Prot;Acc:P61106]|9|ENSG00000119396|ENST00000373840	3		0.885506	14.5261	0.659996	-;2;1	-;2;1	3.51332	0.718537	-;2;1	20.93	2	3	14	1.92825e+07	31.42	10.7	2	2	78.7143	20.93	3	7	51.12	20.93	3	5	215	23.8819	6.21436
	ENSP00000341917	ENG HGNC Symbol|endoglin [Source:HGNC Symbol;Acc:3349]|ENSG00000106991|9|ENST00000344849	10	21.8561	0.622312	6.58632	0.660766	14;5;9	14;5;9	9.92051	0.992183	14;5;9	31.2	3	12	143	8.35936e+07	777.391	24.16	10	49	690.67	25.28	11	44	860.543	26.72	10	50	625	67.4987	6.56592
	ENSP00000346174	HCFC1 HGNC Symbol|host cell factor C1 (VP16-accessory protein) [Source:HGNC Symbol;Acc:4839]|ENSG00000172534|X|ENST00000354233	2		0.405242		0.660929	-;1;-	-;1;-		1.579	-;1;-	1.73	4	4	24	2.06032e+07	33.3177	1.12	3	4	59.8541	1.32	3	8	110.686	1.73	4	12	1966	201.724	7.45947
	ENSP00000346173	ETFB HGNC Symbol|electron-transfer-flavoprotein, beta polypeptide [Source:HGNC Symbol;Acc:3482]|ENSG00000105379|19|ENST00000354232	5		1.03039	0.0851634	0.661143	-;2;3	-;2;3	22.5616	0.652803	-;2;3	17.05	2	6	31	3.55564e+07	63.08	7.51	3	7	212.011	15.03	5	12	222.297	11.27	4	12	346	37.411	7.1665
	ENSP00000314949	POLR2A HGNC Symbol|polymerase (RNA) II (DNA directed) polypeptide A, 220kDa [Source:HGNC Symbol;Acc:9187]|17|ENSG00000181222|ENST00000322644	8		0.636817		0.661335	-;-;1	-;-;1		1.00113	-;-;1	9.29	10	14	63	2.05651e+07	127.101	6.7	10	16	128.397	6.4	10	23	122.166	7.16	12	24	1970	217.039	7.37158
	ENSP00000399768	DDT HGNC Symbol|D-dopachrome tautomerase [Source:HGNC Symbol;Acc:2732]|ENSG00000099977|22|ENST00000430101	1		1.06715		0.663283	-;1;-	-;1;-		0.601747	-;1;-	14.02	5	1	2	1.59855e+07					29.6	14.02	1	2					107	11.3158	6.27783
	ENSP00000422639	TMEM165 HGNC Symbol|transmembrane protein 165 [Source:HGNC Symbol;Acc:30760]|4|ENSG00000134851|ENST00000508404	1		0.949387		0.665748	-;-;1	-;-;1		0.676005	-;-;1	32.89	3	1	2	12612331	34.33	32.89	1	1					20.76	32.89	1	1	76	8.10625	7.43018
	ENSP00000258341	LAMC1 HGNC (curated)|Laminin subunit gamma-1 Precursor (Laminin B2 chain) [Source:UniProtKB/Swiss-Prot;Acc:P11047]|1|ENSG00000135862|ENST00000258341	16	13.1251	0.407871	26.444	0.665947	1;5;-	1;5;-		1.79173	1;5;-	14.85	1	16	45	2.79771e+07	342.511	9.57	10	14	435.989	11.06	13	18	331.58	9.32	9	13	1609	177.489	5.12256
	ENSP00000256496	ARL8B HGNC (curated)|ADP-ribosylation factor-like protein 8B (ADP-ribosylation factor-like protein 10C)(Novel small G protein indispensable for equal chromosome segregation 1) [Source:UniProtKB/Swiss-Prot;Acc:Q9NVJ2]|3|ENSG00000134108|ENST00000256496	1		0.489917		0.668597	-;1;-	-;1;-		1.32125	-;1;-	12.37	2	1	4	1.28086e+07	28.14	12.37	1	1	40.0567	12.37	1	3					186	21.5251	8.42627
	ENSP00000359346	NDUFB8 HGNC Symbol|NADH dehydrogenase (ubiquinone) 1 beta subcomplex, 8, 19kDa [Source:HGNC Symbol;Acc:7703]|ENSG00000166136|10|ENST00000370322	1		0.568061		0.669569	-;1;-	-;1;-		1.14115	-;1;-	10.32	2	2	3	4.26897e+06					30.81	6.45	1	1	21.71	10.32	2	2	155	18.4666	5.5415
	ENSP00000322788	MMP1 HGNC Symbol|matrix metallopeptidase 1 (interstitial collagenase) [Source:HGNC Symbol;Acc:7155]|ENSG00000196611|11|ENST00000315274	9	80.1701	1.23034	71.4874	0.67246	4;3;1	4;3;1	9.39413	0.588586	4;3;1	27.51	1	9	62	3.16261e+07	203.753	26.23	8	27	140.9	18.34	7	18	102.385	15.99	7	17	469	53.9728	6.96143
	ENSP00000363940	LAS1L HGNC Symbol|LAS1-like (S. cerevisiae) [Source:HGNC Symbol;Acc:25726]|ENSG00000001497|X|ENST00000374807	12		0.835294		0.672851	-;-;1	-;-;1		0.776538	-;-;1	20.64	4	12	40	1.24608e+07	253.883	18.41	11	17	161.802	12.97	8	12	130.537	15.48	9	11	717	81.1919	4.69092
	ENSP00000301396	AC091153.1 Clone-based (Ensembl)|Uncharacterized protein [Source:UniProtKB/TrEMBL;Acc:C9JFV4]|ENSG00000141456|17|ENST00000301396	14	77.0105	0.981937	55.0253	0.674771	3;2;2	3;2;2	15.3878	0.768762	3;2;2	18.76	3	16	62	1.52234e+07	276.677	16.01	13	23	152.455	12.48	11	20	178.269	13.42	12	19	1274	135.427	4.38623
	ENSP00000349391	POTEE HGNC (automatic)|POTE ankyrin domain family member E (ANKRD26-like family C member 1A)(Prostate, ovary, testis-expressed protein on chromosome 2)(POTE-2) [Source:UniProtKB/Swiss-Prot;Acc:Q6S8J3]|2|ENSG00000188219|ENST00000356920	3	27.3768	0.996589	16.7876	0.674985	1;3;-	1;3;-		0.687701	1;3;-	12.47	5	8	164	3.32545e+09	228.607	8.37	6	42	272.776	8.74	6	57	248.168	10.42	6	65	1075	121.286	6.20166
	ENSP00000387645	HCLS1 HGNC Symbol|hematopoietic cell-specific Lyn substrate 1 [Source:HGNC Symbol;Acc:4844]|ENSG00000180353|3|ENST00000428394	4		1.00759	34.1682	0.675958	-;1;3	-;1;3	35.2953	0.649497	-;1;3	10.91	3	5	17	1.03677e+07					56.42	8.46	4	8	78.3067	9.58	4	9	449	49.6739	4.7417
	ENSP00000265062	RAB7A HGNC (curated)|Ras-related protein Rab-7a [Source:UniProtKB/Swiss-Prot;Acc:P51149]|3|ENSG00000075785|ENST00000265062	6	24.2123	0.768104	30.414	0.680273	3;1;2	3;1;2	12.1141	0.885936	3;1;2	54.11	6	6	35	6.97265e+07	212.884	20.77	3	8	343.597	38.16	5	13	371.911	49.28	5	14	207	23.4748	6.69775
	ENSP00000358981	MECP2 HGNC Symbol|methyl CpG binding protein 2 (Rett syndrome) [Source:HGNC Symbol;Acc:6990]|ENSG00000169057|X|ENST00000369964	1		0.613458		0.680428	-;1;-	-;1;-		1.07384	-;1;-	8.49	4	1	1	2.72891e+06					20.17	8.49	1	1					271	29.3596	10.2866
	ENSP00000445432	FDXR HGNC Symbol|ferredoxin reductase [Source:HGNC Symbol;Acc:3642]|ENSG00000161513|17|ENST00000544854	11	9.59245	0.965997		0.680776	3;-;2	3;-;2	2.27503	0.649087	3;-;2	39.41	6	14	57	3.02125e+07	176.542	26.2	9	19	160.446	22.55	9	20	173.334	23.69	9	18	439	48.0262	6.94678
	ENSP00000439248	ITGA3 HGNC Symbol|integrin, alpha 3 (antigen CD49C, alpha 3 subunit of VLA-3 receptor) [Source:HGNC Symbol;Acc:6139]|ENSG00000005884|17|ENST00000538917	3		1.63956		0.681166	-;-;1	-;-;1		0.400506	-;-;1	1.93	3	3	3	1.8591e+06									37.35	1.93	3	3	1037	115.094	6.56592
	ENSP00000419038	GFM1 HGNC Symbol|G elongation factor, mitochondrial 1 [Source:HGNC Symbol;Acc:13780]|ENSG00000168827|3|ENST00000486715	4		1.05575		0.681458	-;-;1	-;-;1		0.622246	-;-;1	10.39	4	5	10	1.01975e+07	37.27	3.6	2	3	38.98	3.86	2	2	26.88	8.26	3	5	751	83.4184	7.00537
	ENSP00000374645	SOD1 HGNC Symbol|superoxide dismutase 1, soluble [Source:HGNC Symbol;Acc:11179]|ENSG00000142168|21|ENST00000389995	2		0.908256	13.552	0.68274	-;3;2	-;3;2	25.1398	0.724357	-;3;2	35.56	2	3	16	1.79415e+07					158.36	35.56	3	7	163.069	35.56	3	9	135	13.9008	6.11279
	ENSP00000349432	PRDX3 HGNC Symbol|peroxiredoxin 3 [Source:HGNC Symbol;Acc:9354]|ENSG00000165672|10|ENST00000356951	4	23.9553	0.928554	7.20137	0.683335	1;2;3	1;2;3	5.02216	0.811714	1;2;3	27.73	2	4	22	9.61444e+07	22.21	12.61	2	2	145.822	27.73	4	9	166.748	27.73	4	11	238	25.8223	7.45947
	ENSP00000227503	SF1 HGNC Symbol|splicing factor 1 [Source:HGNC Symbol;Acc:12950]|ENSG00000168066|11|ENST00000227503	8	8.28669	0.648394	7.13374	0.68346	1;8;7	1;8;7	4.80289	1.07256	1;8;7	23.91	8	10	54	2.80906e+07	28.65	4.2	2	4	125.877	16.24	7	22	210.316	18.25	8	28	548	59.6739	9.49561
	ENSP00000364920	FBLIM1 HGNC Symbol|filamin binding LIM protein 1 [Source:HGNC Symbol;Acc:24686]|ENSG00000162458|1|ENST00000332305	6		0.72955		0.684162	-;1;-	-;1;-		0.907914	-;1;-	21.74	10	7	24	1.25782e+07					135.37	19.93	6	11	155.958	18.12	5	13	276	30.7497	8.01611
	ENSP00000348099	PDLIM7 HGNC Symbol|PDZ and LIM domain 7 (enigma) [Source:HGNC Symbol;Acc:22958]|ENSG00000196923|5|ENST00000355841	7	20.6534	0.580984	5.93371	0.684651	4;3;5	4;3;5	12.8845	1.09289	4;3;5	25.82	11	7	44	2.98519e+07	186.075	8.32	3	13	185.25	19.91	5	15	219.39	25.82	7	16	457	49.8126	8.41162
	ENSP00000339485	WARS HGNC Symbol|tryptophanyl-tRNA synthetase [Source:HGNC Symbol;Acc:12729]|ENSG00000140105|14|ENST00000344102	7	46.3105	1.26995	46.4602	0.686926	6;4;4	6;4;4	23.1602	0.542455	6;4;4	16.98	13	7	44	2.32279e+07	149.806	16.98	6	13	240.992	16.98	7	14	225.838	16.98	7	17	430	48.8204	6.48096
	ENSP00000255945	GIMAP4 HGNC Symbol|GTPase, IMAP family member 4 [Source:HGNC Symbol;Acc:21872]|ENSG00000133574|7|ENST00000255945	8		0.416831	3.60465	0.689608	-;2;4	-;2;4	10.4521	1.46033	-;2;5	42.86	4	11	28	1.41664e+08	59.73	4.26	2	4	84.7357	25.53	6	7	156.105	42.86	11	17	329	37.5104	7.81104
	ENSP00000355467	SCCPDH HGNC (curated)|Probable saccharopine dehydrogenase (EC 1.5.1.9) [Source:UniProtKB/Swiss-Prot;Acc:Q8NBX0]|1|ENSG00000143653|ENST00000366510	2		0.698344	15.8756	0.689799	-;1;1	-;1;1	13.2614	0.952628	-;1;1	5.83	2	2	4	1.50611e+07					38.4039	5.83	2	2	52.0539	5.83	2	2	429	47.1215	9.14404
	ENSP00000363787	RING1 HGNC Symbol|ring finger protein 1 [Source:HGNC Symbol;Acc:10018]|6|ENSG00000204227|ENST00000374656	1		0.607487	19.7077	0.691379	-;1;1	-;1;1	18.1487	1.09789	-;1;1	3.69	3	2	10	8.41609e+06					29.13	3.69	2	5	20.77	3.69	2	5	406	42.4028	5.61768
	ENSP00000442988	ALDH4A1 HGNC Symbol|aldehyde dehydrogenase 4 family, member A1 [Source:HGNC Symbol;Acc:406]|ENSG00000159423|1|ENST00000538309	5		0.789442	2.5062	0.691546	-;2;4	-;2;4	1.64486	0.859272	-;2;4	12.72	6	5	13	1.03591e+07	64.51	2.58	1	2	65.17	7.55	3	4	108.823	12.72	5	7	503	55.0829	6.80029
	ENSP00000436723	TMEM126A HGNC Symbol|transmembrane protein 126A [Source:HGNC Symbol;Acc:25382]|11|ENSG00000171202|ENST00000531366	3		0.804692	1.49919	0.69173	-;2;2	-;2;2	9.14682	0.833283	-;2;2	60	2	4	9	1.03412e+07					31.5167	60	4	5	40.51	60	4	4	95	10.5577	9.34912
	ENSP00000309477	ACO1 HGNC Symbol|aconitase 1, soluble [Source:HGNC Symbol;Acc:117]|ENSG00000122729|9|ENST00000309951	5	6.21771	1.02106		0.69208	1;-;2	1;-;2	5.37589	0.675008	1;-;2	8.44	4	5	12	1.0404e+07	41.53	5.51	4	5					99.2	8.44	5	7	889	98.3366	6.68311
	ENSP00000335465	DLST HGNC Symbol|dihydrolipoamide S-succinyltransferase (E2 component of 2-oxo-glutarate complex) [Source:HGNC Symbol;Acc:2911]|ENSG00000119689|14|ENST00000334212	7	19.9511	0.800452	1.68259	0.694749	10;7;14	10;7;14	16.7636	0.869934	10;7;14	23.43	3	7	104	1.51622e+08	428.831	19.89	6	30	477.278	19.89	6	31	632.131	16.35	6	43	367	39.5279	9.5542
	ENSP00000391075	IDH1 HGNC Symbol|isocitrate dehydrogenase 1 (NADP+), soluble [Source:HGNC Symbol;Acc:5382]|ENSG00000138413|2|ENST00000415282	3	4.97853	0.508947		0.695602	2;-;1	2;-;1	8.7134	1.3616	2;-;1	40.13	2	4	24	2.57463e+07	115.515	19.11	3	8	45.67	31.85	3	8	90.73	19.11	3	8	157	17.7083	8.38232
	ENSP00000376024	SNX9 HGNC Symbol|sorting nexin 9 [Source:HGNC Symbol;Acc:14973]|6|ENSG00000130340|ENST00000392185	3		0.502273		0.697709	-;-;2	-;-;2		1.33912	-;-;2	3.7	2	3	12	8.9255e+06	54.0067	2.69	2	3	59.2633	2.69	2	3	79.93	3.7	3	6	595	66.5496	5.57959
	ENSP00000371470	TP53BP1 HGNC Symbol|tumor protein p53 binding protein 1 [Source:HGNC Symbol;Acc:11999]|ENSG00000067369|15|ENST00000382039	4	58.84	0.768591	46.9265	0.699084	1;1;-	1;1;-		0.943466	1;1;-	2.96	5	4	14	1.74935e+07	148.183	2.23	3	4	152.01	2.96	4	6	205.505	2.59	3	4	1927	208.89	4.66553
	ENSP00000436944	THYN1 HGNC Symbol|thymocyte nuclear protein 1 [Source:HGNC Symbol;Acc:29560]|ENSG00000151500|11|ENST00000534274	1		0.555806		0.70077	-;-;1	-;-;1		1.21545	-;-;1	12.3	3	1	2	8.40688e+06									35.58	12.3	1	2	122	13.3999	9.71533
	ENSP00000436941	DPP3 HGNC Symbol|dipeptidyl-peptidase 3 [Source:HGNC Symbol;Acc:3008]|ENSG00000254986|11|ENST00000530165	11	24.5652	1.0376	26.1047	0.701576	3;1;-	3;1;-		0.666565	3;1;-	19.09	11	11	39	1.86463e+07	209.394	11.17	7	15	110.779	10.89	7	9	299.638	16.83	8	15	707	79.2582	5.03369
	ENSP00000309732	CD44 HGNC Symbol|CD44 molecule (Indian blood group) [Source:HGNC Symbol;Acc:1681]|ENSG00000026508|11|ENST00000352818	5	16.9257	0.470533	12.6361	0.705117	7;4;4	7;4;4	7.9239	1.50994	7;4;4	27.35	25	6	54	7.20622e+07	229.873	16.47	5	18	236.159	16.47	5	16	209.724	21.76	5	20	340	37.2542	5.51611
	ENSP00000370377	PITRM1 HGNC Symbol|pitrilysin metallopeptidase 1 [Source:HGNC Symbol;Acc:17663]|ENSG00000107959|10|ENST00000380989	13	24.8019	0.837755	1.74061	0.705365	7;9;4	7;9;4	13.4331	0.89188	7;9;4	23.31	7	14	85	2.83725e+07	469.411	20.33	13	27	364.635	21.19	12	34	487.118	17.44	11	24	1038	117.437	6.91748
	ENSP00000403017	ADSS HGNC Symbol|adenylosuccinate synthase [Source:HGNC Symbol;Acc:292]|ENSG00000035687|1|ENST00000449326	7	69.9167	1.18386	74.6692	0.705409	1;1;-	1;1;-		0.580801	1;1;-	23.68	4	7	40	2.81856e+07	321.479	20.46	6	16	196.437	19.31	6	10	274.474	16.09	5	14	435	47.8806	5.90967
	ENSP00000409149	MAPK1 HGNC Symbol|mitogen-activated protein kinase 1 [Source:HGNC Symbol;Acc:6871]|ENSG00000100030|22|ENST00000415911	5		0.819541		0.705995	-;-;2	-;-;2		0.830452	-;-;2	41.95	6	8	28	2.23933e+07	89.17	12.93	3	5	187.44	20.69	5	8	241.383	41.95	8	15	348	40.3948	7.15186
	ENSP00000303412	FAM98B HGNC Symbol|family with sequence similarity 98, member B [Source:HGNC Symbol;Acc:26773]|ENSG00000171262|15|ENST00000305752	6	26.4972	0.819955	29.0839	0.706271	7;6;6	7;6;6	6.49745	0.849808	7;6;6	22.12	6	8	67	1.85062e+07	311.641	21.82	7	22	288.52	22.12	8	21	410.409	14.24	6	24	330	37.167	6.29053
	ENSP00000221566	SGTA HGNC Symbol|small glutamine-rich tetratricopeptide repeat (TPR)-containing, alpha [Source:HGNC Symbol;Acc:10819]|ENSG00000104969|19|ENST00000221566	3		0.785084		0.70665	-;-;1	-;-;1		0.867704	-;-;1	13.1	1	3	4	1.33654e+07					46.05	4.47	1	1	55.96	13.1	3	3	313	34.0417	4.86865
	ENSP00000316032	NUP98 HGNC Symbol|nucleoporin 98kDa [Source:HGNC Symbol;Acc:8068]|ENSG00000110713|11|ENST00000324932	14	74.0466	0.713658	67.3993	0.706817	1;1;2	1;1;2	7.83557	1.02907	1;1;2	8	8	15	68	1.0729e+07	155.788	5.61	11	26	157.912	5.28	10	19	131.201	7.33	14	23	1800	195.696	6.3667
	ENSP00000201886	KHSRP HGNC Symbol|KH-type splicing regulatory protein [Source:HGNC Symbol;Acc:6316]|ENSG00000088247|19|ENST00000201886	16		0.648201	11.6887	0.709413	-;14;9	-;14;9	6.79525	1.02508	-;14;9	37.46	3	16	92	6.45295e+07	140.041	7.18	3	7	843.128	32.11	14	46	976.294	23.66	12	39	710	72.8513	7.89893
	ENSP00000352668	RBM12 HGNC Symbol|RNA binding motif protein 12 [Source:HGNC Symbol;Acc:9898]|ENSG00000244462|20|ENST00000359646	7	47.7144	0.770194	23.046	0.710098	2;3;4	2;3;4	16.2565	0.951328	2;3;4	9.76	2	8	30	3.72523e+07	31.278	4.94	5	7	67.3571	8.8	7	12	92.5143	5.26	5	11	932	97.3334	8.63135
	ENSP00000338358	SERPINB6 HGNC Symbol|serpin peptidase inhibitor, clade B (ovalbumin), member 6 [Source:HGNC Symbol;Acc:8950]|ENSG00000124570|6|ENST00000335686	3		0.718458		0.710695	-;-;3	-;-;3		0.953598	-;-;3	14.1	1	3	13	4.36015e+07	125.757	2.66	1	3	88.08	2.66	1	2	242.231	14.1	3	8	376	42.5941	5.2749
	ENSP00000313432	GRHPR HGNC Symbol|glyoxylate reductase/hydroxypyruvate reductase [Source:HGNC Symbol;Acc:4570]|ENSG00000137106|9|ENST00000318158	7		0.85538	1.32138	0.712009	-;2;2	-;2;2	4.52879	0.8047	-;2;2	21.65	4	7	32	1.98496e+07	57.4024	6.1	3	9	81.1557	17.07	5	9	150.851	21.65	7	14	328	35.6457	7.38623
	ENSP00000415935	ATIC HGNC Symbol|5-aminoimidazole-4-carboxamide ribonucleotide formyltransferase/IMP cyclohydrolase [Source:HGNC Symbol;Acc:794]|2|ENSG00000138363|ENST00000435675	4	69.7198	1.25939	59.5459	0.713348	1;1;1	1;1;1	28.8763	0.584981	1;1;1	8.12	5	4	9	6.35489e+06	34.9	4.4	2	2	55.0019	6.26	3	3	62.0419	5.58	3	4	591	64.4833	6.7124
	ENSP00000368722	LDHA HGNC Symbol|lactate dehydrogenase A [Source:HGNC Symbol;Acc:6535]|ENSG00000134333|11|ENST00000379412	3	35.4354	0.593041	48.0899	0.713449	4;4;4	4;4;4	4.47755	1.22282	4;4;4	20.18	19	5	72	3.81995e+08	320.764	20.18	5	24	371.173	20.18	5	23	537.165	20.18	5	25	332	36.6654	8.26514
	ENSP00000389047	PRDX1 HGNC Symbol|peroxiredoxin 1 [Source:HGNC Symbol;Acc:9352]|ENSG00000117450|1|ENST00000424390	1	41.1213	1.03326	41.9741	0.713528	1;2;3	1;2;3	9.13362	0.684448	1;2;3	28.07	3	4	118	2.32725e+08	709.187	28.07	4	33	1107.63	28.07	4	45	853.902	28.07	4	40	171	18.9637	6.91748
	ENSP00000438399	KIAA0174 HGNC Symbol|KIAA0174 [Source:HGNC Symbol;Acc:28977]|ENSG00000182149|16|ENST00000535424	5	26.4331	0.755219	13.2604	0.714789	1;1;2	1;1;2	22.0187	0.964917	1;1;2	23.22	12	7	32	1.04176e+07	76.23	9.76	4	7	97.05	16.36	5	13	177.323	16.62	6	12	379	41.5394	5.56689
	ENSP00000216281	HSP90AA2 HGNC (automatic)|Heat shock protein HSP 90-alpha (HSP 86)(Renal carcinoma antigen NY-REN-38) [Source:UniProtKB/Swiss-Prot;Acc:P07900]|14|ENSG00000080824|ENST00000216281	17	18.7791	0.932938	26.6482	0.715844	52;52;56	52;52;56	9.39594	0.710646	52;52;56	43.17	4	22	711	6.10748e+08	3630.39	38.11	21	218	3617.55	38.11	20	235	4615.14	43.17	21	258	732	84.6067	5.021
	ENSP00000354532	PNP HGNC Symbol|purine nucleoside phosphorylase [Source:HGNC Symbol;Acc:7892]|ENSG00000198805|14|ENST00000361505	10	22.5238	1.13206	20.3447	0.717931	6;3;5	6;3;5	19.6866	0.689161	6;3;5	43.25	5	10	82	1.02937e+08	370.924	24.91	7	25	414.949	29.76	6	26	555.86	43.25	10	31	289	32.0972	6.94678
	ENSP00000338862	BRIX1 HGNC Symbol|BRX1, biogenesis of ribosomes, homolog (S. cerevisiae) [Source:HGNC Symbol;Acc:24170]|ENSG00000113460|5|ENST00000336767	6	82.49	0.872185	53.2233	0.718066	3;1;1	3;1;1	40.5073	0.941402	3;1;1	18.13	1	9	46	1.26883e+07	119.719	18.13	9	16	63.2823	13.03	6	14	82.3858	13.03	6	16	353	41.3749	9.92041
	ENSP00000225655	PFN1 HGNC Symbol|profilin 1 [Source:HGNC Symbol;Acc:8881]|ENSG00000108518|17|ENST00000225655	2	61.9703	1.5592	2.88734	0.71846	1;2;2	1;2;2	51.3649	0.573667	1;2;2	23.57	1	2	36	2.0693e+08	187.2	23.57	2	5	470.515	23.57	2	13	550.974	23.57	2	18	140	15.0446	8.26514
	ENSP00000400175	RHOA HGNC Symbol|ras homolog gene family, member A [Source:HGNC Symbol;Acc:667]|ENSG00000067560|3|ENST00000418115	2		0.738627	55.9981	0.718477	-;1;2	-;1;2	9.40082	0.969675	-;1;2	21.76	1	3	11	5.31799e+07					79.11	21.76	3	7	52.92	21.76	3	4	193	21.7541	6.1001
	ENSP00000363638	LYPLA2 HGNC Symbol|lysophospholipase II [Source:HGNC Symbol;Acc:6738]|ENSG00000011009|1|ENST00000374514	2		1.03783	10.4665	0.720962	-;1;1	-;1;1	20.3325	0.678094	-;1;1	18.61	8	3	6	2.35209e+07					87.06	18.61	3	3	73.77	18.61	3	3	231	24.7207	7.2251
	ENSP00000321070	ME2 HGNC Symbol|malic enzyme 2, NAD(+)-dependent, mitochondrial [Source:HGNC Symbol;Acc:6984]|ENSG00000082212|18|ENST00000321341	12	11.0067	0.836419	8.21664	0.721106	6;8;3	6;8;3	13.0988	0.807231	6;8;3	45.89	8	13	77	4.2797e+07	532.21	31.51	10	30	463.226	45.89	13	26	385.737	29.97	9	21	584	65.4018	7.60596
	ENSP00000305653	LETM1 HGNC (curated)|LETM1 and EF-hand domain-containing protein 1, mitochondrial Precursor (Leucine zipper-EF-hand-containing transmembrane protein 1) [Source:UniProtKB/Swiss-Prot;Acc:O95202]|4|ENSG00000168924|ENST00000302787	7	29.6291	0.822269	6.44124	0.721537	5;2;3	5;2;3	18.6521	0.945851	5;2;3	8.39	2	8	46	2.39709e+07	77.8038	8.39	8	18	30.2968	6.22	6	14	74.2718	7.71	7	14	739	83.302	6.69775
	ENSP00000385266	SNRPD3 HGNC Symbol|small nuclear ribonucleoprotein D3 polypeptide 18kDa [Source:HGNC Symbol;Acc:11160]|ENSG00000100028|22|ENST00000402849	3		1.41473		0.722148	-;-;1	-;-;1		0.492078	-;-;1	50.83	4	3	11	1.29435e+08					102.034	50.83	3	4	162.415	50.83	3	7	120	13.2829	8.90967
	ENSP00000269886	SH3GL1 HGNC Symbol|SH3-domain GRB2-like 1 [Source:HGNC Symbol;Acc:10830]|ENSG00000141985|19|ENST00000269886	7	9.74398	0.60393		0.722547	5;-;4	5;-;4	16.1269	1.17678	5;-;4	27.72	2	7	25	1.58633e+07	76.44	27.72	7	7	53.72	3.26	1	3	135.737	27.72	7	15	368	41.464	5.42725
	ENSP00000313705	LUZP1 HGNC Symbol|leucine zipper protein 1 [Source:HGNC Symbol;Acc:14985]|ENSG00000169641|1|ENST00000314174	3		0.990262	23.9887	0.722764	-;1;1	-;1;1	61.8385	0.80764	-;1;1	8.28	2	5	17	1.68118e+07	0	0.78	1	1	42.79	3.51	3	4	52.13	6.92	4	12	1026	114.518	8.88037
	ENSP00000300060	ANPEP HGNC Symbol|alanyl (membrane) aminopeptidase [Source:HGNC Symbol;Acc:500]|ENSG00000166825|15|ENST00000300060	20	13.3535	0.641665	26.8078	0.723487	62;50;59	62;50;59	15.0373	1.05163	62;50;59	31.13	2	20	617	4.70295e+08	4090.64	31.13	20	199	3594.93	31.13	19	196	3771.43	31.13	19	222	967	109.471	5.47803
	ENSP00000396673	FTSJ3 HGNC Symbol|FtsJ homolog 3 (E. coli) [Source:HGNC Symbol;Acc:17136]|ENSG00000108592|17|ENST00000427159	12	30.3376	1.00098	7.20891	0.724495	5;3;7	5;3;7	29.5583	0.746344	5;3;7	16.65	1	13	60	2.10244e+07	195.567	12.28	10	19	193.679	9.92	9	21	153.217	9.8	10	20	847	96.4992	8.39697
	ENSP00000278927	ESAM HGNC Symbol|endothelial cell adhesion molecule [Source:HGNC Symbol;Acc:17474]|ENSG00000149564|11|ENST00000278927	3		0.186456		0.726678	1;-;-	1;-;-		4.00594	1;-;-	17.18	3	4	9	1.57975e+07	57.8733	17.18	4	4	42.2	11.03	2	2	101.833	11.03	2	3	390	41.1506	9.31982
	ENSP00000325223	TCOF1 HGNC Symbol|Treacher Collins-Franceschetti syndrome 1 [Source:HGNC Symbol;Acc:11654]|ENSG00000070814|5|ENST00000323668	3		0.567179	28.4772	0.730272	-;1;1	-;1;1	9.30744	1.23237	-;1;1	2.69	9	4	5	3.28874e+06					43.6082	1.35	2	2	27.69	1.98	3	3	1411	144.228	9.0415
	ENSP00000368303	PDLIM4 HGNC Symbol|PDZ and LIM domain 4 [Source:HGNC Symbol;Acc:16501]|ENSG00000131435|5|ENST00000379018	5		0.906037		0.730789	-;1;-	-;1;-		0.780886	-;1;-	31.3	3	5	14	1.04474e+07					23.8072	27.24	4	6	56.65	31.3	5	8	246	25.8378	7.59131
	ENSP00000444567	SEPT7 HGNC Symbol|septin 7 [Source:HGNC Symbol;Acc:1717]|ENSG00000122545|7|ENST00000537785	9	28.9741	0.92537	20.5038	0.732007	5;6;3	5;6;3	19.2318	0.831225	5;6;3	42.67	17	9	56	2.10459e+07	210.061	40.31	8	21	138.628	18.06	4	16	264.829	25.92	6	19	382	44.6159	8.22119
	ENSP00000254654	ILKAP HGNC Symbol|integrin-linked kinase-associated serine/threonine phosphatase [Source:HGNC Symbol;Acc:15566]|ENSG00000132323|2|ENST00000254654	5		0.868984		0.735323	3;-;-	3;-;-		0.81851	3;-;-	18.37	3	5	8	7.28669e+06	51.2574	18.37	5	5	32.34	5.87	2	2	36	2.3	1	1	392	42.8798	7.09326
	ENSP00000217131	CTSZ HGNC Symbol|cathepsin Z [Source:HGNC Symbol;Acc:2547]|ENSG00000101160|20|ENST00000217131	8	3.52215	0.796408	15.0623	0.735937	7;5;10	7;5;10	8.55668	0.906132	7;5;10	36.63	5	8	97	9.74158e+07	391.223	29.37	7	26	528.223	29.37	7	30	721.664	36.63	8	41	303	33.8462	7.10791
	ENSP00000361841	VCL HGNC Symbol|vinculin [Source:HGNC Symbol;Acc:12665]|ENSG00000035403|10|ENST00000372755	38	23.49	0.672172	15.1444	0.736625	64;69;80	64;69;80	19.7766	1.12193	64;69;80	61.63	6	41	652	9.50343e+07	2991.17	50.75	34	196	3386.34	51.97	35	220	4497.21	60.04	38	236	1066	116.649	6.0874
	ENSP00000362006	MACF1 HGNC Symbol|microtubule-actin crosslinking factor 1 [Source:HGNC Symbol;Acc:13664]|ENSG00000127603|1|ENST00000372915	29	22.0557	0.71311	35.3684	0.738368	1;1;-	1;1;-		1.08756	1;1;-	5.27	34	35	117	8.28845e+07	372.142	3	20	32	373.257	3.26	23	40	392.15	3.9	27	45	7388	837.787	5.38916
	ENSP00000381293	NSF HGNC Symbol|N-ethylmaleimide-sensitive factor [Source:HGNC Symbol;Acc:8016]|ENSG00000073969|17|ENST00000398238	6	21.7731	0.876296	10.5302	0.738525	3;3;3	3;3;3	16.9976	0.889558	3;3;3	12.23	2	6	51	2.2153e+07	158.772	8.06	5	17	118.812	9.14	5	15	161.196	9.14	5	19	744	82.5421	6.94678
	ENSP00000312356	RG9MTD1 HGNC Symbol|RNA (guanine-9-) methyltransferase domain containing 1 [Source:HGNC Symbol;Acc:26022]|ENSG00000174173|3|ENST00000309922	2		1.08649		0.738565	1;-;-	1;-;-		0.698722	1;-;-	10.92	1	2	2	9.18994e+06	49.36	10.92	2	2									403	47.3166	9.36377
	ENSP00000379933	TPI1 HGNC Symbol|triosephosphate isomerase 1 [Source:HGNC Symbol;Acc:12009]|ENSG00000111669|12|ENST00000396705	4	21.0956	0.736964	7.3951	0.73942	4;8;9	4;8;9	23.1749	1.03879	4;8;9	39.76	3	4	63	9.31769e+07	580.925	11.65	2	12	724.297	25.7	3	24	904.074	39.76	4	27	249	26.6527	6.90283
	ENSP00000368776	NAE1 HGNC Symbol|NEDD8 activating enzyme E1 subunit 1 [Source:HGNC Symbol;Acc:621]|ENSG00000159593|16|ENST00000379463	5	25.7788	0.715464	16.3386	0.741275	1;3;1	1;3;1	37.4577	0.968862	1;3;1	15.91	8	6	18	1.72704e+07	117.069	7.39	3	5	129.444	11.93	5	7	164.232	14.58	5	6	528	59.383	5.23682
	ENSP00000291567	G6PD HGNC Symbol|glucose-6-phosphate dehydrogenase [Source:HGNC Symbol;Acc:4057]|ENSG00000160211|X|ENST00000291567	23	46.1185	0.92233	49.7117	0.742071	14;15;11	14;15;11	20.1587	0.74846	14;15;11	65.05	6	24	187	4.91782e+07	771.415	49.71	19	54	923.852	56.7	22	62	1070.05	59.22	22	71	515	59.219	6.84424
	ENSP00000357044	NCSTN HGNC Symbol|nicastrin [Source:HGNC Symbol;Acc:17091]|1|ENSG00000162736|ENST00000368065	2		0.942549		0.744088	1;-;-	1;-;-		0.811446	1;-;-	8.2	4	3	4	5.38562e+06	0	8.2	3	4									451	50.2297	5.64307
	ENSP00000216605	MTHFD1 HGNC (curated)|C-1-tetrahydrofolate synthase, cytoplasmic (C1-THF synthase) [Includes Methylenetetrahydrofolate dehydrogenase(EC 1.5.1.5);Methenyltetrahydrofolate cyclohydrolase(EC 3.5.4.9);Formyltetrahydrofolate synthetase(EC 6.3.4.3)] [Source:UniProtKB/Swiss-Prot;Acc:P11586]|14|ENSG00000100714|ENST00000216605	6	37.022	1.07638	30.4142	0.744688	1;2;2	1;2;2	19.2661	0.698861	1;2;2	9.73	4	7	21	1.26409e+07	83.09	5.03	4	6	74.4571	6.2	4	7	100.854	7.7	5	8	935	101.467	7.29834
	ENSP00000313490	PFAS HGNC Symbol|phosphoribosylformylglycinamidine synthase [Source:HGNC Symbol;Acc:8863]|ENSG00000178921|17|ENST00000314666	7		0.775687		0.74646	-;1;-	-;1;-		0.931668	-;1;-	8.3	3	7	20	1.01132e+07	44.81	4.33	3	3	68.09	7.62	6	10	98.9467	7.4	6	7	1338	144.643	5.75732
	ENSP00000290158	KPNB1 HGNC Symbol|karyopherin (importin) beta 1 [Source:HGNC Symbol;Acc:6400]|ENSG00000108424|17|ENST00000290158	8	6.44904	0.773508	29.9363	0.746532	4;5;6	4;5;6	4.251	0.937854	4;5;7	17.47	3	9	93	7.89124e+07	778.454	12.9	7	29	599.279	16.44	8	28	836.566	17.47	9	36	876	97.108	4.77979
	ENSP00000383941	BUB3 HGNC Symbol|budding uninhibited by benzimidazoles 3 homolog (yeast) [Source:HGNC Symbol;Acc:1151]|ENSG00000154473|10|ENST00000407911	7	17.4995	0.942997	25.1236	0.746773	5;1;1	5;1;1	13.8607	0.822269	5;1;1	28.06	5	7	45	2.97312e+07	113.06	25.9	6	17	102.096	19.78	6	15	90.9762	20.14	5	13	278	31.6837	8.1626
	ENSP00000286371	ATP1B3 HGNC Symbol|ATPase, Na+/K+ transporting, beta 3 polypeptide [Source:HGNC Symbol;Acc:806]|ENSG00000069849|3|ENST00000286371	2		0.61389	3.12577	0.747749	-;1;2	-;1;2	20.7676	1.19845	-;1;2	6.81	5	2	5	1.29292e+07					29.4833	3.94	1	3	28.86	6.81	2	2	279	31.4921	8.35303
	ENSP00000389404	PDHX HGNC (automatic)|Pyruvate dehydrogenase protein X component, mitochondrial Precursor (Dihydrolipoamide dehydrogenase-binding protein of pyruvate dehydrogenase complex)(Lipoyl-containing pyruvate dehydrogenase complex component X)(E3-binding protein)(E3BP)(proX) [Source:UniProtKB/Swiss-Prot;Acc:O00330]|11|ENSG00000110435|ENST00000448838	3	10.7725	1.15151	24.4257	0.747864	1;1;2	1;1;2	17.3517	0.635096	1;1;2	11.11	6	5	45	6.617e+06	58.0167	7	4	14	84.2567	7	4	14	83.71	11.11	5	17	486	51.4282	6.34131
	ENSP00000445221	HSPA4 HGNC Symbol|heat shock 70kDa protein 4 [Source:HGNC Symbol;Acc:5237]|ENSG00000170606|5|ENST00000537974	6	34.0296	0.921515	23.9188	0.749406	3;3;2	3;3;2	17.3199	0.794508	3;3;2	30.23	7	7	61	3.61158e+07	248.084	23.68	6	20	339.09	26.64	6	21	339.994	18.82	5	20	473	52.2248	8.1626
	ENSP00000376233	OPA1 HGNC Symbol|optic atrophy 1 (autosomal dominant) [Source:HGNC Symbol;Acc:8140]|ENSG00000198836|3|ENST00000392438	8	12.5517	0.894525	7.47459	0.750179	2;3;2	2;3;2	3.81643	0.848558	2;3;2	8.75	8	8	37	9.65621e+06	166.477	6.98	6	13	134.493	7.08	6	11	150.47	7.92	7	13	960	111.561	7.86963
	ENSP00000325425	MAT2B HGNC Symbol|methionine adenosyltransferase II, beta [Source:HGNC Symbol;Acc:6905]|ENSG00000038274|5|ENST00000321757	6	19.2026	1.00206	9.05592	0.750602	2;3;5	2;3;5	27.3848	0.799559	2;3;5	26.35	7	6	33	2.62311e+07	90.87	11.08	3	6	197.84	17.66	4	10	293.53	26.35	6	17	334	37.5282	7.35693
	ENSP00000320658	YARS2 HGNC Symbol|tyrosyl-tRNA synthetase 2, mitochondrial [Source:HGNC Symbol;Acc:24249]|ENSG00000139131|12|ENST00000324868	6		0.967874		0.751634	4;-;-	4;-;-		0.795526	4;-;-	15.93	2	7	10	7.51605e+06	76.77	15.93	7	10									477	53.1657	8.98291
	ENSP00000441406	ARL6IP4 HGNC Symbol|ADP-ribosylation-like factor 6 interacting protein 4 [Source:HGNC Symbol;Acc:18076]|12|ENSG00000182196|ENST00000413381	1		0.778649		0.752002	-;1;-	-;1;-		0.935015	-;1;-	6.64	12	2	3	1.48371e+07					22.08	6.64	2	3					211	23.6735	10.9604
	ENSP00000155926	TRIB2 HGNC Symbol|tribbles homolog 2 (Drosophila) [Source:HGNC Symbol;Acc:30809]|2|ENSG00000071575|ENST00000155926	1	4.44698	0.5105		0.752523	1;-;1	1;-;1	12.7979	1.45676	1;-;1	6.71	3	3	30	6.55326e+07	0	1.46	1	6	0	5.25	2	9	0	6.71	3	15	343	38.7763	6.15088
	ENSP00000380983	PTTG1IP HGNC Symbol|pituitary tumor-transforming 1 interacting protein [Source:HGNC Symbol;Acc:13524]|21|ENSG00000183255|ENST00000397886	3		0.392767		0.752739	-;2;-	-;2;-		1.85546	-;2;-	13.21	2	3	5	6.40323e+06					43.71	13.21	3	5					159	18.3193	9.48096
	ENSP00000322577	TPM1 HGNC Symbol|tropomyosin 1 (alpha) [Source:HGNC Symbol;Acc:12010]|15|ENSG00000140416|ENST00000317516	4		0.953701		0.752779	-;1;-	-;1;-		0.764182	-;1;-	40.41	20	11	86	7.65628e+07	29.04	10.61	2	3	659.256	34.29	10	38	788.303	37.14	10	45	245	28.5076	4.77979
	ENSP00000349168	HNRNPH1 HGNC Symbol|heterogeneous nuclear ribonucleoprotein H1 (H) [Source:HGNC Symbol;Acc:5041]|ENSG00000169045|5|ENST00000356731	6		0.871177		0.752782	-;-;1	-;-;1		0.833002	-;-;1	53.45	23	15	387	3.10749e+08	1983.05	45.88	13	121	2303.69	46.99	14	133	2646.01	52.34	14	133	449	49.1984	6.30322
	ENSP00000360683	PTPN1 HGNC Symbol|protein tyrosine phosphatase, non-receptor type 1 [Source:HGNC Symbol;Acc:9642]|ENSG00000196396|20|ENST00000371621	8		0.760543	29.0107	0.753427	-;2;1	-;2;1	2.35116	0.954428	-;2;1	24.37	2	8	47	1.463e+07	381.408	14.94	5	15	261.925	24.37	8	16	351.981	12.41	4	16	435	49.9348	6.26514
	ENSP00000444420	TMEM30A HGNC Symbol|transmembrane protein 30A [Source:HGNC Symbol;Acc:16667]|6|ENSG00000112697|ENST00000545449	5	28.5449	0.827436	4.61402	0.755498	2;2;1	2;2;1	32.5533	0.961105	2;2;1	16.52	5	6	17	6.59048e+06	43.4867	16.52	6	8	77.49	8.99	3	5	70.8876	8.7	3	4	345	39.193	8.92432
	ENSP00000346402	RNH1 HGNC Symbol|ribonuclease/angiogenin inhibitor 1 [Source:HGNC Symbol;Acc:10074]|ENSG00000023191|11|ENST00000354420	15	26.5061	0.705454	15.2851	0.756247	5;3;4	5;3;4	12.9204	1.08112	5;3;4	64.86	10	15	83	5.20715e+07	765.886	50.11	13	32	412.113	42.73	11	20	617.043	55.75	13	31	461	49.9411	4.81787
	ENSP00000378719	KTN1 HGNC (curated)|Kinectin (Kinesin receptor)(CG-1 antigen) [Source:UniProtKB/Swiss-Prot;Acc:Q86UP2]|14|ENSG00000126777|ENST00000395308	9	13.6836	0.640728	10.3707	0.756571	2;3;4	2;3;4	18.4702	1.09831	2;3;4	8.04	7	9	33	5.73843e+06	44.73	4.36	5	7	108.195	5.82	6	11	114.344	8.04	9	15	1306	150.26	5.74463
	ENSP00000270225	SAE1 HGNC Symbol|SUMO1 activating enzyme subunit 1 [Source:HGNC Symbol;Acc:30660]|ENSG00000142230|19|ENST00000270225	3		0.888293	0.0335084	0.758566	-;2;2	-;2;2	29.164	0.861974	-;2;2	10.98	5	3	14	1.75767e+07					63.47	10.98	3	5	130.508	10.98	3	9	346	38.4256	5.30029
	ENSP00000402851	TTLL12 HGNC Symbol|tubulin tyrosine ligase-like family, member 12 [Source:HGNC Symbol;Acc:28974]|ENSG00000100304|22|ENST00000423379	4		0.668069		0.760016	-;-;1	-;-;1		1.09669	-;-;1	11.48	3	5	6	6.50959e+07									92.32	11.48	5	6	636	73.5006	5.5415
	ENSP00000261973	RBM25 HGNC Symbol|RNA binding motif protein 25 [Source:HGNC Symbol;Acc:23244]|ENSG00000119707|14|ENST00000261973	10	69.234	0.984997	35.5288	0.760039	2;4;7	2;4;7	25.2316	0.814931	2;4;7	16.49	4	12	58	4.626e+07	94.72	6.41	4	12	127.999	8.42	6	17	211.86	13.88	10	29	843	100.124	6.31592
	ENSP00000222673	OGDH HGNC Symbol|oxoglutarate (alpha-ketoglutarate) dehydrogenase (lipoamide) [Source:HGNC Symbol;Acc:8124]|ENSG00000105953|7|ENST00000222673	19	11.9441	0.716833	3.08605	0.760477	12;9;11	12;9;11	12.2092	1.07353	12;9;11	26.78	11	19	111	2.39237e+07	407.812	20.04	15	37	416.913	19.84	15	35	461.209	19.45	14	39	1023	115.861	6.85889
	ENSP00000443934	KLHDC5 HGNC Symbol|kelch domain containing 5 [Source:HGNC Symbol;Acc:29252]|12|ENSG00000087448|ENST00000543254	1		0.720748		0.762375	-;-;2	-;-;2		1.01969	-;-;2	3.35	1	1	3	1.11753e+07									0	3.35	1	3	179	19.8009	7.85498
	ENSP00000285968	NUP205 HGNC (curated)|Nuclear pore complex protein Nup205 (Nucleoporin Nup205)(205 kDa nucleoporin) [Source:UniProtKB/Swiss-Prot;Acc:Q92621]|7|ENSG00000155561|ENST00000285968	6	13.5526	0.704657	20.5363	0.762931	2;1;1	2;1;1	18.6624	1.07053	2;1;1	4.22	14	9	19	5.93681e+06	88.5592	2.98	7	8	58.198	2.39	6	6	66.136	2.09	5	5	2012	227.776	6.18896
	ENSP00000346634	THRAP3 HGNC (curated)|Thyroid hormone receptor-associated protein 3 (Thyroid hormone receptor-associated protein complex 150 kDa component)(Trap150) [Source:UniProtKB/Swiss-Prot;Acc:Q9Y2W1]|1|ENSG00000054118|ENST00000354618	14	68.9188	0.764739	58.281	0.763215	6;7;7	6;7;7	6.35382	0.986613	6;7;7	25.03	5	20	125	3.92086e+08	297.224	15.71	13	34	335.095	20.94	17	45	379.175	18.32	15	46	955	108.601	10.1548
	ENSP00000397760	NDUFS1 HGNC Symbol|NADH dehydrogenase (ubiquinone) Fe-S protein 1, 75kDa (NADH-coenzyme Q reductase) [Source:HGNC Symbol;Acc:7707]|ENSG00000023228|2|ENST00000423725	15	11.9096	0.846599	3.81968	0.763722	6;7;5	6;7;5	14.3977	0.940672	6;7;5	30.75	8	15	61	2.96657e+07	429.238	25.37	13	20	320.894	26.87	13	17	519.389	24.48	12	24	670	73.4804	5.87158
	ENSP00000217971	PGRMC1 HGNC (curated)|Membrane-associated progesterone receptor component 1 (mPR) [Source:UniProtKB/Swiss-Prot;Acc:O00264]|X|ENSG00000101856|ENST00000217971	6		0.738092	0.00227481	0.764904	-;3;3	-;3;3	3.08067	1.02985	-;3;3	35.38	2	8	28	2.51483e+07	27.4	4.1	1	1	327.247	34.87	7	14	302.865	25.13	7	13	195	21.6578	4.70361
	ENSP00000343943	PPOX HGNC Symbol|protoporphyrinogen oxidase [Source:HGNC Symbol;Acc:9280]|ENSG00000143224|1|ENST00000352210	10	30.2426	0.853197	1.90234	0.765587	1;1;-	1;1;-		0.934763	1;1;-	26.42	6	10	33	2.23885e+07	164.633	26.42	10	14	78.54	10.48	5	11	36.8	7.97	4	8	477	50.7337	8.1626
	ENSP00000419303	MRPS22 HGNC Symbol|mitochondrial ribosomal protein S22 [Source:HGNC Symbol;Acc:14508]|ENSG00000175110|3|ENST00000478464	3		0.997574		0.766858	-;1;-	-;1;-		0.744238	-;1;-	8.78	7	3	4	9.62913e+06					29.0947	4.39	2	2	44.1347	5.96	2	2	319	36.7829	6.81494
	ENSP00000349721	TSG101 HGNC Symbol|tumor susceptibility gene 101 [Source:HGNC Symbol;Acc:15971]|ENSG00000074319|11|ENST00000357193	2		1.04691		0.766921	-;1;-	-;1;-		0.709225	-;1;-	10.18	3	3	4	4.27338e+06					0	10.18	3	3	21.26	3.51	1	1	285	31.7122	5.32568
	ENSP00000329161	SEPT9 HGNC Symbol|septin 9 [Source:HGNC Symbol;Acc:7323]|ENSG00000184640|17|ENST00000329047	11	23.8646	0.770235	24.29	0.767161	13;13;18	13;13;18	13.2154	0.962004	13;13;18	28.7	16	12	107	1.57933e+07	393.678	24.47	10	30	430.489	19.54	8	30	682.191	28.7	12	47	568	63.6259	8.39697
	ENSP00000281537	TJP1 HGNC (curated)|Tight junction protein ZO-1 (Zonula occludens protein 1)(Zona occludens protein 1)(Tight junction protein 1) [Source:UniProtKB/Swiss-Prot;Acc:Q07157]|15|ENSG00000104067|ENST00000346128	7		0.457175	14.5087	0.76766	-;1;1	-;1;1	15.3508	1.66054	-;1;1	5.78	5	9	27	2.26293e+07	59.08	4.12	6	7	102.55	5.32	8	11	62.36	4.63	7	9	1748	195.34	6.69775
	ENSP00000362584	RBBP4 HGNC Symbol|retinoblastoma binding protein 4 [Source:HGNC Symbol;Acc:9887]|ENSG00000162521|1|ENST00000373485	3	28.6197	0.961011	56.6481	0.767668	2;1;1	2;1;1	40.1123	0.745063	2;1;1	22.44	12	3	16	3.07382e+07	141.577	22.44	3	3	158.92	22.44	3	10	92.4733	13.66	2	3	410	46.1296	5.07178
	ENSP00000311113	JUP HGNC Symbol|junction plakoglobin [Source:HGNC Symbol;Acc:6207]|ENSG00000173801|17|ENST00000310706	10	53.5512	0.95398		0.768089	1;-;1	1;-;1	47.2517	0.67718	1;-;2	25.5	5	12	88	5.6781e+07	698.006	15.57	9	32	455.31	12.35	7	25	463.109	23.62	11	31	745	81.6927	6.13818
	ENSP00000441682	PSME3 HGNC Symbol|proteasome (prosome, macropain) activator subunit 3 (PA28 gamma; Ki) [Source:HGNC Symbol;Acc:9570]|ENSG00000131467|17|ENST00000545225	6	12.1855	1.12886	10.1809	0.769275	1;6;5	1;6;5	19.1162	0.69468	1;6;5	41.45	3	7	50	6.54988e+07	100.734	20.73	3	10	230.893	38.86	6	20	293.938	41.45	7	20	193	22.4408	6.80029
	ENSP00000441536	ATP6AP2 HGNC Symbol|ATPase, H+ transporting, lysosomal accessory protein 2 [Source:HGNC Symbol;Acc:18305]|X|ENSG00000182220|ENST00000535777	1		0.692245	17.3356	0.770507	-;1;1	-;1;1	6.48324	1.07169	-;1;1	2.57	4	1	4	3.27534e+06					51.09	2.57	1	2	51.66	2.57	1	2	272	30.3149	6.69775
	ENSP00000232125	FAM162A HGNC (curated)|UPF0389 protein FAM162A (E2-induced gene 5 protein) [Source:UniProtKB/Swiss-Prot;Acc:Q96A26]|3|ENSG00000114023|ENST00000232125	2		0.778543		0.77104	-;-;2	-;-;2		0.954724	-;-;2	22.92	3	2	3	2.56849e+07									36.62	22.92	2	3	144	16.5047	9.77393
	ENSP00000440761	PDHA1 HGNC Symbol|pyruvate dehydrogenase (lipoamide) alpha 1 [Source:HGNC Symbol;Acc:8806]|ENSG00000131828|X|ENST00000540249	11	35.1603	0.91437	41.9995	0.771463	7;5;4	7;5;4	13.0984	0.87338	7;5;4	57.94	10	19	167	7.31152e+07	1058.56	53.76	17	58	972.931	57.94	18	63	853.649	40.39	12	46	359	40.1621	8.27979
	ENSP00000377939	UGP2 HGNC Symbol|UDP-glucose pyrophosphorylase 2 [Source:HGNC Symbol;Acc:12527]|2|ENSG00000169764|ENST00000394417	6	27.1095	0.757098	22.1188	0.772305	4;5;4	4;5;4	7.4741	1.05497	4;5;4	20.72	9	6	32	2.10255e+07	60.1958	10.66	4	9	74.1514	15.9	4	11	61.6386	18.71	5	12	497	55.6421	7.88428
	ENSP00000300107	CLPX HGNC Symbol|ClpX caseinolytic peptidase X homolog (E. coli) [Source:HGNC Symbol;Acc:2088]|ENSG00000166855|15|ENST00000300107	2	5.20207	1.18708		0.772863	1;-;1	1;-;1	16.8478	0.648156	1;-;1	7.58	2	4	8	7.93732e+06	25.38	3.16	2	3					22.19	5.21	3	5	633	69.1807	7.57666
	ENSP00000361771	SET HGNC Symbol|SET nuclear oncogene [Source:HGNC Symbol;Acc:10760]|ENSG00000119335|9|ENST00000372686	4	23.405	1.08528	7.59595	0.773823	2;15;12	2;15;12	22.9467	0.708518	2;15;12	29.81	5	4	49	5.58614e+07	70.6	7.92	2	2	470.164	29.81	4	22	479.169	29.81	4	25	265	30.9742	4.23389
	ENSP00000356290	MTHFD1L HGNC (curated)|Monofunctional C1-tetrahydrofolate synthase, mitochondrial Precursor (EC 6.3.4.3)(Formyltetrahydrofolate synthetase) [Source:UniProtKB/Swiss-Prot;Acc:Q6UB35]|6|ENSG00000120254|ENST00000367321	12	46.0327	0.851154	21.1249	0.774659	6;6;3	6;6;3	16.5387	0.939407	6;6;3	18.92	7	14	68	2.69257e+07	259.143	14.72	11	25	303.944	15.13	11	22	249.791	12.17	10	21	978	105.724	8.06006
	ENSP00000290378	ACTC1 HGNC (curated)|Actin, alpha cardiac muscle 1 (Alpha-cardiac actin) [Source:UniProtKB/Swiss-Prot;Acc:P68032]|15|ENSG00000159251|ENST00000290378	1	13.3112	0.983183	6.81791	0.774905	9;11;3	9;11;3	10.61	0.781969	9;11;3	38.73	16	8	1300	4.17017e+09	6237.67	38.73	7	398	6996.35	38.73	8	449	7396.36	38.73	8	453	377	41.9919	5.38916
	ENSP00000407952	NAMPTL HGNC Symbol|nicotinamide phosphoribosyltransferase-like [Source:HGNC Symbol;Acc:17633]|ENSG00000229644|10|ENST00000440465	2	22.8639	0.663162	19.0773	0.776311	2;2;5	2;2;5	6.17482	1.13586	2;2;5	13.77	8	5	38	2.59793e+07	89.2758	13.77	5	11	96.1191	13.77	5	11	128.282	10.81	4	16	472	53.3596	7.79639
	ENSP00000269321	ARHGDIA HGNC (automatic)|Rho GDP-dissociation inhibitor 1 (Rho GDI 1)(Rho-GDI alpha) [Source:UniProtKB/Swiss-Prot;Acc:P52565]|17|ENSG00000141522|ENST00000269321	5	27.4507	0.919091	28.7658	0.777858	10;13;13	10;13;13	18.1627	0.848615	10;13;13	29.9	2	5	62	6.93723e+07	123.673	21.08	4	13	176.1	29.9	5	26	122.543	29.9	5	23	204	23.1927	5.10986
	ENSP00000344848	PLEC1 HGNC (automatic)|Plectin-1 (PLTN)(PCN)(Hemidesmosomal protein 1)(HD1) [Source:UniProtKB/Swiss-Prot;Acc:Q15149]|8|ENSG00000178209|ENST00000345136	3	16.7577	0.477347	23.0269	0.77836	1;1;1	1;1;1	27.3046	1.62889	1;1;1	69.41	41	256	3113	3.22316e+08	11151.1	59.23	214	781	16597.7	64.09	237	1128	19709.9	68.66	248	1204	4547	515.884	5.79541
	ENSP00000375938	TUBA1 HGNC (curated)|Tubulin alpha-4A chain (Tubulin alpha-1 chain)(Alpha-tubulin 1)(Testis-specific alpha-tubulin)(Tubulin H2-alpha) [Source:UniProtKB/Swiss-Prot;Acc:P68366]|2|ENSG00000127824|ENST00000392088	3	34.565	0.953454	29.221	0.779451	2;2;4	2;2;4	17.9457	0.828853	2;2;4	45.5	10	12	519	1.02341e+09	3348.83	41.8	11	144	3978.58	41.8	11	183	4456.26	45.5	12	192	433	48.2976	5.0083
	ENSP00000396704	TOP2B HGNC Symbol|topoisomerase (DNA) II beta 180kDa [Source:HGNC Symbol;Acc:11990]|3|ENSG00000077097|ENST00000435706	12	45.3186	1.02257	37.194	0.779464	2;4;2	2;4;2	8.92657	0.773143	2;4;2	6.85	8	12	40	2.63849e+07	171.78	4.57	10	14	157.708	5.24	9	14	168.613	4.32	7	12	1621	182.548	8.06006
	ENSP00000421881	REEP5 HGNC Symbol|receptor accessory protein 5 [Source:HGNC Symbol;Acc:30077]|ENSG00000129625|5|ENST00000504247	1		0.461195		0.779852	-;1;-	-;1;-		1.63708	-;1;-	23.23	5	1	7	3.57761e+07					95.8	23.23	1	4	76.96	23.23	1	3	99	10.5693	8.38232
	ENSP00000353467	FLNA HGNC (curated)|Filamin-A (Alpha-filamin)(Filamin-1)(Endothelial actin-binding protein)(Actin-binding protein 280)(ABP-280)(Non-muscle filamin) [Source:UniProtKB/Swiss-Prot;Acc:P21333]|X|ENSG00000196924|ENST00000360319	8	11.7986	0.797078	15.8427	0.780981	3;9;9	3;9;9	9.23145	1.01517	3;9;9	32.63	8	45	821	5.47707e+08	3897.39	31.07	44	229	5228.9	31.26	44	289	5641.37	29.29	41	303	2639	279.843	6.04932
	ENSP00000362413	PGK1 HGNC (curated)|Phosphoglycerate kinase 1 (EC 2.7.2.3)(Primer recognition protein 2)(PRP 2)(Cell migration-inducing gene 10 protein) [Source:UniProtKB/Swiss-Prot;Acc:P00558]|X|ENSG00000102144|ENST00000373316	6	24.1354	0.800198	5.19065	0.781695	19;24;15	19;24;15	30.046	1.0561	19;24;15	28.3	5	6	296	2.04763e+08	1723.96	28.3	6	85	1245.79	28.3	6	89	1768.73	28.3	6	122	417	44.5861	8.104
	ENSP00000307387	PDCD6IP HGNC Symbol|programmed cell death 6 interacting protein [Source:HGNC Symbol;Acc:8766]|ENSG00000170248|3|ENST00000307296	12	17.2868	0.671547	4.72351	0.784529	8;9;15	8;9;15	12.8428	1.18237	8;9;15	19.47	5	12	87	4.18578e+07	306.967	12.1	7	24	368.6	13.59	9	25	622.513	18.66	11	38	868	95.9631	6.52197
	ENSP00000265384	TJP2 HGNC (curated)|Tight junction protein ZO-2 (Zonula occludens protein 2)(Zona occludens protein 2)(Tight junction protein 2) [Source:UniProtKB/Swiss-Prot;Acc:Q9UDY2]|9|ENSG00000119139|ENST00000265384	6		0.868584		0.785298	-;2;-	-;2;-		0.875315	-;2;-	7.25	6	10	18	2.39735e+07					63.66	6.45	9	10	31.19	5.64	7	8	993	111.594	7.45947
	ENSP00000423588	CANX HGNC Symbol|calnexin [Source:HGNC Symbol;Acc:1473]|ENSG00000127022|5|ENST00000512607	2	18.561	0.91188	21.128	0.785624	8;7;5	8;7;5	13.5101	0.837639	8;7;5	4.75	6	2	70	1.6361e+08	404.75	4.75	2	27	317.158	4.75	2	22	333.923	4.75	2	21	484	55.5631	4.70361
	ENSP00000307078	KIF5B HGNC Symbol|kinesin family member 5B [Source:HGNC Symbol;Acc:6324]|ENSG00000170759|10|ENST00000302418	10	20.2244	0.845277	8.43718	0.786835	2;4;4	2;4;4	14.2526	0.923403	2;4;4	13.91	7	10	57	1.20087e+07	255.552	8.1	6	13	363.631	13.29	9	21	407.983	9.76	8	23	963	109.617	6.50732
	ENSP00000356914	STX7 HGNC Symbol|syntaxin 7 [Source:HGNC Symbol;Acc:11442]|ENSG00000079950|6|ENST00000367937	3	63.4646	0.528655	71.7203	0.787013	1;1;1	1;1;1	18.1626	1.43829	1;1;1	14.64	2	3	17	1.00759e+07	133.58	9.21	2	5	84.6	9.21	2	5	151.693	14.64	3	7	239	27.3837	5.12256
	ENSP00000444555	TEX10 HGNC Symbol|testis expressed 10 [Source:HGNC Symbol;Acc:25988]|9|ENSG00000136891|ENST00000535814	4		0.713497		0.78714	-;1;-	-;1;-		1.06807	-;1;-	6.02	4	4	7	7.08017e+06	95.94	4.38	3	4	57.8142	3.61	2	2	41.75	1.97	1	1	913	103.85	9.36377
	ENSP00000429779	DECR1 HGNC Symbol|2,4-dienoyl CoA reductase 1, mitochondrial [Source:HGNC Symbol;Acc:2753]|ENSG00000104325|8|ENST00000522161	3	32.3065	0.906657	20.4035	0.787191	2;4;5	2;4;5	12.7617	0.89069	2;4;5	14.11	2	3	19	3.22248e+07	45.11	9.82	2	2	141.125	14.11	3	9	118.99	14.11	3	8	326	34.9722	8.89502
	ENSP00000363011	PSMD5 HGNC Symbol|proteasome (prosome, macropain) 26S subunit, non-ATPase, 5 [Source:HGNC Symbol;Acc:9563]|ENSG00000095261|9|ENST00000373904	8	12.5291	0.757198		0.787931	4;-;1	4;-;1	22.394	0.971025	4;-;1	26.9	4	8	26	2.09826e+07	187.63	26.9	8	11	124	14.75	5	8	82.19	15.62	5	7	461	51.2798	5.43994
	ENSP00000407516	SLC3A2 HGNC Symbol|solute carrier family 3 (activators of dibasic and neutral amino acid transport), member 2 [Source:HGNC Symbol;Acc:11026]|ENSG00000168003|11|ENST00000422606	7	28.4591	0.673137	29.2204	0.788333	2;1;2	2;1;2	7.84361	1.1555	2;1;2	21.14	10	8	32	2.09833e+07	149.085	21.14	8	11	120.996	15.85	6	10	140.51	12.72	5	11	511	55.9047	5.17334
	ENSP00000279247	CAPN1 HGNC Symbol|calpain 1, (mu/I) large subunit [Source:HGNC Symbol;Acc:1476]|ENSG00000014216|11|ENST00000279247	11	35.479	0.719474	45.7026	0.790137	2;2;2	2;2;2	9.16609	1.05841	2;2;2	19.33	13	12	32	1.65536e+07	97.4545	9.1	7	8	102.635	11.9	9	11	157.41	14.57	9	13	714	81.8382	5.66846
	ENSP00000351177	LONP1 HGNC (automatic)|Lon protease homolog, mitochondrial Precursor (EC 3.4.21.-)(Lon protease-like protein)(LONP)(LONHs)(Mitochondrial ATP-dependent protease Lon)(Serine protease 15) [Source:UniProtKB/Swiss-Prot;Acc:P36776]|19|ENSG00000196365|ENST00000358403	19	17.0199	0.7661	7.42219	0.790231	9;9;8	9;9;8	8.08912	1.05155	9;9;8	31.64	3	21	102	3.13357e+07	290.344	23.84	16	33	320.186	24.59	16	33	368.031	26.54	18	36	923	103.04	6.66846
	ENSP00000386524	SSB HGNC Symbol|Sjogren syndrome antigen B (autoantigen La) [Source:HGNC Symbol;Acc:11316]|ENSG00000138385|2|ENST00000409005	6	15.9018	0.842297	12.3566	0.790589	8;10;9	8;10;9	14.0924	0.935095	8;10;10	32.13	6	6	87	6.69339e+07	491.68	23.55	5	29	468.752	32.13	6	27	554.13	32.13	6	31	361	41.7987	5.96045
	ENSP00000354436	PAPSS2 HGNC Symbol|3'-phosphoadenosine 5'-phosphosulfate synthase 2 [Source:HGNC Symbol;Acc:8604]|ENSG00000198682|10|ENST00000361175	5	28.6326	0.934641	26.3602	0.791919	2;3;2	2;3;3	24.4154	0.801587	2;3;2	15.31	4	7	26	6.91665e+06	21.52	4.56	3	4	43.6967	4.56	3	5	74.5352	14.33	6	17	614	69.4566	8.03076
	ENSP00000387263	TSN HGNC Symbol|translin [Source:HGNC Symbol;Acc:12379]|2|ENSG00000211460|ENST00000409193	4		0.92593	20.1152	0.793233	-;1;2	-;1;2	23.4593	0.871688	-;1;2	14.35	5	4	7	3.32294e+06					40.6394	9.87	3	3	50.5659	14.35	4	4	223	25.5565	6.88818
	ENSP00000262854	HUWE1 HGNC (curated)|E3 ubiquitin-protein ligase HUWE1 (EC 6.3.2.-)(HECT, UBA and WWE domain-containing protein 1)(Upstream regulatory element-binding protein 1)(URE-binding protein 1)(URE-B1)(Mcl-1 ubiquitin ligase E3)(Mule)(ARF-binding protein 1)(ARF-BP1)(Large structure of UREB1)(LASU1)(Homologous to E6AP carboxyl terminus homologous protein 9)(HectH9) [Source:UniProtKB/Swiss-Prot;Acc:Q7Z6Z7]|…	11		0.717257	13.1796	0.794155	-;1;1	-;1;1	17.5487	1.07375	-;1;1	3.98	4	13	29	1.60812e+07	195.09	1.69	4	6	179.115	2.7	8	11	145.416	2.22	8	12	4374	481.589	5.22412
	ENSP00000249269	PMPCB HGNC (curated)|Mitochondrial-processing peptidase subunit beta Precursor (EC 3.4.24.64)(Beta-MPP)(P-52) [Source:UniProtKB/Swiss-Prot;Acc:O75439]|7|ENSG00000105819|ENST00000249269	10	10.3869	1.22194	26.8457	0.79416	5;2;2	5;2;2	23.9534	0.638399	5;2;2	28.83	4	10	54	2.00007e+07	402.85	28.83	10	22	322.953	19.43	7	16	370.757	13.5	6	16	489	54.3315	6.82959
	ENSP00000301522	PRDX2 HGNC Symbol|peroxiredoxin 2 [Source:HGNC Symbol;Acc:9353]|ENSG00000167815|19|ENST00000301522	6	31.7745	1.02342	23.3729	0.794734	3;10;10	3;10;10	10.1903	0.727464	3;10;10	45.96	2	7	70	1.75645e+08	122.486	15.15	3	12	546.276	45.45	6	26	544.266	45.96	7	32	198	21.8782	5.97314
	ENSP00000384654	COMT HGNC Symbol|catechol-O-methyltransferase [Source:HGNC Symbol;Acc:2228]|ENSG00000093010|22|ENST00000407537	6		0.622295	9.53378	0.795197	-;1;1	-;1;1	7.41624	1.23357	-;1;1	44.34	5	6	35	9.01251e+07	146.198	32.13	4	10	209.892	44.34	6	11	339.134	44.34	6	14	221	24.4334	5.32568
	ENSP00000353046	PRPF40A HGNC Symbol|PRP40 pre-mRNA processing factor 40 homolog A (S. cerevisiae) [Source:HGNC Symbol;Acc:16463]|ENSG00000196504|2|ENST00000359961	4	55.3073	1.02594	38.2803	0.795336	7;5;3	7;5;3	11.8508	0.866056	7;5;3	6.99	4	4	24	8.12702e+06	89.9629	5.02	3	9	50.18	5.02	3	6	109.123	6.99	4	9	816	92.915	8.27979
	ENSP00000444421	REXO2 HGNC Symbol|REX2, RNA exonuclease 2 homolog (S. cerevisiae) [Source:HGNC Symbol;Acc:17851]|ENSG00000076043|11|ENST00000539119	4		0.947358	6.02332	0.796972	-;1;3	-;1;3	5.44935	0.828179	-;1;3	29.17	12	4	10	1.6778e+07					107.52	14.06	2	4	175.933	29.17	4	6	192	22.1022	8.23584
	ENSP00000360143	GNAS HGNC (curated)|Guanine nucleotide-binding protein G(s) subunit alpha isoforms XLas (Adenylate cyclase-stimulating G alpha protein)(Extra large alphas protein)(XLalphas) [Source:UniProtKB/Swiss-Prot;Acc:Q5JWF2]|20|ENSG00000087460|ENST00000371102	6		0.753582	1.21333	0.796988	-;1;1	-;1;1	14.1265	1.03094	-;1;1	6.94	7	9	32	9.91078e+08	54.03	4.3	5	9	87.8167	5.87	7	12	105.643	5.96	6	11	1023	109.558	5.07178
	ENSP00000226299	LAP3 HGNC Symbol|leucine aminopeptidase 3 [Source:HGNC Symbol;Acc:18449]|ENSG00000002549|4|ENST00000226299	6	5.87509	0.989642	7.69829	0.798206	1;3;2	1;3;2	11.3553	0.845853	1;3;2	15.03	3	7	28	1.95489e+07	129.85	10.79	5	9	138.227	15.03	7	9	100.705	11.75	6	10	519	56.1308	7.92822
	ENSP00000439252	CCAR1 HGNC Symbol|cell division cycle and apoptosis regulator 1 [Source:HGNC Symbol;Acc:24236]|ENSG00000060339|10|ENST00000539539	10	67.8761	0.827235	53.2273	0.799657	3;3;4	3;3;4	11.7693	0.999015	3;3;4	11.89	8	12	40	1.31147e+07	111.164	10.64	11	15	129.203	7.48	8	12	85.0019	10.74	11	13	1043	120.351	5.92236
	ENSP00000440609	KPNA6 HGNC Symbol|karyopherin alpha 6 (importin alpha 7) [Source:HGNC Symbol;Acc:6399]|ENSG00000025800|1|ENST00000545542	4	20.8309	0.932992	27.6952	0.80008	1;3;2	1;3;2	10.3284	0.839532	1;3;2	21.81	5	7	28	1.46457e+07	159.36	10.91	4	7	147.33	12.01	5	11	144.619	12.2	5	10	541	60.5557	5.021
	ENSP00000438954	ACP2 HGNC Symbol|acid phosphatase 2, lysosomal [Source:HGNC Symbol;Acc:123]|ENSG00000134575|11|ENST00000540414	7	40.3647	0.976782	36.8125	0.800199	2;1;1	2;1;1	10.5256	0.819501	2;1;1	15.01	12	7	21	1.21426e+07	82.6617	12.35	6	8	42.72	7.75	4	5	105.308	12.35	6	8	413	47.0948	6.68311
	ENSP00000446476	PPIA HGNC Symbol|peptidylprolyl isomerase A (cyclophilin A) [Source:HGNC Symbol;Acc:9253]|ENSG00000196262|7|ENST00000395070	4	29.2054	1.0416	38.0203	0.80147	8;18;19	8;18;19	16.0009	0.74523	8;18;19	51.94	6	4	128	6.0413e+08	190.232	38.76	3	20	787.763	51.94	4	51	1099.39	51.94	4	57	129	14.076	8.47021
	ENSP00000303351	ITGB1 HGNC (curated)|Integrin beta-1 Precursor (Fibronectin receptor subunit beta)(Integrin VLA-4 subunit beta)(CD29 antigen) [Source:UniProtKB/Swiss-Prot;Acc:P05556]|10|ENSG00000150093|ENST00000302278	10	20.0421	0.71384	17.2421	0.801825	32;30;24	32;30;24	13.0218	1.07292	32;30;24	19.8	13	10	255	9.81263e+07	1413.52	19.05	9	91	1435.11	17.17	8	84	1358.35	17.92	9	80	798	88.357	5.38916
	ENSP00000371230	AK3 HGNC Symbol|adenylate kinase 3 [Source:HGNC Symbol;Acc:17376]|ENSG00000147853|9|ENST00000381809	7		1.12144	1.89963	0.804045	-;3;4	-;3;4	1.58891	0.699889	-;3;4	59.03	3	7	21	4.57261e+07					140.264	24.67	4	7	201.535	59.03	7	14	227	25.5495	9.15869
	ENSP00000405984	GLG1 HGNC Symbol|golgi glycoprotein 1 [Source:HGNC Symbol;Acc:4316]|ENSG00000090863|16|ENST00000422840	19	25.2022	0.716813	5.09457	0.804391	7;6;4	7;6;4	10.1118	1.19114	7;6;4	18.24	4	19	134	3.08762e+07	739.236	14.5	16	49	573.538	16.79	18	44	585.367	13.23	14	41	1179	134.464	6.90283
	ENSP00000379672	TUBB HGNC (curated)|Tubulin beta chain (Tubulin beta-5 chain) [Source:UniProtKB/Swiss-Prot;Acc:P07437]|6|ENSG00000196230|ENST00000396389	3	33.227	0.919286	31.9298	0.805054	17;21;17	17;21;17	11.6549	0.845976	17;21;17	66.2	13	15	610	1.51462e+09	4044.96	66.2	15	179	4393	66.2	14	209	5252.2	66.2	15	222	426	47.736	4.80518
	ENSP00000331487	NPLOC4 HGNC Symbol|nuclear protein localization 4 homolog (S. cerevisiae) [Source:HGNC Symbol;Acc:18261]|ENSG00000182446|17|ENST00000331134	4	6.18403	1.02847	8.16812	0.805308	1;1;1	1;1;1	1.52686	0.771619	1;1;1	6.74	3	4	28	1.17195e+07	31.0433	6.74	4	7	58.7933	6.74	4	9	91.09	6.74	4	12	608	68.0769	6.37939
	ENSP00000344913	ZNF207 HGNC Symbol|zinc finger protein 207 [Source:HGNC Symbol;Acc:12998]|ENSG00000010244|17|ENST00000341711	1		0.837395		0.805921	-;1;-	-;1;-		0.931759	-;1;-	2.03	6	1	2	7.49352e+06					23.85	2.03	1	2					395	41.5318	9.94971
	ENSP00000395899	MTA1 HGNC Symbol|metastasis associated 1 [Source:HGNC Symbol;Acc:7410]|ENSG00000182979|14|ENST00000414153	5	91.4261	0.81493	64.3746	0.805961	2;1;-	2;1;-		1.18702	2;1;-	13.22	8	8	25	8.53108e+06	85.7467	10.35	6	10	103.8	9.55	5	7	41.69	8.92	6	8	628	70.8655	9.59814
	ENSP00000261479	PSMA6 HGNC Symbol|proteasome (prosome, macropain) subunit, alpha type, 6 [Source:HGNC Symbol;Acc:9535]|ENSG00000100902|14|ENST00000261479	3	23.7164	1.19724	9.2176	0.806911	1;1;1	1;1;1	22.3148	0.687383	1;1;1	20.33	10	3	18	2.43426e+07	84.83	20.33	3	6	124.303	20.33	3	7	103.22	13.01	2	5	246	27.3818	6.75635
	ENSP00000317331	SSR4 HGNC (curated)|Translocon-associated protein subunit delta Precursor (TRAP-delta)(Signal sequence receptor subunit delta)(SSR-delta) [Source:UniProtKB/Swiss-Prot;Acc:P51571]|X|ENSG00000180879|ENST00000320857	4	9.94643	1.15055	7.81412	0.807496	4;3;1	4;3;1	8.7435	0.672608	4;3;1	39.88	3	4	42	1.07864e+08	252.911	39.88	4	13	289.733	39.88	4	13	408.76	39.88	4	16	173	18.9866	6.15088
	ENSP00000442427	DLAT HGNC Symbol|dihydrolipoamide S-acetyltransferase [Source:HGNC Symbol;Acc:2896]|ENSG00000150768|11|ENST00000537636	4	5.03344	0.882307	14.9551	0.80772	3;2;4	3;2;4	7.04516	0.932433	3;2;4	15.55	4	4	19	1.37677e+07	119.78	15.55	4	6	124.32	8.61	3	6	149.69	15.55	4	7	418	44.6336	6.44287
	ENSP00000243563	SNRPA HGNC Symbol|small nuclear ribonucleoprotein polypeptide A [Source:HGNC Symbol;Acc:11151]|ENSG00000077312|19|ENST00000243563	2		0.965294	28.4932	0.808869	-;1;3	-;1;3	21.4368	0.879782	-;1;3	13.83	1	2	7	1.41862e+07					45.5196	13.83	2	4	68.7173	13.83	2	3	282	31.2592	9.83252
	ENSP00000383191	COL18A1 HGNC (curated)|Collagen alpha-1(XVIII) chain Precursor [Contains Endostatin] [Source:UniProtKB/Swiss-Prot;Acc:P39060]|21|ENSG00000182871|ENST00000400337	10	29.2065	1.38957	32.5585	0.808893	2;1;1	2;1;1	10.4318	0.57367	2;1;1	9.56	7	10	43	3.99679e+07	285.306	9.56	10	13	354.747	8.51	9	18	268.923	7.77	8	12	1339	135.677	6.46826
	ENSP00000407366	SMS HGNC Symbol|spermine synthase [Source:HGNC Symbol;Acc:11123]|ENSG00000102172|X|ENST00000457085	2		1.13376	17.0947	0.808919	-;1;1	-;1;1	36.43	0.715497	-;1;1	9.97	6	3	17	4.50358e+07	28.17	6.43	2	3	54.6	9.97	3	7	59.6467	9.97	3	7	311	33.457	5.60498
	ENSP00000371310	USP7 HGNC Symbol|ubiquitin specific peptidase 7 (herpes virus-associated) [Source:HGNC Symbol;Acc:12630]|16|ENSG00000187555|ENST00000381886	13	49.043	0.813513	37.2907	0.811714	5;3;1	5;3;1	11.2512	0.959614	5;3;1	17.86	14	14	65	8.06344e+06	180.512	15.93	13	26	153.093	13.17	11	17	199.772	11.51	10	22	1086	126.189	5.70654
	ENSP00000269980	BCKDHA HGNC Symbol|branched chain keto acid dehydrogenase E1, alpha polypeptide [Source:HGNC Symbol;Acc:986]|ENSG00000248098|19|ENST00000269980	4		0.976785		0.812195	1;-;-	1;-;-		0.854674	1;-;-	10.56	5	5	7	2.11435e+06	64.67	10.56	5	5	22.69	4.72	2	2					445	50.4392	8.26514
	ENSP00000373083	USP14 HGNC Symbol|ubiquitin specific peptidase 14 (tRNA-guanine transglycosylase) [Source:HGNC Symbol;Acc:12612]|ENSG00000101557|18|ENST00000383589	10	13.9767	0.870539	11.7162	0.812531	6;5;4	6;5;4	5.19039	0.907435	6;5;4	29.41	3	10	62	2.92725e+07	277.135	25.93	9	21	298.015	24.4	9	19	447.163	29.41	10	22	459	52.3523	5.78271
	ENSP00000345917	LYAR HGNC Symbol|Ly1 antibody reactive homolog (mouse) [Source:HGNC Symbol;Acc:26021]|ENSG00000145220|4|ENST00000343470	4		0.761291	4.87004	0.813263	-;2;1	-;2;1	3.87691	1.03392	-;2;1	13.72	1	4	6	1.11572e+07					53.14	9.5	3	3	52.3733	11.87	3	3	379	43.5879	9.53955
	ENSP00000365803	CPT1A HGNC (automatic)|Carnitine O-palmitoyltransferase 1, liver isoform (CPT1-L)(EC 2.3.1.21)(Carnitine O-palmitoyltransferase I, liver isoform)(CPTI-L)(CPT I)(Carnitine palmitoyltransferase 1A) [Source:UniProtKB/Swiss-Prot;Acc:P50416]|11|ENSG00000110090|ENST00000376618	10	19.9537	0.965923	21.773	0.813931	1;1;2	1;1;2	5.40842	0.829252	1;1;2	16.27	3	11	31	4.50454e+07	165.427	15.61	10	11	183.28	12.83	10	10	208.152	12.17	9	10	756	86.1836	8.44092
	ENSP00000363358	SH3BGRL3 HGNC Symbol|SH3 domain binding glutamic acid-rich protein like 3 [Source:HGNC Symbol;Acc:15568]|ENSG00000142669|1|ENST00000319041	2		0.818868	17.317	0.813993	-;1;1	-;1;1	15.4195	0.958879	-;1;1	42.05	3	4	8	6.44084e+06					81.42	35.23	3	4	92.0467	30.68	3	4	88	9.37476	9.36377
	ENSP00000370023	HADHA HGNC Symbol|hydroxyacyl-CoA dehydrogenase/3-ketoacyl-CoA thiolase/enoyl-CoA hydratase (trifunctional protein), alpha subunit [Source:HGNC Symbol;Acc:4801]|ENSG00000084754|2|ENST00000380649	14	16.3615	0.924806	2.45012	0.814309	50;48;42	50;48;42	15.6424	0.848633	50;48;42	34.86	3	14	297	1.2611e+08	1370.92	34.86	14	106	1034.81	34.86	14	97	1138.6	34.86	14	94	763	82.9469	9.0415
	ENSP00000266732	TMPO HGNC (automatic)|Lamina-associated polypeptide 2, isoforms beta/gamma (Thymopoietin, isoforms beta/gamma)(TP beta/gamma)(Thymopoietin-related peptide isoforms beta/gamma)(TPRP isoforms beta/gamma) [Contains Thymopoietin(TP)(Splenin);Thymopentin(TP5)] [Source:UniProtKB/Swiss-Prot;Acc:P42167]|12|ENSG00000120802|ENST00000266732	2		0.96496		0.81495	1;-;-	1;-;-		0.868083	1;-;-	16.43	1	7	31	2.1134e+07	102.465	13.4	5	9	132.014	14.55	6	12	173.661	9.51	5	10	694	75.4456	7.66455
	ENSP00000349324	TNFRSF10C HGNC Symbol|tumor necrosis factor receptor superfamily, member 10c, decoy without an intracellular domain [Source:HGNC Symbol;Acc:11906]|ENSG00000173535|8|ENST00000356864	2	51.594	1.23916		0.815013	1;-;2	1;-;2	13.2285	0.6419	1;-;2	8.88	3	2	12	1.03487e+06	39.41	8.88	2	5	35.12	3.47	1	2	92.65	8.88	2	5	259	27.3888	4.81787
	ENSP00000216554	EIF5 HGNC Symbol|eukaryotic translation initiation factor 5 [Source:HGNC Symbol;Acc:3299]|ENSG00000100664|14|ENST00000216554	3	42.0443	1.14762	41.3306	0.815092	1;2;2	1;2;2	8.46242	0.70019	1;2;2	8.82	7	3	11	1.05053e+07	23.5	4.18	2	3	47.79	8.82	3	4	84.02	8.82	3	4	431	49.1918	5.57959
	ENSP00000001008	FKBP4 HGNC Symbol|FK506 binding protein 4, 59kDa [Source:HGNC Symbol;Acc:3720]|12|ENSG00000004478|ENST00000001008	4		0.715021		0.815613	-;-;1	-;-;1		1.09964	-;-;1	12.2	2	4	8	1.41539e+07	49.52	6.54	2	2	55.95	9.8	3	3	68.24	8.93	3	3	459	51.7721	5.42725
	ENSP00000438440	PSMD13 HGNC Symbol|proteasome (prosome, macropain) 26S subunit, non-ATPase, 13 [Source:HGNC Symbol;Acc:9558]|ENSG00000185627|11|ENST00000538343	7		1.79676	30.2829	0.816436	-;1;2	-;1;2	75.2099	0.542809	-;1;2	32.8	7	7	13	2.24871e+07					110.71	20.58	4	5	126.686	32.8	6	8	311	35.3244	6.01123
	ENSP00000313420	PRKDC HGNC Symbol|protein kinase, DNA-activated, catalytic polypeptide [Source:HGNC Symbol;Acc:9413]|8|ENSG00000253729|ENST00000314191	67	38.9981	0.784012	28.1395	0.817101	23;26;30	23;26;30	9.1053	1.05383	23;27;30	24.28	4	74	358	1.05769e+08	1219.09	18.03	61	110	1212.39	18.37	59	112	1640.23	21.4	67	136	4127	468.675	7.12256
	ENSP00000361816	SPTAN1 HGNC Symbol|spectrin, alpha, non-erythrocytic 1 (alpha-fodrin) [Source:HGNC Symbol;Acc:11273]|ENSG00000197694|9|ENST00000372731	4	14.9858	0.687774	18.6152	0.817305	2;2;3	2;2;3	10.3141	1.17043	2;2;3	52.18	4	96	1195	1.13675e+08	4935.54	48.71	91	383	5629.15	50.49	92	425	5606.78	51.01	91	387	2472	284.364	5.35107
	ENSP00000279550	CSDAP1 HGNC (automatic)|DNA-binding protein A (Cold shock domain-containing protein A)(Single-strand DNA-binding protein NF-GMB) [Source:UniProtKB/Swiss-Prot;Acc:P16989]|12|ENSG00000060138|ENST00000279550	1		0.568142		0.817964	-;-;1	-;-;1		1.38791	-;-;1	44.88	2	7	69	3.86155e+07					449.248	25.41	5	34	493.207	33	6	35	303	31.928	9.65674
	ENSP00000303147	MAT2A HGNC Symbol|methionine adenosyltransferase II, alpha [Source:HGNC Symbol;Acc:6904]|ENSG00000168906|2|ENST00000306434	10	24.3879	0.857397	23.1958	0.818758	9;9;5	9;9;5	14.8812	0.911094	9;9;5	39.24	4	10	83	4.6753e+07	455.986	31.65	9	28	461.388	39.24	10	31	446.041	18.48	6	24	395	43.6333	6.48096
	ENSP00000431539	UBTF HGNC Symbol|upstream binding transcription factor, RNA polymerase I [Source:HGNC Symbol;Acc:12511]|ENSG00000108312|17|ENST00000527034	7	41.2642	0.956131	33.1568	0.819635	4;4;3	4;4;3	7.8483	0.876397	4;4;3	13.42	4	11	42	4.31925e+07	109.68	8.59	7	16	59.1133	8.72	7	14	58.64	11.01	9	12	745	87.3802	9.89111
	ENSP00000261714	BLMH HGNC Symbol|bleomycin hydrolase [Source:HGNC Symbol;Acc:1059]|17|ENSG00000108578|ENST00000261714	1	58.0585	1.20704	60.1573	0.819775	2;1;-	2;1;-		0.672483	2;1;-	5.27	1	1	5	6.98949e+06	37.1	5.27	1	4	22.12	5.27	1	1					455	52.528	6.26514
	ENSP00000325548	CNDP2 HGNC Symbol|CNDP dipeptidase 2 (metallopeptidase M20 family) [Source:HGNC Symbol;Acc:24437]|18|ENSG00000133313|ENST00000324262	4		1.17498	11.231	0.81998	-;1;1	-;1;1	24.0733	0.704071	-;1;1	10.74	2	4	6	8.06206e+06					80.23	5.89	2	2	133.78	9.26	3	4	475	52.8449	5.97314
	ENSP00000358727	GSTO1 HGNC Symbol|glutathione S-transferase omega 1 [Source:HGNC Symbol;Acc:13312]|ENSG00000148834|10|ENST00000369713	3		0.902826	12.6287	0.820044	-;5;5	-;5;5	31.5296	0.909072	-;5;5	19.5	5	4	17	2.95744e+07					131.206	17.43	3	8	165.412	19.5	4	9	241	27.548	6.59521
	ENSP00000341078	ITGA6 HGNC Symbol|integrin, alpha 6 [Source:HGNC Symbol;Acc:6142]|ENSG00000091409|2|ENST00000343713	5		0.844517	29.8907	0.820115	-;1;1	-;1;1	6.3732	0.948514	-;1;1	6.09	8	5	26	1.36103e+07	187.521	3.65	3	6	185.494	6.09	5	10	259.058	6.09	5	10	1068	119.014	7.26904
	ENSP00000431583	EIF4G2 HGNC Symbol|eukaryotic translation initiation factor 4 gamma, 2 [Source:HGNC Symbol;Acc:3297]|11|ENSG00000110321|ENST00000531416	6	87.5665	2.81947	80.1768	0.820513	2;3;3	2;3;3	35.8401	0.304661	2;3;3	13.06	4	6	13	2.20309e+07	29.48	5.86	2	2	49.85	10.36	5	6	36.7133	10.14	4	5	444	49.6206	9.18799
	ENSP00000414935	CD93 HGNC Symbol|CD93 molecule [Source:HGNC Symbol;Acc:15855]|ENSG00000125810|20|ENST00000413585	2	73.705	1.08135	38.5922	0.820607	2;1;1	2;1;1	53.4233	0.920671	2;1;1	5.19	2	2	12	1.49692e+07	99.2	5.19	2	5	69.0667	5.19	2	3	175.84	5.19	2	4	347	36.6066	6.29053
	ENSP00000423798	AGA HGNC Symbol|aspartylglucosaminidase [Source:HGNC Symbol;Acc:318]|4|ENSG00000038002|ENST00000502310	2		1.13882	11.121	0.82269	-;1;1	-;1;1	4.7065	0.696779	-;1;1	17.42	2	2	4	1.0779e+07					55.14	17.42	2	2	58.83	17.42	2	2	155	17.0444	6.26514
	ENSP00000432008	RIC8A HGNC Symbol|resistance to inhibitors of cholinesterase 8 homolog A (C. elegans) [Source:HGNC Symbol;Acc:29550]|ENSG00000177963|11|ENST00000526104	4		1.31412		0.823749	-;1;-	-;1;-		0.606875	-;1;-	9.79	6	4	11	4.01974e+06	34.89	7.72	3	3	76.57	9.79	4	4	48.1567	9.79	4	4	531	59.6715	5.32568
	ENSP00000358563	DKC1 HGNC Symbol|dyskeratosis congenita 1, dyskerin [Source:HGNC Symbol;Acc:2890]|ENSG00000130826|X|ENST00000369550	6	28.2494	1.09129	35.0039	0.82421	3;2;4	3;2;4	5.58579	0.742245	3;2;4	23.35	5	8	35	3.22594e+07	127.297	15.37	6	11	119.279	11.67	5	11	119.38	12.26	5	13	514	57.6378	9.42236
	ENSP00000445560	GBA HGNC Symbol|glucosidase, beta, acid [Source:HGNC Symbol;Acc:4177]|ENSG00000177628|1|ENST00000536770	5	31.1014	0.956684	51.4604	0.824285	3;3;2	3;3;2	22.4308	0.952412	3;3;2	21.75	6	6	56	4.43647e+07	229.41	21.75	6	20	236.537	21.75	6	18	282.16	14.66	5	18	423	47.5342	7.28369
	ENSP00000418993	BCAP29 HGNC Symbol|B-cell receptor-associated protein 29 [Source:HGNC Symbol;Acc:24131]|7|ENSG00000075790|ENST00000465919	2		1.21311	1.8499	0.825279	-;1;2	-;1;2	46.1305	0.731851	-;1;2	37.41	8	3	18	1.80952e+07					29.32	34.01	2	5	33.9567	37.41	3	13	147	17.3633	9.5249
	ENSP00000291552	U2AF1 HGNC Symbol|U2 small nuclear RNA auxiliary factor 1 [Source:HGNC Symbol;Acc:12453]|ENSG00000160201|21|ENST00000291552	4		1.02505	3.51453	0.827952	-;1;4	-;1;4	14.2161	0.784827	-;1;4	27.08	5	6	50	2.84536e+07	183.581	16.67	3	10	339.649	25	5	17	403.611	27.08	6	23	240	27.8545	8.80713
	ENSP00000353772	P4HA2 HGNC Symbol|prolyl 4-hydroxylase, alpha polypeptide II [Source:HGNC Symbol;Acc:8547]|ENSG00000072682|5|ENST00000360568	12	37.635	1.22444	23.3595	0.830227	9;9;9	9;9;9	16.0796	0.71922	9;9;9	33.21	8	14	91	3.11761e+07	411.248	33.21	13	32	375.2	32.08	13	27	403.273	32.08	13	32	533	60.5946	5.70654
	ENSP00000334156	SPTBN1 HGNC Symbol|spectrin, beta, non-erythrocytic 1 [Source:HGNC Symbol;Acc:11275]|ENSG00000115306|2|ENST00000333896	1	18.3545	0.844514	18.6131	0.830348	2;2;1	2;2;1	3.41022	0.969571	2;2;1	50.86	10	88	831	1.36914e+08	3821.51	44.83	74	265	4229.92	47.98	78	300	4360.83	47.61	78	266	2155	251.241	5.52881
	ENSP00000299218	CAND1 HGNC Symbol|cullin-associated and neddylation-dissociated 1 [Source:HGNC Symbol;Acc:30688]|12|ENSG00000111530|ENST00000299218	10	14.504	0.701642	10.8845	0.831569	7;4;5	8;4;5	21.0035	1.13392	7;4;5	10.98	6	11	56	1.16911e+07	141.594	4.63	6	20	95.5061	3.58	5	12	127.266	10.98	11	24	1230	136.289	5.78271
	ENSP00000274605	N4BP3 HGNC Symbol|NEDD4 binding protein 3 [Source:HGNC Symbol;Acc:29852]|5|ENSG00000145911|ENST00000274605	1		0.750025		0.831884	-;1;-	-;1;-		1.07381	-;1;-	2.76	1	2	2	1.1653e+07					0	2.76	2	2					544	60.4327	8.104
	ENSP00000406669	HNRNPH2 HGNC Symbol|heterogeneous nuclear ribonucleoprotein H2 (H') [Source:HGNC Symbol;Acc:5042]|ENSG00000126945|X|ENST00000457902	7	53.2419	0.849735	55.8577	0.832536	3;2;3	3;2;3	7.39884	0.935668	3;2;3	48.27	2	14	337	2.69614e+08	1955.52	39.85	12	109	1813.44	41.09	13	114	2303.83	47.03	13	114	404	44.4088	6.34131
	ENSP00000295685	ARPC2 HGNC Symbol|actin related protein 2/3 complex, subunit 2, 34kDa [Source:HGNC Symbol;Acc:705]|ENSG00000163466|2|ENST00000295685	8	22.9533	1.075	31.0198	0.832539	2;2;4	2;2;4	6.72691	0.750915	2;2;4	42.33	2	8	60	3.62039e+07	62.36	23.67	4	12	272.799	42.33	8	21	334.5	34.67	7	27	300	34.3115	7.35693
	ENSP00000346827	ALDH9A1 HGNC Symbol|aldehyde dehydrogenase 9 family, member A1 [Source:HGNC Symbol;Acc:412]|1|ENSG00000143149|ENST00000354775	5	3.62553	0.840593	11.6315	0.832786	4;2;2	4;2;2	9.42021	0.980394	4;2;2	15.25	2	5	28	1.7964e+07	132.655	15.25	5	11	119.956	9.27	3	8	114.737	12.93	4	9	518	56.2554	6.56592
	ENSP00000387651	GTF2I HGNC Symbol|general transcription factor IIi [Source:HGNC Symbol;Acc:4659]|ENSG00000077809|7|ENST00000416070	15	34.2576	0.944153	17.3648	0.833544	2;2;6	2;2;6	14.2292	0.914503	2;2;6	21.42	10	18	81	2.2402e+07	186.432	11.49	12	25	258.541	12.12	13	26	291.865	19.12	16	30	957	107.902	7.94287
	ENSP00000305647	VAMP5 HGNC Symbol|vesicle-associated membrane protein 5 (myobrevin) [Source:HGNC Symbol;Acc:12646]|ENSG00000168899|2|ENST00000306384	2		0.638621	17.0778	0.833562	-;1;1	-;1;1	1.99417	1.2588	-;1;1	19.83	1	2	5	6.77008e+06					164.74	19.83	2	3	99.16	19.83	2	2	116	12.7967	7.85498
	ENSP00000337688	SEC62 HGNC Symbol|SEC62 homolog (S. cerevisiae) [Source:HGNC Symbol;Acc:11846]|3|ENSG00000008952|ENST00000337002	4	11.7534	0.646157	7.99131	0.83372	4;2;2	4;2;2	4.94378	1.26773	4;2;2	12.78	3	4	19	1.2849e+07	57.34	12.78	4	10	29.38	9.27	3	4	28.48	9.27	3	5	399	45.8331	7.12256
	ENSP00000443782	RAB6A HGNC Symbol|RAB6A, member RAS oncogene family [Source:HGNC Symbol;Acc:9786]|11|ENSG00000175582|ENST00000541973	6		0.869785	5.89461	0.833958	-;3;2	-;3;2	1.14333	0.926102	-;3;2	45.27	20	7	34	5.12746e+07	51.49	14.93	3	6	119.644	45.27	7	13	205.579	45.27	7	15	201	22.7445	5.35107
	ENSP00000254630	PTCD3 HGNC Symbol|Pentatricopeptide repeat domain 3 [Source:HGNC Symbol;Acc:24717]|ENSG00000132300|2|ENST00000254630	4	15.197	0.795192	40.5524	0.835	1;1;-	1;1;-		1.10539	1;1;-	5.81	1	4	5	3.43984e+06	39.38	2.03	2	2	45.85	4.93	3	3					689	78.4997	6.41748
	ENSP00000342026	PRDX6 HGNC Symbol|peroxiredoxin 6 [Source:HGNC Symbol;Acc:16753]|ENSG00000117592|1|ENST00000340385	8	31.1916	1.25249	44.8064	0.835212	1;6;4	1;6;4	23.4269	0.626266	1;6;5	52.23	1	8	57	6.94476e+07	159.436	20.98	4	11	215.94	52.23	8	21	356.821	51.34	7	25	224	25.0192	6.37939
	ENSP00000321539	MRPL48 HGNC Symbol|mitochondrial ribosomal protein L48 [Source:HGNC Symbol;Acc:16653]|11|ENSG00000175581|ENST00000314282	2		1.2674		0.835464	-;-;2	-;-;2		0.635472	-;-;2	25.66	4	2	2	1.34528e+07									32.26	25.66	2	2	113	12.7616	5.23682
	ENSP00000341347	HM13 HGNC (curated)|Minor histocompatibility antigen H13 (EC 3.4.23.-)(Signal peptide peptidase)(Presenilin-like protein 3)(Protein hIMP1) [Source:UniProtKB/Swiss-Prot;Acc:Q8TCT9]|20|ENSG00000101294|ENST00000344042	1	14.571	0.762248	19.3807	0.836208	1;2;1	1;2;1	11.7774	1.08194	1;2;1	5.15	5	1	6	1.40705e+07	71.83	5.15	1	1	98.5467	5.15	1	3	77.68	5.15	1	2	272	30.1427	7.88428
	ENSP00000445764	STOM HGNC Symbol|stomatin [Source:HGNC Symbol;Acc:3383]|ENSG00000148175|9|ENST00000538954	9	20.8471	0.55475	16.7089	0.836236	2;4;6	2;4;6	7.5001	1.52513	2;4;6	65.4	3	9	62	8.36037e+07	353.698	54.01	8	17	381.431	65.4	9	21	507.636	65.4	9	24	237	25.9478	7.38623
	ENSP00000348577	RANGAP1 HGNC Symbol|Ran GTPase activating protein 1 [Source:HGNC Symbol;Acc:9854]|ENSG00000100401|22|ENST00000356244	8	21.5316	0.823098	20.9595	0.836264	4;2;3	4;2;3	15.1296	1.00129	4;2;3	26.75	5	9	21	1.41076e+07	155.16	18.91	6	9	45.46	9.37	4	6	131.877	11.07	5	6	587	63.5023	4.67822
	ENSP00000254286	ACTR10 HGNC Symbol|actin-related protein 10 homolog (S. cerevisiae) [Source:HGNC Symbol;Acc:17372]|14|ENSG00000131966|ENST00000254286	2		0.724467		0.838674	1;-;-	1;-;-		1.18991	1;-;-	4.56	7	2	3	2.96579e+06	20.84	4.56	2	2	21.51	1.68	1	1					417	46.2773	7.37158
	ENSP00000299427	TPP1 HGNC Symbol|tripeptidyl peptidase I [Source:HGNC Symbol;Acc:2073]|ENSG00000166340|11|ENST00000299427	8	25.8012	0.713438	24.1641	0.838986	8;8;9	8;8;9	2.5539	1.17879	8;8;9	25.58	3	8	168	3.77245e+08	1718.39	25.58	8	56	1534.6	21.14	7	52	1815.04	17.94	6	60	563	61.2096	6.48096
	ENSP00000308208	MMP14 HGNC Symbol|matrix metallopeptidase 14 (membrane-inserted) [Source:HGNC Symbol;Acc:7160]|ENSG00000157227|14|ENST00000311852	7	40.2974	0.960817	9.42544	0.840487	2;1;2	2;1;2	37.5284	0.958076	2;1;2	11.68	2	7	36	4.73226e+07	165.275	10.31	6	14	112.931	7.04	5	10	87.6885	9.28	5	12	582	65.852	7.76709
	ENSP00000396923	APP HGNC Symbol|amyloid beta (A4) precursor protein [Source:HGNC Symbol;Acc:620]|ENSG00000142192|21|ENST00000448850	13	31.0167	0.759964	15.561	0.840539	4;7;9	4;7;9	7.77433	1.11733	4;7;9	30.52	12	14	79	1.26977e+07	243.907	19.79	9	18	389.887	29.28	13	28	439.822	29.48	13	33	485	55.0571	4.81787
	ENSP00000369768	HSPH1 HGNC Symbol|heat shock 105kDa/110kDa protein 1 [Source:HGNC Symbol;Acc:16969]|ENSG00000120694|13|ENST00000380405	5	17.922	0.958689	15.019	0.841196	4;3;4	4;3;4	15.7637	0.898265	4;3;4	9.71	11	6	42	1.99276e+07	184.079	9.71	6	14	240.152	6.39	4	13	252.55	7.99	5	15	814	92.0574	5.5542
	ENSP00000271583	TOR1AIP1 HGNC (curated)|Torsin-1A-interacting protein 1 [Source:UniProtKB/Swiss-Prot;Acc:Q5JTV8]|1|ENSG00000143337|ENST00000271583	5	61.5305	0.892614	44.149	0.841216	3;3;1	3;3;1	22.4502	0.99449	3;3;1	22.98	5	11	72	5.46562e+07	354.902	21.96	10	28	321.874	20.75	9	23	293.388	20.75	10	21	583	66.2083	8.17725
	ENSP00000450562	C14orf49 HGNC Symbol|chromosome 14 open reading frame 49 [Source:HGNC Symbol;Acc:19861]|14|ENSG00000176438|ENST00000557275	10		0.563782		0.84197	1;-;-	1;-;-		1.53506	1;-;-	11.34	4	10	20	1.18842e+07	109.204	7.32	7	8	94.36	5.67	5	5	113.78	7.84	6	7	970	111.607	6.22705
	ENSP00000437593	ATL3 HGNC Symbol|atlastin GTPase 3 [Source:HGNC Symbol;Acc:24526]|ENSG00000184743|11|ENST00000538786	7	25.2024	0.695156	30.7503	0.842361	6;5;7	6;5;7	15.7535	1.05381	6;5;7	27.15	10	7	57	3.91534e+07	385.551	16.25	5	20	324.933	21.41	6	18	412.865	21.99	6	19	523	58.7356	5.64307
	ENSP00000373000	BAT1 HGNC (curated)|Spliceosome RNA helicase BAT1 (EC 3.6.1.-)(DEAD box protein UAP56)(56 kDa U2AF65-associated protein)(ATP-dependent RNA helicase p47)(HLA-B-associated transcript-1) [Source:UniProtKB/Swiss-Prot;Acc:Q13838]|HSCHR6_MHC_QBL|ENSG00000215425|ENST00000383508	7	18.7776	1.21475	29.6396	0.843358	6;4;3	6;4;3	24.4708	0.718287	6;4;3	48.13	34	15	283	2.41608e+08	1240.6	48.13	15	94	1130.63	42.99	14	93	1297.18	42.06	14	96	428	48.9599	5.66846
	ENSP00000430403	MAK16 HGNC Symbol|MAK16 homolog (S. cerevisiae) [Source:HGNC Symbol;Acc:13703]|ENSG00000198042|8|ENST00000518389	2	4.72639	1.18665	37.415	0.844329	1;1;-	1;1;-		0.71085	1;1;-	17.52	2	3	7	5.00067e+06	39.21	13.87	2	3	43.03	17.52	3	4					137	16.6516	9.89111
	ENSP00000434883	ARHGAP1 HGNC Symbol|Rho GTPase activating protein 1 [Source:HGNC Symbol;Acc:673]|ENSG00000175220|11|ENST00000528837	5	14.5651	0.629151	5.34402	0.844468	2;1;2	2;1;2	13.1504	1.3405	2;1;2	26.05	4	5	18	1.49899e+07	141.487	12.87	3	6	94.96	8.68	2	4	113.075	26.05	5	8	334	38.3621	6.23975
	ENSP00000216879	NSFL1C HGNC Symbol|NSFL1 (p97) cofactor (p47) [Source:HGNC Symbol;Acc:15912]|ENSG00000088833|20|ENST00000216879	4		0.832641	21.2782	0.844912	-;1;1	-;1;1	29.8292	0.993536	-;1;1	17.3	6	5	19	1.05867e+07	56.45	10	3	3	248.923	12.7	4	7	304.592	13.24	3	9	370	40.5483	5.09717
	ENSP00000198765	CPNE3 HGNC Symbol|copine III [Source:HGNC Symbol;Acc:2316]|ENSG00000085719|8|ENST00000198765	6	6.94443	1.0438	21.3606	0.845291	5;2;3	5;2;3	9.85457	0.912121	5;2;3	19.18	16	7	48	4.29514e+07	254.322	19.18	7	19	173.98	16.01	5	11	263.098	13.41	6	18	537	60.0921	5.84619
	ENSP00000340796	ZNF326 HGNC Symbol|zinc finger protein 326 [Source:HGNC Symbol;Acc:14104]|ENSG00000162664|1|ENST00000340281	9	66.9107	1.15101	52.4516	0.846043	3;1;1	3;1;1	20.1047	0.779859	3;1;1	18.9	5	9	44	1.62603e+07	230.579	18.9	9	16	174.435	15.29	7	12	204.205	15.46	7	16	582	65.6131	5.14795
	ENSP00000387123	ALDH7A1 HGNC Symbol|aldehyde dehydrogenase 7 family, member A1 [Source:HGNC Symbol;Acc:877]|ENSG00000164904|5|ENST00000409134	10	23.7361	1.16604	31.0709	0.849272	8;6;6	8;6;6	11.9063	0.732387	8;6;6	31.73	8	11	84	4.5324e+07	379.302	31.73	11	32	300.243	26.72	9	26	360.773	28.01	10	26	539	58.4501	7.98682
	ENSP00000448433	C12orf10 HGNC Symbol|chromosome 12 open reading frame 10 [Source:HGNC Symbol;Acc:17590]|12|ENSG00000139637|ENST00000549488	5		0.806981		0.849839	-;-;1	-;-;1		1.01521	-;-;1	27.23	4	5	10	2.04017e+07					78.3133	15.96	3	3	118.63	27.23	5	7	213	24.043	5.38916
	ENSP00000399056	SWAP70 HGNC Symbol|SWAP switching B-cell complex 70kDa subunit [Source:HGNC Symbol;Acc:17070]|11|ENSG00000133789|ENST00000447399	6	28.7617	0.958559	25.576	0.852057	5;4;9	5;5;9	9.2546	0.764789	5;4;9	16.7	4	9	62	8.07831e+06	156.818	13.09	7	20	90.6683	10.06	7	19	284.284	13.47	7	23	527	61.9939	6.1001
	ENSP00000391610	SPCS1 HGNC Symbol|signal peptidase complex subunit 1 homolog (S. cerevisiae) [Source:HGNC Symbol;Acc:23401]|3|ENSG00000114902|ENST00000423431	2	79.832	1.40217	17.8941	0.853434	1;1;2	1;1;2	47.0802	0.791443	1;1;2	27.5	2	2	5	1.76752e+07	36.39	26.25	1	1	22.06	26.25	1	1	43.79	27.5	2	3	80	9.26888	9.64209
	ENSP00000438783	PGD HGNC Symbol|phosphogluconate dehydrogenase [Source:HGNC Symbol;Acc:8891]|ENSG00000142657|1|ENST00000543846	5	48.9611	1.17878	49.1621	0.854453	1;1;2	1;1;2	10.5647	0.720745	1;1;2	21.91	4	5	52	3.28152e+07	60.9153	21.91	5	18	59.4667	16.78	4	23	56.2599	15.85	4	11	429	47.4439	6.62451
	ENSP00000359991	PGAM1 HGNC Symbol|phosphoglycerate mutase 1 (brain) [Source:HGNC Symbol;Acc:8888]|ENSG00000171314|10|ENST00000334828	9	25.9992	0.879853	26.4234	0.85511	8;10;15	8;10;15	26.563	0.983439	8;10;15	57.48	4	9	128	1.43503e+08	375.575	51.18	8	27	803.575	57.48	9	42	1249.5	51.18	8	59	254	28.7858	7.18115
	ENSP00000422011	U2SURP HGNC Symbol|U2 snRNP-associated SURP domain containing [Source:HGNC Symbol;Acc:30855]|ENSG00000163714|3|ENST00000493598	8	55.7534	1.19263	60.0171	0.85538	2;2;2	2;2;2	29.0514	0.736759	2;2;2	14.69	8	11	31	3.19131e+07	79.0479	7.49	8	12	77.4484	5.93	5	8	72.3647	10.99	7	11	1028	118.175	8.54346
	ENSP00000254718	MYBBP1A HGNC Symbol|MYB binding protein (P160) 1a [Source:HGNC Symbol;Acc:7546]|ENSG00000132382|17|ENST00000254718	22	52.1175	0.880308	24.2604	0.85568	9;13;8	9;13;8	16.0113	0.990348	9;13;8	24.32	4	23	110	2.37835e+07	321.714	15.59	14	33	298.271	20.86	21	41	345.038	18.07	19	36	1328	148.762	9.27588
	ENSP00000363019	UBE2D1 HGNC Symbol|ubiquitin-conjugating enzyme E2D 1 [Source:HGNC Symbol;Acc:12474]|10|ENSG00000072401|ENST00000373910	1		1.05357	24.2504	0.856213	-;1;1	-;1;1	39.5327	0.811039	-;1;1	6.8	1	1	4	5.78322e+06					33.59	6.8	1	2	39.7315	6.8	1	2	147	16.5913	7.41553
	ENSP00000379680	NAGA HGNC Symbol|N-acetylgalactosaminidase, alpha- [Source:HGNC Symbol;Acc:7631]|ENSG00000198951|22|ENST00000396398	3		0.778425		0.856762	2;-;-	2;-;-		1.13131	2;-;-	12.65	2	3	4	8.78538e+06	82.15	12.65	3	3					28.16	6.81	1	1	411	46.5339	5.18604
	ENSP00000261015	WDR12 HGNC Symbol|WD repeat domain 12 [Source:HGNC Symbol;Acc:14098]|2|ENSG00000138442|ENST00000261015	3		0.887075		0.856959	-;-;1	-;-;1		0.931286	-;-;1	6.38	1	3	19	1.3428e+07	21.57	3.55	2	3	35.0012	3.55	2	6	50.4016	6.38	3	10	423	47.6777	5.89697
	ENSP00000438698	ACO2 HGNC Symbol|aconitase 2, mitochondrial [Source:HGNC Symbol;Acc:118]|ENSG00000100412|22|ENST00000544234	16	10.5868	0.878509	4.0388	0.858786	8;11;9	8;11;9	12.2887	0.9715	8;11;9	37.06	4	16	112	4.21815e+07	599.699	30.49	14	37	595.468	22.47	11	39	586.265	33.51	15	36	761	83.364	7.60596
	ENSP00000229239	GAPDH HGNC Symbol|glyceraldehyde-3-phosphate dehydrogenase [Source:HGNC Symbol;Acc:4141]|ENSG00000111640|12|ENST00000229239	5	25.9824	0.869128	14.1916	0.859394	29;40;42	29;40;42	24.1562	1.04189	29;40;42	31.34	4	5	407	1.4105e+09	1379.76	31.34	5	105	1638.73	29.25	4	135	2074.81	29.25	4	167	335	36.0304	8.45557
	ENSP00000397007	APRT HGNC Symbol|adenine phosphoribosyltransferase [Source:HGNC Symbol;Acc:626]|ENSG00000198931|16|ENST00000426324	6		1.07353	10.4638	0.859651	-;3;2	-;3;2	34.4996	0.767005	-;3;2	71.64	6	6	20	7.56009e+07					201.092	47.01	5	9	166.722	61.94	5	11	134	14.5478	7.34229
	ENSP00000335321	SF3B1 HGNC Symbol|splicing factor 3b, subunit 1, 155kDa [Source:HGNC Symbol;Acc:10768]|ENSG00000115524|2|ENST00000335508	31	55.3439	0.796814	49.1858	0.859814	32;24;26	32;24;26	9.40927	1.09866	32;24;26	36.27	9	32	237	3.81623e+07	965.653	31.98	29	82	802.56	29.06	26	80	827.834	28.99	27	75	1304	145.738	7.09326
	ENSP00000339729	FSCN1 HGNC Symbol|fascin homolog 1, actin-bundling protein (Strongylocentrotus purpuratus) [Source:HGNC Symbol;Acc:11148]|ENSG00000075618|7|ENST00000340250	18	20.8365	0.933249	8.03697	0.861403	20;26;25	20;26;25	16.8007	0.905389	20;26;25	46.82	6	18	416	1.51627e+08	1460.06	38.98	15	125	1449.22	46.82	17	137	1670.62	46.82	18	154	472	52.2299	7.44482
	ENSP00000386998	SP100 HGNC Symbol|SP100 nuclear antigen [Source:HGNC Symbol;Acc:11206]|ENSG00000067066|2|ENST00000409897	5	88.3645	0.756005	75.3016	0.862386	1;2;-	1;2;-		1.24107	1;2;-	15.06	11	5	26	8.97484e+06	152.82	10.56	4	8	141.49	10.56	4	10	152.55	15.06	5	8	445	50.0011	4.84326
	ENSP00000436766	NDUFV1 HGNC Symbol|NADH dehydrogenase (ubiquinone) flavoprotein 1, 51kDa [Source:HGNC Symbol;Acc:7716]|ENSG00000167792|11|ENST00000529927	13	11.1536	0.963016	1.03037	0.865388	7;7;6	7;7;6	4.32224	0.951752	7;7;6	39.78	14	13	51	1.88571e+07	314.136	27.25	11	20	223.083	39.78	12	17	211.189	19.34	8	14	455	49.8363	8.20654
	ENSP00000262428	COTL1 HGNC Symbol|coactosin-like 1 (Dictyostelium) [Source:HGNC Symbol;Acc:18304]|ENSG00000103187|16|ENST00000262428	4		1.4656	23.7515	0.865874	-;2;2	-;2;2	11.3148	0.566609	-;2;2	46.48	2	5	12	2.18631e+07					85.1993	46.48	5	7	66.6016	16.2	3	5	142	15.935	5.66846
	ENSP00000369528	GDI2 HGNC Symbol|GDP dissociation inhibitor 2 [Source:HGNC Symbol;Acc:4227]|ENSG00000057608|10|ENST00000380181	9	29.5962	0.959782	29.4138	0.866562	10;11;9	10;11;9	19.8018	0.870339	10;11;9	45.75	8	11	80	4.65779e+07	457.255	42.5	10	31	385.712	34.5	9	25	439.17	29	7	24	400	45.5902	6.23975
	ENSP00000428796	EIF3E HGNC Symbol|eukaryotic translation initiation factor 3, subunit E [Source:HGNC Symbol;Acc:3277]|8|ENSG00000104408|ENST00000519030	10	29.8171	0.734489		0.86698	4;-;1	4;-;1	10.9487	1.18871	4;-;1	47.44	5	10	40	3.59243e+07	202.272	47.44	10	17	117.172	16.76	5	11	136.097	22.44	5	12	352	41.3307	6.55127
	ENSP00000348128	SVIL HGNC Symbol|supervillin [Source:HGNC Symbol;Acc:11480]|10|ENSG00000197321|ENST00000355867	7	48.6847	0.726772	40.8233	0.867598	2;3;1	2;3;1	7.29349	1.27344	2;3;1	6.14	5	12	30	1.79088e+07	93.3638	3.39	6	6	87.39	4.7	9	12	147.812	3.75	8	12	2214	247.593	6.97607
	ENSP00000425976	COPS4 HGNC Symbol|COP9 constitutive photomorphogenic homolog subunit 4 (Arabidopsis) [Source:HGNC Symbol;Acc:16702]|ENSG00000138663|4|ENST00000509093	4		1.00662		0.867783	-;1;-	-;1;-		0.834619	-;1;-	12.5	5	4	6	1.09378e+07	42.34	3.41	1	1	77.6344	9.09	3	3	91.2244	6.25	2	2	352	40.1717	6.94678
	ENSP00000431297	CSDE1 HGNC Symbol|cold shock domain containing E1, RNA-binding [Source:HGNC Symbol;Acc:29905]|ENSG00000009307|1|ENST00000530886	6	23.6696	0.999207	28.5944	0.86844	1;2;4	1;2;4	3.67976	0.849128	1;2;4	14.67	5	7	39	1.20684e+07	114.43	10.03	6	8	201.662	10.03	6	13	236.522	14.67	7	18	668	74.5368	6.0874
	ENSP00000241052	CAT HGNC Symbol|catalase [Source:HGNC Symbol;Acc:1516]|ENSG00000121691|11|ENST00000241052	14	8.19019	1.07213	9.34289	0.868794	3;2;2	3;2;2	13.6755	0.812973	3;2;2	34.54	1	14	87	5.44907e+07	586.401	28.27	13	31	444.904	34.35	13	27	628.503	32.83	13	29	527	59.7188	7.38623
	ENSP00000386743	MDH1 HGNC Symbol|malate dehydrogenase 1, NAD (soluble) [Source:HGNC Symbol;Acc:6970]|ENSG00000014641|2|ENST00000409908	2		1.11607	11.2279	0.868816	-;1;1	-;1;1	23.6383	0.763547	-;1;1	14.79	5	2	6	1.39304e+07					58.47	14.79	2	3	43.7549	14.79	2	3	169	18.6775	5.93506
	ENSP00000425634	HARS HGNC Symbol|histidyl-tRNA synthetase [Source:HGNC Symbol;Acc:4816]|ENSG00000170445|5|ENST00000504156	7	34.8584	1.03889	34.3534	0.869811	3;4;5	3;4;5	21.3513	0.874808	3;4;5	18.66	10	9	24	2.03108e+07	69.61	7.27	4	7	60.88	10.61	6	7	112.708	15.32	7	10	509	57.3742	5.88428
	ENSP00000335203	ATPIF1 HGNC Symbol|ATPase inhibitory factor 1 [Source:HGNC Symbol;Acc:871]|ENSG00000130770|1|ENST00000335514	2		0.611091	4.68968	0.870187	-;1;1	-;1;1	12.1942	1.3896	-;1;1	41.51	5	5	13	5.56327e+08					56.4001	35.85	4	6	58.5901	32.08	4	7	106	12.2413	9.34912
	ENSP00000258737	RAC1 HGNC (curated)|Ras-related C3 botulinum toxin substrate 1 Precursor (p21-Rac1)(Ras-like protein TC25)(Cell migration-inducing gene 5 protein) [Source:UniProtKB/Swiss-Prot;Acc:P63000]|7|ENSG00000136238|ENST00000348035	3		0.919416	25.9635	0.871032	-;2;2	-;2;2	3.92344	0.911586	-;2;2	30.21	3	4	32	3.71927e+07	110.41	9.9	2	7	259.59	30.21	4	14	182.045	30.21	4	11	192	21.4362	8.49951
	ENSP00000360373	CUL4B HGNC Symbol|cullin 4B [Source:HGNC Symbol;Acc:2555]|X|ENSG00000158290|ENST00000371322	9	33.0017	1.06143	11.8599	0.871678	4;1;2	4;1;2	28.2665	0.848842	4;1;2	21.9	5	14	55	1.64506e+07	291.975	18.66	13	22	174.718	13.18	11	15	220.14	12.85	10	18	895	102.235	7.94287
	ENSP00000318697	TUBB6 HGNC (curated)|Tubulin beta-6 chain [Source:UniProtKB/Swiss-Prot;Acc:Q9BUF5]|18|ENSG00000176014|ENST00000317702	11	29.6658	1.0566	22.0451	0.871933	14;15;12	14;15;12	16.843	0.835135	14;15;12	72.2	4	15	367	1.22363e+09	2001.57	53.14	13	104	2143.35	63	14	124	2426.06	62.33	14	139	446	49.825	4.88135
	ENSP00000427985	DPYSL2 HGNC Symbol|dihydropyrimidinase-like 2 [Source:HGNC Symbol;Acc:3014]|ENSG00000092964|8|ENST00000521913	10	18.2611	0.67062	4.31344	0.871974	17;13;21	17;13;21	16.4852	1.21361	17;13;21	39.93	7	12	254	1.73939e+08	763.519	33.21	11	78	845.705	33.21	11	80	1454.76	39.93	12	96	536	58.1264	6.15088
	ENSP00000314458	CDC42 HGNC (curated)|Cell division control protein 42 homolog Precursor (G25K GTP-binding protein) [Source:UniProtKB/Swiss-Prot;Acc:P60953]|1|ENSG00000070831|ENST00000315554	1		0.951272	21.2369	0.87309	-;1;1	-;1;1	14.4486	0.910266	-;1;1	14.14	3	1	5	8.45961e+07					23.94	14.14	1	2	25.23	14.14	1	3	191	21.2969	6.03662
	ENSP00000317189	CTTN HGNC Symbol|cortactin [Source:HGNC Symbol;Acc:3338]|ENSG00000085733|11|ENST00000346329	9		0.954168	3.2928	0.873569	-;2;8	-;2;8	7.01945	0.880397	-;2;8	23.39	7	9	24	2.03005e+07					248.399	11.89	5	9	297.348	23.39	9	15	513	57.4315	5.32568
	ENSP00000444099	CTNNA1 HGNC Symbol|catenin (cadherin-associated protein), alpha 1, 102kDa [Source:HGNC Symbol;Acc:2509]|ENSG00000044115|5|ENST00000541863	23	22.8672	0.795011	24.1983	0.874611	24;19;22	24;19;22	5.57961	1.05441	24;19;22	44.56	21	23	224	5.64416e+07	995.607	42.09	22	75	938.033	40.74	21	66	1491.86	35.24	20	83	891	98.3226	6.37939
	ENSP00000264036	MCAM HGNC Symbol|melanoma cell adhesion molecule [Source:HGNC Symbol;Acc:6934]|ENSG00000076706|11|ENST00000264036	21	20.9034	0.710672	20.2133	0.875934	23;22;20	23;22;20	8.72248	1.21573	23;22;20	45.2	5	21	256	9.81783e+07	1151.38	41.33	19	76	1026.7	39.16	18	79	1498.43	41.18	19	101	646	71.5626	5.75732
	ENSP00000234590	ENO1 HGNC Symbol|enolase 1, (alpha) [Source:HGNC Symbol;Acc:3350]|ENSG00000074800|1|ENST00000234590	9	23.8475	0.863188	18.4634	0.876221	39;47;42	40;48;44	21.7017	1.02202	39;48;43	30.18	1	11	459	6.69986e+08	3126.17	28.8	10	139	3324.73	28.8	10	157	3777.43	30.18	11	163	434	47.1393	7.38623
	ENSP00000216832	PNN HGNC (curated)|Pinin (140 kDa nuclear and cell adhesion-related phosphoprotein)(Domain-rich serine protein)(DRS protein)(DRSP)(Melanoma metastasis clone A protein)(Desmosome-associated protein)(SR-like protein)(Nuclear protein SDK3) [Source:UniProtKB/Swiss-Prot;Acc:Q9H307]|14|ENSG00000100941|ENST00000216832	3	71.0768	0.907194	54.1308	0.876467	2;1;1	2;1;1	12.4282	1.02173	2;1;1	4.74	1	4	8	1.28643e+08	31.5	3.91	3	3	14.19	2.93	3	4	22.99	0.98	1	1	717	81.579	7.13721
	ENSP00000329528	XRCC5 HGNC (curated)|ATP-dependent DNA helicase 2 subunit 2 (EC 3.6.1.-)(ATP-dependent DNA helicase II 80 kDa subunit)(Lupus Ku autoantigen protein p86)(86 kDa subunit of Ku antigen)(Ku86)(Ku80)(Thyroid-lupus autoantigen)(TLAA)(CTC box-binding factor 85 kDa subunit)(CTCBF)(CTC85)(Nuclear factor IV)(DNA repair protein XRCC5) [Source:UniProtKB/Swiss-Prot;Acc:P13010]|2|ENSG00000079246|ENST00000328063	10	10.1799	0.93504	3.66678	0.876854	14;13;15	14;13;15	6.2946	0.88473	14;13;15	16.12	2	10	126	1.36345e+08	529.583	11.2	8	41	373.749	11.2	8	39	513.456	16.12	10	46	732	82.6523	5.80811
	ENSP00000453841	ANXA2 HGNC Symbol|annexin A2 [Source:HGNC Symbol;Acc:537]|15|ENSG00000182718|ENST00000560466	1		0.943263		0.877336	-;-;1	-;-;1		0.896637	-;-;1	92.09	6	13	977	2.84074e+09	5317.03	79.14	9	274	6413.78	79.14	12	349	6483.93	92.09	13	354	139	16.0821	5.17334
	ENSP00000014112	PTBP1 HGNC Symbol|polypyrimidine tract binding protein 1 [Source:HGNC Symbol;Acc:9583]|ENSG00000011304|19|ENST00000349038	11	11.0311	0.9383	10.067	0.877742	33;31;30	33;31;30	0.407858	0.924015	33;31;30	45.01	20	11	356	2.9737e+08	2318.46	45.01	11	117	2211.24	45.01	11	124	2307.07	45.01	11	115	531	57.1856	9.17334
	ENSP00000384082	XRCC6 HGNC (curated)|ATP-dependent DNA helicase 2 subunit 1 (EC 3.6.1.-)(ATP-dependent DNA helicase II 70 kDa subunit)(Lupus Ku autoantigen protein p70)(Ku70)(70 kDa subunit of Ku antigen)(Thyroid-lupus autoantigen)(TLAA)(CTC box-binding factor 75 kDa subunit)(CTCBF)(CTC75)(DNA repair protein XRCC6) [Source:UniProtKB/Swiss-Prot;Acc:P12956]|22|ENSG00000196419|ENST00000405506	13	10.7519	0.942889	4.73355	0.877777	55;53;56	54;53;56	6.73214	0.927524	55;54;56	37.75	5	14	412	1.46409e+08	1808.15	36.85	13	131	1574.8	37.75	14	138	1798.85	37.75	14	143	559	64.243	9.27588
	ENSP00000345689	RAB5C HGNC Symbol|RAB5C, member RAS oncogene family [Source:HGNC Symbol;Acc:9785]|ENSG00000108774|17|ENST00000346213	3	12.9287	0.90846	6.71165	0.87885	4;2;3	4;2;3	1.60567	0.946915	4;2;3	33.33	8	5	104	8.32218e+07	565.99	33.33	5	33	581.805	33.33	5	32	710.8	33.33	5	39	216	23.4678	8.41162
	ENSP00000265073	SUB1 HGNC Symbol|SUB1 homolog (S. cerevisiae) [Source:HGNC Symbol;Acc:19985]|ENSG00000113387|5|ENST00000265073	5		1.01909	7.01165	0.87948	-;4;5	-;4;5	6.28889	0.857218	-;4;5	66.14	4	6	22	4.49435e+07					312.75	44.09	3	10	284.429	66.14	6	12	127	14.3864	9.59814
	ENSP00000364949	DDAH2 HGNC Symbol|dimethylarginine dimethylaminohydrolase 2 [Source:HGNC Symbol;Acc:2716]|ENSG00000213722|6|ENST00000375792	8		0.799757	2.74654	0.87975	-;3;3	-;3;3	14.3605	1.02914	-;3;3	48.42	5	9	19	4.49713e+07					116.63	15.44	4	6	221.94	48.42	9	13	285	29.6255	6.01123
	ENSP00000240185	TARDBP HGNC Symbol|TAR DNA binding protein [Source:HGNC Symbol;Acc:11571]|ENSG00000120948|1|ENST00000240185	7	20.0063	1.00519	18.0814	0.879893	3;3;4	3;3;4	11.9978	0.902172	3;3;4	29.23	4	9	92	5.37043e+07	463.391	29.23	9	26	622.436	27.78	8	33	628.68	24.15	7	33	414	44.7113	6.18896
	ENSP00000360532	CDC5L HGNC Symbol|CDC5 cell division cycle 5-like (S. pombe) [Source:HGNC Symbol;Acc:1743]|ENSG00000096401|6|ENST00000371477	6	93.9014	1.24883	77.6809	0.880585	1;1;-	1;1;-		0.795255	1;1;-	8.6	1	7	12	7.23894e+06	39.54	5.99	4	4	104.87	8.6	7	8					802	92.1937	8.17725
	ENSP00000301935	NFIC HGNC Symbol|nuclear factor I/C (CCAAT-binding transcription factor) [Source:HGNC Symbol;Acc:7786]|ENSG00000141905|19|ENST00000346156	4		0.527168		0.880724	-;-;2	-;-;2		1.61055	-;-;2	15.52	26	5	23	1.55556e+07	51.7496	10.84	3	8	35.823	9.36	2	5	76.895	15.52	5	10	406	45.3842	8.82178
	ENSP00000284320	TOMM70A HGNC Symbol|translocase of outer mitochondrial membrane 70 homolog A (S. cerevisiae) [Source:HGNC Symbol;Acc:11985]|ENSG00000154174|3|ENST00000284320	4	36.4384	0.948896	16.2221	0.880899	4;2;2	4;2;2	16.5725	0.941557	4;2;2	14.14	2	4	26	1.78431e+07	197.905	14.14	4	9	122.87	14.14	4	9	128.353	14.14	4	8	608	67.412	7.12256
	ENSP00000377486	MRPL19 HGNC Symbol|mitochondrial ribosomal protein L19 [Source:HGNC Symbol;Acc:14052]|ENSG00000115364|2|ENST00000393909	4		0.891984	0.101646	0.881496	-;1;1	-;1;1	3.07517	0.955234	-;1;1	11.3	1	4	9	1.84222e+07	40.37	3.08	1	1	112.232	11.3	4	4	119.972	11.3	4	4	292	33.5136	9.49561
	ENSP00000356413	TROVE2 HGNC Symbol|TROVE domain family, member 2 [Source:HGNC Symbol;Acc:11313]|ENSG00000116747|1|ENST00000367443	4		0.877677	2.82997	0.882081	-;1;1	-;1;1	5.05761	0.972751	-;1;1	17.37	5	4	19	2.421e+07	95.67	8.88	2	7	70.1167	8.3	2	4	146.889	11.39	3	8	518	58.4452	8.36768
	ENSP00000418543	PDXK HGNC Symbol|pyridoxal (pyridoxine, vitamin B6) kinase [Source:HGNC Symbol;Acc:8819]|ENSG00000160209|21|ENST00000463355	3		1.50471		0.882523	-;1;-	-;1;-		0.567826	-;1;-	11.58	5	3	5	4.51674e+06					30.65	11.58	3	3	43.73	7.72	2	2	259	29.2269	6.02393
	ENSP00000311186	ATP2A2 HGNC (automatic)|Sarcoplasmic/endoplasmic reticulum calcium ATPase 2 (SERCA2)(EC 3.6.3.8)(Calcium pump 2)(Calcium-transporting ATPase sarcoplasmic reticulum type, slow twitch skeletal muscle isoform)(SR Ca(2+)-ATPase 2)(Endoplasmic reticulum class 1/2 Ca(2+) ATPase) [Source:UniProtKB/Swiss-Prot;Acc:P16615]|12|ENSG00000174437|ENST00000308664	10	14.5916	0.849639	21.8502	0.882578	3;6;5	3;6;5	12.558	1.0336	3;6;5	13.74	5	10	36	3.06123e+07	166.724	8.73	6	11	185.637	10.93	8	14	135.44	10.03	7	11	997	109.62	5.36377
	ENSP00000354468	CYB5R3 HGNC (curated)|NADH-cytochrome b5 reductase 3 (Cytochrome b5 reductase)(B5R)(EC 1.6.2.2)(Diaphorase-1) [Contains NADH-cytochrome b5 reductase 3 membrane-bound form;NADH-cytochrome b5 reductase 3 soluble form] [Source:UniProtKB/Swiss-Prot;Acc:P00387]|22|ENSG00000100243|ENST00000361740	12	39.9835	0.754088	41.9618	0.882721	16;12;13	16;12;13	12.1227	1.15536	16;12;13	72.3	5	12	225	2.89661e+08	731.627	72.3	12	69	956.564	72.3	11	78	1131.35	72.3	11	78	278	31.6084	7.57666
	ENSP00000262554	SPTLC1 HGNC Symbol|serine palmitoyltransferase, long chain base subunit 1 [Source:HGNC Symbol;Acc:11277]|9|ENSG00000090054|ENST00000262554	7	15.0466	0.855129	0.656286	0.882836	3;3;-	3;3;-		1.02462	3;3;-	19.45	1	7	45	1.99436e+07	345.88	16.49	6	16	260.497	16.49	6	15	333.09	13.11	5	14	473	52.7105	6.01123
	ENSP00000343002	B3GALTL HGNC Symbol|beta 1,3-galactosyltransferase-like [Source:HGNC Symbol;Acc:20207]|13|ENSG00000187676|ENST00000343307	1		0.764252		0.883485	-;1;-	-;1;-		1.11919	-;1;-	5.82	1	2	2	944391					23.17	5.82	2	2					498	56.528	7.50342
	ENSP00000408399	GSPT1 HGNC Symbol|G1 to S phase transition 1 [Source:HGNC Symbol;Acc:4621]|16|ENSG00000103342|ENST00000439887	2	27.3886	1.08473	43.2776	0.883565	3;4;4	3;4;4	37.6352	0.795507	3;4;4	4.72	6	3	15	6.486e+06	55.99	4.72	3	5	63.13	4.72	3	5	92.77	3.3	2	5	636	68.5571	5.32568
	ENSP00000349748	SFPQ HGNC Symbol|splicing factor proline/glutamine-rich [Source:HGNC Symbol;Acc:10774]|ENSG00000116560|1|ENST00000357214	26	52.3202	0.935633	44.6653	0.886293	38;69;57	38;69;57	8.91564	0.945669	38;69;57	46.96	3	28	613	2.81966e+08	2025.69	42.43	24	138	3396.81	46.96	28	255	3265.94	46.68	27	220	707	76.1016	9.43701
	ENSP00000216484	SPTLC2 HGNC Symbol|serine palmitoyltransferase, long chain base subunit 2 [Source:HGNC Symbol;Acc:11278]|ENSG00000100596|14|ENST00000216484	9	31.4487	0.819615	28.2128	0.886496	1;1;3	1;1;3	13.4113	1.03872	1;1;3	18.68	7	9	25	2.31086e+07	72.9413	16.73	7	7	98.3513	12.63	7	8	119.048	18.68	9	10	562	62.8839	7.78174
	ENSP00000368129	API5 HGNC Symbol|apoptosis inhibitor 5 [Source:HGNC Symbol;Acc:594]|ENSG00000166181|11|ENST00000378852	7	29.4149	0.956461	20.3457	0.88712	7;7;8	7;7;8	9.48741	0.91006	7;7;8	30.16	7	9	63	6.07444e+07	200.256	30.16	9	26	76.015	28.77	8	18	232.317	28.77	8	19	504	56.7348	5.92236
	ENSP00000315205	ILF3 HGNC Symbol|interleukin enhancer binding factor 3, 90kDa [Source:HGNC Symbol;Acc:6038]|ENSG00000129351|19|ENST00000318511	14	20.6041	0.942804	11.3646	0.887456	24;23;19	24;23;19	1.90562	0.858881	24;23;19	23.27	8	16	219	1.39481e+08	1014.66	23.15	15	79	799.491	22.04	14	64	1096.63	21.92	15	76	894	95.2791	8.76318
	ENSP00000442665	HADHB HGNC Symbol|hydroxyacyl-CoA dehydrogenase/3-ketoacyl-CoA thiolase/enoyl-CoA hydratase (trifunctional protein), beta subunit [Source:HGNC Symbol;Acc:4803]|ENSG00000138029|2|ENST00000545822	12	11.5439	0.990389	2.17174	0.887934	13;10;10	13;10;10	10.5462	0.887221	13;10;10	44.03	7	12	206	1.5514e+08	1034.96	44.03	12	71	902.238	38.05	11	72	1042.44	31.86	10	63	452	48.8482	9.17334
	ENSP00000347890	DNM2 HGNC Symbol|dynamin 2 [Source:HGNC Symbol;Acc:2974]|ENSG00000079805|19|ENST00000355667	6	25.6192	0.811008		0.888413	1;-;2	1;-;2	22.9088	1.12354	1;-;2	7.51	22	8	50	1.96289e+07	192.777	4.97	5	15	120.67	4.97	5	15	138.427	6.7	7	20	866	97.5909	7.63525
	ENSP00000221431	FBXO17 HGNC Symbol|F-box protein 17 [Source:HGNC Symbol;Acc:18754]|ENSG00000104835|19|ENST00000221431	6	10.2492	0.949424	39.5753	0.888562	1;1;-	1;1;-		0.914096	1;1;-	11.78	4	6	15	4.51239e+06	127.151	11.78	6	6	86.9951	11.78	6	6	83.2041	7.34	3	3	518	58.2459	8.1333
	ENSP00000264896	SCARB2 HGNC (curated)|Lysosome membrane protein 2 (Lysosome membrane protein II)(LIMP II)(Scavenger receptor class B member 2)(85 kDa lysosomal membrane sialoglycoprotein)(LGP85)(CD36 antigen-like 2)(CD36 antigen) [Source:UniProtKB/Swiss-Prot;Acc:Q14108]|4|ENSG00000138760|ENST00000264896	4	31.3867	0.902411	38.9096	0.889119	6;4;7	6;4;7	13.0086	0.922468	6;4;7	15.9	3	4	61	6.32833e+07	331.728	15.9	4	25	300.556	15.9	4	14	295.217	15.9	4	22	478	54.2555	5.13525
	ENSP00000310129	PSMD2 HGNC Symbol|proteasome (prosome, macropain) 26S subunit, non-ATPase, 2 [Source:HGNC Symbol;Acc:9559]|ENSG00000175166|3|ENST00000310118	20	9.12563	1.01088	15.5302	0.889473	6;6;9	6;6;9	7.33532	0.949965	6;6;9	33.37	9	21	135	5.96378e+07	665.356	26.98	17	42	630.036	29.41	17	44	763.313	30.07	18	49	908	100.136	5.19873
	ENSP00000245206	GOT2 HGNC Symbol|glutamic-oxaloacetic transaminase 2, mitochondrial (aspartate aminotransferase 2) [Source:HGNC Symbol;Acc:4433]|ENSG00000125166|16|ENST00000245206	13	18.1285	1.24654	18.0416	0.889803	21;19;22	21;19;22	18.2208	0.743358	21;19;22	46.28	3	13	181	1.85889e+08	1079.58	44.42	11	57	1217.08	38.84	11	60	1240.75	38.84	11	64	430	47.4873	9.01221
	ENSP00000311032	CASP3 HGNC Symbol|caspase 3, apoptosis-related cysteine peptidase [Source:HGNC Symbol;Acc:1504]|ENSG00000164305|4|ENST00000308394	3		1.10757	0.461686	0.890146	-;2;1	-;2;1	41.5633	0.849549	-;2;1	11.55	4	3	3	9.71981e+06					35.63	6.14	2	2	27.45	5.42	1	1	277	31.5875	6.53662
	ENSP00000225972	LRRC59 HGNC (automatic)|Leucine-rich repeat-containing protein 59 [Source:UniProtKB/Swiss-Prot;Acc:Q96AG4]|17|ENSG00000108829|ENST00000225972	9	15.6973	1.12033	1.33196	0.890794	5;8;8	5;8;8	17.9425	0.81651	5;8;8	37.79	1	11	102	6.25709e+07	248.827	27.36	9	26	289.024	23.45	8	35	315.615	33.88	10	41	307	34.9089	9.56885
	ENSP00000244204	NAGK HGNC Symbol|N-acetylglucosamine kinase [Source:HGNC Symbol;Acc:17174]|ENSG00000124357|2|ENST00000244204	7		0.820975	30.1106	0.890948	-;1;1	-;1;1	7.6205	1.06414	-;1;1	20.64	8	7	15	1.47127e+07					113.06	17.44	6	6	187.426	20.64	7	9	344	37.3519	6.23975
	ENSP00000445339	PLS3 HGNC Symbol|plastin 3 [Source:HGNC Symbol;Acc:9091]|ENSG00000102024|X|ENST00000539310	9	23.4065	0.848285	8.07794	0.891826	13;7;15	13;7;15	23.908	1.12715	13;7;15	23.93	6	9	72	5.91619e+07	338.647	18.46	7	22	386.857	14.02	6	19	548.671	19.49	8	31	585	65.5908	6.30322
	ENSP00000448839	ALDH2 HGNC Symbol|aldehyde dehydrogenase 2 family (mitochondrial) [Source:HGNC Symbol;Acc:404]|12|ENSG00000111275|ENST00000553044	6	14.6986	0.835717	3.41747	0.892456	6;5;5	6;5;5	9.24878	1.00698	6;5;5	23.13	5	6	63	5.89137e+07	281.701	23.13	6	25	173.796	20.86	5	18	228.87	20.86	5	20	441	48.5014	6.99072
	ENSP00000216639	VRK1 HGNC Symbol|vaccinia related kinase 1 [Source:HGNC Symbol;Acc:12718]|ENSG00000100749|14|ENST00000216639	4	8.30693	1.0962	11.9934	0.893228	2;2;3	2;2;3	16.3193	0.796621	2;2;3	10.61	1	4	9	5.38339e+06	25.97	5.05	2	2	25.6859	6.57	3	3	33.1159	10.61	4	4	396	45.4474	8.90967
	ENSP00000445393	SEC23A HGNC Symbol|Sec23 homolog A (S. cerevisiae) [Source:HGNC Symbol;Acc:10701]|ENSG00000100934|14|ENST00000545328	13	49.0984	0.979181	66.8356	0.894154	2;2;-	2;2;-		0.862337	2;2;-	27.99	14	15	98	5.48473e+07	392.078	19.7	11	29	441.663	17.26	11	32	543.38	18.34	11	37	736	82.9156	7.45947
	ENSP00000260665	LRPPRC HGNC Symbol|leucine-rich PPR-motif containing [Source:HGNC Symbol;Acc:15714]|ENSG00000138095|2|ENST00000260665	20	18.2115	0.845791	14.3213	0.89528	19;20;12	19;20;12	9.68717	1.02787	19;20;12	18.58	8	21	200	7.41246e+07	870.167	18.58	20	70	832.793	18.22	20	74	787.381	16.57	16	56	1394	157.805	6.12549
	ENSP00000259873	MRPS18B HGNC Symbol|mitochondrial ribosomal protein S18B [Source:HGNC Symbol;Acc:14516]|ENSG00000204568|6|ENST00000259873	2		1.32405	5.32098	0.897965	-;1;1	-;1;1	2.13528	0.655002	-;1;1	10.47	2	2	5	1.20512e+07					24.97	10.47	2	2	31.59	10.47	2	3	258	29.377	9.37842
	ENSP00000356218	CYB5R1 HGNC Symbol|cytochrome b5 reductase 1 [Source:HGNC Symbol;Acc:13397]|ENSG00000159348|1|ENST00000367249	2		1.03959		0.899305	-;1;-	-;1;-		0.837505	-;1;-	9.51	1	2	2	9.92669e+06					21.82	9.51	2	2					305	34.0732	9.37842
	ENSP00000270538	TIMM44 HGNC Symbol|translocase of inner mitochondrial membrane 44 homolog (yeast) [Source:HGNC Symbol;Acc:17316]|ENSG00000104980|19|ENST00000270538	8	5.69101	1.01389	0.466493	0.89969	4;1;-	4;1;-		0.891945	4;1;-	26.33	1	8	23	1.65041e+07	151.981	26.33	8	12	112.673	17.04	4	6	83.65	5.31	2	5	452	51.3235	8.32373
	ENSP00000225665	SLC25A11 HGNC (curated)|Mitochondrial 2-oxoglutarate/malate carrier protein (OGCP)(Solute carrier family 25 member 11) [Source:UniProtKB/Swiss-Prot;Acc:Q02978]|17|ENSG00000108528|ENST00000225665	4	18.2884	0.914	18.5973	0.901748	1;3;2	1;3;2	1.58221	0.994047	1;3;2	21.02	1	5	10	8.25507e+06	28.47	3.5	1	1	53.1333	18.79	4	6	31.53	5.73	2	3	314	34.0399	9.90576
	ENSP00000449018	ERP29 HGNC Symbol|endoplasmic reticulum protein 29 [Source:HGNC Symbol;Acc:13799]|12|ENSG00000089248|ENST00000546477	2		1.21272	1.80258	0.902645	-;2;2	-;2;2	11.1394	0.72273	-;2;2	30	2	2	7	2.82428e+07					68.51	30	2	4	63.9133	30	2	3	160	18.1044	8.00146
	ENSP00000438845	GSR HGNC Symbol|glutathione reductase [Source:HGNC Symbol;Acc:4623]|8|ENSG00000104687|ENST00000537535	2		0.731964		0.902708	-;1;-	-;1;-		1.19398	-;1;-	4.32	7	3	7	1.56112e+06	0	2.95	2	2	0	3.18	2	3	0	1.82	1	2	440	47.2372	8.74854
	ENSP00000295006	CAPN2 HGNC (curated)|Calpain-2 catalytic subunit Precursor (EC 3.4.22.53)(Calpain-2 large subunit)(Calcium-activated neutral proteinase 2)(CANP 2)(Calpain M-type)(M-calpain)(Millimolar-calpain)(Calpain large polypeptide L2) [Source:UniProtKB/Swiss-Prot;Acc:P17655]|1|ENSG00000162909|ENST00000295006	19	24.0224	0.684449	20.6988	0.905613	15;9;16	15;9;16	13.9703	1.18166	16;9;16	49.43	3	21	295	7.13434e+07	1542.35	44.43	20	97	1204.86	43.86	19	83	2154.84	43.86	19	115	700	79.9448	4.98291
	ENSP00000358140	EIF3A HGNC Symbol|eukaryotic translation initiation factor 3, subunit A [Source:HGNC Symbol;Acc:3271]|ENSG00000107581|10|ENST00000369144	46	5.11129	0.789788	15.8022	0.906084	16;24;21	16;24;21	5.7524	1.08258	16;24;21	39.58	2	51	317	6.45841e+07	731.705	26.77	32	75	967.616	34.66	42	117	1099.99	35.67	44	125	1382	166.468	6.78564
	ENSP00000261942	FAF2 HGNC (automatic)|FAS-associated factor 2 (UBX domain-containing protein 3B)(UBX domain-containing protein 8)(Protein ETEA) [Source:UniProtKB/Swiss-Prot;Acc:Q96CS3]|5|ENSG00000113194|ENST00000261942	13	39.663	0.884836	13.591	0.907199	5;3;3	5;3;3	24.6753	0.777886	5;3;3	46.07	3	13	53	2.21352e+07	329.941	32.58	9	21	235.215	39.78	11	14	269.033	44.72	12	18	445	52.5905	5.61768
	ENSP00000264710	RAB10 HGNC (curated)|Ras-related protein Rab-10 [Source:UniProtKB/Swiss-Prot;Acc:P61026]|2|ENSG00000084733|ENST00000264710	3	13.9514	0.68332	21.4073	0.90732	2;2;2	2;2;2	11.0942	1.30407	2;2;2	18.5	1	3	14	2.23064e+07	87.7499	18.5	3	5	112.009	18.5	3	5	84.3344	18.5	3	4	200	22.5266	8.38232
	ENSP00000319361	AP1B1 HGNC (curated)|AP-1 complex subunit beta-1 (Adapter-related protein complex 1 subunit beta-1)(Adaptor protein complex AP-1 subunit beta-1)(Beta-adaptin 1)(Beta1-adaptin)(Golgi adaptor HA1/AP1 adaptin beta subunit)(Clathrin assembly protein complex 1 beta large chain) [Source:UniProtKB/Swiss-Prot;Acc:Q10567]|22|ENSG00000100280|ENST00000317368	1		0.807197		0.908377	-;-;1	-;-;1		1.08485	-;-;1	10.01	6	7	75	2.45351e+07	433.659	6.09	5	26	354.217	6.09	5	23	383.123	10.01	7	26	919	101.283	5.10986
	ENSP00000340466	GANAB HGNC Symbol|glucosidase, alpha; neutral AB [Source:HGNC Symbol;Acc:4138]|ENSG00000089597|11|ENST00000346178	1	29.19	1.07298	25.9499	0.908452	2;1;-	2;1;-		0.848548	2;1;-	51.76	10	42	767	3.20216e+08	4056.22	47.2	40	245	3623.59	51.24	41	254	4756.87	45.76	40	268	966	109.369	6.23975
	ENSP00000307318	P4HA1 HGNC Symbol|prolyl 4-hydroxylase, alpha polypeptide I [Source:HGNC Symbol;Acc:8546]|ENSG00000122884|10|ENST00000307116	3	63.0532	1.11052	54.3245	0.908847	1;1;1	1;1;1	4.80494	0.832902	1;1;1	42.51	1	16	201	5.60811e+07	1284.05	42.51	16	83	1076.18	41.01	15	60	1021.96	39.89	13	58	534	61.011	6.01123
	ENSP00000359910	PSMA7 HGNC Symbol|proteasome (prosome, macropain) subunit, alpha type, 7 [Source:HGNC Symbol;Acc:9536]|ENSG00000101182|20|ENST00000370873	6	16.635	1.26448	19.9896	0.909605	3;4;6	3;4;6	10.355	0.729919	3;4;6	43.55	9	7	40	5.81469e+07	68.23	26.61	5	9	207.9	35.08	6	13	255.774	43.55	7	18	248	27.8696	8.45557
	ENSP00000439114	PECAM1 HGNC Symbol|platelet/endothelial cell adhesion molecule [Source:HGNC Symbol;Acc:8823]|ENSG00000256277|HG183_PATCH|ENST00000545548	5	40.2402	0.554118	43.6982	0.909655	6;6;6	6;6;6	10.776	1.66296	6;6;6	7.45	4	5	85	5.8101e+07	386.375	7.45	5	29	299.97	6.1	4	28	369.336	7.45	5	28	738	82.4698	6.99072
	ENSP00000264167	AGPS HGNC Symbol|alkylglycerone phosphate synthase [Source:HGNC Symbol;Acc:327]|ENSG00000018510|2|ENST00000264167	6	22.9569	1.15998	37.7222	0.910521	2;1;1	2;1;1	57.0453	0.839975	2;1;1	10.79	3	8	27	2.90561e+07	96.8	9.88	7	9	117.73	7.14	5	6	104.51	10.03	7	12	658	72.8658	7.34229
	ENSP00000225792	DDX5 HGNC Symbol|DEAD (Asp-Glu-Ala-Asp) box polypeptide 5 [Source:HGNC Symbol;Acc:2746]|ENSG00000108654|17|ENST00000225792	22	38.1906	1.05184	31.9482	0.91231	36;38;36	36;38;36	8.6142	0.883205	36;38;36	55.39	3	29	477	2.53784e+08	2161.12	46.93	25	158	2226.6	45.77	23	165	2367.13	55.22	26	154	603	67.705	8.99756
	ENSP00000203407	UQCRC1 HGNC (curated)|Cytochrome b-c1 complex subunit 1, mitochondrial Precursor (Ubiquinol-cytochrome-c reductase complex core protein 1)(Core protein I)(Complex III subunit 1) [Source:UniProtKB/Swiss-Prot;Acc:P31930]|3|ENSG00000010256|ENST00000203407	13	19.5488	0.997332	9.56943	0.912329	8;8;7	8;8;7	14.999	0.846456	8;8;7	38.96	1	15	110	7.49732e+07	752.577	38.96	15	41	602.683	29.79	11	34	730.531	31.25	11	35	480	52.6124	6.3667
	ENSP00000406327	FAM36A HGNC Symbol|family with sequence similarity 36, member A [Source:HGNC Symbol;Acc:26970]|ENSG00000203667|1|ENST00000411948	3		0.679566	3.04747	0.912787	-;2;3	-;2;3	8.9531	1.24618	-;2;3	38.98	2	3	7	1.21501e+07					29.85	23.73	2	3	40.86	38.98	3	4	118	13.2828	8.76318
	ENSP00000374574	DDX42 HGNC Symbol|DEAD (Asp-Glu-Ala-Asp) box polypeptide 42 [Source:HGNC Symbol;Acc:18676]|ENSG00000198231|17|ENST00000389924	13	51.3022	0.976694	36.6251	0.91323	3;2;1	3;2;1	22.1533	0.96713	3;2;1	20.04	2	13	41	1.75309e+07	90.8611	11.94	9	16	74.9771	13.54	8	10	92.342	15.25	9	15	938	102.912	7.02002
	ENSP00000360724	PHPT1 HGNC Symbol|phosphohistidine phosphatase 1 [Source:HGNC Symbol;Acc:30033]|ENSG00000054148|9|ENST00000371661	1		1.13158		0.913645	-;-;1	-;-;1		0.778355	-;-;1	10.48	2	1	4	6.41332e+06					52.36	10.48	1	1	116.173	10.48	1	3	124	13.6627	7.47412
	ENSP00000394071	GDI1 HGNC Symbol|GDP dissociation inhibitor 1 [Source:HGNC Symbol;Acc:4226]|ENSG00000203879|X|ENST00000447750	4	28.1335	0.822682	15.9304	0.913752	1;2;1	1;2;1	32.0365	1.1606	1;2;1	31.77	2	7	28	2.92487e+07	162.47	25.5	6	9	204.542	11.63	4	8	203.602	17.9	5	11	447	50.5501	5.13525
	ENSP00000232564	GNB4 HGNC Symbol|guanine nucleotide binding protein (G protein), beta polypeptide 4 [Source:HGNC Symbol;Acc:20731]|ENSG00000114450|3|ENST00000232564	2		1.07436		0.914604	-;-;1	-;-;1		0.820664	-;-;1	29.71	5	6	79	1.78464e+08	342.548	17.94	4	20	503.34	29.71	6	29	476.26	22.94	5	30	340	37.543	5.99854
	ENSP00000398053	FAHD1 HGNC Symbol|fumarylacetoacetate hydrolase domain containing 1 [Source:HGNC Symbol;Acc:14169]|ENSG00000180185|16|ENST00000427358	2		0.937086	8.33871	0.914765	-;1;1	-;1;1	12.969	0.945859	-;1;1	8.93	3	2	10	1.51999e+07					40.5567	8.93	2	4	59.46	8.93	2	6	224	24.8267	7.38623
	ENSP00000276390	ATP6V1B2 HGNC Symbol|ATPase, H+ transporting, lysosomal 56/58kDa, V1 subunit B2 [Source:HGNC Symbol;Acc:854]|ENSG00000147416|8|ENST00000276390	12	7.66303	0.999434	6.17376	0.915785	4;2;1	4;2;1	7.70763	0.85671	4;2;1	32.88	10	13	66	4.05737e+07	310.019	32.88	13	25	216.048	24.07	10	19	249.717	29.94	12	22	511	56.4649	5.80811
	ENSP00000349053	GANAB HGNC Symbol|glucosidase, alpha; neutral AB [Source:HGNC Symbol;Acc:4138]|ENSG00000089597|11|ENST00000356638	1	12.8295	1.04547	21.1813	0.91637	6;6;5	6;6;5	14.0025	0.85286	6;6;5	53.18	9	42	801	3.20216e+08	4337.25	48.52	40	257	3782.92	52.65	41	265	5008.28	49.05	41	279	944	106.807	6.13818
	ENSP00000360782	PMPCA HGNC Symbol|peptidase (mitochondrial processing) alpha [Source:HGNC Symbol;Acc:18667]|ENSG00000165688|9|ENST00000371717	13	17.2439	1.16968	2.83922	0.916643	11;7;7	11;7;7	15.4715	0.842841	11;7;7	35.05	3	13	77	3.82378e+07	366.198	29.33	12	34	219.428	23.05	10	20	250.087	30.29	12	23	525	58.2156	6.91748
	ENSP00000348693	MYO5A HGNC Symbol|myosin VA (heavy chain 12, myoxin) [Source:HGNC Symbol;Acc:7602]|15|ENSG00000197535|ENST00000356338	8	12.3916	0.698926	24.5104	0.917576	1;2;2	1;2;2	10.5483	1.27755	1;2;2	5.69	11	9	40	1.7072e+07	127.976	3.99	6	15	111.5	4.32	7	14	161.68	3.5	6	11	1828	212.138	8.60205
	ENSP00000245932	VASP HGNC Symbol|vasodilator-stimulated phosphoprotein [Source:HGNC Symbol;Acc:12652]|ENSG00000125753|19|ENST00000245932	7		1.06097	7.78705	0.917655	-;4;1	-;4;1	0.570072	0.810958	-;4;1	24.74	1	7	44	2.08235e+07	117.7	5.79	2	6	219.99	24.74	7	18	220.311	18.16	5	20	380	39.8051	8.93896
	ENSP00000252711	NDUFA10 HGNC Symbol|NADH dehydrogenase (ubiquinone) 1 alpha subcomplex, 10, 42kDa [Source:HGNC Symbol;Acc:7684]|ENSG00000130414|2|ENST00000252711	5		1.1673		0.919019	1;-;-	1;-;-		0.809245	1;-;-	25.92	9	6	16	2.06743e+07	136.34	25.92	6	11	43.24	7.61	3	3	42.53	2.54	1	2	355	40.7249	8.48486
	ENSP00000347336	KHDRBS1 HGNC Symbol|KH domain containing, RNA binding, signal transduction associated 1 [Source:HGNC Symbol;Acc:18116]|ENSG00000121774|1|ENST00000355201	4	32.4846	0.952544	21.0698	0.919246	7;9;12	7;9;12	5.71077	0.941219	7;9;12	20.53	6	6	129	6.24399e+07	341.374	16.23	4	38	506.99	18.85	5	43	590.169	17.9	5	48	419	45.929	7.57666
	ENSP00000299964	NNMT HGNC Symbol|nicotinamide N-methyltransferase [Source:HGNC Symbol;Acc:7861]|ENSG00000166741|11|ENST00000299964	3		1.08733	16.2635	0.919549	-;2;1	-;2;1	32.2244	0.83938	-;2;1	10.98	1	3	10	2.12224e+07					43	10.98	3	4	44.86	8.71	2	6	264	29.5551	5.74463
	ENSP00000358110	ANP32E HGNC Symbol|acidic (leucine-rich) nuclear phosphoprotein 32 family, member E [Source:HGNC Symbol;Acc:16673]|ENSG00000143401|1|ENST00000369114	1		0.883554		0.919762	-;-;1	-;-;1		1.00352	-;-;1	13.42	5	2	6	10524311					31.14	5.37	1	1	31.22	13.42	2	5	149	16.8422	4.24658
	ENSP00000344152	ACADVL HGNC Symbol|acyl-CoA dehydrogenase, very long chain [Source:HGNC Symbol;Acc:92]|ENSG00000072778|17|ENST00000350303	12	12.98	1.01669	2.23889	0.920001	9;6;8	9;6;8	12.6102	0.891387	9;6;8	29.7	4	13	104	6.08568e+07	761.494	23.54	10	39	542.299	21.64	11	32	554.141	28.59	12	33	633	68.0152	8.55811
	ENSP00000439874	ATP6V1A HGNC Symbol|ATPase, H+ transporting, lysosomal 70kDa, V1 subunit A [Source:HGNC Symbol;Acc:851]|ENSG00000114573|3|ENST00000538620	4	4.1568	0.742319	18.3507	0.920359	1;2;2	1;2;2	25.0417	1.23467	1;2;2	24.32	4	10	54	3.39926e+07	310.67	18.84	8	19	258.776	24.32	10	18	281.917	14.73	6	17	584	64.6948	5.65576
	ENSP00000345672	CTSB HGNC Symbol|cathepsin B [Source:HGNC Symbol;Acc:2527]|ENSG00000164733|8|ENST00000353047	3	18.3758	1.08556	27.258	0.920394	4;6;7	4;6;7	11.2405	0.876495	4;6;7	14.75	12	3	62	1.82347e+08	348.808	14.75	3	17	392.35	14.75	3	20	647.202	14.75	3	25	339	37.7968	6.30322
	ENSP00000314311	LARP7 HGNC Symbol|La ribonucleoprotein domain family, member 7 [Source:HGNC Symbol;Acc:24912]|ENSG00000174720|4|ENST00000324052	4	56.969	0.854031	38.635	0.921162	4;1;1	4;1;1	10.7338	1.15075	4;1;1	22.85	4	8	33	6.57385e+06	51.81	14.09	6	15	24.5833	14.78	5	13	33.2433	9.45	4	5	582	66.8574	9.5542
	ENSP00000384355	CTNNBL1 HGNC Symbol|catenin, beta like 1 [Source:HGNC Symbol;Acc:15879]|ENSG00000132792|20|ENST00000405275	7	22.4993	1.15603	11.093	0.921173	4;2;6	4;2;6	10.8364	0.817753	4;2;6	22.57	5	9	31	8.49578e+06	81.3533	8.96	5	10	27.92	11.01	5	7	96.99	19.22	8	14	536	61.9316	5.08447
	ENSP00000261667	KPNA3 HGNC Symbol|karyopherin alpha 3 (importin alpha 4) [Source:HGNC Symbol;Acc:6396]|ENSG00000102753|13|ENST00000261667	6		0.75646	2.15317	0.92133	-;1;3	-;1;3	9.17605	1.16679	-;1;3	12.09	1	6	23	2.44605e+07	105.379	10.56	4	6	109.86	10.56	4	5	158.487	12.09	6	12	521	57.7748	4.94482
	ENSP00000446627	MYL6 HGNC Symbol|myosin, light chain 6, alkali, smooth muscle and non-muscle [Source:HGNC Symbol;Acc:7587]|12|ENSG00000092841|ENST00000553056	2		0.911647	6.40136	0.921388	-;2;3	-;2;3	3.65093	0.978346	-;2;3	23.7	16	2	8	1.68718e+07					72.54	11.85	1	4	153.56	23.7	2	4	135	15.0113	4.99561
	ENSP00000303908	TWF2 HGNC (curated)|Twinfilin-2 (Twinfilin-1-like protein)(A6-related protein)(hA6RP)(Protein tyrosine kinase 9-like) [Source:UniProtKB/Swiss-Prot;Acc:Q6IBS0]|3|ENSG00000173366|ENST00000305533	4		0.916195		0.922197	-;-;1	-;-;1		0.97033	-;-;1	17.77	3	5	15	2.7792e+07					129.01	15.19	4	6	126.69	11.75	4	9	349	39.5233	6.84424
	ENSP00000340211	CORO1B HGNC (automatic)|Coronin-1B (Coronin-2) [Source:UniProtKB/Swiss-Prot;Acc:Q9BR76]|11|ENSG00000172725|ENST00000341356	15	7.80705	0.917063	3.19702	0.922723	15;19;22	15;19;22	9.10954	1.01219	15;19;22	37.22	13	16	164	5.74242e+07	433.378	37.01	15	44	324.015	37.22	16	51	670.534	37.22	16	69	489	54.2003	5.88428
	ENSP00000293831	EIF4A1 HGNC (curated)|Eukaryotic initiation factor 4A-I (eIF-4A-I)(eIF4A-I)(EC 3.6.1.-)(ATP-dependent RNA helicase eIF4A-1) [Source:UniProtKB/Swiss-Prot;Acc:P60842]|17|ENSG00000161960|ENST00000293831	5	34.462	1.1886	32.0665	0.922893	18;18;17	18;18;17	10.699	0.790903	18;18;17	49.51	5	16	247	1.98469e+08	1404.35	47.54	15	77	1282.49	41.13	13	76	1563.53	44.33	15	94	406	46.1246	5.47803
	ENSP00000442399	DLD HGNC Symbol|dihydrolipoamide dehydrogenase [Source:HGNC Symbol;Acc:2898]|ENSG00000091140|7|ENST00000537148	7	32.1159	0.973238	25.224	0.923179	5;3;4	6;3;4	14.5994	0.807753	5;3;4	24.88	5	7	100	7.69795e+07	476.598	24.88	7	36	352.828	24.88	7	32	399.387	24.88	7	32	410	43.5596	7.03467
	ENSP00000234677	SARS HGNC Symbol|seryl-tRNA synthetase [Source:HGNC Symbol;Acc:10537]|ENSG00000031698|1|ENST00000234677	4		0.822568	6.53755	0.923347	-;1;3	-;1;3	36.3276	1.10448	-;1;3	14.98	2	5	15	2.18121e+07	104.867	8.75	3	4	126.09	10.12	3	5	194.46	13.62	4	6	514	58.7401	6.43018
	ENSP00000355330	TGM2 HGNC (curated)|Protein-glutamine gamma-glutamyltransferase 2 (EC 2.3.2.13)(Tissue transglutaminase)(TGase C)(TGC)(TG(C))(Transglutaminase-2)(TGase-H) [Source:UniProtKB/Swiss-Prot;Acc:P21980]|20|ENSG00000198959|ENST00000361475	26	48.0644	1.20406	48.055	0.923364	41;52;51	41;52;51	11.5241	0.725149	41;52;51	54.88	5	27	533	2.30451e+08	2809.41	52.69	26	150	3840.17	52.11	25	186	4256.58	49.93	24	197	687	77.2797	5.22412
	ENSP00000423014	OCIAD2 HGNC Symbol|OCIA domain containing 2 [Source:HGNC Symbol;Acc:28685]|ENSG00000145247|4|ENST00000508632	2		1.33179	4.12897	0.923444	-;1;1	-;1;1	13.335	0.677557	-;1;1	11.69	4	2	4	5.30935e+06					39.35	11.69	2	3	31.42	5.19	1	1	154	16.9426	9.02686
	ENSP00000367939	UQCRQ HGNC (curated)|Cytochrome b-c1 complex subunit 8 (Ubiquinol-cytochrome c reductase complex ubiquinone-binding protein QP-C)(Ubiquinol-cytochrome c reductase complex 9.5 kDa protein)(Complex III subunit VIII)(Complex III subunit 8) [Source:UniProtKB/Swiss-Prot;Acc:O14949]|5|ENSG00000164405|ENST00000378670	5		0.926943	5.35304	0.924546	-;2;2	-;2;2	3.1489	0.964749	-;2;2	63.41	1	5	10	16142169					60.61	54.88	4	5	86.9433	63.41	5	5	82	9.90012	10.0815
	ENSP00000300408	PHB HGNC (curated)|Prohibitin [Source:UniProtKB/Swiss-Prot;Acc:P35232]|17|ENSG00000167085|ENST00000300408	11	12.9794	1.17653	4.78877	0.925569	7;6;8	7;6;8	9.44892	0.79046	7;6;8	72.79	7	11	119	2.76287e+08	640.721	47.43	8	38	781.999	48.9	9	37	1070.74	50	9	44	272	29.7859	5.75732
	ENSP00000308532	DBN1 HGNC Symbol|drebrin 1 [Source:HGNC Symbol;Acc:2695]|ENSG00000113758|5|ENST00000309007	18	6.22572	0.954375	7.15775	0.926251	7;22;27	7;22;27	2.3366	0.916828	7;22;27	35.75	8	18	185	3.49575e+07	243.927	17.1	9	21	894.858	30.2	17	75	1196.51	35.44	17	89	649	71.3854	4.44971
	ENSP00000401206	RRBP1 HGNC Symbol|ribosome binding protein 1 homolog 180kDa (dog) [Source:HGNC Symbol;Acc:10448]|ENSG00000125844|20|ENST00000455029	21	20.0692	1.02096	4.69471	0.926435	3;16;14	3;16;14	13.9502	0.945667	3;16;14	43.41	3	21	148	4.30414e+07	531.863	23.04	12	25	1232.38	37.82	18	59	1267.81	43.41	21	64	751	84.2752	5.0083
	ENSP00000405677	ACIN1 HGNC Symbol|apoptotic chromatin condensation inducer 1 [Source:HGNC Symbol;Acc:17066]|ENSG00000100813|14|ENST00000457657	2	27.678	0.90945	19.2758	0.927117	1;1;1	1;1;1	13.227	1.02309	1;1;1	5.15	6	4	12	2.05781e+07	32.9	2.08	1	2	81.1467	5.15	4	7	81.2967	2.77	2	3	1301	147.275	6.72705
	ENSP00000304405	HNRNPR HGNC Symbol|heterogeneous nuclear ribonucleoprotein R [Source:HGNC Symbol;Acc:5047]|ENSG00000125944|1|ENST00000302271	9	30.9042	0.995175	24.4108	0.927478	15;17;16	15;17;16	7.57376	0.981703	15;17;17	31.44	4	13	211	1.79294e+08	1062.53	26.07	11	68	984.344	26.07	11	67	1167.01	31.44	13	76	633	70.8993	8.1333
	ENSP00000358992	MYO6 HGNC Symbol|myosin VI [Source:HGNC Symbol;Acc:7605]|ENSG00000196586|6|ENST00000369975	9	45.9542	0.90662	54.6133	0.92819	1;2;-	1;2;-		1.00112	1;2;-	10.14	6	13	40	2.526e+07	118.777	5.03	7	11	157.619	8.86	10	14	131.53	8.54	11	15	1253	144.924	8.55811
	ENSP00000316905	SFXN1 HGNC (curated)|Sideroflexin-1 (Tricarboxylate carrier protein)(TCC) [Source:UniProtKB/Swiss-Prot;Acc:Q9H9B4]|5|ENSG00000164466|ENST00000321442	7		0.911118	26.3946	0.929044	-;4;4	-;4;4	22.7155	0.925941	-;4;4	37.89	5	9	73	7.32258e+07	519.105	20.81	5	20	485.08	37.89	9	22	675.938	37.89	9	31	322	35.5963	9.0708
	ENSP00000313311	DNAJC7 HGNC (automatic)|DnaJ homolog subfamily C member 7 (Tetratricopeptide repeat protein 2)(TPR repeat protein 2) [Source:UniProtKB/Swiss-Prot;Acc:Q99615]|17|ENSG00000168259|ENST00000316603	7		0.971626		0.929066	-;-;2	-;-;2		0.921788	-;-;2	14.61	2	7	15	4.02152e+06	49.15	6.39	4	4	51.8533	9.13	5	6	65.1	9.82	4	5	438	50.0648	8.11865
	ENSP00000252699	ACTN4 HGNC (curated)|Alpha-actinin-4 (Non-muscle alpha-actinin 4)(F-actin cross-linking protein) [Source:UniProtKB/Swiss-Prot;Acc:O43707]|19|ENSG00000130402|ENST00000252699	25	22.9198	0.825558	12.2066	0.92993	48;50;48	48;50;48	13.5921	1.08017	48;50;48	63.23	5	34	693	380757082	3572.95	55.1	29	218	3794.2	55.54	29	224	4568.59	59.93	33	251	911	104.788	5.43994
	ENSP00000375887	NCL HGNC Symbol|nucleolin [Source:HGNC Symbol;Acc:7667]|ENSG00000115053|2|ENST00000392033	6	7.67991	1.06318	7.71615	0.930292	19;26;21	19;26;21	9.13323	0.811161	19;26;21	20.1	4	6	277	1.08845e+08	643.114	20.1	6	46	1139.32	20.1	6	125	1173.35	20.1	6	106	602	65.8416	4.64014
	ENSP00000400292	SART3 HGNC Symbol|squamous cell carcinoma antigen recognized by T cells 3 [Source:HGNC Symbol;Acc:16860]|12|ENSG00000075856|ENST00000412617	13	44.5395	0.884384	31.4906	0.930332	8;9;6	8;9;6	3.17095	1.06579	8;9;6	20.6	8	13	74	1.58228e+07	322.024	18.6	12	28	228.145	17.31	11	24	212.295	15.88	10	22	699	81.8238	6.06201
	ENSP00000435289	PAFAH1B2 HGNC Symbol|platelet-activating factor acetylhydrolase 1b, catalytic subunit 2 (30kDa) [Source:HGNC Symbol;Acc:8575]|ENSG00000168092|11|ENST00000527958	3		1.56569		0.930917	-;1;-	-;1;-		0.575632	-;1;-	17.47	4	3	5	2.92845e+07					39.59	14.41	2	2	84.9	11.35	2	3	229	25.5531	5.92236
	ENSP00000357822	MRPL9 HGNC Symbol|mitochondrial ribosomal protein L9 [Source:HGNC Symbol;Acc:14277]|ENSG00000143436|1|ENST00000368829	1		0.919246		0.931152	-;1;-	-;1;-		0.980687	-;1;-	5.15	2	1	2	3.55424e+06					14.21	5.15	1	2					233	26.1682	10.0669
	ENSP00000377833	ANXA4 HGNC Symbol|annexin A4 [Source:HGNC Symbol;Acc:542]|ENSG00000196975|2|ENST00000394295	18		0.871055	1.35685	0.931848	-;7;8	-;7;8	9.97468	1.07843	-;7;8	58.57	3	19	124	1.79435e+08	280.956	20.25	8	20	766.055	54.21	17	48	799.759	58.57	19	56	321	36.0622	6.12549
	ENSP00000351339	FLNB HGNC Symbol|filamin B, beta [Source:HGNC Symbol;Acc:3755]|ENSG00000136068|3|ENST00000358537	46	34.8766	1.18521	21.4627	0.932052	85;126;115	85;126;115	15.3742	0.900768	85;127;115	41.12	10	51	1118	4.76443e+08	4683.85	30.88	43	276	6802.09	37.2	48	426	6892.69	39.53	50	416	2578	275.496	5.78271
	ENSP00000383086	CSNK2A1 HGNC Symbol|casein kinase 2, alpha 1 polypeptide [Source:HGNC Symbol;Acc:2457]|ENSG00000101266|20|ENST00000400227	6	4.47145	1.11495	12.6313	0.932566	1;3;3	1;3;3	12.3373	0.794731	1;3;3	30.39	4	7	26	2.37882e+07	62.53	11.43	3	6	132.22	22.08	5	9	103.349	25.71	6	11	385	45.2819	7.94287
	ENSP00000298299	ZNF22 HGNC Symbol|zinc finger protein 22 (KOX 15) [Source:HGNC Symbol;Acc:13012]|ENSG00000165512|10|ENST00000298299	2		0.79725		0.932579	-;1;-	-;1;-		1.13249	-;1;-	11.16	1	3	35	9.54869e+06	26.13	2.23	1	9	45.8043	11.16	3	13	36.2775	8.04	2	13	224	25.8989	10.0376
	ENSP00000392494	DDX3X HGNC Symbol|DEAD (Asp-Glu-Ala-Asp) box polypeptide 3, X-linked [Source:HGNC Symbol;Acc:2745]|ENSG00000215301|X|ENST00000457138	7	10.3481	0.919362	14.5074	0.932834	8;7;10	8;7;10	11.1713	1.04106	8;7;10	37.46	4	18	230	1.43028e+08	1147.76	32.66	16	70	1374.82	32.2	16	80	1481.32	34.67	17	80	646	71.3109	6.62451
	ENSP00000380033	DDX17 HGNC Symbol|DEAD (Asp-Glu-Ala-Asp) box polypeptide 17 [Source:HGNC Symbol;Acc:2740]|ENSG00000100201|22|ENST00000396821	20	52.0965	0.882091	40.6775	0.932869	29;27;28	29;27;28	5.53113	0.991778	29;27;28	57.05	5	29	384	2.53784e+08	2280.72	52.26	25	131	1951.4	51.85	24	122	2242.99	51.71	23	131	731	80.3892	8.36768
	ENSP00000300413	SNRPD1 HGNC Symbol|small nuclear ribonucleoprotein D1 polypeptide 16kDa [Source:HGNC Symbol;Acc:11158]|ENSG00000167088|18|ENST00000300413	2		0.966002	10.7491	0.933758	-;1;1	-;1;1	1.63794	0.934607	-;1;1	31.09	1	2	14	1.0369e+08	64.7433	9.24	1	3	97.03	31.09	2	5	96.51	31.09	2	6	119	13.2734	11.561
	ENSP00000316029	TLN1 HGNC (curated)|Talin-1 [Source:UniProtKB/Swiss-Prot;Acc:Q9Y490]|9|ENSG00000137076|ENST00000314888	53	32.6837	1.00335	24.3207	0.934328	44;64;53	44;64;53	17.1814	0.957798	44;64;53	34.51	4	53	452	1.04108e+08	1501.16	24.87	42	123	2045.47	30.78	49	164	2111.83	31.6	48	165	2541	269.599	6.07471
	ENSP00000304802	DTYMK HGNC Symbol|deoxythymidylate kinase (thymidylate kinase) [Source:HGNC Symbol;Acc:3061]|ENSG00000168393|2|ENST00000305784	5		1.09812	56.7724	0.935256	-;2;1	-;2;1	28.4131	0.787889	-;2;1	22.64	5	6	26	1.93202e+07	0	6.13	2	3	187.373	22.64	6	13	183.057	17.45	4	10	212	23.8045	8.26514
	ENSP00000229446	BCLAF1 HGNC Symbol|BCL2-associated transcription factor 1 [Source:HGNC Symbol;Acc:16863]|ENSG00000029363|6|ENST00000353331	10	54.9352	0.841633	53.431	0.936581	7;7;6	7;7;6	10.8679	1.11988	7;7;6	22.09	9	12	53	5.23692e+07	248.107	16.69	9	19	149.36	19.79	10	18	146.268	15.19	8	16	869	100.172	9.94971
	ENSP00000324804	PPP2R1A HGNC Symbol|protein phosphatase 2, regulatory subunit A, alpha [Source:HGNC Symbol;Acc:9302]|ENSG00000105568|19|ENST00000322088	12	17.3367	0.964166	17.7003	0.938654	15;11;12	15;11;12	11.4039	0.978647	15;11;12	25.98	17	12	131	9.38967e+07	911.965	25.98	12	47	860.333	25.98	12	40	1113.76	24.79	11	44	589	65.2669	5.10986
	ENSP00000362532	RPRD1B HGNC Symbol|regulation of nuclear pre-mRNA domain containing 1B [Source:HGNC Symbol;Acc:16209]|ENSG00000101413|20|ENST00000373433	2		1.0265		0.939064	-;1;-	-;1;-		0.885686	-;1;-	9.2	2	3	7	1.84047e+07	0	2.45	1	1	46.77	9.2	3	3	0	2.45	1	3	326	36.8772	5.97314
	ENSP00000370808	SLC25A6 HGNC (curated)|ADP/ATP translocase 3 (Adenine nucleotide translocator 2)(ANT 3)(ADP,ATP carrier protein 3)(Solute carrier family 25 member 6)(ADP,ATP carrier protein, isoform T2) [Source:UniProtKB/Swiss-Prot;Acc:P12236]|X|ENSG00000169100|ENST00000381401	4	15.2756	1.11968	5.5052	0.939354	6;4;5	6;4;5	14.2198	0.833215	6;4;5	59.4	3	11	135	3.12232e+08	944.141	59.4	11	48	1125.87	48.99	10	46	1238.78	48.99	10	41	298	32.8452	9.74463
	ENSP00000435379	CTNND1 HGNC Symbol|catenin (cadherin-associated protein), delta 1 [Source:HGNC Symbol;Acc:2515]|ENSG00000198561|11|ENST00000532649	21	52.6049	0.905276	45.3195	0.939611	21;17;13	21;17;13	10.4135	1.13052	21;17;13	30.94	26	21	194	4.0115e+07	881.632	28.9	19	67	833.794	25.82	18	65	953.331	22.87	15	62	879	97.9886	7.45947
	ENSP00000327070	MDH2 HGNC Symbol|malate dehydrogenase 2, NAD (mitochondrial) [Source:HGNC Symbol;Acc:6971]|ENSG00000146701|7|ENST00000315758	4	15.2819	1.09811	8.53037	0.939868	17;14;21	17;14;21	9.57041	0.849095	17;14;21	25.74	3	4	111	1.05545e+08	585.273	25.74	4	37	520.744	25.74	4	30	785.886	25.74	4	44	338	35.4807	8.67529
	ENSP00000337132	DAZAP1 HGNC Symbol|DAZ associated protein 1 [Source:HGNC Symbol;Acc:2683]|ENSG00000071626|19|ENST00000336761	5	16.5113	0.982376	16.4276	0.940748	6;13;13	6;13;13	5.81199	0.960747	6;13;13	24.07	2	6	60	2.47513e+07	77.0089	10.58	3	14	130.096	16.93	5	24	156.235	17.72	4	22	378	40.5038	8.27979
	ENSP00000376309	HNRNPA3 HGNC Symbol|heterogeneous nuclear ribonucleoprotein A3 [Source:HGNC Symbol;Acc:24941]|ENSG00000170144|2|ENST00000392524	7	29.6792	1.07483	24.2747	0.940787	14;19;21	14;19;21	10.4287	0.856632	14;19;21	35.71	7	8	162	2.00549e+08	554.069	24.07	6	43	723.163	31.22	7	62	753.69	35.71	8	57	378	39.5706	9.01221
	ENSP00000395449	RECQL HGNC Symbol|RecQ protein-like (DNA helicase Q1-like) [Source:HGNC Symbol;Acc:9948]|12|ENSG00000004700|ENST00000421138	4	22.0413	0.789204	7.80422	0.940841	1;4;3	1;4;3	5.04454	1.1363	1;4;3	9.4	2	4	23	5.58754e+07	97.61	8.17	3	11	98.7567	9.4	4	7	78.18	9.4	4	5	649	73.41	7.88428
	ENSP00000438578	CHD4 HGNC Symbol|chromodomain helicase DNA binding protein 4 [Source:HGNC Symbol;Acc:1919]|12|ENSG00000111642|ENST00000537464	20	67.9798	1.00352	55.2139	0.941107	3;3;2	3;3;2	9.62836	0.998465	3;3;2	15.96	14	22	67	3.08756e+07	359.78	13.52	17	28	237.703	11.35	15	22	226.36	10.5	15	17	1886	215.175	5.89697
	ENSP00000391852	SRRT HGNC Symbol|serrate RNA effector molecule homolog (Arabidopsis) [Source:HGNC Symbol;Acc:24101]|ENSG00000087087|7|ENST00000432932	14	45.1188	0.90045	39.3165	0.941192	3;4;8	3;4;8	5.19063	1.05029	3;4;8	22.85	6	18	82	2.50357e+07	194.416	12.97	11	22	230.104	11.83	8	25	258.852	20.55	16	35	871	100.085	6.01123
	ENSP00000416034	CHID1 HGNC (curated)|Chitinase domain-containing protein 1 Precursor (Stabilin-1-interacting chitinase-like protein)(SI-CLP) [Source:UniProtKB/Swiss-Prot;Acc:Q9BWS9]|11|ENSG00000177830|ENST00000429789	2	29.0844	0.867581	24.401	0.941754	1;1;1	1;1;1	3.4326	1.0808	1;1;1	6.63	8	3	29	2.14464e+07	0	4.42	2	6	23.14	6.63	3	12	22.27	6.63	3	11	362	41.6514	8.63135
	ENSP00000364289	NCBP1 HGNC Symbol|nuclear cap binding protein subunit 1, 80kDa [Source:HGNC Symbol;Acc:7658]|9|ENSG00000136937|ENST00000375147	10	48.5016	0.719822	41.3445	0.942287	1;1;2	1;1;2	9.82701	1.32796	1;1;2	15.57	1	10	23	1.15769e+07	77.2533	8.23	5	8	44.2367	9.49	6	6	58.2699	11.39	8	9	790	91.7805	6.43018
	ENSP00000368031	ATAD3A HGNC Symbol|ATPase family, AAA domain containing 3A [Source:HGNC Symbol;Acc:25567]|ENSG00000197785|1|ENST00000378756	24	6.88025	1.01485	3.04649	0.943085	17;15;13	17;15;13	6.41559	0.944805	17;15;13	50.34	15	25	187	4.52278e+07	554.68	41.64	22	64	577.526	42.15	23	62	583.97	44.2	23	61	586	66.1772	9.24658
	ENSP00000258772	DDX56 HGNC Symbol|DEAD (Asp-Glu-Ala-Asp) box polypeptide 56 [Source:HGNC Symbol;Acc:18193]|7|ENSG00000136271|ENST00000258772	5	48.6692	1.11824		0.943142	1;-;1	1;-;1	18.2712	0.884554	1;-;1	10.97	5	5	12	5.51045e+06	133	8.78	4	7	85.97	3.66	2	2	97.14	6.58	3	3	547	61.551	9.26123
	ENSP00000370589	NOP56 HGNC Symbol|NOP56 ribonucleoprotein homolog (yeast) [Source:HGNC Symbol;Acc:15911]|ENSG00000101361|20|ENST00000329276	18	39.1045	0.919478	26.0757	0.943494	40;25;32	40;25;32	11.5559	1.01347	40;25;32	46.46	8	19	287	5.50585e+07	1142.34	46.46	19	108	741.069	43.6	18	80	1086.3	43.6	18	99	594	66.0087	9.18799
	ENSP00000256854	NARS HGNC Symbol|asparaginyl-tRNA synthetase [Source:HGNC Symbol;Acc:7643]|ENSG00000134440|18|ENST00000256854	12	42.2269	1.10639	33.0152	0.943505	5;5;6	5;5;6	19.5513	0.917869	5;5;6	28.65	4	13	73	2.86617e+07	231.99	27.55	12	20	235.951	25.36	12	24	324.942	24.27	11	29	548	62.9025	6.25244
	ENSP00000363500	CLIC4 HGNC Symbol|chloride intracellular channel 4 [Source:HGNC Symbol;Acc:13518]|ENSG00000169504|1|ENST00000374379	4		0.836098	8.23974	0.944109	-;4;5	-;4;5	25.917	1.09467	-;4;5	29.25	1	4	42	5.673e+07	53.48	3.16	1	4	237.42	29.25	4	15	228.469	29.25	4	23	253	28.7537	5.59229
	ENSP00000441785	BSG HGNC Symbol|basigin (Ok blood group) [Source:HGNC Symbol;Acc:1116]|ENSG00000172270|19|ENST00000545507	3	112.72	3.23747	51.0072	0.944882	1;1;1	1;1;1	88.4294	0.638812	1;1;1	33.52	4	3	34	6.50668e+07	244.158	33.52	3	9	206.37	33.52	3	11	232.948	28.41	2	14	176	19.4258	6.68311
	ENSP00000417306	SSR3 HGNC (curated)|Translocon-associated protein subunit gamma (TRAP-gamma)(Signal sequence receptor subunit gamma)(SSR-gamma) [Source:UniProtKB/Swiss-Prot;Acc:Q9UNL2]|3|ENSG00000114850|ENST00000463503	2	15.7969	0.935727	10.2556	0.945721	2;2;1	2;2;1	2.46292	1.00161	2;2;1	12.03	4	2	10	1.06449e+07	41.16	12.03	2	4	55.19	12.03	2	3	46.0176	12.03	2	3	133	15.1031	9.62744
	ENSP00000447000	RP11-762I7.5.1 Clone-based (Vega)||12|ENSG00000257390|ENST00000546837	6		0.887419	14.8918	0.946865	-;4;4	-;4;4	10.8288	1.03473	-;4;4	19.69	5	7	22	4.20231e+07					146.707	17.02	6	14	196.246	18.55	6	8	523	59.1482	8.5874
	ENSP00000382880	VAPA HGNC (curated)|Vesicle-associated membrane protein-associated protein A (VAMP-associated protein A)(VAMP-A)(VAP-A)(33 kDa Vamp-associated protein)(VAP-33) [Source:UniProtKB/Swiss-Prot;Acc:Q9P0L0]|18|ENSG00000101558|ENST00000400000	5	5.28808	0.851709	4.32812	0.947056	6;10;11	7;10;11	4.22019	1.13223	6;10;11	23.29	2	5	82	4.00261e+07	123.553	18.07	4	18	447.612	23.29	5	32	556.862	23.29	5	32	249	27.8752	8.6167
	ENSP00000306920	GLB1 HGNC Symbol|galactosidase, beta 1 [Source:HGNC Symbol;Acc:4298]|ENSG00000170266|3|ENST00000307363	8	12.259	1.07901	6.90205	0.94717	2;4;4	2;4;4	12.4507	0.84963	2;4;4	15.21	7	9	61	3.30897e+07	170.051	12.7	8	21	164.977	14.03	8	21	160.512	11.52	7	19	677	75.9735	6.49365
	ENSP00000331201	HGS HGNC Symbol|hepatocyte growth factor-regulated tyrosine kinase substrate [Source:HGNC Symbol;Acc:4897]|ENSG00000185359|17|ENST00000329138	4		0.696214		0.947684	-;-;1	-;-;1		1.31221	-;-;1	6.31	2	5	19	6.96749e+06	61.91	4.38	3	5	81.97	5.28	4	7	99.76	5.41	4	7	777	86.1376	6.16357
	ENSP00000295470	HNRPDL HGNC (curated)|Heterogeneous nuclear ribonucleoprotein D-like (hnRPD-like protein)(hnHNRP-DL)(JKT41-binding protein)(AU-rich element RNA-binding factor)(Protein laAUF1) [Source:UniProtKB/Swiss-Prot;Acc:O14979]|4|ENSG00000152795|ENST00000295470	4		1.0523	5.44623	0.949068	-;8;11	-;8;11	25.4234	0.966142	-;8;11	20	2	6	54	3.07203e+07	25.57	3.57	2	2	208.443	15.95	4	17	459.322	20	6	35	420	46.4091	9.56885
	ENSP00000357564	RAB13 HGNC (curated)|Ras-related protein Rab-13 (Cell growth-inhibiting gene 4 protein) [Source:UniProtKB/Swiss-Prot;Acc:P51153]|1|ENSG00000143545|ENST00000368575	2		1.09417	16.8616	0.949857	-;1;1	-;1;1	2.1371	0.840607	-;1;1	12.32	1	2	5	1.66197e+07					36.5033	12.32	2	3	31.07	12.32	2	2	203	22.7597	9.18799
	ENSP00000412045	TXNRD1 HGNC Symbol|thioredoxin reductase 1 [Source:HGNC Symbol;Acc:12437]|ENSG00000198431|12|ENST00000429002	9	47.8703	1.16924	49.477	0.949967	6;8;5	6;8;5	11.9408	0.757106	6;8;5	27.98	17	11	88	5.05955e+07	270.62	23.8	10	25	290.96	27.98	11	29	349.08	23.8	10	34	647	70.6542	7.38623
	ENSP00000424087	HNRNPH1 HGNC Symbol|heterogeneous nuclear ribonucleoprotein H1 (H) [Source:HGNC Symbol;Acc:5041]|ENSG00000169045|5|ENST00000505811	1	52.2042	1.06851		0.950206	1;-;1	1;-;1	8.04868	0.913084	1;-;1	53.3	16	7	206	2.46334e+08	1049.56	50.94	6	68	1180.06	47.17	6	73	1282.01	50.94	6	65	212	24.0631	7.45947
	ENSP00000390336	SF3A1 HGNC Symbol|splicing factor 3a, subunit 1, 120kDa [Source:HGNC Symbol;Acc:10765]|ENSG00000099995|22|ENST00000439242	10	51.7154	0.823992	40.9772	0.950902	8;4;5	8;4;5	9.23055	1.15755	8;4;5	20.19	6	10	51	4.40959e+07	195.75	20.19	10	17	152.302	15.52	8	15	144.133	15.93	8	19	728	81.6268	5.33838
	ENSP00000330945	TMED9 HGNC (curated)|Transmembrane emp24 domain-containing protein 9 Precursor (Glycoprotein 25L2) [Source:UniProtKB/Swiss-Prot;Acc:Q9BVK6]|5|ENSG00000184840|ENST00000332598	6	22.4614	0.915471	21.4827	0.951306	7;6;9	7;6;9	11.194	1.03062	7;6;9	62.55	2	9	42	3.22003e+07	93.45	27.23	4	10	116.296	62.55	8	14	140.803	44.26	7	18	235	27.2602	8.01611
	ENSP00000364802	HSPA1A HGNC (curated)|Heat shock 70 kDa protein 1 (HSP70.1)(HSP70-1/HSP70-2) [Source:UniProtKB/Swiss-Prot;Acc:P08107]|6|ENSG00000204389|ENST00000375651	4	8.36255	0.971411	4.46158	0.9514	19;16;19	19;16;19	5.60416	0.953315	19;16;19	33.7	11	15	305	4.05624e+08	1535.09	33.7	14	104	1345.3	30.89	14	92	1681.93	30.89	14	109	641	70.009	5.65576
	ENSP00000338477	HNRNPF HGNC Symbol|heterogeneous nuclear ribonucleoprotein F [Source:HGNC Symbol;Acc:5039]|ENSG00000169813|10|ENST00000337970	10	18.1309	1.00102	3.66535	0.951594	18;14;20	18;14;20	10.1149	0.954751	18;14;20	45.3	2	11	255	2.25276e+08	1608.42	45.3	11	81	1739.75	45.06	10	86	2126.57	45.3	11	88	415	45.6429	5.57959
	ENSP00000318297	RUVBL1 HGNC Symbol|RuvB-like 1 (E. coli) [Source:HGNC Symbol;Acc:10474]|ENSG00000175792|3|ENST00000322623	8	12.9662	1.00016	16.4236	0.951605	5;4;5	5;4;5	1.29184	0.903129	5;4;5	31.36	7	9	71	7.11229e+07	364.399	31.36	9	25	270.145	30.04	8	21	387.221	30.04	8	25	456	50.1963	6.41748
	ENSP00000253024	TRIM28 HGNC Symbol|tripartite motif containing 28 [Source:HGNC Symbol;Acc:16384]|ENSG00000130726|19|ENST00000253024	18	38.6514	1.05096	33.2275	0.952055	53;40;42	53;40;42	1.07705	0.867544	53;40;44	46.59	2	20	374	9.87064e+07	2235.91	46.59	20	135	1881.27	41.8	18	125	2067.65	44.55	19	114	835	88.4934	5.77002
	ENSP00000367460	HNRNPUL1 HGNC Symbol|heterogeneous nuclear ribonucleoprotein U-like 1 [Source:HGNC Symbol;Acc:17011]|ENSG00000105323|19|ENST00000378215	14	65.2342	1.06369	57.5678	0.952815	15;10;10	15;10;10	1.10851	0.972269	15;10;10	29.92	5	15	121	9.45318e+07	754.434	29.92	15	49	599.86	19.68	11	33	673.368	20.88	12	39	752	84.4472	9.14404
	ENSP00000346246	AP2A1 HGNC Symbol|adaptor-related protein complex 2, alpha 1 subunit [Source:HGNC Symbol;Acc:561]|19|ENSG00000196961|ENST00000354293	10	19.2062	0.92985	5.51542	0.953905	1;3;4	1;3;4	12.4331	1.03668	1;3;4	20.1	4	17	109	4.52762e+07	549.28	13.3	11	29	725.375	18.32	15	40	823.898	17.28	15	40	955	105.295	7.66455
	ENSP00000268182	IQGAP1 HGNC Symbol|IQ motif containing GTPase activating protein 1 [Source:HGNC Symbol;Acc:6110]|ENSG00000140575|15|ENST00000268182	27	15.4329	0.793325	12.4419	0.954005	18;21;21	18;21;21	13.618	1.23093	18;21;21	27.16	22	29	244	1.02574e+08	805.483	22.33	25	75	840.277	21.85	24	73	1383.57	25.77	28	96	1657	189.134	6.48096
	ENSP00000304350	PRPF8 HGNC Symbol|PRP8 pre-mRNA processing factor 8 homolog (S. cerevisiae) [Source:HGNC Symbol;Acc:17340]|17|ENSG00000174231|ENST00000304992	32	47.3333	0.902609	38.723	0.954127	11;10;12	11;10;12	10.2948	1.083	11;10;12	18.59	2	35	106	5.30863e+07	323.427	14.22	28	31	222.057	10.84	23	33	345.33	15.03	29	42	2335	273.427	8.83643
	ENSP00000232888	RRP9 HGNC Symbol|ribosomal RNA processing 9, small subunit (SSU) processome component, homolog (yeast) [Source:HGNC Symbol;Acc:16829]|ENSG00000114767|3|ENST00000232888	9	25.3506	1.0129	19.1327	0.954466	4;2;5	4;2;5	21.5818	0.975708	4;2;5	25.47	2	10	40	9.60044e+06	111.985	23.37	9	16	123.11	14.53	5	11	136.292	21.47	8	13	475	51.8085	7.85498
	ENSP00000333298	LAMP1 HGNC Symbol|lysosomal-associated membrane protein 1 [Source:HGNC Symbol;Acc:6499]|ENSG00000185896|13|ENST00000332556	4	18.9644	0.977314	29.0065	0.954898	9;11;12	9;11;12	17.1583	0.84225	9;11;12	12.23	2	4	94	9.0876e+07	350.777	12.23	4	30	284.682	12.23	4	32	237.957	12.23	4	32	417	44.8538	8.74854
	ENSP00000398990	YWHAQ HGNC Symbol|tyrosine 3-monooxygenase/tryptophan 5-monooxygenase activation protein, theta polypeptide [Source:HGNC Symbol;Acc:12854]|ENSG00000134308|2|ENST00000446619	2	28.817	1.05065	31.4631	0.956249	1;2;3	1;2;3	8.57497	0.895211	1;2;3	49.66	2	5	59	7.23958e+07	142.001	22.15	3	12	327.559	49.66	5	23	345.717	37.58	4	24	149	17.0376	5.78271
	ENSP00000269848	PFKL HGNC (curated)|6-phosphofructokinase, liver type (EC 2.7.1.11)(Phosphofructokinase 1)(Phosphohexokinase)(Phosphofructo-1-kinase isozyme B)(PFK-B) [Source:UniProtKB/Swiss-Prot;Acc:P17858]|21|ENSG00000141959|ENST00000349048	8		0.697679		0.957306	-;-;1	-;-;1		1.32275	-;-;1	23.59	4	13	115	4.84011e+07	368.726	13.59	7	36	357.264	11.92	7	37	574.21	20.9	12	42	780	84.9642	7.50342
	ENSP00000404426	MRPL39 HGNC Symbol|mitochondrial ribosomal protein L39 [Source:HGNC Symbol;Acc:14027]|ENSG00000154719|21|ENST00000419219	6	7.35154	1.16737	7.00774	0.957954	2;1;3	2;1;3	10.7747	0.808604	2;1;3	21.55	3	6	25	1.26702e+07	22.47	4.38	2	7	142.767	21.55	6	10	98.1495	8.42	4	8	297	34.0104	8.14795
	ENSP00000340278	PARK7 HGNC Symbol|Parkinson disease (autosomal recessive, early onset) 7 [Source:HGNC Symbol;Acc:16369]|ENSG00000116288|1|ENST00000338639	1		1.18698	12.4216	0.95824	-;1;1	-;1;1	32.9543	0.808064	-;1;1	13.23	1	2	3	2.38359e+07					26.34	13.23	2	2	32.59	10.58	1	1	189	19.8785	6.78564
	ENSP00000383237	RRP1 HGNC Symbol|ribosomal RNA processing 1 homolog (S. cerevisiae) [Source:HGNC Symbol;Acc:18785]|ENSG00000160214|21|ENST00000400387	4		0.919264		0.959538	-;2;-	-;2;-		1.01056	-;2;-	9.76	3	4	22	3.1089e+06	144.341	3.9	2	6	205.156	9.76	4	10	117.5	7.16	3	6	461	52.9526	9.40771
	ENSP00000272317	RPS27A HGNC (curated)|Ubiquitin [Source:UniProtKB/Swiss-Prot;Acc:P62988]|2|ENSG00000143947|ENST00000272317	6	1.81097	1.02471	3.92169	0.959988	24;33;27	24;33;27	5.90707	0.932774	24;33;27	53.21	19	6	230	3.84509e+08	1342.06	31.41	3	62	1913.86	53.21	6	86	1612.01	53.21	6	82	156	17.9535	9.64209
	ENSP00000373404	MRPL2 HGNC (curated)|39S ribosomal protein L2, mitochondrial Precursor (L2mt)(MRP-L2) [Source:UniProtKB/Swiss-Prot;Acc:Q5T653]|6|ENSG00000112651|ENST00000388752	3		0.514584	6.01394	0.960459	-;2;2	-;2;2	10.9771	1.81962	-;2;2	16.07	2	4	15	2.15921e+07					66.29	16.07	4	7	43.6733	8.85	3	8	305	33.2797	11.2974
	ENSP00000379362	SCO1 HGNC Symbol|SCO cytochrome oxidase deficient homolog 1 (yeast) [Source:HGNC Symbol;Acc:10603]|ENSG00000133028|17|ENST00000396047	2		1.21222	0.42486	0.961303	-;1;2	-;1;2	1.34399	0.766146	-;1;2	13.33	2	2	6	1.39978e+07					40.7367	7.41	1	3	53.2667	13.33	2	3	270	30.1598	9.56885
	ENSP00000358921	ACTR1A HGNC Symbol|ARP1 actin-related protein 1 homolog A, centractin alpha (yeast) [Source:HGNC Symbol;Acc:167]|ENSG00000138107|10|ENST00000369905	8	24.2588	1.10801	22.4872	0.961334	3;3;4	3;3;4	25.6855	0.930834	3;3;4	40.43	5	9	117	9.54003e+08	166.277	22.87	6	31	199.01	28.19	7	41	312.908	27.13	7	45	376	42.5869	6.63916
	ENSP00000290541	PSMB4 HGNC Symbol|proteasome (prosome, macropain) subunit, beta type, 4 [Source:HGNC Symbol;Acc:9541]|ENSG00000159377|1|ENST00000290541	2		1.20656	3.08511	0.962022	-;1;1	-;1;1	2.08579	0.770759	-;1;1	8.71	1	2	11	3.09988e+07	24.08	3.03	1	2	65.6969	8.71	2	4	54.73	8.71	2	5	264	29.1855	5.97314
	ENSP00000437130	NAP1L4 HGNC Symbol|nucleosome assembly protein 1-like 4 [Source:HGNC Symbol;Acc:7640]|ENSG00000205531|11|ENST00000531291	4	27.3361	0.887079		0.962108	3;-;4	3;-;4	6.11725	1.10945	3;-;4	49.53	14	4	11	1.86535e+07	43.3972	49.53	4	5					52.1472	49.53	4	6	107	12.2423	8.1626
	ENSP00000397552	ACTL6A HGNC Symbol|actin-like 6A [Source:HGNC Symbol;Acc:24124]|ENSG00000136518|3|ENST00000429709	6	26.3182	0.964411	16.5313	0.962865	6;4;5	6;4;5	2.69453	1.00143	6;4;5	24.94	2	7	32	1.3608e+07	83.5957	24.94	6	11	73.76	9.56	4	9	103.18	17.48	5	12	429	47.4303	5.60498
	ENSP00000443664	COPS2 HGNC Symbol|COP9 constitutive photomorphogenic homolog subunit 2 (Arabidopsis) [Source:HGNC Symbol;Acc:30747]|15|ENSG00000166200|ENST00000542928	4	15.9413	0.972531	15.7847	0.963346	3;2;2	3;2;2	8.17947	0.985943	3;2;2	10.82	6	4	17	1.17293e+07	62.4733	8.71	3	6	85.3478	8.44	3	7	56.2452	8.44	3	4	379	44.2004	5.87158
	ENSP00000264279	NOP58 HGNC Symbol|NOP58 ribonucleoprotein homolog (yeast) [Source:HGNC Symbol;Acc:29926]|ENSG00000055044|2|ENST00000264279	8	30.7326	1.0695	24.7958	0.963975	11;7;11	11;7;11	12.4401	0.906948	11;7;11	23.25	2	8	107	5.4069e+07	882.336	23.25	8	43	574.35	23.25	8	34	652.053	23.25	8	30	529	59.5405	8.92432
	ENSP00000357456	ADAR HGNC (curated)|Double-stranded RNA-specific adenosine deaminase (DRADA)(EC 3.5.4.-)(136 kDa double-stranded RNA-binding protein)(P136)(K88DSRBP)(Interferon-inducible protein 4)(IFI-4) [Source:UniProtKB/Swiss-Prot;Acc:P55265]|1|ENSG00000160710|ENST00000368471	13	26.9779	0.984017	27.838	0.965078	11;13;12	11;13;12	12.1125	0.968039	11;13;12	17.62	13	14	131	3.22478e+07	322.72	17.62	14	45	349.174	17.62	14	41	451.242	17.62	14	45	931	103.576	8.66064
	ENSP00000239944	SERP1 HGNC Symbol|stress-associated endoplasmic reticulum protein 1 [Source:HGNC Symbol;Acc:10759]|ENSG00000120742|3|ENST00000239944	2		0.939672	9.99014	0.965105	-;2;2	-;2;2	3.59497	0.994449	-;2;2	31.82	6	2	7	3.08717e+06					41.3933	31.82	2	4	43.9533	31.82	2	3	66	7.36893	11.0044
	ENSP00000367263	AHNAK HGNC (automatic)|Neuroblast differentiation-associated protein AHNAK (Desmoyokin) [Source:UniProtKB/Swiss-Prot;Acc:Q09666]|11|ENSG00000124942|ENST00000378024	16	23.4986	0.717513	8.75924	0.965728	4;10;9	4;10;9	19.1595	1.3818	4;10;9	4.4	8	16	122	1.28232e+08	390.274	2.09	8	23	1025.53	3.97	15	51	1060.64	3.31	13	48	5890	628.699	6.15088
	ENSP00000322887	CIRBP HGNC Symbol|cold inducible RNA binding protein [Source:HGNC Symbol;Acc:1982]|ENSG00000099622|19|ENST00000320936	3		1.07363	0.999493	0.96603	-;3;3	-;3;3	5.44748	0.903692	-;3;3	18.6	2	3	20	8.9006e+06					125.608	18.6	3	9	215.59	18.6	3	11	172	18.6367	9.51025
	ENSP00000361259	C10orf58 HGNC Symbol|chromosome 10 open reading frame 58 [Source:HGNC Symbol;Acc:28651]|ENSG00000122378|10|ENST00000372185	5	34.278	1.20952	10.1042	0.966076	3;4;3	3;4;3	21.8842	0.807021	3;4;3	42.2	2	5	59	5.97597e+07	125.228	28.9	4	16	106.204	28.9	4	18	171.277	33.49	4	25	218	24.4469	9.01221
	ENSP00000359258	GCLM HGNC Symbol|glutamate-cysteine ligase, modifier subunit [Source:HGNC Symbol;Acc:4312]|ENSG00000023909|1|ENST00000370238	3		1.54447	8.00704	0.966898	-;2;1	-;2;1	10.4257	0.610818	-;2;1	10.95	1	3	6	7.44396e+06					40.2667	10.95	3	3	21.57	8.03	2	3	274	30.7078	6.02393
	ENSP00000264724	MAP4 HGNC Symbol|microtubule-associated protein 4 [Source:HGNC Symbol;Acc:6862]|ENSG00000047849|3|ENST00000264724	6		0.924028	9.49103	0.96779	-;5;4	-;5;4	39.2132	0.994272	-;5;4	16.8	10	7	15	2.76761e+07					52.6233	11.5	5	7	58.38	15.22	6	8	887	92.6883	9.42236
	ENSP00000402836	PPIH HGNC Symbol|peptidylprolyl isomerase H (cyclophilin H) [Source:HGNC Symbol;Acc:14651]|ENSG00000171960|1|ENST00000440068	2		0.820052	3.46113	0.968846	-;1;1	-;1;1	10.851	1.15053	-;1;1	15.97	4	2	4	1.27173e+07					27.57	10.42	1	2	25.46	15.97	2	2	144	15.79	8.71924
	ENSP00000256383	EIF2S1 HGNC Symbol|eukaryotic translation initiation factor 2, subunit 1 alpha, 35kDa [Source:HGNC Symbol;Acc:3265]|ENSG00000134001|14|ENST00000256383	8	29.4233	1.20329	35.2279	0.969734	3;4;4	3;4;4	14.8064	0.774361	3;4;4	40.32	4	9	31	3.23329e+07	82.49	21.9	5	7	130.956	27.3	7	11	123.675	30.48	7	13	315	36.0894	5.08447
	ENSP00000362939	RCC1 HGNC Symbol|regulator of chromosome condensation 1 [Source:HGNC Symbol;Acc:1913]|ENSG00000180198|1|ENST00000373833	7	26.4444	1.12088	13.3957	0.969848	8;5;5	8;5;5	7.92338	0.869775	8;5;5	35.39	8	8	55	4.18833e+07	257.447	16.15	5	18	316.773	33.49	7	20	232.533	19.71	6	17	421	44.9406	7.51807
	ENSP00000361804	SPTAN1 HGNC Symbol|spectrin, alpha, non-erythrocytic 1 (alpha-fodrin) [Source:HGNC Symbol;Acc:11273]|ENSG00000197694|9|ENST00000372719	1		0.941781		0.970912	1;-;-	1;-;-		1.05967	1;-;-	50.77	2	93	1176	1.13675e+08	4852.22	49.02	90	377	5485.4	49.06	89	417	5519.01	49.59	88	382	2452	281.973	5.33838
	ENSP00000362548	AK2 HGNC Symbol|adenylate kinase 2 [Source:HGNC Symbol;Acc:362]|ENSG00000004455|1|ENST00000373449	8		1.01658	4.77442	0.971032	-;5;6	-;5;6	9.92573	0.932353	-;5;6	43.53	7	8	24	6.72653e+07					169.589	38.36	6	11	140.986	43.53	8	13	232	25.5983	7.88428
	ENSP00000293379	ITGA5 HGNC Symbol|integrin, alpha 5 (fibronectin receptor, alpha polypeptide) [Source:HGNC Symbol;Acc:6141]|ENSG00000161638|12|ENST00000293379	19	22.2683	0.833946	34.9657	0.971141	3;10;7	3;10;7	18.6471	1.05598	3;10;7	29.36	2	19	160	1.96728e+08	547.658	19.92	13	39	1081.36	29.36	19	66	814.531	24.69	17	55	1049	114.465	5.77002
	ENSP00000296490	WDR82 HGNC Symbol|WD repeat domain 82 [Source:HGNC Symbol;Acc:28826]|ENSG00000164091|3|ENST00000296490	4		0.926891	16.675	0.971554	-;2;1	-;2;1	31.3275	1.03731	-;2;1	20.77	21	5	17	1.39291e+07					58.67	18.85	4	10	54.18	9.9	3	7	313	35.0565	7.69385
	ENSP00000445065	HSPA9 HGNC Symbol|heat shock 70kDa protein 9 (mortalin) [Source:HGNC Symbol;Acc:5244]|ENSG00000113013|5|ENST00000540484	17	10.5463	1.03275	7.83002	0.973079	36;35;43	36;35;43	8.08023	0.857263	36;35;43	44.96	6	20	317	1.994e+08	1969.22	39.4	17	95	2042.77	39.25	16	98	2272.5	44.21	18	124	665	72.3561	5.93506
	ENSP00000300161	YWHAB HGNC (curated)|14-3-3 protein beta/alpha (Protein kinase C inhibitor protein 1)(KCIP-1)(Protein 1054) [Contains 14-3-3 protein beta/alpha, N-terminally processed] [Source:UniProtKB/Swiss-Prot;Acc:P31946]|20|ENSG00000166913|ENST00000353703	5	33.7936	1.02864	44.9859	0.973959	5;5;8	5;5;8	17.1908	0.914809	5;5;8	39.43	3	6	78	1.26366e+08	350.826	10.16	2	16	565.693	39.43	5	28	833.466	31.3	5	34	246	28.0648	4.83057
	ENSP00000370746	SNRPB HGNC Symbol|small nuclear ribonucleoprotein polypeptides B and B1 [Source:HGNC Symbol;Acc:11153]|ENSG00000125835|20|ENST00000381342	5	20.6887	1.06357	2.74416	0.974069	2;5;8	2;5;8	4.73023	0.852554	2;5;8	22.51	5	5	58	6.42501e+07	152.301	15.58	3	8	313.568	22.51	5	25	302.129	22.51	5	25	231	23.6402	10.9019
	ENSP00000301585	ICT1 HGNC Symbol|immature colon carcinoma transcript 1 [Source:HGNC Symbol;Acc:5359]|ENSG00000167862|17|ENST00000301585	4		1.36792	1.68096	0.974131	-;1;1	-;1;1	19.7947	0.703114	-;1;1	20.87	1	4	9	1.0796e+07					36.4033	20.87	4	5	48.63	14.56	3	4	206	23.6154	10.0669
	ENSP00000273130	DYNC1LI1 HGNC Symbol|dynein, cytoplasmic 1, light intermediate chain 1 [Source:HGNC Symbol;Acc:18745]|3|ENSG00000144635|ENST00000273130	3	30.4721	0.999972		0.974667	2;-;1	2;-;1	10.9069	0.981703	2;-;1	11.66	3	4	8	9.32536e+06	62.4533	10.52	3	4	57.07	4.78	2	2	35.06	8.22	2	2	523	56.544	6.41748
	ENSP00000455348	NDUFB10 HGNC Symbol|NADH dehydrogenase (ubiquinone) 1 beta subcomplex, 10, 22kDa [Source:HGNC Symbol;Acc:7696]|16|ENSG00000140990|ENST00000569148	3		0.868218	6.01823	0.974839	-;2;2	-;2;2	9.89079	1.09303	-;2;2	18.01	2	3	9	1.1531e+07					52.91	18.01	3	5	75.04	18.01	3	4	161	19.2456	8.70459
	ENSP00000448795	HNRNPA1 HGNC Symbol|heterogeneous nuclear ribonucleoprotein A1 [Source:HGNC Symbol;Acc:5031]|12|ENSG00000135486|ENST00000547617	12	17.511	1.16261	17.1163	0.975313	42;41;38	42;41;38	6.74502	0.861325	42;41;38	70.07	17	14	468	4.03762e+08	3011.18	65.79	11	134	3505.75	66.12	13	163	3561.2	70.07	13	171	304	32.6597	9.43701
	ENSP00000439995	SUCLG2 HGNC Symbol|succinate-CoA ligase, GDP-forming, beta subunit [Source:HGNC Symbol;Acc:11450]|ENSG00000172340|3|ENST00000541608	4	17.2565	1.06564	14.3302	0.976437	2;1;2	2;1;2	25.8423	0.925657	2;1;2	21.6	5	4	11	1.53465e+07	90.9139	15.2	3	5	53.82	10.8	2	2	55.4627	17.6	3	4	250	26.5722	8.22119
	ENSP00000362649	HDAC1 HGNC Symbol|histone deacetylase 1 [Source:HGNC Symbol;Acc:4852]|ENSG00000116478|1|ENST00000373548	2	52.6257	1.3364	40.3242	0.976623	1;1;2	1;1;2	11.198	0.746756	1;1;2	15.56	3	6	35	2.84459e+07	160.215	15.56	6	13	125.37	11.41	5	11	105.13	15.56	6	11	482	55.0677	5.47803
	ENSP00000258729	IGF2BP3 HGNC Symbol|insulin-like growth factor 2 mRNA binding protein 3 [Source:HGNC Symbol;Acc:28868]|ENSG00000136231|7|ENST00000258729	8	9.12236	1.07643	6.60177	0.977325	9;9;11	9;9;11	9.41471	0.926532	9;9;11	36.27	1	12	217	7.3382e+07	478.676	24.18	9	61	359.965	29.02	10	70	658.115	31.43	11	86	579	63.6656	8.86572
	ENSP00000357113	IFI16 HGNC Symbol|interferon, gamma-inducible protein 16 [Source:HGNC Symbol;Acc:5395]|1|ENSG00000163565|ENST00000368131	12	35.5654	1.10457	31.872	0.977888	12;12;12	12;12;12	1.8183	0.879851	12;12;12	38	9	12	75	5.78537e+07	369.98	22.36	8	24	320.82	27.43	9	24	298.93	28.53	9	27	729	82.0435	9.31982
	ENSP00000309503	YWHAZ HGNC (curated)|14-3-3 protein zeta/delta (Protein kinase C inhibitor protein 1)(KCIP-1) [Source:UniProtKB/Swiss-Prot;Acc:P63104]|8|ENSG00000164924|ENST00000353245	6	23.4891	0.947056	27.4287	0.977907	8;10;14	8;10;14	15.2614	1.03276	8;10;14	51.43	11	7	136	1.87331e+08	368.894	30.2	3	21	852.545	40.82	5	48	1206.19	44.08	6	67	245	27.7277	4.79248
	ENSP00000310723	DDX23 HGNC Symbol|DEAD (Asp-Glu-Ala-Asp) box polypeptide 23 [Source:HGNC Symbol;Acc:17347]|ENSG00000174243|12|ENST00000308025	8	32.4256	0.948986	42.7069	0.978163	4;5;3	4;5;3	12.2851	0.993133	4;5;3	14.02	1	9	53	1.39726e+07	218.782	11.59	7	17	212.11	11.22	7	17	191.368	13.05	8	19	820	95.5239	9.5542
	ENSP00000444939	FCF1 HGNC Symbol|FCF1 small subunit (SSU) processome component homolog (S. cerevisiae) [Source:HGNC Symbol;Acc:20220]|14|ENSG00000119616|ENST00000534938	2		1.45861		0.978997	-;1;-	-;1;-		0.649805	-;1;-	14.52	7	3	11	4.75556e+06					26.15	14.52	3	7	23.66	5.38	2	4	186	21.9334	9.48096
	ENSP00000456349	NPTN HGNC Symbol|neuroplastin [Source:HGNC Symbol;Acc:17867]|15|ENSG00000156642|ENST00000562924	2		0.909071	1.61191	0.979363	-;1;2	-;1;2	5.76709	1.04196	-;1;2	5.4	8	2	8	1.01617e+07	62.97	3.6	1	1	51.46	5.4	2	3	53.22	5.4	2	4	278	30.8157	7.84033
	ENSP00000322439	TUFM HGNC Symbol|Tu translation elongation factor, mitochondrial [Source:HGNC Symbol;Acc:12420]|ENSG00000178952|16|ENST00000313511	13	14.9503	1.05406	12.6547	0.979591	28;24;25	28;24;25	10.9711	0.930428	28;24;25	51.21	1	13	210	1.65063e+08	1158.27	51.21	13	71	937.699	35.38	10	70	1036.32	46.37	12	69	455	49.8433	7.60596
	ENSP00000320516	EHD1 HGNC Symbol|EH-domain containing 1 [Source:HGNC Symbol;Acc:3242]|ENSG00000110047|11|ENST00000320631	14	17.0948	0.638265	20.3234	0.979906	10;9;9	10;9;9	25.5934	1.54261	10;9;9	46.63	8	15	153	1.20913e+08	526.574	46.63	15	45	448.956	42.88	14	45	1136.61	46.63	15	63	534	60.5887	6.82959
	ENSP00000372897	AL844216.1 Clone-based (Ensembl)|Chloride intracellular channel protein 1 [Source:UniProtKB/Swiss-Prot;Acc:O00299]|ENSG00000206394|HSCHR6_MHC_QBL|ENST00000383405	4		0.930869	9.99524	0.980009	-;2;4	-;2;4	21.2285	0.994514	-;2;4	31.54	1	4	40	1.4013e+08	74.11	3.32	1	4	146.04	31.54	4	16	311.003	31.54	4	20	241	26.9057	5.17334
	ENSP00000357838	OAT HGNC Symbol|ornithine aminotransferase [Source:HGNC Symbol;Acc:8091]|ENSG00000065154|10|ENST00000368845	3	25.1243	1.42224	41.9719	0.9801	1;1;-	1;1;-		0.67019	1;1;-	14.58	2	4	5	1.34211e+07	36.28	3.42	1	2	50.8	11.16	3	3					439	48.5042	7.03467
	ENSP00000282050	ATP5A1 HGNC (curated)|ATP synthase subunit alpha, mitochondrial Precursor [Source:UniProtKB/Swiss-Prot;Acc:P25705]|18|ENSG00000152234|ENST00000282050	20	12.9895	1.17488	3.05135	0.981323	69;75;78	69;75;78	13.1334	0.813499	69;75;78	58.23	2	21	748	7.4298e+08	4576.85	58.23	21	227	4884.64	58.05	20	253	5052.53	58.23	21	268	553	59.7136	9.12939
	ENSP00000196061	PLOD1 HGNC Symbol|procollagen-lysine 1, 2-oxoglutarate 5-dioxygenase 1 [Source:HGNC Symbol;Acc:9081]|ENSG00000083444|1|ENST00000196061	25	42.9089	1.11299	42.5824	0.981475	24;18;19	24;18;19	9.64941	0.881822	24;18;19	49.93	6	25	259	1.00106e+08	1715.33	45.8	24	85	1418.43	43.88	23	86	1718.1	41.68	22	88	727	83.4974	6.94678
	ENSP00000428703	MTDH HGNC Symbol|metadherin [Source:HGNC Symbol;Acc:29608]|ENSG00000147649|8|ENST00000522313	3		0.743017	11.8036	0.98345	-;2;1	-;2;1	24.9728	1.30066	-;2;1	23.66	3	4	24	2.70364e+07	101.55	11.61	2	7	148.946	19.64	3	9	156.674	23.66	4	8	224	24.5016	9.75928
	ENSP00000266544	NDUFA9 HGNC Symbol|NADH dehydrogenase (ubiquinone) 1 alpha subcomplex, 9, 39kDa [Source:HGNC Symbol;Acc:7693]|ENSG00000139180|12|ENST00000266544	3		0.930539	1.41232	0.983731	-;1;1	-;1;1	13.7284	1.02983	-;1;1	7.96	2	3	9	7.26954e+06	47.64	2.65	1	1	78.6	5.31	2	4	90.23	5.31	2	4	377	42.4826	9.80322
	ENSP00000300291	NUDT21 HGNC Symbol|nudix (nucleoside diphosphate linked moiety X)-type motif 21 [Source:HGNC Symbol;Acc:13870]|ENSG00000167005|16|ENST00000300291	7		1.0076	6.83392	0.984241	-;7;6	-;7;6	6.74481	0.935065	-;7;6	52.42	4	7	54	5.20595e+07	59.5233	16.74	4	8	256.904	52.42	7	26	208.914	52.42	7	20	227	26.2107	8.82178
	ENSP00000431872	TPT1 HGNC Symbol|tumor protein, translationally-controlled 1 [Source:HGNC Symbol;Acc:12022]|ENSG00000133112|13|ENST00000530705	1		1.47815	8.4361	0.985465	-;1;1	-;1;1	21.402	0.653349	-;1;1	9.3	2	1	5	7.65051e+07					30.1	9.3	1	2	47.11	9.3	1	3	172	19.5826	4.93213
	ENSP00000378336	MAP2K2 HGNC Symbol|mitogen-activated protein kinase kinase 2 [Source:HGNC Symbol;Acc:6842]|ENSG00000126934|19|ENST00000394867	2		0.975448		0.985803	-;2;-	-;2;-		0.978424	-;2;-	7.92	3	2	3	1.29792e+07					29.5352	7.92	2	3					303	33.8594	6.80029
	ENSP00000377466	CNP HGNC Symbol|2',3'-cyclic nucleotide 3' phosphodiesterase [Source:HGNC Symbol;Acc:2158]|ENSG00000173786|17|ENST00000393888	5		1.21832		0.985983	-;1;-	-;1;-		0.783516	-;1;-	16.46	4	5	6	4.70609e+06	42.6	2.24	1	1	47.6367	14.21	4	5					401	45.0703	8.52881
	ENSP00000341289	TUBB2C HGNC (curated)|Tubulin beta-2C chain (Tubulin beta-2 chain) [Source:UniProtKB/Swiss-Prot;Acc:P68371]|9|ENSG00000188229|ENST00000340384	1	45.9467	1.32178	36.6725	0.986434	6;8;8	6;8;8	15.6961	0.761853	6;8;8	63.37	7	15	542	1.35057e+09	3102.09	63.37	15	161	3355	63.37	14	180	4095.14	63.37	15	201	445	49.799	4.89404
	ENSP00000261396	NUP133 HGNC Symbol|nucleoporin 133kDa [Source:HGNC Symbol;Acc:18016]|1|ENSG00000069248|ENST00000261396	5	29.047	1.01757	25.3806	0.98656	1;1;-	1;1;-		0.972196	1;1;-	6.31	4	5	22	1.21618e+07	94.7667	5.1	4	9	41.2167	3.72	3	7	40.31	3.2	3	6	1156	128.898	5.09717
	ENSP00000406709	PML HGNC Symbol|promyelocytic leukemia [Source:HGNC Symbol;Acc:9113]|ENSG00000140464|15|ENST00000418568	28	65.184	0.950511	62.699	0.986708	17;12;13	17;12;13	1.61396	1.10051	17;12;13	41.04	22	29	267	7.75669e+07	1113.26	40.46	28	95	1115.32	29.02	24	83	1369.54	37.57	24	89	865	95.6169	6.16357
	ENSP00000390225	HLA-A HGNC (curated)|Major histocompatibility complex, class I, A Fragment [Source:UniProtKB/TrEMBL;Acc:B0UZQ4]|HSCHR6_MHC_MCF|ENSG00000227715|ENST00000413609	9	10.9501	0.697256	3.4463	0.986834	5;5;9	5;5;9	14.4817	1.37158	5;5;9	49.16	62	12	107	4.84393e+07	431.695	39.8	10	27	422.881	46.15	11	36	526.542	46.15	11	44	299	34.2457	6.7124
	ENSP00000334983	PKM2 HGNC (automatic)|Pyruvate kinase isozymes M1/M2 (EC 2.7.1.40)(Pyruvate kinase muscle isozyme)(Pyruvate kinase 2/3)(Cytosolic thyroid hormone-binding protein)(CTHBP)(THBP1)(p58)(M2-PK)(Tumor M2-PK) [Source:UniProtKB/Swiss-Prot;Acc:P14618]|15|ENSG00000067225|ENST00000335181	21	29.3575	0.937853	24.493	0.986911	65;83;74	65;83;74	20.3443	1.02443	66;83;74	70.06	15	21	700	5.15776e+08	4272.96	70.06	21	204	5002.26	70.06	21	252	6029.26	63.28	20	244	531	57.9	7.84033
	ENSP00000367265	CKAP4 HGNC (automatic)|Cytoskeleton-associated protein 4 (63 kDa membrane protein)(p63) [Source:UniProtKB/Swiss-Prot;Acc:Q07065]|12|ENSG00000136026|ENST00000378026	24	13.8318	0.891383	11.5736	0.987237	51;55;63	51;56;63	9.56631	1.02215	51;55;63	60.8	12	26	619	2.60442e+08	4229.02	60.8	25	192	4249.7	57.14	25	209	4949.26	57.81	25	218	602	65.9827	5.92236
	ENSP00000233084	DDX1 HGNC Symbol|DEAD (Asp-Glu-Ala-Asp) box polypeptide 1 [Source:HGNC Symbol;Acc:2734]|ENSG00000079785|2|ENST00000233084	18	4.5809	1.01152	5.66569	0.988614	23;22;26	23;22;26	0.65804	0.934913	23;22;26	40.41	2	18	195	5.51302e+07	1007	37.84	17	63	987.336	31.49	14	57	1142.31	39.46	17	75	740	82.3798	7.2251
	ENSP00000360671	SLC25A5 HGNC (curated)|ADP/ATP translocase 2 (Adenine nucleotide translocator 2)(ANT 2)(ADP,ATP carrier protein 2)(Solute carrier family 25 member 5)(ADP,ATP carrier protein, fibroblast isoform) [Source:UniProtKB/Swiss-Prot;Acc:P05141]|X|ENSG00000005022|ENST00000317881	4	17.8502	1.12049	19.72	0.988891	5;7;6	5;7;6	13.4027	0.915139	5;7;6	43.29	2	9	115	3.19826e+08	727.231	43.29	9	37	933.632	34.56	8	40	766.388	34.56	8	38	298	32.8312	9.68604
	ENSP00000318861	SF3B2 HGNC Symbol|splicing factor 3b, subunit 2, 145kDa [Source:HGNC Symbol;Acc:10769]|ENSG00000087365|11|ENST00000322535	19	52.0496	0.877709	38.3485	0.988957	3;11;8	3;11;8	10.4628	1.05723	3;11;8	36.2	9	19	94	2.79111e+07	173.716	7.71	6	13	398.714	30.28	17	41	469.292	31.51	17	40	895	100.165	5.66846
	ENSP00000410826	ANXA11 HGNC (curated)|Annexin A11 (Annexin-11)(Annexin XI)(Calcyclin-associated annexin 50)(CAP-50)(56 kDa autoantigen) [Source:UniProtKB/Swiss-Prot;Acc:P50995]|10|ENSG00000122359|ENST00000424188	13	55.9081	0.936572	40.8844	0.988972	11;10;10	11;10;10	5.06079	1.15191	11;10;10	41.75	6	14	198	2.91449e+08	606.148	36.17	13	60	713.755	39.81	13	70	780.162	39.81	13	68	412	45.6993	8.45557
	ENSP00000387654	PCYOX1 HGNC Symbol|prenylcysteine oxidase 1 [Source:HGNC Symbol;Acc:20588]|2|ENSG00000116005|ENST00000433351	4		1.15867		0.990288	1;-;-	1;-;-		0.878502	1;-;-	15.84	7	4	7	1.48276e+07	65	15.84	4	5	45.81	4.36	2	2					505	56.6037	6.17627
	ENSP00000265112	TARS HGNC Symbol|threonyl-tRNA synthetase [Source:HGNC Symbol;Acc:11572]|ENSG00000113407|5|ENST00000265112	9	39.1418	0.806555	26.17	0.990676	3;2;2	3;2;2	29.9751	1.14477	3;2;2	13	7	10	41	2.24341e+07	142.074	11.2	9	13	197.937	9.82	6	9	234.034	10.24	8	19	723	83.3819	6.66846
	ENSP00000260443	RSL24D1 HGNC Symbol|ribosomal L24 domain containing 1 [Source:HGNC Symbol;Acc:18479]|ENSG00000137876|15|ENST00000260443	2		1.05262		0.99137	-;-;1	-;-;1		0.907921	-;-;1	18.4	3	2	3	2.09684e+06									60.89	18.4	2	3	163	19.6083	9.979
	ENSP00000379779	SNX6 HGNC Symbol|sorting nexin 6 [Source:HGNC Symbol;Acc:14970]|14|ENSG00000129515|ENST00000396526	9	18.2666	0.905619	11.6744	0.991907	7;7;4	7;7;4	10.2835	1.07927	7;7;4	32.41	9	9	58	1.2132e+07	142.204	26.21	8	22	126.975	26.21	8	17	176.473	32.41	9	19	290	33.5494	8.57275
	ENSP00000333547	RAB11B HGNC (automatic)|Ras-related protein Rab-11B (GTP-binding protein YPT3) [Source:UniProtKB/Swiss-Prot;Acc:Q15907]|19|ENSG00000185236|ENST00000328024	1		0.837419	15.1752	0.9933	-;1;2	-;1;2	11.6906	1.1435	-;1;2	29.36	5	5	28	5.17958e+07	23.7471	15.14	3	3	221.787	29.36	5	11	236.854	29.36	5	14	218	24.4735	5.93506
	ENSP00000376017	TBCB HGNC Symbol|tubulin folding cofactor B [Source:HGNC Symbol;Acc:1989]|ENSG00000105254|19|ENST00000392178	2		1.08028	11.4547	0.993654	-;1;1	-;1;1	25.1281	0.93129	-;1;1	12.15	2	2	9	5.58343e+06					87.9	12.15	2	4	105.92	12.15	2	5	214	23.5688	7.21045
	ENSP00000384825	RTN4 HGNC Symbol|reticulon 4 [Source:HGNC Symbol;Acc:14085]|ENSG00000115310|2|ENST00000402434	6	14.6896	0.887299	15.3328	0.993948	8;11;10	8;11;10	13.8654	1.07005	8;11;10	42.03	8	6	140	5.16912e+08	371.613	26.67	4	36	513.586	32.17	5	47	411.251	36.52	5	57	345	37.1214	4.76709
	ENSP00000322909	FHL2 HGNC Symbol|four and a half LIM domains 2 [Source:HGNC Symbol;Acc:3703]|ENSG00000115641|2|ENST00000322142	5	29.2867	0.928775	26.851	0.996097	1;3;5	1;3;5	13.1677	1.10389	1;3;5	25.09	4	5	37	2.24652e+07	25.927	10.04	2	4	139.754	25.09	5	15	195.201	22.94	4	18	279	32.1706	7.54736
	ENSP00000368087	RAD50 HGNC (curated)|DNA repair protein RAD50 (hRAD50)(EC 3.6.-.-) [Source:UniProtKB/Swiss-Prot;Acc:Q92878]|5|ENSG00000113522|ENST00000378810	8	84.7183	0.710439	84.8551	0.996309	3;2;1	3;2;1	23.8465	1.2554	3;2;1	10.23	4	11	29	1.24283e+08	74.2595	6.99	7	8	39.77	6.99	8	13	27.5167	3.58	5	8	1173	138.346	6.55127
	ENSP00000223641	SEC61B HGNC (curated)|Protein transport protein Sec61 subunit beta [Source:UniProtKB/Swiss-Prot;Acc:P60468]|9|ENSG00000106803|ENST00000223641	3		1.31763		0.996355	-;-;1	-;-;1		0.728963	-;-;1	36.46	1	3	6	9.43419e+06					56.6185	20.83	2	2	74.35	36.46	3	4	96	9.9681	11.561
	ENSP00000217109	CSTF1 HGNC Symbol|cleavage stimulation factor, 3' pre-RNA, subunit 1, 50kDa [Source:HGNC Symbol;Acc:2483]|ENSG00000101138|20|ENST00000217109	7	31.3694	0.943868	3.26507	0.996818	1;2;1	1;2;1	21.803	1.09221	1;2;1	25.52	3	7	49	2.28475e+07	168.064	23.67	6	16	157.5	25.52	7	15	145.06	25.52	7	18	431	48.3267	6.58057
	ENSP00000221419	HNRNPL HGNC Symbol|heterogeneous nuclear ribonucleoprotein L [Source:HGNC Symbol;Acc:5045]|ENSG00000104824|19|ENST00000221419	8	25.8079	1.07595	20.8859	0.997435	27;28;30	27;28;30	7.34086	0.919409	27;28;30	46.69	3	15	323	1.42389e+08	1528.17	46.69	15	116	1158.31	41.26	12	101	1429.72	40.41	12	106	589	64.0924	8.22119
	ENSP00000354522	TOP1 HGNC Symbol|topoisomerase (DNA) I [Source:HGNC Symbol;Acc:11986]|ENSG00000198900|20|ENST00000361337	20	17.6889	1.05021	14.7664	0.997834	22;12;17	22;12;17	2.74565	0.92761	22;12;17	45.49	1	20	116	2.0888e+07	334.236	42.48	18	49	175.2	27.71	13	27	336.957	30.85	16	40	765	90.6689	9.30518
	ENSP00000351851	NUMA1 HGNC Symbol|nuclear mitotic apparatus protein 1 [Source:HGNC Symbol;Acc:8059]|ENSG00000137497|11|ENST00000358965	39	78.3939	0.674759	83.8406	0.997934	8;15;12	8;15;12	11.9579	1.38626	8;15;12	27.37	23	48	244	3.80179e+07	849.915	16.8	29	54	1387.99	23.51	41	92	1318.05	25.46	44	98	2101	236.372	5.79541
	ENSP00000385820	CENPP HGNC Symbol|centromere protein P [Source:HGNC Symbol;Acc:32933]|ENSG00000188312|9|ENST00000402724	1		0.953739		0.998544	-;3;-	-;3;-		1.01363	-;3;-	2.02	2	1	5	8.47742e+06					0	2.02	1	5					247	28.2986	9.05615
	ENSP00000428744	MRPS28 HGNC Symbol|mitochondrial ribosomal protein S28 [Source:HGNC Symbol;Acc:14513]|ENSG00000147586|8|ENST00000519120	2		1.44494	12.1523	0.999809	-;1;1	-;1;1	20.0713	0.673807	-;1;1	22.33	6	2	4	7.18215e+06					59.89	22.33	2	2	62.02	22.33	2	2	103	11.7401	8.04541
	ENSP00000305958	STIP1 HGNC Symbol|stress-induced-phosphoprotein 1 [Source:HGNC Symbol;Acc:11387]|ENSG00000168439|11|ENST00000305218	15	28.5432	1.08146	35.5131	1.00065	3;16;25	3;16;25	11.431	0.92123	3;16;25	40.33	6	15	117	2.85956e+07	72.9	11.97	6	10	361.536	36.65	13	32	566.529	40.33	15	75	543	62.5994	6.80029
	ENSP00000437482	FKBP5 HGNC Symbol|FK506 binding protein 5 [Source:HGNC Symbol;Acc:3721]|ENSG00000096060|6|ENST00000543400	3	20.2594	0.917386	27.9805	1.00158	1;1;2	1;1;2	24.6471	1.08358	1;1;2	16.43	5	3	14	1.22006e+07	127.29	5	1	4	126.3	12.62	2	4	104.78	16.43	3	6	420	47.2725	5.87158
	ENSP00000296511	ANXA5 HGNC Symbol|annexin A5 [Source:HGNC Symbol;Acc:543]|ENSG00000164111|4|ENST00000296511	14	16.771	0.999985	7.17651	1.00192	35;43;50	35;43;50	6.94175	0.989763	35;43;50	79.38	6	15	381	1.07296e+09	2310.69	64.06	12	97	2323.11	79.38	15	124	3692.8	73.75	13	160	320	35.9144	5.04639
	ENSP00000266079	PRPF6 HGNC Symbol|PRP6 pre-mRNA processing factor 6 homolog (S. cerevisiae) [Source:HGNC Symbol;Acc:15860]|ENSG00000101161|20|ENST00000266079	20	39.8553	0.942708	31.0918	1.00221	9;9;11	9;9;11	6.92951	1.0469	9;9;11	22.95	5	22	124	1.78051e+07	429.235	18.28	18	45	287.961	18.38	17	37	451.203	20.83	19	42	941	106.858	8.25049
	ENSP00000246957	TRAP1 HGNC (curated)|Heat shock protein 75 kDa, mitochondrial Precursor (HSP 75)(Tumor necrosis factor type 1 receptor-associated protein)(TRAP-1)(TNFR-associated protein 1) [Source:UniProtKB/Swiss-Prot;Acc:Q12931]|16|ENSG00000126602|ENST00000246957	18	18.9317	1.15638	20.3677	1.0024	19;14;14	19;14;14	11.0983	0.82747	19;14;14	37.78	2	21	168	3.95136e+08	1119.62	34.09	18	58	950.765	32.1	18	59	953.454	30.4	17	51	704	80.0597	8.20654
	ENSP00000444042	RAN HGNC Symbol|RAN, member RAS oncogene family [Source:HGNC Symbol;Acc:9846]|ENSG00000132341|12|ENST00000535090	5	30.0128	1.1593	28.2111	1.00279	14;18;30	14;18;30	16.0976	0.857594	14;18;30	43.72	6	5	124	1.07898e+08	302.27	43.72	5	29	492.781	33.67	4	36	960.97	43.72	5	59	199	22.5207	8.73389
	ENSP00000338191	SNTB2 HGNC (curated)|Beta-2-syntrophin (59 kDa dystrophin-associated protein A1 basic component 2)(Syntrophin-3)(SNT3)(Syntrophin-like)(SNTL) [Source:UniProtKB/Swiss-Prot;Acc:Q13425]|16|ENSG00000168807|ENST00000336278	9		0.7709	3.00648	1.00285	-;2;2	-;2;2	7.54732	1.26157	-;2;2	25.56	4	10	34	1.75507e+07	64.83	7.59	3	4	208.16	25.56	10	15	291.712	22.96	9	15	540	57.913	8.82178
	ENSP00000357521	TPM3 HGNC Symbol|tropomyosin 3 [Source:HGNC Symbol;Acc:12012]|ENSG00000143549|1|ENST00000368533	10		1.06274	9.51181	1.00306	-;5;12	-;5;12	8.51016	0.952941	-;5;12	70.97	16	17	161	9.08068e+07	29.04	10.48	2	3	810.683	64.92	14	67	1228.19	70.97	17	91	248	29.0147	4.77979
	ENSP00000256216	HSD17B4 HGNC Symbol|hydroxysteroid (17-beta) dehydrogenase 4 [Source:HGNC Symbol;Acc:5213]|ENSG00000133835|5|ENST00000256216	10	7.48111	1.06335	7.84658	1.00361	2;3;5	2;3;5	7.83066	0.88045	2;3;5	14.81	8	10	79	3.38177e+07	411.57	11.82	8	22	531.582	11.82	8	27	494.527	14.81	10	30	736	79.6363	8.83643
	ENSP00000338568	ATP5C1 HGNC (curated)|ATP synthase subunit gamma, mitochondrial Precursor (F-ATPase gamma subunit) [Source:UniProtKB/Swiss-Prot;Acc:P36542]|10|ENSG00000165629|ENST00000335698	6	19.228	1.26264	8.67655	1.00378	4;7;8	4;7;8	11.2944	0.863292	4;7;8	37.04	3	7	42	5.49531e+07	59.54	14.81	3	8	242.82	36.03	6	15	286.33	27.27	5	19	297	32.8602	9.30518
	ENSP00000445185	ARHGDIB HGNC Symbol|Rho GDP dissociation inhibitor (GDI) beta [Source:HGNC Symbol;Acc:679]|ENSG00000111348|12|ENST00000536592	3	25.2283	0.99936	17.2	1.00397	3;4;6	3;4;6	21.4679	1.02301	3;4;6	31.28	3	3	21	2.09348e+07	21.89	11.79	2	3	78.41	11.79	2	5	121.097	31.28	3	13	195	22.3693	5.19873
	ENSP00000441875	PHB2 HGNC Symbol|prohibitin 2 [Source:HGNC Symbol;Acc:30306]|ENSG00000215021|12|ENST00000535923	18	9.02926	1.1968	1.25638	1.00434	25;25;29	25;25;29	7.51544	0.817285	25;25;29	88.96	10	18	283	2.95263e+08	1720.92	75.25	16	90	2142.54	88.96	18	91	2319.58	80.27	17	102	299	33.2759	9.83252
	ENSP00000355518	FH HGNC Symbol|fumarate hydratase [Source:HGNC Symbol;Acc:3700]|ENSG00000091483|1|ENST00000366560	7	11.0545	1.00519	9.43394	1.00459	13;9;11	13;9;11	10.1027	0.953864	13;9;11	21.57	1	7	84	6.32482e+07	788.819	21.57	7	32	691.256	21.57	7	27	654.127	21.57	7	25	510	54.6022	8.76318
	ENSP00000262030	ATP5B HGNC (automatic)|ATP synthase subunit beta, mitochondrial Precursor (EC 3.6.3.14) [Source:UniProtKB/Swiss-Prot;Acc:P06576]|12|ENSG00000110955|ENST00000262030	12	14.6381	1.17072	4.53456	1.00489	11;10;9	11;10;9	16.1265	0.837833	11;10;9	51.8	7	13	362	1.11266e+09	3160.43	44.61	12	117	3349.94	51.8	13	121	3432.78	44.61	12	124	529	56.5246	5.40186
	ENSP00000306397	UQCRFS1 HGNC Symbol|ubiquinol-cytochrome c reductase, Rieske iron-sulfur polypeptide 1 [Source:HGNC Symbol;Acc:12587]|ENSG00000169021|19|ENST00000304863	5		1.10549	4.63048	1.00507	-;4;4	-;4;4	26.3913	0.921168	-;4;4	18.25	1	5	14	8.28177e+06					105.413	18.25	5	8	56.21	16.06	4	6	274	29.6494	8.32373
	ENSP00000336741	DHX15 HGNC Symbol|DEAH (Asp-Glu-Ala-His) box polypeptide 15 [Source:HGNC Symbol;Acc:2738]|ENSG00000109606|4|ENST00000336812	21	33.0681	0.951558	28.4651	1.00631	21;16;16	21;16;16	8.00335	0.968297	21;16;16	34.21	3	23	206	6.96573e+07	657.909	30.94	20	70	582.398	32.08	20	67	670.236	27.92	18	69	795	90.8752	7.45947
	ENSP00000344832	CAP1 HGNC Symbol|CAP, adenylate cyclase-associated protein 1 (yeast) [Source:HGNC Symbol;Acc:20040]|ENSG00000131236|1|ENST00000340450	5	34.709	0.893324	23.8056	1.00642	9;8;7	9;8;7	17.3912	1.21169	9;8;7	20.89	13	6	104	4.56856e+07	423.783	10.97	4	31	488.631	10.13	3	35	681.08	20.04	5	38	474	51.7977	8.06006
	ENSP00000227524	PRPF19 HGNC Symbol|PRP19/PSO4 pre-mRNA processing factor 19 homolog (S. cerevisiae) [Source:HGNC Symbol;Acc:17896]|ENSG00000110107|11|ENST00000227524	6	31.1487	1.09431	19.9316	1.00664	10;9;9	10;9;9	12.4543	0.906866	10;10;9	20.44	5	6	111	8.54155e+07	645.077	12.5	5	37	577.233	12.5	5	36	661.987	20.44	6	38	504	55.1463	6.60986
	ENSP00000318115	TIMM50 HGNC Symbol|translocase of inner mitochondrial membrane 50 homolog (S. cerevisiae) [Source:HGNC Symbol;Acc:23656]|ENSG00000105197|19|ENST00000314349	3		1.12401	6.56581	1.00744	-;2;2	-;2;2	9.78926	0.872632	-;2;2	8.33	2	3	8	1.32395e+07					76.13	8.33	3	4	64.86	8.33	3	4	456	50.4331	9.42236
	ENSP00000362411	FAM129B HGNC Symbol|family with sequence similarity 129, member B [Source:HGNC Symbol;Acc:25282]|ENSG00000136830|9|ENST00000373314	15	41.4766	0.851508	31.3996	1.00761	11;9;12	11;9;12	23.1768	1.12501	11;9;12	29.47	3	15	103	3.62714e+07	315.639	26.6	14	35	323.092	20.05	12	30	502.422	24.15	13	38	733	82.6309	6.15088
	ENSP00000444931	EIF3F HGNC Symbol|eukaryotic translation initiation factor 3, subunit F [Source:HGNC Symbol;Acc:3275]|ENSG00000175390|11|ENST00000538607	4	18.795	0.703492	21.6147	1.00762	1;1;1	1;1;1	0.513821	1.40638	1;1;1	21.5	6	4	34	4.57098e+07	353.001	21.5	4	11	432.313	21.5	4	11	487.476	21.5	4	12	307	33.219	5.59229
	ENSP00000305699	HOOK3 HGNC Symbol|hook homolog 3 (Drosophila) [Source:HGNC Symbol;Acc:23576]|8|ENSG00000168172|ENST00000307602	3		0.62341		1.00858	-;-;1	-;-;1		1.55962	-;-;1	7.1	3	5	11	2.90554e+06	24.12	4.74	3	6					83.062	5.29	4	5	718	83.0744	5.17334
	ENSP00000387844	PRPF3 HGNC Symbol|PRP3 pre-mRNA processing factor 3 homolog (S. cerevisiae) [Source:HGNC Symbol;Acc:17348]|1|ENSG00000117360|ENST00000414970	7	50.3666	1.06632	37.964	1.00877	3;3;4	3;3;4	2.89085	1.02084	3;3;4	12.15	3	7	21	5.06945e+06	73.14	7.26	4	7	40.8046	6.94	5	6	57.4709	6.94	5	8	634	72.0312	9.65674
	ENSP00000196371	OXCT1 HGNC Symbol|3-oxoacid CoA transferase 1 [Source:HGNC Symbol;Acc:8527]|ENSG00000083720|5|ENST00000196371	7	20.7468	1.06972	30.2378	1.00879	4;4;4	4;4;4	18.5194	0.901054	4;4;4	22.12	3	7	36	1.85114e+07	164.963	14.23	6	12	122.059	18.27	6	10	244.815	18.27	6	14	520	56.1219	7.45947
	ENSP00000358313	RBM8A HGNC Symbol|RNA binding motif protein 8A [Source:HGNC Symbol;Acc:9905]|ENSG00000131795|1|ENST00000369307	2		0.839382		1.00882	-;1;-	-;1;-		1.16358	-;1;-	15.03	2	2	6	1.18418e+07					68.72	15.03	2	5	25.63	4.05	1	1	173	19.7477	5.92236
	ENSP00000305790	SF3B3 HGNC Symbol|splicing factor 3b, subunit 3, 130kDa [Source:HGNC Symbol;Acc:10770]|ENSG00000189091|16|ENST00000302516	18	22.3192	1.11372	25.8498	1.00945	4;5;6	4;5;6	8.21373	0.940839	4;5;6	23.09	2	18	75	1.04637e+08	391.693	13.39	12	22	431.705	17.58	14	24	446.524	18.57	16	29	1217	135.492	5.26221
	ENSP00000413869	PSMC4 HGNC Symbol|proteasome (prosome, macropain) 26S subunit, ATPase, 4 [Source:HGNC Symbol;Acc:9551]|ENSG00000013275|19|ENST00000455878	7	10.5879	1.08746	9.50282	1.01074	5;3;2	5;3;2	6.88068	0.950251	5;3;2	25.58	2	7	38	2.9925e+07	142.9	25.58	7	16	135.4	8.53	3	10	168.261	11.63	4	12	387	43.4805	5.26221
	ENSP00000366927	ALDH1B1 HGNC Symbol|aldehyde dehydrogenase 1 family, member B1 [Source:HGNC Symbol;Acc:407]|ENSG00000137124|9|ENST00000377698	4	32.3751	1.72257	21.8982	1.0108	2;2;1	2;2;1	41.9102	0.631848	2;2;1	9.86	2	4	16	1.05825e+07	77.43	9.86	4	5	93.42	9.86	4	6	156.73	9.86	4	5	517	57.2132	6.99072
	ENSP00000395351	SDCBP HGNC Symbol|syndecan binding protein (syntenin) [Source:HGNC Symbol;Acc:10662]|ENSG00000137575|8|ENST00000424270	5		0.822264	5.8516	1.012	-;4;7	-;4;7	4.8055	1.23832	-;4;7	16.78	6	5	30	2.23433e+07					119.94	16.78	5	13	156.651	16.78	5	17	292	31.7415	7.53271
	ENSP00000340019	HSPD1 HGNC Symbol|heat shock 60kDa protein 1 (chaperonin) [Source:HGNC Symbol;Acc:5261]|ENSG00000144381|2|ENST00000345042	11	15.5871	1.10331	19.4511	1.01394	42;44;50	42;45;50	12.6401	0.906257	42;44;50	37.87	8	12	468	3.74643e+08	2847.66	37.87	12	144	3194.25	37.87	12	155	3423.51	37.87	12	169	573	61.0164	5.87158
	ENSP00000452479	BCL2L2-PABPN1 HGNC Symbol|BCL2L2-PABPN1 readthrough [Source:HGNC Symbol;Acc:42959]|14|ENSG00000258643|ENST00000557008	2		0.871955		1.01459	-;1;-	-;1;-		1.12652	-;1;-	17.42	5	4	16	4.07871e+07					52.0933	14.11	3	6	47.58	17.42	4	10	333	37.1474	8.1333
	ENSP00000358417	PHGDH HGNC (curated)|D-3-phosphoglycerate dehydrogenase (3-PGDH)(EC 1.1.1.95) [Source:UniProtKB/Swiss-Prot;Acc:O43175]|1|ENSG00000092621|ENST00000369409	8	33.5415	1.05284	53.3446	1.01511	2;3;3	2;3;3	44.5231	0.924	2;3;3	26.64	3	8	27	2.51306e+07	114.389	18.2	6	7	181.183	23.64	7	9	283.504	26.64	8	11	533	56.6144	6.7124
	ENSP00000215754	MIF HGNC (curated)|Macrophage migration inhibitory factor (MIF)(EC 5.3.2.1)(Phenylpyruvate tautomerase)(L-dopachrome tautomerase)(EC 5.3.3.12)(L-dopachrome isomerase)(Glycosylation-inhibiting factor)(GIF) [Source:UniProtKB/Swiss-Prot;Acc:P14174]|22|ENSG00000240972|ENST00000215754	1		0.811976		1.01536	-;-;1	-;-;1		1.20548	-;-;1	11.3	1	1	2	22546048									43.57	11.3	1	2	115	12.4682	7.88428
	ENSP00000446305	NAP1L1 HGNC Symbol|nucleosome assembly protein 1-like 1 [Source:HGNC Symbol;Acc:7637]|12|ENSG00000187109|ENST00000540878	5	29.7448	1.19557	37.3453	1.01611	4;5;5	4;5;5	14.3364	0.816478	4;5;5	58.78	19	5	50	4.42728e+07	186.001	45.8	4	11	304.956	45.8	4	19	334.242	58.78	5	20	131	15.3197	4.48779
	ENSP00000273075	DNPEP HGNC Symbol|aspartyl aminopeptidase [Source:HGNC Symbol;Acc:2981]|ENSG00000123992|2|ENST00000273075	5		1.1956		1.01699	-;-;1	-;-;1		0.820001	-;-;1	20	13	6	13	6.96531e+06	68.98	10.93	3	3	38.72	16.49	5	7	59.7667	8.04	3	3	485	53.4044	7.57666
	ENSP00000319664	NUDC HGNC Symbol|nuclear distribution gene C homolog (A. nidulans) [Source:HGNC Symbol;Acc:8045]|ENSG00000090273|1|ENST00000321265	4	56.3167	1.08687		1.01713	3;-;1	3;-;1	2.34185	0.937322	3;-;1	19.94	3	4	7	1.55598e+07	121.33	19.94	4	5					54.21	9.37	2	2	331	38.2191	5.37646
	ENSP00000261401	CORO1C HGNC Symbol|coronin, actin binding protein, 1C [Source:HGNC Symbol;Acc:2254]|ENSG00000110880|12|ENST00000261401	11	0.786325	0.978868	1.00345	1.01803	27;28;30	27;28;30	6.35344	1.03368	27;28;30	31.86	12	12	251	1.47708e+08	1315.69	31.86	12	80	1394.79	31.86	12	89	1648.18	31.86	12	82	474	53.2151	7.07861
	ENSP00000322016	PUF60 HGNC Symbol|poly-U binding splicing factor 60KDa [Source:HGNC Symbol;Acc:17042]|ENSG00000179950|8|ENST00000313352	9	23.5999	1.15137	35.3706	1.0183	11;5;9	11;5;9	4.07993	1.00172	11;5;9	36.47	11	10	84	3.1552e+07	395.894	27.66	8	35	256.779	16.63	7	19	256.538	30.86	9	30	499	53.9907	5.32568
	ENSP00000225726	CCDC47 HGNC Symbol|coiled-coil domain containing 47 [Source:HGNC Symbol;Acc:24856]|ENSG00000108588|17|ENST00000225726	11	20.6663	1.01555	13.6113	1.01867	5;7;9	5;7;9	6.52441	0.93097	5;7;9	26.09	17	13	82	1.75982e+07	171.883	21.95	10	22	174.522	17.81	11	34	234.419	21.74	11	26	483	55.8383	4.86865
	ENSP00000432153	CFL1 HGNC Symbol|cofilin 1 (non-muscle) [Source:HGNC Symbol;Acc:1874]|ENSG00000172757|11|ENST00000526975	2	27.9932	1.16089	31.6168	1.01908	3;4;6	3;4;6	32.1484	0.78924	3;4;6	35.16	7	2	26	1.23091e+08	30	12.09	1	3	142.253	12.09	1	8	264.897	35.16	2	15	91	10.1742	5.57959
	ENSP00000435294	MRPL17 HGNC Symbol|mitochondrial ribosomal protein L17 [Source:HGNC Symbol;Acc:14053]|ENSG00000158042|11|ENST00000532203	7		1.16107	14.803	1.0193	-;1;2	-;1;2	35.0397	0.87988	-;1;2	51.41	3	7	16	1.62069e+07					100.261	33.8	5	7	92.0005	51.41	7	9	142	16.3608	10.4771
	ENSP00000391774	CPSF6 HGNC Symbol|cleavage and polyadenylation specific factor 6, 68kDa [Source:HGNC Symbol;Acc:13871]|ENSG00000111605|12|ENST00000435070	4	39.7011	0.958617	39.9799	1.01984	3;4;4	3;4;4	6.89866	0.997597	3;4;4	12.52	3	4	46	1.82187e+07	241.593	7.99	3	15	324.009	12.52	4	18	424.237	7.99	3	13	551	59.1734	7.15186
	ENSP00000300933	TPM4 HGNC Symbol|tropomyosin 4 [Source:HGNC Symbol;Acc:12013]|ENSG00000167460|19|ENST00000300933	6		0.776732	3.69497	1.02005	-;5;7	-;5;7	15.2977	1.29682	-;5;8	52.82	6	13	118	8.03735e+07	29.04	10.48	2	3	719.787	41.94	11	49	1033.77	50.4	12	66	248	28.5045	4.69092
	ENSP00000344581	RBM39 HGNC Symbol|RNA binding motif protein 39 [Source:HGNC Symbol;Acc:15923]|ENSG00000131051|20|ENST00000338163	10	35.1911	1.01563	28.6678	1.02027	5;5;12	5;5;12	9.8857	0.990226	5;5;12	39.72	17	11	82	3.89228e+07	403.691	28.37	9	22	411.945	33.33	9	25	508.266	31.44	10	35	423	47.9941	10.5649
	ENSP00000263556	P4HA1 HGNC Symbol|prolyl 4-hydroxylase, alpha polypeptide I [Source:HGNC Symbol;Acc:8546]|ENSG00000122884|10|ENST00000263556	2	65.4976	1.07082	65.6182	1.02031	7;3;2	7;3;2	8.81204	0.936193	7;3;2	42.32	2	15	213	5.60811e+07	1477.2	42.32	15	88	1202.49	40.82	14	64	1110.94	39.7	12	61	534	60.9289	6.01123
	ENSP00000258383	MRPL44 HGNC Symbol|mitochondrial ribosomal protein L44 [Source:HGNC Symbol;Acc:16650]|2|ENSG00000135900|ENST00000258383	2		1.06165	0.355171	1.02086	-;1;2	-;1;2	1.72013	0.929058	-;1;2	6.63	1	3	5	5.36834e+06					0	4.82	2	2	21.78	6.63	3	3	332	37.5117	8.39697
	ENSP00000362463	GLO1 HGNC Symbol|glyoxalase I [Source:HGNC Symbol;Acc:4323]|ENSG00000124767|6|ENST00000373365	1		1.26484	14.2931	1.02096	-;1;1	-;1;1	29.4867	0.79825	-;1;1	7.07	1	1	6	26089691					40.0467	7.07	1	3	37.29	7.07	1	3	184	20.7642	5.31299
	ENSP00000420366	ATP5F1 HGNC (curated)|ATP synthase subunit b, mitochondrial Precursor [Source:UniProtKB/Swiss-Prot;Acc:P24539]|1|ENSG00000116459|ENST00000483994	3	21.2034	1.50686	11.2742	1.02174	1;2;2	1;2;2	25.0518	0.691149	1;2;2	14.36	2	3	21	5.13662e+07	51.08	14.36	3	4	66.3771	14.36	3	10	88.8986	14.36	3	7	195	22.2608	9.26123
	ENSP00000341082	MRPL20 HGNC Symbol|mitochondrial ribosomal protein L20 [Source:HGNC Symbol;Acc:14478]|1|ENSG00000242485|ENST00000344843	1		1.07472	24.6297	1.02266	-;2;1	-;2;1	12.1783	0.91243	-;2;1	6.04	1	1	3	2.90962e+06					24.27	6.04	1	2	27	6.04	1	1	149	17.4316	10.8579
	ENSP00000400591	SNRPE HGNC Symbol|small nuclear ribonucleoprotein polypeptide E [Source:HGNC Symbol;Acc:11161]|ENSG00000182004|1|ENST00000414487	2	15.3771	1.1144	9.98286	1.02306	2;1;3	2;1;3	13.4999	0.914907	2;1;3	61.96	2	3	27	3.11821e+07	52.58	48.91	2	6	164.68	61.96	3	5	280.9	61.96	3	16	92	10.7966	9.43701
	ENSP00000386406	DCTN1 HGNC Symbol|dynactin 1 [Source:HGNC Symbol;Acc:2711]|ENSG00000204843|2|ENST00000409240	12	6.73999	0.833566	20.3673	1.02358	3;2;2	3;2;2	10.4368	1.20291	3;2;2	16.34	10	14	61	1.25673e+07	305.392	12.62	11	22	169.949	8.09	8	17	214.224	12.62	12	22	1236	136.735	5.40186
	ENSP00000303191	PLRG1 HGNC Symbol|pleiotropic regulator 1 [Source:HGNC Symbol;Acc:9089]|4|ENSG00000171566|ENST00000302078	6	70.1287	1.36656		1.02514	1;-;2	1;-;2	6.60854	0.742063	1;-;2	20	12	7	27	2.64717e+07	65.22	11.88	4	7	85.0057	6.34	2	7	105.99	20	7	13	505	56.2547	9.17334
	ENSP00000388475	U2AF2 HGNC Symbol|U2 small nuclear RNA auxiliary factor 2 [Source:HGNC Symbol;Acc:23156]|ENSG00000063244|19|ENST00000450554	7	40.5677	1.07887	29.9239	1.02565	16;22;17	16;22;17	11.6401	0.927483	16;22;17	20.38	2	7	103	3.10892e+07	365.691	15.07	5	32	530.499	20.38	7	40	471.851	15.07	5	31	471	53.087	9.08545
	ENSP00000310668	NUP93 HGNC Symbol|nucleoporin 93kDa [Source:HGNC Symbol;Acc:28958]|ENSG00000102900|16|ENST00000308159	14	27.3483	0.965698	17.1936	1.0258	5;2;2	5;2;2	8.57178	1.15812	5;2;2	20.76	13	17	78	2.63675e+07	408.407	19.78	15	28	308.417	16.97	12	22	404.647	18.56	14	28	819	93.4296	5.71924
	ENSP00000375816	ATP2B4 HGNC Symbol|ATPase, Ca++ transporting, plasma membrane 4 [Source:HGNC Symbol;Acc:817]|1|ENSG00000058668|ENST00000391954	4		0.800054		1.026	-;-;1	-;-;1		1.23627	-;-;1	4.85	20	6	22	5.26015e+07	52.21	2.56	3	5	79.3567	2.56	3	6	64.82	4.85	6	11	1134	125.265	7.66455
	ENSP00000366156	SRM HGNC Symbol|spermidine synthase [Source:HGNC Symbol;Acc:11296]|ENSG00000116649|1|ENST00000376957	2		2.33543		1.02635	-;1;-	-;1;-		0.425471	-;1;-	7.28	1	2	3	1.51591e+07					50.89	7.28	2	2	41.26	2.65	1	1	302	33.8027	5.49072
	ENSP00000395660	ZNF512 HGNC Symbol|zinc finger protein 512 [Source:HGNC Symbol;Acc:29380]|ENSG00000243943|2|ENST00000413371	2	40.0096	1.29116		1.02648	4;-;1	4;-;1	1.07328	0.822129	4;-;1	8.37	15	3	15	3.89697e+06	23.5367	8.37	3	10					37.47	7.35	2	5	490	56.3261	9.77393
	ENSP00000258455	MRPS9 HGNC Symbol|mitochondrial ribosomal protein S9 [Source:HGNC Symbol;Acc:14501]|ENSG00000135972|2|ENST00000258455	2		1.3189	13.5399	1.02734	-;2;1	-;2;1	15.9599	0.770116	-;2;1	9.09	1	3	12	1.56212e+07					28.21	9.09	3	6	42.03	9.09	3	6	396	45.8058	9.51025
	ENSP00000440759	VPS35 HGNC Symbol|vacuolar protein sorting 35 homolog (S. cerevisiae) [Source:HGNC Symbol;Acc:13487]|ENSG00000069329|16|ENST00000541330	13	20.183	0.878266	17.3947	1.0283	9;9;8	9;9;8	6.67017	1.1965	9;9;8	25.08	4	14	101	4.8017e+07	508.241	19.34	12	34	424.568	25.08	14	31	665.403	25.08	14	36	662	76.1639	5.42725
	ENSP00000290341	IGF2BP1 HGNC Symbol|insulin-like growth factor 2 mRNA binding protein 1 [Source:HGNC Symbol;Acc:28866]|ENSG00000159217|17|ENST00000290341	6	2.44227	1.0238	3.75002	1.02853	4;7;9	4;7;9	5.80031	0.99051	4;7;9	24.44	2	10	190	7.29436e+07	374.698	12.82	6	54	313.647	20.28	9	60	545.087	18.72	8	76	577	63.4412	9.20264
	ENSP00000285093	ACAA2 HGNC Symbol|acetyl-CoA acyltransferase 2 [Source:HGNC Symbol;Acc:83]|ENSG00000167315|18|ENST00000285093	4	27.1956	0.987405	28.4848	1.02879	3;4;3	3;4;3	6.86376	1.08941	3;4;3	15.37	1	4	24	1.38233e+07	62.6	8.31	3	6	148.519	8.31	3	9	135.33	15.37	4	9	397	41.8976	8.08936
	ENSP00000355759	PARP1 HGNC (curated)|Poly [ADP-ribose] polymerase 1 (PARP-1)(EC 2.4.2.30)(ADPRT)(NAD(+) ADP-ribosyltransferase 1)(Poly[ADP-ribose] synthetase 1) [Source:UniProtKB/Swiss-Prot;Acc:P09874]|1|ENSG00000143799|ENST00000366794	14	14.8934	1.02988	6.85222	1.02908	13;14;11	13;14;11	5.35285	1.00731	13;14;11	23.47	4	14	143	3.39102e+07	312.778	19.43	12	40	206.387	15.88	11	33	402.106	22.49	13	70	1014	113.012	8.88037
	ENSP00000221494	SF3A2 HGNC Symbol|splicing factor 3a, subunit 2, 66kDa [Source:HGNC Symbol;Acc:10766]|ENSG00000104897|19|ENST00000221494	4		1.00803	16.5562	1.0304	-;1;3	-;1;3	10.0688	1.07036	-;1;3	10.99	1	5	29	1.01757e+07	25.0867	3.23	3	8	51.3268	6.47	4	10	45.68	10.99	5	11	464	49.2243	9.64209
	ENSP00000305556	PCBP1 HGNC (curated)|Poly(rC)-binding protein 1 (Alpha-CP1)(hnRNP-E1)(Nucleic acid-binding protein SUB2.3) [Source:UniProtKB/Swiss-Prot;Acc:Q15365]|2|ENSG00000169564|ENST00000303577	5	28.3789	0.859317	20.6632	1.03071	5;10;12	5;10;12	12.4215	1.16048	5;10;12	35.96	8	7	135	1.04079e+08	562.419	35.96	7	31	1011.86	35.96	7	48	1223.62	35.96	7	56	356	37.4739	7.09326
	ENSP00000319501	UGDH HGNC Symbol|UDP-glucose 6-dehydrogenase [Source:HGNC Symbol;Acc:12525]|ENSG00000109814|4|ENST00000316423	10	32.0554	1.50245	35.7872	1.03082	1;3;3	1;3;3	19.6793	0.644159	1;3;3	40.49	9	10	36	2.69316e+07	158.73	20.85	6	9	247.327	19.23	6	12	274.801	33.4	9	15	494	54.9893	7.12256
	ENSP00000227525	TMEM109 HGNC (automatic)|Transmembrane protein 109 Precursor (Mitsugumin-23)(Mg23) [Source:UniProtKB/Swiss-Prot;Acc:Q9BVC6]|11|ENSG00000110108|ENST00000227525	5	23.2329	0.861705	43.8775	1.03177	9;7;9	9;7;9	27.8182	1.1672	9;7;9	16.46	7	5	62	9.27818e+07	367.282	16.46	4	19	435.613	16.46	5	20	446.389	16.46	5	23	243	26.1936	10.4771
	ENSP00000357244	CCT3 HGNC (curated)|T-complex protein 1 subunit gamma (TCP-1-gamma)(CCT-gamma)(hTRiC5) [Source:UniProtKB/Swiss-Prot;Acc:P49368]|1|ENSG00000163468|ENST00000368261	18	26.9578	1.25148	26.2552	1.03225	30;26;26	30;26;26	10.931	0.868429	30;26;26	42.75	8	18	217	6.7668e+07	1069.72	37.25	16	71	1152.46	37.43	17	68	1173.43	40.92	16	78	545	60.4953	6.49365
	ENSP00000391452	POLR2B HGNC Symbol|polymerase (RNA) II (DNA directed) polypeptide B, 140kDa [Source:HGNC Symbol;Acc:9188]|4|ENSG00000047315|ENST00000441246	13	37.6275	0.971615	21.9842	1.03232	4;3;4	4;3;4	15.4961	0.992049	4;3;4	15.08	3	14	50	2.88341e+07	121.621	14.05	13	22	53.5059	11.74	10	14	92.546	9.17	9	14	1167	132.971	7.15186
	ENSP00000365936	PPP1CA HGNC Symbol|protein phosphatase 1, catalytic subunit, alpha isozyme [Source:HGNC Symbol;Acc:9281]|ENSG00000172531|11|ENST00000376745	3		1.10234		1.03247	1;-;-	1;-;-		0.962724	1;-;-	30.61	13	8	52	2.38526e+07	165.34	16.06	4	12	251.683	30.61	8	19	372.579	26.06	7	21	330	37.4878	6.32861
	ENSP00000446121	LIMS1 HGNC Symbol|LIM and senescent cell antigen-like domains 1 [Source:HGNC Symbol;Acc:6616]|ENSG00000169756|2|ENST00000542845	3		0.782277		1.03268	-;-;1	-;-;1		1.27259	-;-;1	13.44	5	3	3	6822650									27.77	13.44	3	3	387	44.3604	8.01611
	ENSP00000393151	HNRNPU HGNC (curated)|Heterogeneous nuclear ribonucleoprotein U (hnRNP U)(Scaffold attachment factor A)(SAF-A)(p120)(pp120) [Source:UniProtKB/Swiss-Prot;Acc:Q00839]|1|ENSG00000153187|ENST00000444376	1	41.1486	0.978108	33.0119	1.03307	7;8;7	7;8;7	8.07098	1.06197	7;8;7	30.77	2	18	572	5.32811e+08	3773.35	30.77	18	202	3874.18	30.77	18	187	4185.15	27.92	17	183	806	88.9242	5.78271
	ENSP00000359778	ELTD1 HGNC Symbol|EGF, latrophilin and seven transmembrane domain containing 1 [Source:HGNC Symbol;Acc:20822]|ENSG00000162618|1|ENST00000370742	1		0.86224		1.03393	-;1;-	-;1;-		1.16093	-;1;-	2.03	1	1	2	1.89554e+06					41.36	2.03	1	2					690	77.7598	7.60596
	ENSP00000420839	SEPT11 HGNC Symbol|septin 11 [Source:HGNC Symbol;Acc:25589]|ENSG00000138758|4|ENST00000510641	3	18.8951	0.899057	28.1832	1.03541	2;1;3	2;1;3	14.9633	1.10846	2;1;3	33.6	10	9	72	3.9475e+07	162.07	20.43	7	26	96.3833	26.08	7	21	169.562	30.38	7	25	372	43.0859	6.30322
	ENSP00000353552	HNRNPK HGNC (curated)|Heterogeneous nuclear ribonucleoprotein K (hnRNP K)(Transformation up-regulated nuclear protein)(TUNP) [Source:UniProtKB/Swiss-Prot;Acc:P61978]|9|ENSG00000165119|ENST00000360384	18	20.5154	1.03437	16.7871	1.03602	57;63;63	57;63;63	5.9574	1.01528	57;63;63	57.45	33	18	721	377865591	3758.11	51.84	17	220	4335.24	57.45	18	250	4607.11	51.84	17	251	463	50.9444	5.5415
	ENSP00000402103	HK1 HGNC Symbol|hexokinase 1 [Source:HGNC Symbol;Acc:4922]|ENSG00000156515|10|ENST00000448642	32	22.1075	0.951151	16.2066	1.03731	53;38;49	53;38;49	6.22063	1.05987	53;38;49	53.89	12	35	415	1.04697e+08	2331.71	47.69	31	147	1838.56	46.43	31	123	2168.8	53.78	34	145	952	106.245	7.06396
	ENSP00000351777	VCP HGNC Symbol|valosin containing protein [Source:HGNC Symbol;Acc:12666]|ENSG00000165280|9|ENST00000358901	41	6.51943	1.05939	10.6374	1.03859	96;103;105	96;103;105	3.63934	0.879253	96;103;105	69.35	3	42	946	2.42997e+08	4931.61	61.29	39	296	5165.99	60.17	38	316	6225.41	69.35	40	334	806	89.2657	5.26221
	ENSP00000233616	MOGS HGNC (curated)|Mannosyl-oligosaccharide glucosidase (EC 3.2.1.106)(Processing A-glucosidase I) [Source:UniProtKB/Swiss-Prot;Acc:Q13724]|2|ENSG00000115275|ENST00000233616	22	10.7143	1.15969	5.7512	1.03885	7;4;6	7;4;6	9.44664	0.917572	7;4;6	39.9	21	24	176	5.93143e+07	808.735	37.75	23	63	668.458	33.21	21	55	765.63	34.89	21	58	837	91.8606	8.89502
	ENSP00000364320	MRTO4 HGNC Symbol|mRNA turnover 4 homolog (S. cerevisiae) [Source:HGNC Symbol;Acc:18477]|1|ENSG00000053372|ENST00000330263	2		1.10724	8.02463	1.03927	-;1;1	-;1;1	6.25134	0.910632	-;1;1	11.72	1	2	8	1.88466e+07					53.53	11.72	2	4	62.1367	11.72	2	4	239	27.5429	8.29443
	ENSP00000292147	ETHE1 HGNC Symbol|ethylmalonic encephalopathy 1 [Source:HGNC Symbol;Acc:23287]|ENSG00000105755|19|ENST00000292147	8		0.921982	7.27394	1.03983	-;1;1	-;1;1	14.893	1.10738	-;1;1	49.61	1	9	21	5.39698e+07					242.04	49.61	9	11	194.226	47.24	8	10	254	27.8551	6.82959
	ENSP00000222005	CDC37 HGNC Symbol|cell division cycle 37 homolog (S. cerevisiae) [Source:HGNC Symbol;Acc:1735]|ENSG00000105401|19|ENST00000222005	8	21.4238	1.07313	26.1615	1.04008	10;9;10	10;9;10	12.7123	0.938798	10;9;10	33.33	1	8	81	2.69808e+07	567.317	33.33	8	29	394.847	21.96	7	23	316.77	15.08	5	29	378	44.44	5.24951
	ENSP00000362576	YARS HGNC Symbol|tyrosyl-tRNA synthetase [Source:HGNC Symbol;Acc:12840]|1|ENSG00000134684|ENST00000373477	6	53.251	0.903794	49.9479	1.04023	3;2;3	3;2;3	19.2031	1.13845	3;2;3	24.05	1	6	21	1.67085e+07	72.2133	20.64	5	6	78.37	12.31	3	5	66.2233	24.05	6	10	528	59.1061	7.04932
	ENSP00000302919	SMARCC2 HGNC Symbol|SWI/SNF related, matrix associated, actin dependent regulator of chromatin, subfamily c, member 2 [Source:HGNC Symbol;Acc:11105]|ENSG00000139613|12|ENST00000347471	7	74.4415	1.03295	55.887	1.04072	4;1;-	4;1;-		1.10556	4;1;-	13.54	4	12	57	3.341e+07	340.785	10.71	10	23	247.795	10.44	9	18	305.895	8.58	8	16	1130	124.764	5.5542
	ENSP00000312250	ADPGK HGNC Symbol|ADP-dependent glucokinase [Source:HGNC Symbol;Acc:25250]|ENSG00000159322|15|ENST00000311669	7	75.951	2.58817	29.5721	1.04147	1;1;-	1;1;-		0.615156	1;1;-	27.22	8	7	24	1.26351e+07	241.341	9.07	3	8	189.307	19.15	5	8	259.415	24.4	6	8	496	53.9266	6.20166
	ENSP00000346550	ANXA6 HGNC (automatic)|Annexin A6 (Annexin-6)(Annexin VI)(Lipocortin VI)(p68)(p70)(Protein III)(Chromobindin-20)(67 kDa calelectrin)(Calphobindin-II)(CPB-II) [Source:UniProtKB/Swiss-Prot;Acc:P08133]|5|ENSG00000197043|ENST00000354546	10	15.7287	0.970324	10.1383	1.04164	21;17;20	21;17;20	8.97717	1.06375	21;17;20	63.3	10	29	807	4.34883e+08	3552.76	51.86	27	235	3344.88	56.02	27	286	3624.23	63.3	29	286	673	75.8256	5.60498
	ENSP00000367872	GNB1 HGNC Symbol|guanine nucleotide binding protein (G protein), beta polypeptide 1 [Source:HGNC Symbol;Acc:4396]|ENSG00000078369|1|ENST00000378609	7	19.8187	1.17215	28.0859	1.04169	12;8;7	12;8;7	10.8372	0.820303	12;8;7	68.53	9	12	194	1.82917e+08	1061.58	65.29	11	58	1019.13	65.29	11	64	1362.79	68.53	12	72	340	37.353	5.99854
	ENSP00000385873	EFTUD2 HGNC Symbol|elongation factor Tu GTP binding domain containing 2 [Source:HGNC Symbol;Acc:30858]|ENSG00000108883|17|ENST00000402521	17	30.33	1.036	22.2638	1.04219	20;16;15	20;16;15	4.35732	0.955977	20;16;15	35.22	3	18	158	9.513e+07	574.567	29.46	16	60	324.913	27.53	15	50	497.086	24.01	13	48	937	105.317	5.22412
	ENSP00000261772	AARS HGNC Symbol|alanyl-tRNA synthetase [Source:HGNC Symbol;Acc:20]|ENSG00000090861|16|ENST00000261772	8	47.8969	1.06989	39.2395	1.04231	3;4;3	3;4;3	22.5334	1.02614	3;4;3	12.91	2	9	43	2.0585e+07	122.684	10.43	7	12	141.657	11.36	8	13	147.53	11.47	7	18	968	106.743	5.52881
	ENSP00000406103	NUP54 HGNC Symbol|nucleoporin 54kDa [Source:HGNC Symbol;Acc:17359]|ENSG00000138750|4|ENST00000458189	6	32.3416	0.989927	29.201	1.04301	4;3;3	4;3;3	4.23978	1.01834	4;3;3	22.32	4	6	24	8.99317e+06	156.267	22.32	6	10	111.864	19.57	5	7	112.847	19.57	5	7	327	37.3267	6.81494
	ENSP00000217515	TXNL1 HGNC Symbol|thioredoxin-like 1 [Source:HGNC Symbol;Acc:12436]|ENSG00000091164|18|ENST00000217515	3		1.094	8.18148	1.04325	-;2;2	-;2;2	14.2832	0.925404	-;2;2	8.65	2	3	10	5.87288e+06					63.92	8.65	3	4	74.0681	8.65	3	6	289	32.2307	4.95752
	ENSP00000231572	RARS HGNC Symbol|arginyl-tRNA synthetase [Source:HGNC Symbol;Acc:9870]|5|ENSG00000113643|ENST00000231572	14	31.7776	0.956196	34.2291	1.04356	7;6;9	7;6;9	12.8629	1.08049	7;6;9	27.73	4	14	68	2.41512e+07	239.042	14.39	8	20	219.938	19.24	11	19	367.93	25.15	13	29	660	75.3309	6.68311
	ENSP00000441799	AL593848.10 Clone-based (Ensembl)|surfeit locus protein 4 [Source:RefSeq peptide;Acc:NP_149351]|ENSG00000256606|HG79_PATCH|ENST00000538240	2	17.1188	0.939607	20.447	1.04397	2;2;2	2;2;2	12.9711	1.09893	2;2;2	18.75	5	2	17	9.94255e+07	98.8692	18.75	2	5	136.952	18.75	2	6	125.868	18.75	2	6	128	14.8445	5.98584
	ENSP00000219700	HMOX2 HGNC (curated)|Heme oxygenase 2 (HO-2)(EC 1.14.99.3) [Source:UniProtKB/Swiss-Prot;Acc:P30519]|16|ENSG00000103415|ENST00000219700	7		1.06875	1.84498	1.04403	-;5;8	-;5;8	19.9755	0.969763	-;5;8	43.35	1	7	46	4.17124e+07	109.85	6.01	1	6	210.57	26.58	4	18	344.144	43.35	7	22	316	36.0098	5.41455
	ENSP00000249923	COPB1 HGNC (automatic)|Coatomer subunit beta (Beta-coat protein)(Beta-COP) [Source:UniProtKB/Swiss-Prot;Acc:P53618]|11|ENSG00000129083|ENST00000249923	14	19.1917	0.792723	24.822	1.045	14;12;15	14;12;15	3.50668	1.23489	14;12;15	24.24	4	15	143	3.5416e+07	496.269	19.41	13	47	366.478	13.64	11	39	746.772	21.62	14	57	953	107.074	6.04932
	ENSP00000354125	EIF3B HGNC Symbol|eukaryotic translation initiation factor 3, subunit B [Source:HGNC Symbol;Acc:3280]|ENSG00000106263|7|ENST00000360876	14	13.931	0.921995	16.4366	1.0456	13;6;4	13;6;4	6.47286	1.12074	13;6;4	24.2	5	14	120	3.97221e+07	654.2	18.55	13	41	567.09	22.24	12	41	896.203	17.44	11	38	814	92.4238	4.99561
	ENSP00000440543	CS HGNC Symbol|citrate synthase [Source:HGNC Symbol;Acc:2422]|ENSG00000062485|12|ENST00000542324	10	13.0693	1.17301	16.1337	1.04576	9;9;8	9;9;8	12.4439	0.920767	9;9;8	41.06	21	10	168	2.37692e+08	796.551	36.42	9	54	626.264	41.06	10	56	798.784	36.42	9	58	453	50.3997	7.89893
	ENSP00000398524	TNPO1 HGNC Symbol|transportin 1 [Source:HGNC Symbol;Acc:6401]|5|ENSG00000083312|ENST00000454282	8	75.05	1.79082	43.5055	1.04669	2;1;3	2;1;3	45.255	0.666534	2;1;3	15.09	3	8	23	1.97914e+07	72.2033	6.49	4	8	74.368	5.31	4	5	214.71	12.15	7	10	848	96.838	4.93213
	ENSP00000269349	EIF4A3 HGNC (automatic)|Eukaryotic initiation factor 4A-III (EC 3.6.1.-)(Eukaryotic translation initiation factor 4A isoform 3)(ATP-dependent RNA helicase eIF4A-3)(ATP-dependent RNA helicase DDX48)(DEAD box protein 48)(Eukaryotic initiation factor 4A-like NUK-34)(Nuclear matrix protein 265)(hNMP 265) [Source:UniProtKB/Swiss-Prot;Acc:P38919]|17|ENSG00000141543|ENST00000269349	13	16.1523	1.14537	15.7147	1.04834	28;17;23	28;17;23	2.47403	0.929498	28;17;23	43.55	9	14	198	9.11045e+07	1209.69	35.77	13	77	758.343	43.55	14	56	876.936	35.77	13	65	411	46.8412	6.72705
	ENSP00000378368	FLOT2 HGNC Symbol|flotillin 2 [Source:HGNC Symbol;Acc:3758]|17|ENSG00000132589|ENST00000394908	12	52.3663	0.624171	50.4627	1.04846	10;8;9	10;8;9	6.76141	1.55441	10;8;9	45.56	2	13	86	3.61423e+07	655.763	36.92	11	35	452.667	34.11	9	22	463.039	37.62	10	29	428	47.0347	5.24951
	ENSP00000379676	PSMA1 HGNC Symbol|proteasome (prosome, macropain) subunit, alpha type, 1 [Source:HGNC Symbol;Acc:9530]|ENSG00000129084|11|ENST00000396394	8	12.9591	1.22127	11.7703	1.04854	5;6;7	5;6;7	11.4241	0.890206	5;6;7	58.56	4	9	73	4.9757e+07	180.647	24.71	5	16	301.906	58.56	9	27	335.191	33.84	7	30	263	29.5369	6.60986
	ENSP00000225698	C1QBP HGNC Symbol|complement component 1, q subcomponent binding protein [Source:HGNC Symbol;Acc:1243]|ENSG00000108561|17|ENST00000225698	1		0.827865		1.04881	-;-;1	-;-;1		1.22129	-;-;1	9.93	1	1	14	9.23734e+06					34.45	9.93	1	3	63.8996	9.93	1	11	282	31.3426	4.84326
	ENSP00000384302	WDR43 HGNC Symbol|WD repeat domain 43 [Source:HGNC Symbol;Acc:28945]|ENSG00000163811|2|ENST00000407426	4	22.6641	1.22282	11.5238	1.05022	3;2;1	3;2;1	16.365	0.862539	3;2;1	5.47	1	4	34	1.50827e+07	168.437	5.47	4	15	129.29	4.28	3	10	125.342	4.28	3	9	677	74.8434	5.56689
	ENSP00000331897	IDH2 HGNC Symbol|isocitrate dehydrogenase 2 (NADP+), mitochondrial [Source:HGNC Symbol;Acc:5383]|ENSG00000182054|15|ENST00000330062	8	14.6252	1.35758	9.37581	1.05111	23;15;16	23;15;16	5.57814	0.742075	23;15;16	31.42	4	9	109	5.82417e+07	665.155	31.42	9	47	483.353	27.43	8	30	539.283	22.79	7	32	452	50.8769	8.68994
	ENSP00000353408	MSN HGNC Symbol|moesin [Source:HGNC Symbol;Acc:7373]|ENSG00000147065|X|ENST00000360270	29	18.0892	0.867956	6.96449	1.05132	140;134;138	140;134;138	13.2364	1.20695	140;134;138	66.38	1	37	1604	4.03225e+08	8123.18	65.34	36	526	7725.23	63.78	32	535	8909.29	64.82	33	543	577	67.7778	6.40479
	ENSP00000347596	EFEMP1 HGNC Symbol|EGF containing fibulin-like extracellular matrix protein 1 [Source:HGNC Symbol;Acc:3218]|ENSG00000115380|2|ENST00000355426	13	37.0654	1.00035	54.0261	1.0518	1;3;-	1;3;-		0.928353	1;3;-	44.42	4	13	76	3.95107e+07	214.032	18.66	7	17	462.741	44.42	13	29	603.173	27.18	9	30	493	54.6042	5.07178
	ENSP00000324122	PRPF31 HGNC Symbol|PRP31 pre-mRNA processing factor 31 homolog (S. cerevisiae) [Source:HGNC Symbol;Acc:15446]|ENSG00000105618|19|ENST00000321030	11	30.8813	0.936893	28.6404	1.05275	7;5;6	7;5;6	7.59038	1.08547	7;5;6	28.66	7	12	53	3.91756e+07	335.195	13.63	6	20	258.151	22.24	9	15	258.224	21.04	10	18	499	55.4214	5.78271
	ENSP00000312999	GNAI2 HGNC (curated)|Guanine nucleotide-binding protein G(i), alpha-2 subunit (Adenylate cyclase-inhibiting G alpha protein) [Source:UniProtKB/Swiss-Prot;Acc:P04899]|3|ENSG00000114353|ENST00000313601	10	20.3602	0.67957	13.2394	1.05343	8;5;6	8;5;6	5.46375	1.52709	8;5;6	34.93	8	10	119	1.504e+08	521.474	34.93	10	38	646.931	25.07	8	36	646.372	34.93	9	45	355	40.4251	5.5415
	ENSP00000287295	AIFM1 HGNC Symbol|apoptosis-inducing factor, mitochondrion-associated, 1 [Source:HGNC Symbol;Acc:8768]|ENSG00000156709|X|ENST00000287295	4		1.6707		1.05348	1;-;-	1;-;-		0.648141	1;-;-	6.53	7	6	31	4.71802e+06	22.58	5.22	4	9	62.54	5.38	4	10	63.5143	6.53	6	12	613	66.8589	8.95361
	ENSP00000419890	KPNA1 HGNC Symbol|karyopherin alpha 1 (importin alpha 5) [Source:HGNC Symbol;Acc:6394]|ENSG00000114030|3|ENST00000465882	2	26.0716	0.945778	23.097	1.0546	1;1;1	1;1;1	1.52781	1.10463	1;1;1	14.63	6	4	19	1.44204e+07	110.08	12.5	3	7	89.6	12.5	3	6	101.44	14.63	4	6	328	36.8067	5.2876
	ENSP00000393910	ATP6V0D1 HGNC Symbol|ATPase, H+ transporting, lysosomal 38kDa, V0 subunit d1 [Source:HGNC Symbol;Acc:13724]|16|ENSG00000159720|ENST00000426604	3		0.673383	9.44387	1.05478	-;1;1	-;1;1	61.0143	1.80433	-;1;1	11.68	3	3	8	2.70177e+07	35.58	4.01	1	1	45.64	7.3	2	3	103.217	11.68	3	4	274	31.6559	5.19873
	ENSP00000440973	BCAT2 HGNC Symbol|branched chain amino-acid transaminase 2, mitochondrial [Source:HGNC Symbol;Acc:977]|ENSG00000105552|19|ENST00000545387	9		0.970712	6.25478	1.05523	-;3;3	-;3;3	11.9149	1.05874	-;3;3	40.67	3	10	36	3.5881e+07	91.3767	18.67	4	5	179.493	40.67	10	17	191.886	28.67	8	14	300	33.7546	7.72314
	ENSP00000246533	CAPNS1 HGNC Symbol|calpain, small subunit 1 [Source:HGNC Symbol;Acc:1481]|ENSG00000126247|19|ENST00000246533	7		1.01548	2.41222	1.05588	-;3;4	-;3;4	11.999	1.03056	-;3;4	45.15	2	7	50	9.79534e+07	190.769	19.03	3	8	615.884	45.15	7	19	583.28	45.15	7	23	268	28.2977	5.19873
	ENSP00000262027	MARS HGNC Symbol|methionyl-tRNA synthetase [Source:HGNC Symbol;Acc:6898]|ENSG00000166986|12|ENST00000262027	9		2.20966		1.05592	-;1;-	-;1;-		0.462643	-;1;-	16.78	10	10	46	2.26884e+07	194.18	10.11	6	11	274.62	16.78	10	18	314.621	10.44	7	17	900	101.052	6.16357
	ENSP00000426923	CCT5 HGNC Symbol|chaperonin containing TCP1, subunit 5 (epsilon) [Source:HGNC Symbol;Acc:1618]|ENSG00000150753|5|ENST00000515390	1	37.2	1.25868	36.1236	1.05642	2;2;2	2;2;2	13.0451	0.828145	2;2;2	32.72	6	11	103	5.48017e+07	286.263	20.37	7	30	320.086	32.72	11	35	434.771	29.01	10	38	486	53.814	6.41748
	ENSP00000305260	GNB2 HGNC Symbol|guanine nucleotide binding protein (G protein), beta polypeptide 2 [Source:HGNC Symbol;Acc:4398]|ENSG00000172354|7|ENST00000303210	6	17.165	1.17548	20.7323	1.05733	12;9;8	12;9;8	9.09843	0.889358	12;9;8	64.41	9	11	196	1.92693e+08	1098.34	58.24	10	59	1160.89	64.41	11	66	1319.35	64.41	11	71	340	37.3071	5.99854
	ENSP00000418401	SRPRB HGNC Symbol|signal recognition particle receptor, B subunit [Source:HGNC Symbol;Acc:24085]|ENSG00000144867|3|ENST00000466490	6		0.812352		1.05753	-;1;-	-;1;-		1.26035	-;1;-	23.99	3	6	13	3.22391e+07					189.177	23.99	6	7	199.873	21.77	5	6	271	29.6838	9.0415
	ENSP00000360265	ALDH18A1 HGNC Symbol|aldehyde dehydrogenase 18 family, member A1 [Source:HGNC Symbol;Acc:9722]|ENSG00000059573|10|ENST00000371221	17	30.2528	1.31476	29.6252	1.05862	9;8;6	9;8;6	13.2954	0.816654	9;8;6	31.53	2	17	80	2.47037e+07	397.127	23.2	12	26	398.063	19.67	11	32	447.662	15.64	10	22	793	87.0344	7.12256
	ENSP00000215909	LGALS1 HGNC Symbol|lectin, galactoside-binding, soluble, 1 [Source:HGNC Symbol;Acc:6561]|ENSG00000100097|22|ENST00000215909	3	12.1957	0.830701	13.4463	1.05982	1;15;15	1;15;15	31.3229	1.27736	1;15;15	40.74	1	3	93	3.09544e+08	42.84	40.74	2	4	1022.61	40.74	3	44	1110.98	40.74	3	45	135	14.7062	5.50342
	ENSP00000359024	NOLC1 HGNC Symbol|nucleolar and coiled-body phosphoprotein 1 [Source:HGNC Symbol;Acc:15608]|ENSG00000166197|10|ENST00000370007	4		0.954978	16.5604	1.06089	-;1;1	-;1;1	11.9762	1.09123	-;1;1	7.15	2	4	7	4.75649e+06					24.63	4.15	2	4	34.4867	5.15	3	3	699	73.5596	9.46631
	ENSP00000263257	NOVA2 HGNC Symbol|neuro-oncological ventral antigen 2 [Source:HGNC Symbol;Acc:7887]|ENSG00000104967|19|ENST00000263257	3	43.6208	1.13573	48.1466	1.06198	1;4;7	1;4;7	12.7349	0.966912	1;4;7	10.57	1	3	21	9.53684e+06	20.47	3.05	1	1	123.977	7.72	2	8	126.42	10.57	3	12	492	48.9786	8.1626
	ENSP00000390304	PCBP2 HGNC (automatic)|Poly(rC)-binding protein 2 (Alpha-CP2)(hnRNP-E2) [Source:UniProtKB/Swiss-Prot;Acc:Q15366]|12|ENSG00000197111|ENST00000437231	5	24.2541	1.04792	27.3743	1.06215	8;13;22	8;13;22	8.96935	0.987529	8;13;22	39.62	28	7	105	1.08847e+08	374.795	39.62	7	22	646.41	39.62	7	39	786.094	39.62	7	44	318	33.4753	8.23584
	ENSP00000382696	ATP6V1E1 HGNC Symbol|ATPase, H+ transporting, lysosomal 31kDa, V1 subunit E1 [Source:HGNC Symbol;Acc:857]|ENSG00000131100|22|ENST00000399798	5		0.918785	1.77517	1.06215	-;5;4	-;5;4	4.10018	1.14097	-;5;4	29.41	4	5	21	1.91374e+07					144.11	29.41	5	10	163.583	29.41	5	11	204	23.5725	8.98291
	ENSP00000434329	PPP5C HGNC Symbol|protein phosphatase 5, catalytic subunit [Source:HGNC Symbol;Acc:9322]|19|ENSG00000011485|ENST00000478046	4	39.3224	1.06475	34.1719	1.06231	1;1;2	1;1;2	20.7775	1.01834	1;1;2	12.16	5	5	15	9.08907e+06	106.033	9.69	4	5	73.4693	8.25	4	5	76.3172	5.77	3	5	485	55.1714	6.20166
	ENSP00000405088	ECE1 HGNC Symbol|endothelin converting enzyme 1 [Source:HGNC Symbol;Acc:3146]|ENSG00000117298|1|ENST00000415912	9	23.5569	0.928964	3.56175	1.06289	6;8;10	6;8;10	13.1469	1.16187	6;8;10	18.97	22	11	73	1.62229e+07	203.278	9.15	7	23	192.842	11.94	7	23	237.412	16.31	9	27	754	85.5073	5.79541
	ENSP00000343458	BCAP31 HGNC (curated)|B-cell receptor-associated protein 31 (BCR-associated protein Bap31)(p28 Bap31)(Protein CDM)(6C6-AG tumor-associated antigen) [Source:UniProtKB/Swiss-Prot;Acc:P51572]|X|ENSG00000185825|ENST00000345046	6	38.4892	0.821018	44.6689	1.06419	6;9;7	6;9;7	12.6763	1.24406	6;9;7	40.24	7	6	68	8.79756e+07	239.975	40.24	6	26	322.056	36.99	4	26	316.473	40.24	5	16	246	27.974	8.44092
	ENSP00000373220	PDHB HGNC Symbol|pyruvate dehydrogenase (lipoamide) beta [Source:HGNC Symbol;Acc:8808]|ENSG00000168291|3|ENST00000383714	3		1.68031	39.3472	1.06484	-;2;1	-;2;1	42.3346	0.616504	-;2;1	17.89	5	3	17	3.25483e+07	221.86	4.69	1	4	137.153	17.89	3	6	270.043	17.89	3	7	341	37.1759	5.89697
	ENSP00000361064	MINPP1 HGNC Symbol|multiple inositol-polyphosphate phosphatase 1 [Source:HGNC Symbol;Acc:7102]|ENSG00000107789|10|ENST00000371996	4	6.9414	1.19879		1.06607	1;-;1	1;-;1	24.7017	0.883527	1;-;1	12.73	4	4	8	5.42991e+06	64.4427	12.73	4	5					23.0784	3.49	2	3	487	55.0161	7.81104
	ENSP00000442839	OPA3 HGNC Symbol|optic atrophy 3 (autosomal recessive, with chorea and spastic paraplegia) [Source:HGNC Symbol;Acc:8142]|19|ENSG00000125741|ENST00000544371	2		1.01348		1.06752	-;-;1	-;-;1		1.01542	-;-;1	15.08	2	2	3	2.31425e+06									23.09	15.08	2	3	126	13.8532	6.93213
	ENSP00000377943	TCERG1 HGNC Symbol|transcription elongation regulator 1 [Source:HGNC Symbol;Acc:15630]|ENSG00000113649|5|ENST00000394421	10	62.5858	1.05338		1.0682	2;-;1	2;-;1	21.7772	1.09355	2;-;1	17.64	3	18	63	6.5619e+07	150.89	15.97	16	27	91.1717	7.24	8	17	109.717	9.38	10	19	1077	121.614	8.54346
	ENSP00000299421	ILK HGNC Symbol|integrin-linked kinase [Source:HGNC Symbol;Acc:6040]|ENSG00000166333|11|ENST00000299421	10	23.0224	0.867622	23.4433	1.06868	2;2;2	2;2;2	7.6033	1.21723	2;2;2	26.99	7	10	40	2.3406e+07	162.588	24.78	9	14	161.86	19.25	6	13	145.621	22.12	8	13	452	51.3859	8.07471
	ENSP00000296930	NPM1 HGNC (curated)|Nucleophosmin (NPM)(Nucleolar phosphoprotein B23)(Numatrin)(Nucleolar protein NO38) [Source:UniProtKB/Swiss-Prot;Acc:P06748]|5|ENSG00000181163|ENST00000296930	2		1.22578	1.03078	1.0689	-;2;1	-;2;1	15.8049	0.85221	-;2;1	12.93	3	2	30	1.85869e+08	55.3516	4.76	1	4	235.23	12.93	2	13	146.8	12.93	2	13	294	32.5548	4.77979
	ENSP00000358175	HIST2H3PS2 HGNC (curated)|Histone H3 [Source:UniProtKB/TrEMBL;Acc:Q5TEC6]|1|ENSG00000203818|ENST00000369176	1		2.1145	14.2249	1.06956	-;1;5	-;1;5	10.7467	0.506859	-;1;5	50.74	1	8	415	1.74295e+09	1730.17	38.24	6	100	2865.93	50.74	8	157	3107.98	50.74	8	158	136	15.4206	11.2681
	ENSP00000385109	SEPT2 HGNC Symbol|septin 2 [Source:HGNC Symbol;Acc:7729]|ENSG00000168385|2|ENST00000401990	10	19.0199	0.874212	18.5679	1.06987	2;3;5	2;3;5	6.25107	1.2007	2;3;5	50.13	15	12	134	7.37776e+07	560.073	42.59	10	33	950.302	36.66	10	49	1173.86	42.32	11	52	371	42.658	6.85889
	ENSP00000246117	NCLN HGNC (automatic)|Nicalin Precursor (Nicastrin-like protein) [Source:UniProtKB/Swiss-Prot;Acc:Q969V3]|19|ENSG00000125912|ENST00000246117	16	18.1009	0.828771	26.6944	1.07147	7;6;3	7;6;3	14.2447	1.2096	7;6;3	29.48	1	16	104	2.57528e+07	447.637	25.75	15	42	346.76	27.18	14	30	382.739	22.38	12	32	563	62.9346	6.88818
	ENSP00000433397	HYOU1 HGNC Symbol|hypoxia up-regulated 1 [Source:HGNC Symbol;Acc:16931]|ENSG00000149428|11|ENST00000525859	22	8.27686	1.40659	4.00361	1.07169	30;28;22	30;28;22	5.19235	0.722545	30;28;22	29.88	10	23	288	7.02326e+07	1125.89	29.46	22	94	1106.55	26.57	21	98	1051.46	29.88	23	96	937	104.713	5.71924
	ENSP00000357535	ECHS1 HGNC Symbol|enoyl CoA hydratase, short chain, 1, mitochondrial [Source:HGNC Symbol;Acc:3151]|ENSG00000127884|10|ENST00000368547	3		1.5189	14.9961	1.07197	-;2;2	-;2;2	21.4934	0.7088	-;2;2	11.72	1	3	9	1.68138e+07					78.85	11.72	3	5	69.5309	11.72	3	4	290	31.3671	8.07471
	ENSP00000216038	C22orf28 HGNC Symbol|chromosome 22 open reading frame 28 [Source:HGNC Symbol;Acc:26935]|ENSG00000100220|22|ENST00000216038	10	9.8515	1.06795	11.8523	1.07251	14;13;15	14;13;15	2.01818	0.990783	14;13;15	37.82	2	10	90	3.24701e+07	346.385	22.77	7	29	320.477	26.34	8	30	410.335	37.82	10	31	505	55.1749	7.2251
	ENSP00000356520	DHX9 HGNC (curated)|ATP-dependent RNA helicase A (EC 3.6.1.-)(Nuclear DNA helicase II)(NDH II)(DEAH box protein 9) [Source:UniProtKB/Swiss-Prot;Acc:Q08211]|1|ENSG00000135829|ENST00000367549	38	28.861	1.02068	20.1605	1.07368	50;53;46	50;53;46	9.83002	1.03457	50;53;46	41.42	2	39	548	3.66892e+08	2609.87	41.42	39	192	2427.48	37.48	37	192	2391.59	32.2	34	164	1270	140.869	6.84424
	ENSP00000351094	MYOF HGNC Symbol|myoferlin [Source:HGNC Symbol;Acc:3656]|ENSG00000138119|10|ENST00000358334	29	13.5185	0.820001	3.0018	1.07503	16;19;21	16;19;21	11.2013	1.36725	16;19;21	21	6	31	305	7.83148e+07	957.439	16.36	26	95	1145.98	17.97	27	112	1241	18.21	27	98	2048	233.329	6.21436
	ENSP00000263774	NDUFS3 HGNC Symbol|NADH dehydrogenase (ubiquinone) Fe-S protein 3, 30kDa (NADH-coenzyme Q reductase) [Source:HGNC Symbol;Acc:7710]|ENSG00000213619|11|ENST00000263774	8		1.14848	9.5648	1.07585	-;2;2	-;2;2	10.3676	0.914113	-;2;2	34.47	1	8	18	3.11444e+07	36.92	4.92	1	2	188.615	28.79	6	6	235.06	31.82	7	10	264	30.2227	7.50342
	ENSP00000231487	SKP1 HGNC Symbol|S-phase kinase-associated protein 1 [Source:HGNC Symbol;Acc:10899]|5|ENSG00000113558|ENST00000353411	1		1.23729	8.6876	1.07585	-;1;1	-;1;1	5.81642	0.843766	-;1;1	5.52	2	1	2	5.85861e+06					46.48	5.52	1	1	30.07	5.52	1	1	163	18.6462	4.53857
	ENSP00000441274	GLUD1 HGNC Symbol|glutamate dehydrogenase 1 [Source:HGNC Symbol;Acc:4335]|ENSG00000148672|10|ENST00000513510	13	13.3053	0.714096	12.4037	1.07716	30;25;27	30;25;27	5.24011	1.52752	30;25;27	38.37	7	13	216	1.53216e+08	1250.45	32.65	12	86	976.996	38.37	13	65	1200.04	32.65	12	65	490	54.2526	7.79639
	ENSP00000354720	SMC3 HGNC (curated)|Structural maintenance of chromosomes protein 3 (Chondroitin sulfate proteoglycan 6)(Chromosome-associated polypeptide)(hCAP)(Basement membrane-associated chondroitin proteoglycan)(Bamacan) [Source:UniProtKB/Swiss-Prot;Acc:Q9UQE7]|10|ENSG00000108055|ENST00000361804	20	66.3185	0.790866	53.0723	1.07868	10;7;9	10;7;9	11.9918	1.41195	10;7;9	28.76	1	24	118	2.41283e+07	566.538	18.57	19	41	377.242	19.97	16	39	423.268	19.64	18	38	1217	141.454	7.18115
	ENSP00000299157	IKBIP HGNC Symbol|IKBKB interacting protein [Source:HGNC Symbol;Acc:26430]|ENSG00000166130|12|ENST00000299157	4	19.7808	0.928321	21.4086	1.07898	3;2;1	3;2;1	3.27312	1.1311	3;2;1	31.83	2	8	59	2.92014e+07	176.267	30.24	7	17	173.72	23.08	6	17	206.833	23.61	6	25	377	43.0565	4.91943
	ENSP00000298852	PSMC3 HGNC Symbol|proteasome (prosome, macropain) 26S subunit, ATPase, 3 [Source:HGNC Symbol;Acc:9549]|ENSG00000165916|11|ENST00000298852	10	12.4583	1.09488	5.84781	1.0791	9;10;10	9;10;10	9.77576	0.988156	9;10;10	30.98	9	10	77	4.40105e+07	417.572	19.13	8	26	343.509	25.06	9	23	373.987	25.06	9	28	439	49.1725	5.23682
	ENSP00000444954	TMX3 HGNC Symbol|thioredoxin-related transmembrane protein 3 [Source:HGNC Symbol;Acc:24718]|ENSG00000166479|18|ENST00000544714	5	10.9905	0.958481	13.2248	1.07971	9;6;5	9;6;5	7.13211	1.22434	9;6;5	15.31	3	5	46	2.18033e+07	313.344	10.29	4	18	210.367	10.29	4	16	216.747	15.31	5	12	418	47.8871	5.26221
	ENSP00000406950	ARHGAP17 HGNC Symbol|Rho GTPase activating protein 17 [Source:HGNC Symbol;Acc:18239]|ENSG00000140750|16|ENST00000441763	2		0.928151	3.5092	1.07987	-;1;2	-;1;2	38.8103	1.20791	-;1;2	6.64	4	2	8	1.09543e+06					0	6.64	2	3	27.5026	6.64	2	5	226	25.7441	7.15186
	ENSP00000257770	NT5E HGNC Symbol|5'-nucleotidase, ecto (CD73) [Source:HGNC Symbol;Acc:8021]|ENSG00000135318|6|ENST00000257770	5	22.7835	0.402467	21.3538	1.08009	2;3;2	2;3;2	30.3789	2.7291	2;3;2	15.85	5	5	26	1.2629e+07	255.4	15.85	5	11	109.65	12.37	4	7	151.557	15.85	5	8	574	63.3275	7.03467
	ENSP00000336927	ALDOA HGNC Symbol|aldolase A, fructose-bisphosphate [Source:HGNC Symbol;Acc:414]|ENSG00000149925|16|ENST00000338110	10	22.3208	0.856824	13.5875	1.08141	24;33;42	24;32;42	19.6978	1.22894	24;32;43	52.75	16	10	298	3.49703e+08	1015.8	46.98	9	79	1637.22	52.75	10	100	2158.26	52.75	10	119	364	39.3953	8.08936
	ENSP00000431334	NUCB2 HGNC Symbol|nucleobindin 2 [Source:HGNC Symbol;Acc:8044]|ENSG00000070081|11|ENST00000529313	1	7.96475	0.948904	11.5308	1.08158	2;3;3	2;3;3	8.66945	1.08148	2;3;3	10.77	6	2	18	8.99847e+06	52.57	6.67	1	4	84.328	10.77	2	7	150.057	10.77	2	7	195	23.1711	6.53662
	ENSP00000434865	ATP5L HGNC Symbol|ATP synthase, H+ transporting, mitochondrial Fo complex, subunit G [Source:HGNC Symbol;Acc:14247]|ENSG00000167283|11|ENST00000524422	1		1.19463	0.318415	1.08246	-;1;1	-;1;1	10.8832	0.880295	-;1;1	26.32	2	1	6	7.63111e+07					114.033	26.32	1	3	105.943	26.32	1	3	76	8.44668	10.2866
	ENSP00000336580	ACOT9 HGNC Symbol|acyl-CoA thioesterase 9 [Source:HGNC Symbol;Acc:17152]|ENSG00000123130|X|ENST00000336430	12	16.3485	1.06361	9.70389	1.08264	10;7;9	10;7;9	4.8252	1.04256	10;7;9	39.86	5	14	88	4.46261e+07	340.502	38.27	12	30	387.912	25.97	10	30	297.243	24.15	8	28	439	49.8695	8.60205
	ENSP00000456738	UQCRC2 HGNC Symbol|ubiquinol-cytochrome c reductase core protein II [Source:HGNC Symbol;Acc:12586]|16|ENSG00000140740|ENST00000563898	10	3.71905	1.26794	19.8027	1.08264	13;6;6	13;6;6	17.6083	0.854752	13;6;6	48.81	6	10	92	5.64151e+07	647.319	48.81	10	41	403.737	44.64	8	28	302.358	34.23	7	23	336	36.3668	9.05615
	ENSP00000276079	NONO HGNC Symbol|non-POU domain containing, octamer-binding [Source:HGNC Symbol;Acc:7871]|ENSG00000147140|X|ENST00000276079	26	72.1619	1.25694	62.9915	1.08308	65;60;69	65;60;69	10.6193	0.89109	65;60;69	69.85	7	29	624	3.34166e+08	3390.94	69.85	29	215	3232.7	65.61	26	198	3331.78	65.61	26	211	471	54.1973	8.95361
	ENSP00000327054	LMNB2 HGNC Symbol|lamin B2 [Source:HGNC Symbol;Acc:6638]|ENSG00000176619|19|ENST00000325327	30	43.49	1.0369	31.765	1.08371	66;55;58	66;55;58	7.11551	1.05814	66;55;58	64.67	1	35	682	2.17592e+08	3387.61	61.67	33	224	3232.82	62.83	32	209	4208.32	64.33	34	249	600	67.6475	5.35107
	ENSP00000370113	PPP2R2A HGNC Symbol|protein phosphatase 2, regulatory subunit B, alpha [Source:HGNC Symbol;Acc:9304]|ENSG00000221914|8|ENST00000380737	9	22.8015	1.10979	23.7399	1.08434	6;4;6	6;4;6	13.6871	0.939405	6;4;6	24.38	9	9	52	1.90692e+07	97.643	18.12	7	15	83.3661	22.6	8	16	93.7985	19.91	8	21	447	51.6595	6.20166
	ENSP00000349101	HNRNPA2B1 HGNC Symbol|heterogeneous nuclear ribonucleoprotein A2/B1 [Source:HGNC Symbol;Acc:5033]|ENSG00000122566|7|ENST00000356674	15	20.1617	1.14535	20.2003	1.08531	38;50;55	38;50;55	16.5816	0.947162	38;50;55	76.54	14	17	720	6.08537e+08	2893.29	65.4	14	169	4211.71	76.54	16	273	4648.62	73.61	16	278	341	35.9839	8.646
	ENSP00000426743	MATR3 HGNC Symbol|matrin 3 [Source:HGNC Symbol;Acc:6912]|ENSG00000015479|5|ENST00000510056	30	47.7031	1.06035	41.7052	1.08555	52;42;44	53;42;44	8.62506	0.99605	52;42;44	50	20	32	539	1.5175e+08	2076.04	50	31	194	1936.67	47.98	30	175	2161.86	48.49	31	170	794	88.3045	5.75732
	ENSP00000168216	HSD17B10 HGNC Symbol|hydroxysteroid (17-beta) dehydrogenase 10 [Source:HGNC Symbol;Acc:4800]|ENSG00000072506|X|ENST00000168216	5		1.06847	11.8291	1.08586	-;1;1	-;1;1	0.578578	0.981318	-;1;1	34.1	3	5	108	1.04019e+09	117.746	8.81	2	24	212.17	34.1	5	45	371.984	31.03	4	39	261	26.9061	7.78174
	ENSP00000325732	HNRNPM HGNC (automatic)|Heterogeneous nuclear ribonucleoprotein M (hnRNP M) [Source:UniProtKB/Swiss-Prot;Acc:P52272]|19|ENSG00000099783|ENST00000348943	2	21.2441	0.772555	29.8888	1.08666	1;1;1	1;1;1	51.5806	1.48181	1;1;1	52.53	2	35	908	2.81619e+08	4938.37	45.73	31	250	5780.65	51.09	34	326	6554.31	47.18	34	332	691	73.5724	8.82178
	ENSP00000376763	CLTC HGNC (curated)|Clathrin heavy chain 1 (CLH-17) [Source:UniProtKB/Swiss-Prot;Acc:Q00610]|17|ENSG00000141367|ENST00000393043	43	22.4801	1.02327	23.8167	1.08666	48;47;51	48;47;51	0.267705	1.01557	48;47;51	42.77	5	44	508	2.89041e+08	2516.44	36.49	36	154	3164.53	38.68	40	190	3025.38	36.79	39	164	1639	187.771	5.69385
	ENSP00000379870	SCFD1 HGNC Symbol|sec1 family domain containing 1 [Source:HGNC Symbol;Acc:20726]|ENSG00000092108|14|ENST00000396629	4	45.315	1.097	4.7052	1.08706	2;2;2	2;2;2	35.9006	1.09679	2;2;2	10.73	8	4	14	5.31472e+06	24.43	6	3	4	39.62	6.18	2	5	133.87	6.18	2	5	550	62.2206	5.85889
	ENSP00000223127	PLOD3 HGNC Symbol|procollagen-lysine, 2-oxoglutarate 5-dioxygenase 3 [Source:HGNC Symbol;Acc:9083]|ENSG00000106397|7|ENST00000223127	25	27.8175	1.11765	33.8649	1.08725	10;8;10	10;8;10	10.3318	0.906541	10;8;10	47.83	8	25	148	4.21242e+07	741.193	38.62	21	54	628.326	34.15	19	49	583.826	28.73	18	45	738	84.7315	6.04932
	ENSP00000358554	BCAS2 HGNC Symbol|breast carcinoma amplified sequence 2 [Source:HGNC Symbol;Acc:975]|ENSG00000116752|1|ENST00000369541	2		1.11999	16.308	1.08771	-;1;1	-;1;1	2.33096	0.936505	-;1;1	10.22	1	2	6	5.66528e+06					24.08	10.22	2	3	25.43	10.22	2	3	225	26.115	5.65576
	ENSP00000380431	ARPC4 HGNC (curated)|Actin-related protein 2/3 complex subunit 4 (Arp2/3 complex 20 kDa subunit)(p20-ARC) [Source:UniProtKB/Swiss-Prot;Acc:P59998]|3|ENSG00000241553|ENST00000397261	4	21.4996	1.13176	12.9016	1.08793	2;5;5	2;5;5	17.2134	1.04514	2;5;5	19.05	8	4	26	2.19651e+07	37.49	10.12	2	5	94.5619	16.07	3	9	88.2607	19.05	4	12	168	19.6543	8.42627
	ENSP00000262506	CSNK2A2 HGNC Symbol|casein kinase 2, alpha prime polypeptide [Source:HGNC Symbol;Acc:2459]|ENSG00000070770|16|ENST00000262506	3		1.12262		1.08801	-;1;-	-;1;-		0.938295	-;1;-	12.57	4	3	6	1.61246e+07					90.09	12.57	3	3	62.2033	12.57	3	3	350	41.1871	8.55811
	ENSP00000371626	TRA2B HGNC Symbol|transformer 2 beta homolog (Drosophila) [Source:HGNC Symbol;Acc:10781]|3|ENSG00000136527|ENST00000382191	5	22.7324	1.12637	6.21324	1.08808	2;4;4	2;4;4	12.8405	0.976191	2;4;4	48.4	4	7	54	6.50554e+07	255.79	43.09	5	11	254.412	43.09	5	21	236.648	48.4	7	22	188	21.9217	10.1548
	ENSP00000451775	SRP54 HGNC Symbol|signal recognition particle 54kDa [Source:HGNC Symbol;Acc:11301]|14|ENSG00000100883|ENST00000555557	3		1.33537	57.7093	1.08856	-;1;1	-;1;1	40.454	0.757814	-;1;1	10.23	3	3	4	1.02883e+07					35.07	6.82	2	2	31.34	7.05	2	2	440	48.6385	9.0415
	ENSP00000373730	H2AFJ HGNC (automatic)|Histone H2A.J (H2a/j) [Source:UniProtKB/Swiss-Prot;Acc:Q9BTM1]|12|ENSG00000111332|ENST00000389078	1		0.937349	8.19159	1.08863	-;2;1	-;2;1	7.13612	1.12789	-;2;1	66.67	5	8	216	1.93943e+09	659.745	27.13	5	53	877.963	66.67	8	85	848.46	35.66	7	78	129	14.0109	10.9019
	ENSP00000432926	TP53I11 HGNC Symbol|tumor protein p53 inducible protein 11 [Source:HGNC Symbol;Acc:16842]|11|ENSG00000175274|ENST00000533937	1	30.9018	1.40535	43.0421	1.09066	1;1;1	1;1;1	15.9472	0.751607	1;1;1	25.81	12	1	6	1.1997e+07	51.6733	25.81	1	3	35.62	25.81	1	1	53.15	25.81	1	2	62	6.86073	9.59814
	ENSP00000408578	ARPC1A HGNC Symbol|actin related protein 2/3 complex, subunit 1A, 41kDa [Source:HGNC Symbol;Acc:703]|7|ENSG00000241685|ENST00000432884	1		1.09978		1.09071	1;-;-	1;-;-		1.0194	1;-;-	12.46	3	2	11	2.18094e+07	53.55	12.46	2	4	37.6167	7.25	1	3	44.6133	7.25	1	4	345	38.578	7.81104
	ENSP00000406058	YWHAE HGNC Symbol|tyrosine 3-monooxygenase/tryptophan 5-monooxygenase activation protein, epsilon polypeptide [Source:HGNC Symbol;Acc:12851]|ENSG00000108953|17|ENST00000414131	6	29.1617	1.00501	25.93	1.09147	4;7;11	4;7;11	2.33082	1.1001	4;7;11	46.35	2	6	65	1.27269e+08	161.17	10.73	2	10	417.167	32.62	5	24	473.667	46.35	6	31	233	26.4872	4.86865
	ENSP00000345445	SAMM50 HGNC (curated)|Sorting and assembly machinery component 50 homolog [Source:UniProtKB/Swiss-Prot;Acc:Q9Y512]|22|ENSG00000100347|ENST00000350028	8	14.7317	0.982733	37.191	1.09183	1;1;1	1;1;1	25.4361	1.07912	1;1;1	17.06	6	9	53	1.40453e+07	77.9318	12.79	8	21	56.1203	9.38	7	14	50.2989	13.65	8	18	469	51.9433	6.90283
	ENSP00000315791	CSTF3 HGNC Symbol|cleavage stimulation factor, 3' pre-RNA, subunit 3, 77kDa [Source:HGNC Symbol;Acc:2485]|11|ENSG00000176102|ENST00000323959	2		2.00915		1.09238	1;-;-	1;-;-		0.55886	1;-;-	3.49	4	3	3	4.79158e+06	26.89	3.49	3	3									717	82.8687	8.11865
	ENSP00000216252	PHF5A HGNC Symbol|PHD finger protein 5A [Source:HGNC Symbol;Acc:18000]|ENSG00000100410|22|ENST00000216252	3		1.07302	3.11191	1.09251	-;1;2	-;1;2	10.3911	0.98726	-;1;2	40.91	1	3	8	1.0773e+07					93.5818	20	2	4	110.002	40.91	3	4	110	12.397	8.41162
	ENSP00000377958	CCT4 HGNC Symbol|chaperonin containing TCP1, subunit 4 (delta) [Source:HGNC Symbol;Acc:1617]|ENSG00000115484|2|ENST00000394440	11	32.7457	1.22734	29.5596	1.09422	23;12;21	23;12;21	15.4102	0.881668	23;12;21	30.06	4	13	178	7.78719e+07	660.715	28.94	12	67	718.678	28.57	12	50	798.195	28.94	12	61	539	57.8878	7.82568
	ENSP00000348886	STOML2 HGNC Symbol|stomatin (EPB72)-like 2 [Source:HGNC Symbol;Acc:14559]|ENSG00000165283|9|ENST00000356493	7	11.7274	1.24859	13.7183	1.09449	1;3;1	1;3;1	18.4037	0.872786	1;3;1	35.39	3	8	61	7.58826e+07	300.245	21.91	6	17	448.009	28.93	6	19	483.535	35.39	8	25	356	38.5102	7.38623
	ENSP00000225525	TAX1BP3 HGNC Symbol|Tax1 (human T-cell leukemia virus type I) binding protein 3 [Source:HGNC Symbol;Acc:30684]|ENSG00000213977|17|ENST00000225525	1		1.05834		1.09452	-;-;1	-;-;1		0.996972	-;-;1	9.68	1	2	5	1.00408e+07	21.09	4.03	1	1					30.05	9.68	2	4	124	13.7261	8.48486
	ENSP00000323421	SMC1A HGNC Symbol|structural maintenance of chromosomes 1A [Source:HGNC Symbol;Acc:11111]|ENSG00000072501|X|ENST00000322213	25	53.4131	0.765837	40.4427	1.09469	16;9;5	16;9;5	8.26544	1.24347	16;9;5	28.87	9	29	97	3.53863e+07	211.805	18.41	19	42	187.518	17.19	17	31	240.415	19.06	17	24	1233	143.144	7.63525
	ENSP00000278412	SSRP1 HGNC Symbol|structure specific recognition protein 1 [Source:HGNC Symbol;Acc:11327]|ENSG00000149136|11|ENST00000278412	8	18.6366	1.05628	18.181	1.09477	4;2;4	4;2;4	6.35154	1.02658	4;2;4	18.05	3	9	61	2.77984e+07	270.27	8.74	6	21	203.963	13.4	7	20	261.493	17.63	8	20	709	81.0244	6.87354
	ENSP00000318494	UBE2D3 HGNC Symbol|ubiquitin-conjugating enzyme E2D 3 (UBC4/5 homolog, yeast) [Source:HGNC Symbol;Acc:12476]|ENSG00000109332|4|ENST00000321805	1		1.27412	18.4959	1.09499	-;1;1	-;1;1	13.4293	0.827344	-;1;1	22.45	14	3	7	1.32497e+07					28.72	22.45	3	3	58.97	22.45	3	4	147	16.6764	7.79639
	ENSP00000361947	PABPC4 HGNC Symbol|poly(A) binding protein, cytoplasmic 4 (inducible form) [Source:HGNC Symbol;Acc:8557]|ENSG00000090621|1|ENST00000372856	4	6.05795	0.964057	10.7182	1.095	2;3;5	2;3;5	9.15946	1.13913	2;3;5	15.85	10	11	93	7.06834e+07	365.758	9.67	6	20	452.825	11.09	8	35	456.485	13.31	9	38	631	69.5348	9.5249
	ENSP00000362110	SF3A3 HGNC Symbol|splicing factor 3a, subunit 3, 60kDa [Source:HGNC Symbol;Acc:10767]|ENSG00000183431|1|ENST00000373019	15	30.6824	1.02492	18.6658	1.095	25;18;21	25;18;21	6.73299	1.05773	25;18;21	41.52	2	15	173	5.77415e+07	776.614	37.72	14	62	512.778	35.73	13	53	742.046	41.52	15	58	501	58.8123	5.37646
	ENSP00000227378	HSPA8 HGNC (automatic)|Heat shock cognate 71 kDa protein (Heat shock 70 kDa protein 8) [Source:UniProtKB/Swiss-Prot;Acc:P11142]|11|ENSG00000109971|ENST00000227378	12	11.1832	1.08532	10.8243	1.09695	82;104;108	82;104;109	7.45754	0.957363	83;104;109	42.57	17	16	826	6.07226e+08	5313.99	42.57	16	246	5737.5	36.38	15	285	6280.84	36.22	14	295	646	70.8542	5.51611
	ENSP00000216218	ST13 HGNC Symbol|suppression of tumorigenicity 13 (colon carcinoma) (Hsp70 interacting protein) [Source:HGNC Symbol;Acc:11343]|ENSG00000100380|22|ENST00000216218	5		1.19643	9.04661	1.09736	-;3;3	-;3;3	15.0957	0.871192	-;3;3	13.28	4	5	12	1.35112e+07					49.79	11.65	4	5	48.0233	9.21	4	7	369	41.3055	5.2749
	ENSP00000303992	TMEM43 HGNC (curated)|Transmembrane protein 43 (Protein LUMA) [Source:UniProtKB/Swiss-Prot;Acc:Q9BTV4]|3|ENSG00000170876|ENST00000306077	8	18.2626	0.929351	28.5048	1.09898	1;1;5	1;1;5	10.3392	1.19401	1;1;5	29.75	1	8	41	5.58568e+07	242.73	14.75	4	11	185.676	22	6	12	278.737	29.75	8	18	400	44.8472	8.1333
	ENSP00000410833	GBE1 HGNC Symbol|glucan (1,4-alpha-), branching enzyme 1 [Source:HGNC Symbol;Acc:4180]|ENSG00000114480|3|ENST00000429644	11	28.9634	0.717338	19.165	1.0993	5;5;11	5;5;11	23.9234	1.61906	5;5;11	24.93	4	11	89	3.26946e+07	240.998	16.52	8	27	193.187	16.52	8	23	295.456	24.93	11	39	702	80.4226	6.31592
	ENSP00000221413	RUVBL2 HGNC Symbol|RuvB-like 2 (E. coli) [Source:HGNC Symbol;Acc:10475]|ENSG00000183207|19|ENST00000221413	16	10.8672	1.20563	13.9498	1.0999	12;9;7	12;9;7	2.42967	0.89303	12;9;7	49.68	2	17	123	6.98598e+07	897.822	49.68	17	45	861.429	49.68	17	36	895.356	46.22	15	42	463	51.1246	5.64307
	ENSP00000368767	ASPH HGNC (automatic)|Aspartyl/asparaginyl beta-hydroxylase (EC 1.14.11.16)(Aspartate beta-hydroxylase)(ASP beta-hydroxylase)(Peptide-aspartate beta-dioxygenase) [Source:UniProtKB/Swiss-Prot;Acc:Q12797]|8|ENSG00000198363|ENST00000379454	5	9.98443	0.92197	6.39816	1.10038	2;4;5	2;4;5	16.0164	1.17528	2;4;5	11.08	9	5	26	4.82622e+06	142.64	5.8	2	5	175.115	8.05	3	10	255.744	9.1	4	11	758	85.8095	5.0083
	ENSP00000317123	SNRNP200 HGNC Symbol|small nuclear ribonucleoprotein 200kDa (U5) [Source:HGNC Symbol;Acc:30859]|2|ENSG00000144028|ENST00000323853	26	45.966	1.13109	28.3599	1.10043	6;5;4	6;5;4	18.3822	1.01522	6;5;4	18.21	6	28	102	8.02708e+07	614.268	12.59	20	31	563.905	13.72	22	38	687.701	13.34	22	33	2136	244.353	6.06201
	ENSP00000422145	ITGA2 HGNC Symbol|integrin, alpha 2 (CD49B, alpha 2 subunit of VLA-2 receptor) [Source:HGNC Symbol;Acc:6137]|ENSG00000164171|5|ENST00000510722	9	20.4445	0.957973	21.674	1.10046	11;9;10	11;9;10	9.07219	1.05819	11;9;10	14.01	4	9	67	3.66582e+07	234.65	10.93	7	24	266.418	8.6	6	23	219.578	11.68	8	20	942	102.762	5.14795
	ENSP00000377446	SUCLG1 HGNC Symbol|succinate-CoA ligase, alpha subunit [Source:HGNC Symbol;Acc:11449]|ENSG00000163541|2|ENST00000393868	2		1.05888	2.47123	1.10097	-;2;2	-;2;2	18.0854	1.01866	-;2;2	10.4	1	2	6	2.28081e+07					41.8233	10.4	2	3	42.54	10.4	2	3	346	36.2268	8.79248
	ENSP00000265462	PRDX5 HGNC Symbol|peroxiredoxin 5 [Source:HGNC Symbol;Acc:9355]|ENSG00000126432|11|ENST00000265462	1		1.20206	6.13479	1.10103	-;2;3	-;2;3	0.215397	0.883279	-;2;3	4.21	1	1	12	2.06105e+07					69.0403	4.21	1	5	83.3333	4.21	1	7	214	22.0725	8.70459
	ENSP00000297983	NDUFB6 HGNC Symbol|NADH dehydrogenase (ubiquinone) 1 beta subcomplex, 6, 17kDa [Source:HGNC Symbol;Acc:7701]|ENSG00000165264|9|ENST00000350021	1		1.21852	16.7473	1.10121	-;1;1	-;1;1	9.89784	0.884288	-;1;1	22.12	2	3	8	1.22291e+07					66.75	13.27	2	4	47.82	22.12	3	4	113	13.7071	9.5249
	ENSP00000256196	RRAS2 HGNC Symbol|related RAS viral (r-ras) oncogene homolog 2 [Source:HGNC Symbol;Acc:17271]|ENSG00000133818|11|ENST00000256196	3		0.912434		1.10136	-;2;-	-;2;-		1.16861	-;2;-	28.92	8	4	8	3.32032e+07					143.807	28.92	4	6	107.51	13.73	2	2	204	23.3847	6.01123
	ENSP00000427703	SDHA HGNC Symbol|succinate dehydrogenase complex, subunit A, flavoprotein (Fp) [Source:HGNC Symbol;Acc:10680]|ENSG00000073578|5|ENST00000510361	11	42.378	1.30584	37.5706	1.10328	1;3;2	1;3;2	34.5849	0.897791	1;3;2	28.9	5	12	78	3.94958e+07	376.198	21.27	9	19	481.978	23.7	10	29	516.122	24.35	10	30	616	67.2569	8.11865
	ENSP00000191018	CTSA HGNC Symbol|cathepsin A [Source:HGNC Symbol;Acc:9251]|ENSG00000064601|20|ENST00000191018	3		0.886133	3.75235	1.10348	-;2;2	-;2;2	2.84176	1.20405	-;2;2	8.75	5	3	5	1.19212e+07	26.38	5	1	1	50.9	3.75	2	2	55.47	3.75	2	2	480	54.4311	6.60986
	ENSP00000263238	ACTR3 HGNC Symbol|ARP3 actin-related protein 3 homolog (yeast) [Source:HGNC Symbol;Acc:170]|ENSG00000115091|2|ENST00000263238	12	21.4869	1.01642	17.663	1.10416	15;20;19	15;20;19	16.6277	1.11984	15;20;19	55.26	10	12	171	1.13463e+08	790.297	55.26	12	52	919.68	55.26	12	57	967.845	55.26	12	62	418	47.341	5.88428
	ENSP00000261303	PSMC1 HGNC Symbol|proteasome (prosome, macropain) 26S subunit, ATPase, 1 [Source:HGNC Symbol;Acc:9547]|ENSG00000100764|14|ENST00000261303	12	14.211	1.09001	11.0417	1.10511	12;11;12	12;11;12	8.0521	0.980427	12;11;12	39.32	2	12	152	5.35862e+07	373.044	36.36	11	47	561.924	39.32	12	50	641.127	39.32	12	55	440	49.1537	6.21436
	ENSP00000423339	DYNC1I2 HGNC Symbol|dynein, cytoplasmic 1, intermediate chain 2 [Source:HGNC Symbol;Acc:2964]|ENSG00000077380|2|ENST00000508530	7	30.6306	0.934405	30.9027	1.10787	2;2;2	2;2;2	8.41629	1.16954	2;2;2	16.37	27	9	117	6.34059e+07	177.287	11.29	7	24	265.658	16.37	9	47	296.339	15.38	8	46	611	68.2557	5.2876
	ENSP00000442017	GNS HGNC Symbol|glucosamine (N-acetyl)-6-sulfatase [Source:HGNC Symbol;Acc:4422]|ENSG00000135677|12|ENST00000539825	5	23.8786	0.983176	23.6947	1.10834	6;7;7	6;7;7	5.49168	1.06743	6;7;7	17.48	8	6	64	3.91702e+07	305.886	15.35	5	20	382.184	17.48	6	20	438.21	15.35	5	24	469	53.3863	7.76709
	ENSP00000355011	ILF2 HGNC (curated)|Interleukin enhancer-binding factor 2 (Nuclear factor of activated T-cells 45 kDa) [Source:UniProtKB/Swiss-Prot;Acc:Q12905]|1|ENSG00000143621|ENST00000361891	10	14.4797	1.10484	7.00403	1.10927	12;11;13	12;11;13	7.10186	0.99982	12;11;13	44.87	3	11	153	1.39785e+08	710.745	44.87	11	59	754.111	30.77	8	48	743.333	30.51	7	46	390	43.0352	5.26221
	ENSP00000401802	PSMC6 HGNC Symbol|proteasome (prosome, macropain) 26S subunit, ATPase, 6 [Source:HGNC Symbol;Acc:9553]|ENSG00000100519|14|ENST00000445930	17	21.979	1.32385	47.2433	1.1093	2;6;5	2;6;5	28.4673	0.780839	2;6;5	60.3	8	20	81	5.01676e+07	219.374	29.78	9	16	398.681	57.82	17	33	383.431	54.09	18	32	403	45.768	7.78174
	ENSP00000447764	NACA HGNC Symbol|nascent polypeptide-associated complex alpha subunit [Source:HGNC Symbol;Acc:7629]|12|ENSG00000196531|ENST00000549855	2		1.12221	7.32401	1.10952	-;5;6	-;5;6	8.06711	0.780147	-;5;6	11.9	8	2	18	1.2169e+07					40.74	11.9	2	9	67.0067	11.9	2	9	126	13.5889	4.80518
	ENSP00000304072	DDX54 HGNC Symbol|DEAD (Asp-Glu-Ala-Asp) box polypeptide 54 [Source:HGNC Symbol;Acc:20084]|ENSG00000123064|12|ENST00000306014	3	25.7372	1.52176		1.10985	1;-;1	1;-;1	1.24611	0.728904	1;-;1	11.35	3	10	25	8.57798e+06	129.99	5.22	5	9	118.507	3.06	3	5	130.78	9.19	8	11	881	98.5342	10.0229
	ENSP00000316176	UBE2N HGNC Symbol|ubiquitin-conjugating enzyme E2N (UBC13 homolog, yeast) [Source:HGNC Symbol;Acc:12492]|ENSG00000177889|12|ENST00000318066	5		1.41956	13.3345	1.11004	-;6;6	-;6;6	28.3182	0.777705	-;6;6	38.82	6	5	23	2.75122e+07					76.4581	38.82	5	11	113.882	38.82	5	12	152	17.127	6.56592
	ENSP00000305230	SRP9 HGNC Symbol|signal recognition particle 9kDa [Source:HGNC Symbol;Acc:11304]|ENSG00000143742|1|ENST00000304786	1		1.34783		1.11035	-;1;-	-;1;-		0.797561	-;1;-	9.3	1	1	1	2.7109e+06					21.35	9.3	1	1					86	10.1051	7.97217
	ENSP00000237530	RPN2 HGNC (curated)|Dolichyl-diphosphooligosaccharide--protein glycosyltransferase subunit 2 Precursor (EC 2.4.1.119)(Dolichyl-diphosphooligosaccharide--protein glycosyltransferase 63 kDa subunit)(Ribophorin-2)(Ribophorin II)(RPN-II)(RIBIIR) [Source:UniProtKB/Swiss-Prot;Acc:P04844]|20|ENSG00000118705|ENST00000237530	7	1.32738	0.90215	7.65002	1.11123	4;5;4	4;5;4	20.4805	1.02641	4;5;4	26.78	8	7	45	1.15892e+08	206.472	17.59	5	14	311.783	20.44	6	19	205.802	11.25	4	12	631	69.241	5.69385
	ENSP00000380982	KIAA0020 HGNC Symbol|KIAA0020 [Source:HGNC Symbol;Acc:29676]|ENSG00000080608|9|ENST00000397885	5	18.831	1.10023	11.7502	1.11152	3;2;2	3;2;2	12.7323	1.00968	3;2;2	10.19	1	6	32	7.91886e+06	180.874	7.87	4	12	137.905	9.1	5	11	127.155	7.87	4	9	648	73.5383	9.64209
	ENSP00000420094	PLOD2 HGNC Symbol|procollagen-lysine, 2-oxoglutarate 5-dioxygenase 2 [Source:HGNC Symbol;Acc:9082]|ENSG00000152952|3|ENST00000494950	18	24.4624	1.21092	29.4747	1.11251	26;32;34	26;32;34	5.98812	0.864744	26;32;34	39.83	5	18	264	9.31806e+07	1249.11	28.45	15	72	1284.1	32.01	16	89	1783.18	36.98	17	103	703	81.1187	6.65381
	ENSP00000257829	NAT10 HGNC Symbol|N-acetyltransferase 10 (GCN5-related) [Source:HGNC Symbol;Acc:29830]|11|ENSG00000135372|ENST00000257829	8	19.8278	1.36753	4.38039	1.1129	2;2;2	2;2;2	24.8275	0.829822	2;2;2	11.41	4	9	23	3.26275e+07	112.767	6.83	5	7	156.29	8.78	7	8	109.007	9.76	8	8	1025	115.657	8.26514
	ENSP00000215956	NHP2L1 HGNC Symbol|NHP2 non-histone chromosome protein 2-like 1 (S. cerevisiae) [Source:HGNC Symbol;Acc:7819]|ENSG00000100138|22|ENST00000215956	3		1.04923	4.58886	1.11303	-;4;5	-;4;5	6.16732	0.936462	-;4;5	41.41	2	3	20	4.3345e+07					173.645	41.41	3	10	142.374	41.41	3	10	128	14.1646	8.45557
	ENSP00000347897	RSL1D1 HGNC Symbol|ribosomal L1 domain containing 1 [Source:HGNC Symbol;Acc:24534]|ENSG00000171490|16|ENST00000355674	16	18.9397	1.1873	10.6586	1.11316	32;29;31	32;29;31	9.99647	0.953777	32;29;31	44.79	3	16	281	6.39704e+07	1124.54	31.7	14	92	977.643	37.01	15	86	1242.3	44.79	16	103	489	54.8108	10.1255
	ENSP00000241704	COPA HGNC (curated)|Coatomer subunit alpha (Alpha-coat protein)(Alpha-COP)(HEP-COP)(HEPCOP) [Contains Xenin(Xenopsin-related peptide);Proxenin] [Source:UniProtKB/Swiss-Prot;Acc:P53621]|1|ENSG00000122218|ENST00000241704	30	18.879	0.977203	22.2305	1.11366	14;21;16	14;21;16	6.76183	1.10496	14;21;16	38.73	2	30	137	1.00608e+08	519.22	26.47	21	36	850.725	34.48	27	56	793.549	31.45	24	45	1224	138.258	7.66455
	ENSP00000265838	ACAT1 HGNC (automatic)|Acetyl-CoA acetyltransferase, mitochondrial Precursor (EC 2.3.1.9)(Acetoacetyl-CoA thiolase)(T2) [Source:UniProtKB/Swiss-Prot;Acc:P24752]|11|ENSG00000075239|ENST00000265838	4		1.02667	3.2223	1.11407	-;1;1	-;1;1	19.4773	1.07158	-;1;1	14.99	1	4	46	4.84601e+07	224.659	4.92	2	7	300.028	13.58	3	20	342.727	14.99	4	19	427	45.1706	8.85107
	ENSP00000364721	MAPRE1 HGNC Symbol|microtubule-associated protein, RP/EB family, member 1 [Source:HGNC Symbol;Acc:6890]|ENSG00000101367|20|ENST00000375571	2	36.0061	0.900344	38.0366	1.11452	1;3;5	1;3;5	6.50033	1.2789	1;3;5	11.94	1	2	21	1.64943e+07	103.373	11.94	2	4	173.31	11.94	2	8	146.506	11.94	2	9	268	29.9802	5.13525
	ENSP00000260641	ACTR2 HGNC Symbol|ARP2 actin-related protein 2 homolog (yeast) [Source:HGNC Symbol;Acc:169]|ENSG00000138071|2|ENST00000260641	14	22.625	1.02682	15.6612	1.11455	12;14;19	12;14;19	12.6582	1.11386	12;14;19	50.25	4	15	193	9.68251e+08	283.648	23.35	10	50	454.156	38.83	13	64	520.765	50.25	15	79	394	44.7322	6.7417
	ENSP00000365233	TPP2 HGNC Symbol|tripeptidyl peptidase II [Source:HGNC Symbol;Acc:12016]|ENSG00000134900|13|ENST00000376065	3		0.779857		1.11494	-;-;1	-;-;1		1.37822	-;-;1	2.96	2	4	6	4.59258e+06	45.68	2.56	3	4					25.09	1.28	2	2	1249	138.263	6.31592
	ENSP00000222308	FKBP8 HGNC Symbol|FK506 binding protein 8, 38kDa [Source:HGNC Symbol;Acc:3724]|ENSG00000105701|19|ENST00000222308	5	18.2992	0.985732	24.0599	1.11556	1;2;1	1;2;1	4.80021	1.10609	1;2;1	12.59	3	5	15	4.75647e+06	32.1707	6.05	3	5	50.53	9.93	4	5	26.99	5.33	3	5	413	44.6207	4.84326
	ENSP00000344762	SRSF3 HGNC Symbol|serine/arginine-rich splicing factor 3 [Source:HGNC Symbol;Acc:10785]|ENSG00000112081|6|ENST00000339436	7	16.1472	1.13204	12.7402	1.11598	2;4;4	2;4;4	10.5788	0.957609	2;4;4	66.13	2	9	49	3.20355e+08	129.423	59.68	5	7	262.27	61.29	8	21	279.55	66.13	9	21	124	14.1942	10.0815
	ENSP00000328484	HIST1H2AJ HGNC (curated)|Histone H2A type 1-J (H2A/e) [Source:UniProtKB/Swiss-Prot;Acc:Q99878]|6|ENSG00000182611|ENST00000333151	1		0.90859		1.11689	-;-;1	-;-;1		1.18502	-;-;1	68.75	6	9	335	1.95513e+09	887.499	35.94	7	75	1145.3	68.75	9	123	1193.39	66.41	8	137	128	13.9278	10.8872
	ENSP00000262193	PSMB1 HGNC Symbol|proteasome (prosome, macropain) subunit, beta type, 1 [Source:HGNC Symbol;Acc:9537]|ENSG00000008018|6|ENST00000262193	6	27.8633	1.089	20.6278	1.11739	1;5;4	1;5;4	19.6657	1.03515	1;5;4	36.51	2	6	40	3.09946e+07	164.45	8.3	2	6	378.047	36.51	6	16	397.579	32.78	5	18	241	26.4724	8.1333
	ENSP00000390823	RHOC HGNC (curated)|Rho-related GTP-binding protein RhoC Precursor (H9) [Source:UniProtKB/Swiss-Prot;Acc:P08134]|1|ENSG00000155366|ENST00000425265	5		1.03343	7.32586	1.11767	-;4;4	-;4;4	24.2233	1.0481	-;4;4	28.04	4	6	23	5.91756e+07					134.651	28.04	5	13	150.016	28.04	6	10	189	21.566	6.58057
	ENSP00000429395	PABPC1 HGNC Symbol|poly(A) binding protein, cytoplasmic 1 [Source:HGNC Symbol;Acc:8554]|ENSG00000070756|8|ENST00000522387	10	11.8765	1.04621	13.3125	1.11788	13;19;19	13;19;19	12.0481	1.01254	13;19;19	29.14	17	16	174	8.11968e+07	635.224	21.19	11	42	811.609	20.36	12	65	1082.55	26.32	14	67	604	67.096	9.53955
	ENSP00000401185	GBAS HGNC Symbol|glioblastoma amplified sequence [Source:HGNC Symbol;Acc:4179]|ENSG00000146729|7|ENST00000437587	2		2.29178	6.00729	1.1185	-;1;2	-;1;2	78.0931	0.661684	-;1;2	33.33	5	2	9	2.90254e+07					31.52	33.33	2	4	47.13	33.33	2	5	81	9.76098	9.86182
	ENSP00000422377	RAI14 HGNC Symbol|retinoic acid induced 14 [Source:HGNC Symbol;Acc:14873]|ENSG00000039560|5|ENST00000512629	4		0.820059	17.7645	1.11935	-;2;3	-;2;3	1.9684	1.18853	-;2;3	7.26	5	4	8	5.75624e+06					33.51	1.47	1	2	87.3233	7.26	4	6	951	106.839	5.97314
	ENSP00000405299	PTGES3 HGNC Symbol|prostaglandin E synthase 3 (cytosolic) [Source:HGNC Symbol;Acc:16049]|ENSG00000110958|12|ENST00000414274	3		1.24093	12.9889	1.11998	-;2;5	-;2;5	25.7597	0.88022	-;2;5	16.92	4	3	15	4.9606e+07					99.1171	11.54	2	5	223.884	16.92	3	10	130	14.9489	4.76709
	ENSP00000296402	CAMK2D HGNC Symbol|calcium/calmodulin-dependent protein kinase II delta [Source:HGNC Symbol;Acc:1462]|ENSG00000145349|4|ENST00000296402	7	14.6327	1.02005	2.09735	1.12072	7;5;6	7;5;6	2.29887	1.00768	7;5;6	25.31	38	8	46	1.397e+07	101.434	13.39	5	17	82.1	13.39	5	13	118.121	21.13	7	16	478	54.0935	7.25439
	ENSP00000402338	RPF2 HGNC Symbol|ribosome production factor 2 homolog (S. cerevisiae) [Source:HGNC Symbol;Acc:20870]|ENSG00000197498|6|ENST00000441448	6	17.7376	1.25602	13.0957	1.12095	2;3;2	2;3;2	22.5666	0.86535	2;3;2	18.63	3	6	18	7.93979e+06	17.04	12.75	4	6	69.3845	10.13	4	7	48.3459	6.86	3	5	306	35.5602	9.99365
	ENSP00000005257	RALA HGNC Symbol|v-ral simian leukemia viral oncogene homolog A (ras related) [Source:HGNC Symbol;Acc:9839]|ENSG00000006451|7|ENST00000005257	5	53.2791	1.60855	28.6098	1.12115	4;5;5	4;5;5	12.7144	0.745791	4;5;5	43.69	3	9	57	5.23957e+07	160.465	35.44	6	12	387.772	41.26	8	25	488.998	43.69	8	20	206	23.552	7.10791
	ENSP00000391471	P4HB HGNC Symbol|prolyl 4-hydroxylase, beta polypeptide [Source:HGNC Symbol;Acc:8548]|ENSG00000185624|17|ENST00000436463	8	2.90239	1.18591	1.61679	1.12394	46;55;57	46;55;57	3.27848	0.880868	46;55;57	21.95	5	8	421	4.45673e+08	2900.33	21.95	8	138	2760.37	21.95	8	139	2868.66	21.95	8	144	492	55.3607	4.81787
	ENSP00000406747	YWHAH HGNC (curated)|14-3-3 protein eta (Protein AS1) [Source:UniProtKB/Swiss-Prot;Acc:Q04917]|22|ENSG00000128245|ENST00000420430	1		1.02074	0.169047	1.12395	-;2;2	-;2;2	22.4484	1.09184	-;2;2	33.33	2	2	55	1.6389e+08	291.411	8.64	1	9	455.684	33.33	2	18	766.633	33.33	2	28	162	18.6636	7.28369
	ENSP00000216962	PYGB HGNC Symbol|phosphorylase, glycogen; brain [Source:HGNC Symbol;Acc:9723]|20|ENSG00000100994|ENST00000216962	16	26.7589	1.12557	31.9951	1.124	7;4;7	7;4;7	17.5105	1.03821	7;4;7	18.39	10	16	54	1.51442e+07	113.665	12.69	12	19	85.36	8.9	8	13	146.883	14	12	22	843	96.6345	6.85889
	ENSP00000364142	HP1BP3 HGNC (curated)|Heterochromatin protein 1-binding protein 3 (Protein HP1-BP74) [Source:UniProtKB/Swiss-Prot;Acc:Q5SSJ5]|1|ENSG00000127483|ENST00000375003	12	43.5673	1.02024	36.3932	1.12413	39;33;35	39;33;35	6.89809	1.06117	39;33;35	41.65	6	13	251	5.64925e+07	1041.73	38.15	11	89	759.355	37.41	11	75	1137.67	40.9	12	87	401	44.4069	10.0962
	ENSP00000238688	C14orf156 HGNC Symbol|chromosome 14 open reading frame 156 [Source:HGNC Symbol;Acc:20495]|ENSG00000119705|14|ENST00000238688	5		1.47244	23.6395	1.1256	-;1;1	-;1;1	5.21438	0.743758	-;1;1	72.48	9	5	10	1.84395e+07					72.62	40.37	3	4	70.3067	72.48	5	6	109	12.3414	10.2427
	ENSP00000305675	SDPR HGNC Symbol|serum deprivation response [Source:HGNC Symbol;Acc:10690]|ENSG00000168497|2|ENST00000304141	11	10.6996	0.927675	6.7115	1.1259	14;19;22	14;19;22	10.1224	1.17598	14;19;22	36.47	1	11	202	3.15995e+07	650.353	24.71	8	50	740.388	25.18	8	71	960.896	36.47	11	81	425	47.1446	5.21143
	ENSP00000386449	MKI67IP HGNC Symbol|MKI67 (FHA domain) interacting nucleolar phosphoprotein [Source:HGNC Symbol;Acc:17838]|ENSG00000155438|2|ENST00000409201	2		1.12602	14.4751	1.12593	-;1;1	-;1;1	16.2217	0.989914	-;1;1	15.08	4	2	6	7.50787e+06					33.5467	3.52	1	3	37.5767	15.08	2	3	199	23.4774	9.80322
	ENSP00000357621	HDAC2 HGNC Symbol|histone deacetylase 2 [Source:HGNC Symbol;Acc:4853]|ENSG00000196591|6|ENST00000368632	3	40.3608	1.17907	33.8579	1.12593	4;1;4	4;1;4	13.9625	0.988612	4;1;4	24.67	13	7	44	3.31215e+07	146.643	24.67	7	16	97.935	10.48	4	11	107.81	18.56	6	17	458	51.9653	5.74463
	ENSP00000348965	DYNC1H1 HGNC (automatic)|Cytoplasmic dynein 1 heavy chain 1 (Cytoplasmic dynein heavy chain 1)(Dynein heavy chain, cytosolic) [Source:UniProtKB/Swiss-Prot;Acc:Q14204]|14|ENSG00000197102|ENST00000360184	98	21.6819	0.870212	33.0314	1.12725	34;49;36	34;49;36	10.1575	1.22509	34;49;36	30.26	4	102	496	1.0882e+08	2011.06	21.52	72	126	2290.82	27.57	92	199	2267.04	26.52	87	171	4646	532.072	6.40479
	ENSP00000449854	RPLP0 HGNC Symbol|ribosomal protein, large, P0 [Source:HGNC Symbol;Acc:10371]|12|ENSG00000089157|ENST00000547211	7	17.4682	1.18447	14.6089	1.12815	17;18;18	17;18;18	7.10837	0.952679	17;18;18	53.28	13	7	160	2.4481e+08	343.45	53.28	7	40	711.328	53.28	7	55	977.317	53.28	7	65	244	26.8842	8.96826
	ENSP00000373918	GARS HGNC (curated)|Glycyl-tRNA synthetase (EC 6.1.1.14)(Glycine--tRNA ligase)(GlyRS) [Source:UniProtKB/Swiss-Prot;Acc:P41250]|7|ENSG00000106105|ENST00000389266	11	28.2088	0.979401	28.1629	1.1283	9;10;12	9;10;12	13.1963	1.12466	9;10;12	23.41	1	11	98	2.63447e+07	389.34	17.05	9	29	480.685	15.29	8	32	578.758	23.41	11	37	739	83.1126	7.03467
	ENSP00000373811	CCT8 HGNC Symbol|chaperonin containing TCP1, subunit 8 (theta) [Source:HGNC Symbol;Acc:1623]|ENSG00000156261|21|ENST00000389159	8	34.3992	1.16786	33.7358	1.12907	13;15;20	13;15;20	10.8223	0.957901	13;15;20	24.5	5	8	146	4.91708e+07	754.01	23.03	7	43	874.032	17.92	6	47	1031.54	24.5	8	56	547	59.4404	5.78271
	ENSP00000261700	C14orf166 HGNC Symbol|chromosome 14 open reading frame 166 [Source:HGNC Symbol;Acc:23169]|ENSG00000087302|14|ENST00000261700	8		1.06454	3.3673	1.12913	-;4;8	-;4;8	2.51008	1.02226	-;4;8	40.98	4	8	23	2.50635e+07					157.807	33.61	6	9	258.792	40.98	8	14	244	28.0507	6.65381
	ENSP00000307940	EEF2 HGNC (automatic)|Elongation factor 2 (EF-2) [Source:UniProtKB/Swiss-Prot;Acc:P13639]|19|ENSG00000167658|ENST00000309311	26	35.7274	1.15753	33.6288	1.12995	63;75;77	63;75;77	12.4833	0.926538	63;75;77	53.5	2	27	617	2.1734e+08	3290.94	50.7	25	182	3476.41	46.62	24	207	3854.28	49.42	25	228	858	95.277	6.82959
	ENSP00000362807	PEF1 HGNC Symbol|penta-EF-hand domain containing 1 [Source:HGNC Symbol;Acc:30009]|ENSG00000162517|1|ENST00000373703	3		0.987181		1.13003	-;-;1	-;-;1		1.10351	-;-;1	11.97	1	3	5	8.2425e+06					51.05	3.52	1	1	154.45	11.97	3	4	284	30.3613	6.53662
	ENSP00000263273	NUCB1 HGNC Symbol|nucleobindin 1 [Source:HGNC Symbol;Acc:8043]|ENSG00000104805|19|ENST00000263273	16	24.8049	0.879603	32.8718	1.13033	2;7;6	2;7;6	16.618	1.24517	2;7;6	42.73	6	18	85	2.45136e+07	94.55	18.87	8	13	354.867	37.31	17	36	590.895	42.73	18	36	461	53.8463	5.24951
	ENSP00000241600	MRPS2 HGNC Symbol|mitochondrial ribosomal protein S2 [Source:HGNC Symbol;Acc:14495]|ENSG00000122140|9|ENST00000241600	7		1.12494	7.29355	1.13053	-;1;1	-;1;1	14.4519	0.985977	-;1;1	31.08	2	8	14	1.53226e+07					82.6319	20.95	6	7	106.952	25.34	7	7	296	33.2281	9.26123
	ENSP00000364119	EIF2S2 HGNC Symbol|eukaryotic translation initiation factor 2, subunit 2 beta, 38kDa [Source:HGNC Symbol;Acc:3266]|ENSG00000125977|20|ENST00000374980	9	23.4358	1.04692	27.1642	1.13097	8;13;15	8;13;15	12.8969	1.10204	8;13;15	31.53	1	9	83	3.93551e+07	273.168	29.73	8	21	417.365	31.53	9	30	392.201	31.53	9	32	333	38.3644	5.79541
	ENSP00000378278	GNL3 HGNC Symbol|guanine nucleotide binding protein-like 3 (nucleolar) [Source:HGNC Symbol;Acc:29931]|ENSG00000163938|3|ENST00000394799	3		1.46146		1.13389	-;-;2	-;-;2		0.747937	-;-;2	8.01	5	4	6	6.96254e+06									43.7033	8.01	4	6	537	60.5025	8.79248
	ENSP00000348877	GPI HGNC Symbol|glucose-6-phosphate isomerase [Source:HGNC Symbol;Acc:4458]|ENSG00000105220|19|ENST00000356487	11	25.6612	0.789532	12.6218	1.13424	21;15;28	21;15;28	23.2015	1.50647	21;15;28	27.24	3	12	161	1.10328e+08	827.494	21.86	11	57	750.861	21.86	11	44	1132.54	27.24	12	60	558	63.1072	8.32373
	ENSP00000267884	SRP14 HGNC Symbol|signal recognition particle 14kDa (homologous Alu RNA binding protein) [Source:HGNC Symbol;Acc:11299]|ENSG00000140319|15|ENST00000267884	4		1.41373	8.27034	1.13481	-;3;3	-;3;3	16.7658	0.812206	-;3;3	49.26	2	4	16	9.40978e+06					51.3233	11.03	2	4	52.6367	49.26	4	12	136	14.5608	10.0376
	ENSP00000336579	PYCR1 HGNC Symbol|pyrroline-5-carboxylate reductase 1 [Source:HGNC Symbol;Acc:9721]|ENSG00000183010|17|ENST00000337943	3		1.79245	3.51432	1.13502	-;1;1	-;1;1	15.6887	0.620893	-;1;1	23.1	5	5	17	3.1417e+07	78.08	4.11	1	3	174.49	23.1	5	6	219.35	23.1	5	8	316	33.3195	6.80029
	ENSP00000273258	ARL6IP5 HGNC (curated)|PRA1 family protein 3 (ADP-ribosylation factor-like protein 6-interacting protein 5)(ARL-6-interacting protein 5)(Aip-5)(Glutamate transporter EAAC1-interacting protein)(GTRAP3-18)(Prenylated Rab acceptor protein 2)(Protein JWa)(Dermal papilla-derived protein 11)(JM5)(Putative MAPK-activating protein PM27)(Cytoskeleton-related vitamin A-responsive protein) [Source:UniProtKB…	6	24.682	0.702273	32.517	1.13669	2;2;3	2;2;3	11.0744	1.58097	2;2;3	38.3	5	6	44	1.75451e+08	224.843	38.3	6	14	210.106	38.3	6	16	156.908	38.3	6	14	188	21.6004	9.77393
	ENSP00000380306	SEC13 HGNC Symbol|SEC13 homolog (S. cerevisiae) [Source:HGNC Symbol;Acc:10697]|ENSG00000157020|3|ENST00000397117	4		1.01127		1.13772	-;-;1	-;-;1		1.08455	-;-;1	24.3	9	4	24	2.69816e+07	83.65	21.48	3	5	144.44	24.3	4	8	279.61	24.3	4	11	284	31.5753	5.8208
	ENSP00000233627	NDUFS7 HGNC Symbol|NADH dehydrogenase (ubiquinone) Fe-S protein 7, 20kDa (NADH-coenzyme Q reductase) [Source:HGNC Symbol;Acc:7714]|ENSG00000115286|19|ENST00000233627	4		1.18431	4.60159	1.13905	-;3;4	-;3;4	12.9146	0.928416	-;3;4	19.25	9	4	13	1.01879e+07					34.58	11.74	3	6	135.11	19.25	4	7	213	23.5481	9.99365
	ENSP00000245539	MRPS7 HGNC Symbol|mitochondrial ribosomal protein S7 [Source:HGNC Symbol;Acc:14499]|ENSG00000125445|17|ENST00000245539	3		1.48391		1.13945	-;-;1	-;-;1		0.74024	-;-;1	12.4	1	3	5	7.31093e+06					38.9056	7.44	2	2	50.3308	12.4	3	3	242	28.116	9.99365
	ENSP00000359645	RBMX HGNC Symbol|RNA binding motif protein, X-linked [Source:HGNC Symbol;Acc:9910]|ENSG00000147274|X|ENST00000320676	22	38.3226	1.15299	34.8382	1.13962	4;21;27	4;21;27	9.11079	1.0042	4;21;27	61.13	11	24	266	4.70971e+07	295.921	45.52	17	45	1129.01	55.24	21	107	1341.87	57.29	22	114	391	42.3063	10.0522
	ENSP00000391190	TGOLN2 HGNC Symbol|trans-golgi network protein 2 [Source:HGNC Symbol;Acc:15450]|2|ENSG00000152291|ENST00000444342	1	45.1087	0.828248	43.6938	1.14002	1;2;-	1;2;-		1.37811	1;2;-	5.82	6	3	16	2.47066e+07	29.65	5.82	3	7	49.85	5.82	3	9					447	47.0301	5.5542
	ENSP00000022615	VDAC3 HGNC (automatic)|Voltage-dependent anion-selective channel protein 3 (VDAC-3)(hVDAC3)(Outer mitochondrial membrane protein porin 3) [Source:UniProtKB/Swiss-Prot;Acc:Q9Y277]|8|ENSG00000078668|ENST00000022615	1	22.4402	1.35231	16.0601	1.14219	2;2;-	2;2;-		0.847961	2;2;-	4.24	3	1	4	2.03163e+07	79.41	4.24	1	2	80.98	4.24	1	2					283	30.6393	8.66064
	ENSP00000414499	PSMD4 HGNC Symbol|proteasome (prosome, macropain) 26S subunit, non-ATPase, 4 [Source:HGNC Symbol;Acc:9561]|ENSG00000159352|1|ENST00000437736	3		1.13392	4.58288	1.1428	-;5;6	-;5;6	12.7549	0.80663	-;5;6	27.59	3	4	19	1.77894e+07					81.6071	23.65	3	9	82.1643	27.59	4	10	203	21.7694	7.10791
	ENSP00000310670	KIAA1967 HGNC Symbol|KIAA1967 [Source:HGNC Symbol;Acc:23360]|ENSG00000158941|8|ENST00000308511	21	58.0262	1.20383	40.8356	1.14301	10;9;10	10;9;10	5.35943	0.974373	10;9;10	28.82	18	21	124	6.07814e+07	378.615	21.78	15	39	494.777	19.39	15	41	445.858	22.86	17	44	923	102.838	5.22412
	ENSP00000339063	EEF1A1 HGNC (curated)|Elongation factor 1-alpha 1 (EF-1-alpha-1)(Elongation factor 1 A-1)(eEF1A-1)(Elongation factor Tu)(EF-Tu)(Leukocyte receptor cluster member 7) [Source:UniProtKB/Swiss-Prot;Acc:P68104]|6|ENSG00000156508|ENST00000316292	4	35.7124	1.10404	36.8291	1.14383	17;25;22	17;26;22	12.755	0.974587	17;25;22	55.84	6	8	840	5.34003e+08	1145.66	48.92	7	201	1161.72	47.84	7	310	1444.18	39.61	6	329	462	50.1091	9.01221
	ENSP00000415973	RALY HGNC Symbol|RNA binding protein, autoantigenic (hnRNP-associated with lethal yellow homolog (mouse)) [Source:HGNC Symbol;Acc:15921]|ENSG00000125970|20|ENST00000442805	11	43.6164	1.12906	38.4166	1.14422	29;24;26	29;24;26	5.92336	1.00536	29;24;26	74.68	6	12	204	1.1921e+08	775.521	55.27	10	60	809.685	56.54	10	69	966.532	74.68	12	75	237	24.6503	10.4917
	ENSP00000296255	RPN1 HGNC (curated)|Dolichyl-diphosphooligosaccharide--protein glycosyltransferase subunit 1 Precursor (EC 2.4.1.119)(Dolichyl-diphosphooligosaccharide--protein glycosyltransferase 67 kDa subunit)(Ribophorin-1)(Ribophorin I)(RPN-I) [Source:UniProtKB/Swiss-Prot;Acc:P04843]|3|ENSG00000163902|ENST00000296255	19	16.3962	1.00233	9.73186	1.145	29;27;26	29;27;26	8.0258	1.12919	29;27;26	48.6	5	19	273	1.25794e+08	1470.56	45.96	18	94	1344.69	43.33	16	92	1051.95	40.86	16	87	607	68.5268	6.37939
	ENSP00000299300	CCT2 HGNC Symbol|chaperonin containing TCP1, subunit 2 (beta) [Source:HGNC Symbol;Acc:1615]|ENSG00000166226|12|ENST00000299300	20	32.4217	1.23479	29.3605	1.1451	25;20;27	25;20;27	9.70219	0.903702	25;20;27	69.16	4	21	266	1.30965e+08	1936.01	64.11	19	91	1682.48	55.51	18	77	2342.24	64.11	19	98	535	57.4521	6.45557
	ENSP00000381717	UBE2D2 HGNC Symbol|ubiquitin-conjugating enzyme E2D 2 [Source:HGNC Symbol;Acc:12475]|5|ENSG00000131508|ENST00000398733	1		1.32497	0.0631022	1.14652	-;2;2	-;2;2	27.0809	0.868216	-;2;2	19.05	7	2	8	1.2809e+07					70.5233	19.05	2	4	82.23	19.05	2	4	147	16.7244	7.82568
	ENSP00000263694	SNRNP40 HGNC Symbol|small nuclear ribonucleoprotein 40kDa (U5) [Source:HGNC Symbol;Acc:30857]|ENSG00000060688|1|ENST00000263694	5	19.7901	1.42732		1.14698	5;-;1	5;-;1	9.20182	0.797483	5;-;1	27.17	3	5	27	1.949e+07	180.611	27.17	5	13	111.78	10.64	2	5	142.953	21.01	3	9	357	39.2857	8.104
	ENSP00000263168	CAPZA1 HGNC Symbol|capping protein (actin filament) muscle Z-line, alpha 1 [Source:HGNC Symbol;Acc:1488]|ENSG00000116489|1|ENST00000263168	6	21.7517	1.05738	21.8485	1.14732	10;12;12	10;12;12	11.2455	1.05404	10;12;12	42.31	1	9	111	8.81996e+07	397.908	28.67	7	32	455.581	28.67	7	34	669.366	42.31	9	45	286	32.9023	5.69385
	ENSP00000369127	DNAJA1 HGNC Symbol|DnaJ (Hsp40) homolog, subfamily A, member 1 [Source:HGNC Symbol;Acc:5229]|ENSG00000086061|9|ENST00000330899	9	24.2823	1.1562	28.3643	1.14761	7;5;4	7;5;4	1.2337	0.95211	7;5;4	38.54	3	9	37	1.48152e+07	158.537	31.23	8	16	106.27	29.97	8	13	50.66	22.67	6	8	397	44.8395	7.07861
	ENSP00000451391	SRSF5 HGNC Symbol|serine/arginine-rich splicing factor 5 [Source:HGNC Symbol;Acc:10787]|14|ENSG00000100650|ENST00000553635	4	16.1475	1.09872	16.6742	1.14824	2;3;4	2;3;4	2.79584	1.04418	2;3;4	17.84	5	6	38	1.16104e+08	162.451	12.64	4	9	267.707	17.84	6	17	189.08	16.73	5	12	269	30.8401	11.6636
	ENSP00000261366	LMNB1 HGNC Symbol|lamin B1 [Source:HGNC Symbol;Acc:6637]|ENSG00000113368|5|ENST00000261366	25	40.6618	1.08084	32.2691	1.14846	62;44;63	62;44;63	9.63157	1.0315	62;44;63	51.19	2	29	537	2.42815e+08	3434.31	51.19	29	178	2965.77	50.34	26	162	3887.04	48.46	27	197	586	66.3676	5.16064
	ENSP00000340689	GLS HGNC Symbol|glutaminase [Source:HGNC Symbol;Acc:4331]|ENSG00000115419|2|ENST00000338435	7	13.32	0.986325	7.05277	1.14896	6;6;5	6;6;5	10.0453	1.13411	6;6;5	20.74	14	8	56	3.43489e+07	94.1438	12.71	6	19	78.0428	20.74	8	18	93.1817	14.88	7	19	598	65.4179	7.88428
	ENSP00000322175	AK4 HGNC Symbol|adenylate kinase 4 [Source:HGNC Symbol;Acc:363]|ENSG00000162433|1|ENST00000327299	8		0.754392	60.0312	1.14967	-;2;1	-;2;1	11.002	1.43343	-;2;1	60.99	2	9	24	4.76209e+07					106.41	60.99	8	10	152.592	57.85	8	14	223	25.2522	8.39697
	ENSP00000455701	CYB5B HGNC Symbol|cytochrome b5 type B (outer mitochondrial membrane) [Source:HGNC Symbol;Acc:24374]|16|ENSG00000103018|ENST00000514123	3		1.0959	5.01546	1.15035	-;4;4	-;4;4	24.1412	1.03769	-;4;4	48.78	5	4	32	5.28748e+07	36.37	33.33	2	4	207.455	48.78	4	12	319.366	48.78	4	16	123	13.8009	5.14795
	ENSP00000395616	PRKCSH HGNC Symbol|protein kinase C substrate 80K-H [Source:HGNC Symbol;Acc:9411]|ENSG00000130175|19|ENST00000412601	8	24.4346	1.04909	17.2018	1.15127	9;21;24	9;21;24	3.42646	1.08047	9;21;24	24.95	2	9	144	1.20994e+08	336.737	24.95	9	29	926.747	23.81	8	56	1109.51	23.81	8	59	525	59.1407	4.42432
	ENSP00P02769	MGI (curated)|Serum albumin OS=Bos taurus GN=ALB PE=1 SV=4 - [ALBU_BOVIN]	14	35.3952	1.07215	17.0579	1.15203	87;99;100	88;100;100	22.8877	1.00694	87;99;101	21.58	1	14	1228	5.9301e+09	8055.32	21.58	14	402	8451.31	21.58	13	429	8573.09	21.58	13	397	607	69.2484	6.17627
	ENSP00000386045	ESYT1 HGNC (automatic)|Extended synaptotagmin-1 (E-Syt1)(Membrane-bound C2 domain-containing protein)(Protein FAM62A) [Source:UniProtKB/Swiss-Prot;Acc:Q9BSJ8]|12|ENSG00000139641|ENST00000402331	25	12.869	0.793529	15.9944	1.15259	27;17;31	27;17;31	4.75023	1.39431	27;17;31	34.31	4	25	253	9.28524e+07	1306.23	26.94	21	85	1012.1	26.94	21	74	1483.42	33.65	24	94	1058	117.32	5.89697
	ENSP00000225696	NUP88 HGNC Symbol|nucleoporin 88kDa [Source:HGNC Symbol;Acc:8067]|ENSG00000108559|17|ENST00000225696	4	16.2212	1.03693	20.7014	1.15393	1;1;1	1;1;1	9.03623	1.09457	1;1;1	6.75	2	4	15	9.17698e+06	68.64	6.75	4	6	51.7033	5.94	3	3	75.54	6.75	4	6	741	83.4888	5.69385
	ENSP00000358635	SYNCRIP HGNC Symbol|synaptotagmin binding, cytoplasmic RNA interacting protein [Source:HGNC Symbol;Acc:16918]|ENSG00000135316|6|ENST00000369622	7	8.11371	1.12353	4.54123	1.15399	16;17;20	16;17;20	10.0951	1.05449	16;17;20	27.45	3	10	217	1.4009e+08	1024.78	23.76	9	63	928.99	23.76	9	69	1131.95	27.45	10	85	623	69.5596	8.5874
	ENSP00000408695	PRKCA HGNC Symbol|protein kinase C, alpha [Source:HGNC Symbol;Acc:9393]|17|ENSG00000154229|ENST00000413366	3	13.8501	1.24337		1.15446	1;-;2	1;-;2	5.95092	0.915886	1;-;2	4.32	11	4	13	7.13189e+06	0	1.49	2	4	25.56	2.98	3	4	28.9409	2.08	2	5	672	76.7001	7.04932
	ENSP00000413979	TBL2 HGNC Symbol|transducin (beta)-like 2 [Source:HGNC Symbol;Acc:11586]|ENSG00000106638|7|ENST00000432538	6	13.5082	0.998622	9.01918	1.15588	2;1;2	2;1;2	13.5643	1.15257	2;1;2	21.65	6	6	42	1.49901e+07	267.254	21.65	6	15	171.949	16.55	5	11	269.045	16.55	5	16	411	45.9062	9.48096
	ENSP00000236040	LEPRE1 HGNC Symbol|leucine proline-enriched proteoglycan (leprecan) 1 [Source:HGNC Symbol;Acc:19316]|ENSG00000117385|1|ENST00000236040	13	10.1804	1.37752	4.77079	1.15605	6;5;3	6;5;3	5.63113	0.91749	6;5;3	26.49	7	14	90	3.0892e+07	581.723	23.76	12	27	510.598	19.4	11	32	637.708	20.77	10	31	804	90.5588	5.70654
	ENSP00000386245	PPIG HGNC Symbol|peptidylprolyl isomerase G (cyclophilin G) [Source:HGNC Symbol;Acc:14650]|ENSG00000138398|2|ENST00000409714	3		1.21857		1.15651	2;-;-	2;-;-		0.975527	2;-;-	12.99	5	8	18	2.84947e+07	22.12	5.01	4	8	56.46	2.57	2	2	28.49	7.58	4	8	739	87.0365	10.3013
	ENSP00000413548	XRN2 HGNC Symbol|5'-3' exoribonuclease 2 [Source:HGNC Symbol;Acc:12836]|ENSG00000088930|20|ENST00000430571	8		1.08415		1.15765	1;-;-	1;-;-		1.09756	1;-;-	15.33	3	12	59	2.97351e+07	327.655	9.84	7	15	227.115	7.89	8	19	307.564	9.38	7	25	874	99.8981	8.01611
	ENSP00000375798	SNRPD2 HGNC Symbol|small nuclear ribonucleoprotein D2 polypeptide 16.5kDa [Source:HGNC Symbol;Acc:11159]|ENSG00000125743|19|ENST00000391932	5		1.20227	0.354751	1.15782	-;5;5	-;5;5	11.0692	0.903382	-;5;5	57.41	2	5	28	2.58649e+07					52.3601	57.41	5	10	63.1335	57.41	5	18	108	12.3906	9.89111
	ENSP00000385269	ELAVL1 HGNC Symbol|ELAV (embryonic lethal, abnormal vision, Drosophila)-like 1 (Hu antigen R) [Source:HGNC Symbol;Acc:3312]|ENSG00000066044|19|ENST00000407627	11	9.15941	1.2204	12.44	1.15822	6;7;13	6;7;13	11.4168	0.969111	6;7;13	47.55	2	11	134	9.87201e+07	421.805	30.98	8	40	694.937	47.55	11	41	882.975	38.34	10	53	326	36.0692	9.17334
	ENSP00000365158	UGCGL1 HGNC (curated)|UDP-glucose:glycoprotein glucosyltransferase 1 Precursor (EC 2.4.1.-)(UDP-glucose ceramide glucosyltransferase-like 1)(UDP--Glc:glycoprotein glucosyltransferase)(HUGT1) [Source:UniProtKB/Swiss-Prot;Acc:Q9NYU2]|2|ENSG00000136731|ENST00000375990	20	12.7633	1.00403	7.91236	1.15866	10;10;6	10;10;6	8.86366	1.13502	10;10;6	20.71	2	20	98	4.59397e+07	409.094	13.78	15	37	443.429	18.22	18	33	292.99	16.46	17	28	1531	174.867	5.60498
	ENSP00000273308	CNPY2 HGNC Symbol|canopy 2 homolog (zebrafish) [Source:HGNC Symbol;Acc:13529]|ENSG00000144785|12|ENST00000273308	6		1.15514	25.7719	1.16086	-;1;1	-;1;1	11.7283	0.962612	-;1;1	41.21	6	6	14	2.46429e+07					132.24	30.22	4	7	152.9	33.52	5	7	182	20.6392	4.91943
	ENSP00000316042	HNRNPA0 HGNC Symbol|heterogeneous nuclear ribonucleoprotein A0 [Source:HGNC Symbol;Acc:5030]|ENSG00000177733|5|ENST00000314940	4	19.4471	1.00061	27.4807	1.16107	9;13;12	9;13;12	14.9401	1.15914	9;13;12	34.43	1	4	63	5.56633e+07	103.926	23.61	3	16	329.14	23.61	3	25	383.35	27.21	3	22	305	30.8218	9.29053
	ENSP00000291577	C21orf33 HGNC Symbol|chromosome 21 open reading frame 33 [Source:HGNC Symbol;Acc:1273]|ENSG00000160221|21|ENST00000291577	3		0.755184	42.8931	1.16165	-;2;3	-;2;3	37.9385	1.47112	-;2;3	26.87	6	4	11	2.16396e+07					94.3258	15.3	3	4	89.6967	24.63	3	7	268	28.1527	8.26514
	ENSP00000375865	COPS8 HGNC Symbol|COP9 constitutive photomorphogenic homolog subunit 8 (Arabidopsis) [Source:HGNC Symbol;Acc:24335]|2|ENSG00000198612|ENST00000392008	2		1.59022		1.16183	-;1;-	-;1;-		0.707341	-;1;-	16.25	4	2	2	9.9596e+06					25.19	16.25	2	2					160	17.8983	7.25439
	ENSP00000230048	ACOT13 HGNC Symbol|acyl-CoA thioesterase 13 [Source:HGNC Symbol;Acc:20999]|ENSG00000112304|6|ENST00000230048	2		1.29382	9.13999	1.16453	-;2;2	-;2;2	12.721	0.881437	-;2;2	12.14	2	2	9	9.38735e+06					60.2033	12.14	2	5	42.45	12.14	2	4	140	14.9509	9.14404
	ENSP00000216181	MYH9 HGNC (curated)|Myosin-9 (Myosin heavy chain 9)(Myosin heavy chain, non-muscle IIa)(Non-muscle myosin heavy chain IIa)(NMMHC II-a)(NMMHC-IIA)(Cellular myosin heavy chain, type A)(Non-muscle myosin heavy chain A)(NMMHC-A) [Source:UniProtKB/Swiss-Prot;Acc:P35579]|22|ENSG00000100345|ENST00000216181	77	14.3258	0.947626	4.43201	1.16453	211;276;259	211;278;259	23.1069	1.26075	211;277;260	64.69	15	90	2716	9.23351e+08	11974	63.27	84	760	15846.7	62.91	84	1026	15953.5	60.66	84	930	1960	226.392	5.60498
	ENSP00000221801	FBL HGNC Symbol|fibrillarin [Source:HGNC Symbol;Acc:3599]|ENSG00000105202|19|ENST00000221801	11	25.2665	1.17277	21.2272	1.16461	28;30;33	28;30;33	9.26127	0.978969	28;30;33	36.45	1	11	250	1.05084e+08	477.08	36.45	11	73	580.706	36.45	11	83	715.256	36.45	11	94	321	33.7634	10.1841
	ENSP00000254193	SNRPA1 HGNC Symbol|small nuclear ribonucleoprotein polypeptide A' [Source:HGNC Symbol;Acc:11152]|ENSG00000131876|15|ENST00000254193	10		1.02088	2.44085	1.16488	-;11;10	-;11;10	10.7306	1.0825	-;11;10	53.73	4	12	72	2.07105e+08					299.811	49.02	10	21	378.331	49.41	11	51	255	28.3981	8.6167
	ENSP00000301785	HNRNPUL2 HGNC Symbol|heterogeneous nuclear ribonucleoprotein U-like 2 [Source:HGNC Symbol;Acc:25451]|ENSG00000214753|11|ENST00000301785	20	41.6129	1.00359	40.4094	1.16702	28;19;24	28;19;24	5.73847	1.18677	28;19;25	33.47	2	21	258	1.21356e+08	1530.2	33.47	21	93	1412.4	27.44	18	82	1501.03	28.78	19	83	747	85.0522	4.90674
	ENSP00000222969	BUD31 HGNC Symbol|BUD31 homolog (S. cerevisiae) [Source:HGNC Symbol;Acc:29629]|ENSG00000106245|7|ENST00000222969	4		1.21346	2.73025	1.16793	-;3;1	-;3;1	10.2362	0.935856	-;3;1	29.86	12	5	44	2.93219e+07	17.08	10.42	2	11	91.8742	29.86	5	20	50.2967	15.28	3	13	144	16.9886	8.82178
	ENSP00000263383	ILVBL HGNC (automatic)|Acetolactate synthase-like protein (EC 2.2.1.-)(IlvB-like protein) [Source:UniProtKB/Swiss-Prot;Acc:A1L0T0]|19|ENSG00000105135|ENST00000263383	4	19.2096	0.847252	48.9391	1.16872	1;2;2	1;2;2	32.7852	1.32308	1;2;2	9.65	1	5	29	2.34926e+07	43.2	6.8	4	9	46.8539	9.65	5	9	42.9299	9.65	5	11	632	67.8248	8.14795
	ENSP00000339521	RSU1 HGNC Symbol|Ras suppressor protein 1 [Source:HGNC Symbol;Acc:10464]|ENSG00000148484|10|ENST00000345264	3		0.758376	62.8415	1.16948	-;1;2	-;1;2	11.2538	1.55397	-;1;2	9.39	3	3	9	9.98658e+06					80.6284	9.39	3	5	58.0117	9.39	3	4	277	31.5207	8.646
	ENSP00000258091	CCT7 HGNC Symbol|chaperonin containing TCP1, subunit 7 (eta) [Source:HGNC Symbol;Acc:1622]|ENSG00000135624|2|ENST00000258091	10	36.2012	1.40277	33.9432	1.17021	6;7;5	6;7;5	11.9048	0.819783	6;7;5	30.2	8	10	84	3.02295e+07	466.968	22.1	8	28	551.67	26.89	9	28	510.078	25.41	9	28	543	59.3289	7.6499
	ENSP00000370517	PFKP HGNC (curated)|6-phosphofructokinase type C (EC 2.7.1.11)(Phosphofructokinase 1)(Phosphohexokinase)(Phosphofructo-1-kinase isozyme C)(PFK-C)(6-phosphofructokinase, platelet type) [Source:UniProtKB/Swiss-Prot;Acc:Q01813]|10|ENSG00000067057|ENST00000381125	20	28.312	1.00634	23.2657	1.17042	32;31;35	32;31;35	20.2777	1.12635	32;31;35	44.9	9	23	381	7.72344e+07	2287.99	38.01	21	120	2029.08	42.47	22	123	2610.47	40.56	22	138	784	85.5415	7.54736
	ENSP00000303145	TMED10 HGNC (automatic)|Transmembrane emp24 domain-containing protein 10 Precursor (21 kDa transmembrane-trafficking protein)(Transmembrane protein Tmp21)(Tmp-21-I)(p24delta)(S31III125)(S31I125) [Source:UniProtKB/Swiss-Prot;Acc:P49755]|14|ENSG00000170348|ENST00000303575	3	7.96191	0.960459	13.5182	1.17064	2;4;4	2;4;4	8.55251	1.25009	2;4;4	31.51	1	3	33	3.12664e+07	189.361	25.11	2	12	157.574	8.68	1	9	185.34	15.07	2	12	219	24.96	7.44482
	ENSP00000441355	SH3GLB1 HGNC Symbol|SH3-domain GRB2-like endophilin B1 [Source:HGNC Symbol;Acc:10833]|ENSG00000097033|1|ENST00000535010	5		0.874044	15.7895	1.17065	-;2;1	-;2;1	18.4602	1.29722	-;2;1	20.75	3	5	16	8.57065e+06					68.62	9.43	3	5	146.816	20.75	5	11	265	29.2998	6.3667
	ENSP00000320204	IGF2BP2 HGNC Symbol|insulin-like growth factor 2 mRNA binding protein 2 [Source:HGNC Symbol;Acc:28867]|ENSG00000073792|3|ENST00000346192	9	6.53508	0.901471	4.17545	1.17147	4;6;7	4;6;7	5.74447	1.32292	4;6;7	38.31	4	13	200	6.81763e+07	574.598	25.9	9	54	537.918	38.31	13	66	901.389	35.07	11	80	556	61.8043	8.25049
	ENSP00000355890	EPRS HGNC Symbol|glutamyl-prolyl-tRNA synthetase [Source:HGNC Symbol;Acc:3418]|1|ENSG00000136628|ENST00000366923	12	26.9463	0.88146	40.1834	1.17191	1;5;3	1;5;3	15.0691	1.17598	1;5;3	15.81	3	13	59	3.29318e+07	81.3546	5.16	5	8	143.137	10.58	10	25	141.597	10.05	10	26	1512	170.483	7.32764
	ENSP00000353124	ARRB1 HGNC Symbol|arrestin, beta 1 [Source:HGNC Symbol;Acc:711]|ENSG00000137486|11|ENST00000360025	3	42.0662	0.673424	33.2761	1.17236	2;1;2	2;1;2	20.611	1.78622	2;1;2	13.41	5	3	15	9.89157e+06	43.19	13.41	3	4	25.37	13.41	3	6	34.01	13.41	3	5	410	46.2799	6.34131
	ENSP00000369897	CARS HGNC Symbol|cysteinyl-tRNA synthetase [Source:HGNC Symbol;Acc:1493]|11|ENSG00000110619|ENST00000380525	9		0.668647		1.17394	1;-;-	1;-;-		1.80463	1;-;-	16	8	12	27	8.14175e+06	77.65	9.39	7	7	80.4655	9.03	8	9	146.84	12.64	9	11	831	94.5778	6.82959
	ENSP00000283179	HNRNPU HGNC (curated)|Heterogeneous nuclear ribonucleoprotein U (hnRNP U)(Scaffold attachment factor A)(SAF-A)(p120)(pp120) [Source:UniProtKB/Swiss-Prot;Acc:Q00839]|1|ENSG00000153187|ENST00000283179	1	42.3726	1.0782	38.5762	1.17414	3;2;2	3;2;2	9.79821	1.08799	3;2;2	32.36	3	18	585	5.32811e+08	3720.46	32.36	18	212	3777.09	32.36	18	185	4031.21	29.58	17	188	825	90.528	5.99854
	ENSP00000364970	PSMC5 HGNC Symbol|proteasome (prosome, macropain) 26S subunit, ATPase, 5 [Source:HGNC Symbol;Acc:9552]|ENSG00000087191|17|ENST00000375812	12	20.0711	1.18162	13.6789	1.17481	6;5;5	6;5;5	15.304	0.996325	6;5;5	43.47	2	12	96	6.4924e+07	469.459	41.96	11	34	445.946	27.14	9	30	431.175	27.14	9	32	398	44.7557	8.17725
	ENSP00000216802	PSME2 HGNC (curated)|Proteasome activator complex subunit 2 (Proteasome activator 28 subunit beta)(PA28beta)(PA28b)(Activator of multicatalytic protease subunit 2)(11S regulator complex subunit beta)(REG-beta) [Source:UniProtKB/Swiss-Prot;Acc:Q9UL46]|14|ENSG00000100911|ENST00000216802	4		1.51735	12.5348	1.17492	-;1;1	-;1;1	29.2138	0.767291	-;1;1	17.57	4	4	9	1.39319e+07					95.07	11.3	3	4	99.21	17.57	4	5	239	27.3843	5.73193
	ENSP00000426446	HNRNPD HGNC Symbol|heterogeneous nuclear ribonucleoprotein D (AU-rich element RNA binding protein 1, 37kDa) [Source:HGNC Symbol;Acc:5036]|ENSG00000138668|4|ENST00000514671	3	28.834	1.20757	20.6435	1.17643	6;12;11	6;12;11	4.9707	1.00229	6;12;11	40	11	3	146	1.22357e+08	162.187	24.29	2	28	517.769	40	3	61	568.297	40	3	57	210	23.9062	9.5835
	ENSP00000376276	SRSF2 HGNC Symbol|serine/arginine-rich splicing factor 2 [Source:HGNC Symbol;Acc:10783]|ENSG00000161547|17|ENST00000392485	13	20.4368	1.1229	15.0336	1.17747	6;7;7	6;7;7	7.31843	1.04749	6;7;7	51.58	5	15	112	2.62565e+08	285.707	46.15	12	32	308.798	40.27	12	44	318.418	40.27	11	36	221	25.4612	11.854
	ENSP00000258962	SRSF1 HGNC Symbol|serine/arginine-rich splicing factor 1 [Source:HGNC Symbol;Acc:10780]|ENSG00000136450|17|ENST00000258962	17	23.3324	1.19363	17.0442	1.17847	8;14;11	8;14;11	7.85923	0.998726	8;14;11	62.9	1	19	158	2.29461e+08	407.513	62.9	17	34	724.934	54.84	17	63	690.17	54.44	17	61	248	27.7278	10.3599
	ENSP00000413121	SEC11A HGNC Symbol|SEC11 homolog A (S. cerevisiae) [Source:HGNC Symbol;Acc:17718]|ENSG00000140612|15|ENST00000455959	6	15.2564	0.89459	22.4767	1.17887	1;1;2	1;1;2	11.1739	1.29371	1;1;2	43.79	8	6	42	4.607e+07	132.653	22.88	3	6	238.733	43.79	6	25	239.175	43.79	5	11	153	17.3965	9.43701
	ENSP00000423718	H2AFY HGNC Symbol|H2A histone family, member Y [Source:HGNC Symbol;Acc:4740]|ENSG00000113648|5|ENST00000506671	4	38.4322	1.09874	31.0932	1.1793	20;19;20	20;19;20	7.268	1.07251	20;19;20	45.45	5	5	115	9.7827e+07	395.286	43.64	4	37	303.426	43.64	4	39	408.837	45.45	5	39	165	17.5639	10.6675
	ENSP00000398159	SRSF7 HGNC Symbol|serine/arginine-rich splicing factor 7 [Source:HGNC Symbol;Acc:10789]|ENSG00000115875|2|ENST00000431066	9	27.6692	1.1918	19.405	1.1813	4;3;2	4;3;2	6.44496	0.994713	4;3;2	81.82	6	10	51	1.91728e+08	353.388	75.76	8	16	307.577	62.88	8	17	402.589	81.82	10	18	132	15.2475	9.62744
	ENSP00000344149	SRSF10 HGNC Symbol|serine/arginine-rich splicing factor 10 [Source:HGNC Symbol;Acc:16713]|ENSG00000188529|1|ENST00000343255	9	21.2857	1.13864	15.7892	1.18159	1;2;3	1;2;3	11.4761	1.03447	1;2;3	41	8	11	42	1.66735e+08	56.5559	15.33	4	4	189.531	32.18	8	17	260.947	41	11	21	261	31.1948	11.2681
	ENSP00000317334	TCP1 HGNC (curated)|T-complex protein 1 subunit alpha (TCP-1-alpha)(CCT-alpha) [Source:UniProtKB/Swiss-Prot;Acc:P17987]|6|ENSG00000120438|ENST00000321394	11	29.7423	1.24568	30.8031	1.18171	9;10;8	9;10;8	13.3546	0.905067	9;10;8	26.26	8	11	120	6.59166e+07	575.278	23.38	10	35	721.017	26.26	11	42	715.85	23.38	10	43	556	60.3056	6.11279
	ENSP00000364811	IARS HGNC Symbol|isoleucyl-tRNA synthetase [Source:HGNC Symbol;Acc:5330]|9|ENSG00000196305|ENST00000375660	14	50.1927	0.969643	47.9565	1.18551	1;4;3	1;4;3	8.32003	1.21144	1;4;3	15.78	17	15	55	2.78107e+07	74.4345	5.56	7	14	154.864	8.45	10	22	189.386	9.98	10	19	1242	142.198	6.0874
	ENSP00000261758	MESDC2 HGNC Symbol|mesoderm development candidate 2 [Source:HGNC Symbol;Acc:13520]|ENSG00000117899|15|ENST00000261758	2		22.9247		1.1857	-;1;-	-;1;-		0.050074	-;1;-	5.56	1	2	4	8.87942e+06					23.73	5.56	2	2	30.38	5.56	2	2	234	26.0603	7.78174
	ENSP00000394863	PPT1 HGNC Symbol|palmitoyl-protein thioesterase 1 [Source:HGNC Symbol;Acc:9325]|ENSG00000131238|1|ENST00000433473	4		1.26847	20.8817	1.18595	-;2;1	-;2;1	1.5234	0.901636	-;2;1	23.53	5	4	17	2.31678e+07	30.36	7.84	1	1	139.64	23.53	4	8	145.75	23.53	4	8	306	34.1713	6.52197
	ENSP00000292644	PSMC2 HGNC Symbol|proteasome (prosome, macropain) 26S subunit, ATPase, 2 [Source:HGNC Symbol;Acc:9548]|ENSG00000161057|7|ENST00000292644	13	11.6534	1.14675	13.7665	1.18617	10;11;9	10;11;9	3.10354	0.965905	10;11;9	41.57	3	14	113	4.91814e+07	691.334	38.8	13	38	868.87	41.57	14	38	676.622	32.56	11	37	433	48.6031	5.94775
	ENSP00000362334	PSMB2 HGNC Symbol|proteasome (prosome, macropain) subunit, beta type, 2 [Source:HGNC Symbol;Acc:9539]|ENSG00000126067|1|ENST00000373237	8	23.4903	1.25443	25.5891	1.18622	1;2;4	1;2;4	7.97928	0.926264	1;2;4	38.81	2	8	45	7.07792e+07	93.4994	16.92	4	8	168.933	28.86	7	16	277.011	38.81	8	21	201	22.8217	7.02002
	ENSP00000327145	FLNC HGNC Symbol|filamin C, gamma [Source:HGNC Symbol;Acc:3756]|ENSG00000128591|7|ENST00000325888	37	46.2441	1.44683	35.8977	1.18722	6;29;20	6;29;20	17.8838	0.817848	6;29;20	22.68	2	39	289	1.30859e+08	1101.45	11.82	22	59	1986.25	19.89	35	121	1742.08	20.62	35	109	2725	290.841	5.97314
	ENSP00000221418	ECH1 HGNC Symbol|enoyl CoA hydratase 1, peroxisomal [Source:HGNC Symbol;Acc:3149]|ENSG00000104823|19|ENST00000221418	5		1.3968	0.836501	1.18844	-;3;1	-;3;1	6.69133	0.823512	-;3;1	21.34	1	6	10	2.46162e+07					109.71	21.34	6	7	21.12	10.67	3	3	328	35.7934	8.00146
	ENSP00000352019	CCT6A HGNC (curated)|T-complex protein 1 subunit zeta (TCP-1-zeta)(CCT-zeta)(CCT-zeta-1)(Tcp20)(HTR3)(Acute morphine dependence-related protein 2) [Source:UniProtKB/Swiss-Prot;Acc:P40227]|7|ENSG00000146731|ENST00000335503	13	32.6032	1.23346	31.1545	1.1891	18;19;23	18;19;23	13.8216	0.954616	18;19;23	41.77	7	14	194	6.62493e+07	447.861	40.33	13	56	595.486	41.77	14	61	675.571	40.33	13	77	486	53.2551	7.26904
	ENSP00000358283	KIAA0776 HGNC (curated)|UPF0555 protein KIAA0776 [Source:UniProtKB/Swiss-Prot;Acc:O94874]|6|ENSG00000014123|ENST00000369278	8	20.8027	0.748627	22.2704	1.18946	1;1;2	1;1;2	33.4247	1.63554	1;1;2	12.22	1	9	34	8.98466e+06	193.396	8.44	6	12	177.262	9.45	6	9	204.244	12.22	9	13	794	89.5398	6.78564
	ENSP00000244020	SRSF6 HGNC Symbol|serine/arginine-rich splicing factor 6 [Source:HGNC Symbol;Acc:10788]|ENSG00000124193|20|ENST00000244020	8	27.6587	1.18176	29.5264	1.19085	2;3;3	2;3;3	11.2653	1.00661	2;3;3	31.98	2	14	52	1.47423e+08	190.019	19.19	8	13	359.768	23.26	10	21	298.546	26.45	12	18	344	39.5634	11.4292
	ENSP00000265028	DNAJB11 HGNC Symbol|DnaJ (Hsp40) homolog, subfamily B, member 11 [Source:HGNC Symbol;Acc:14889]|ENSG00000090520|3|ENST00000265028	8	10.0737	1.24325	3.04641	1.19108	9;9;8	9;9;8	2.66598	0.938298	9;9;8	36.03	2	8	65	3.50123e+07	275.732	36.03	8	22	295.897	36.03	8	21	241.708	27.09	6	22	358	40.4886	6.17627
	ENSP00000364188	DDOST HGNC (curated)|Dolichyl-diphosphooligosaccharide--protein glycosyltransferase 48 kDa subunit Precursor (Oligosaccharyl transferase 48 kDa subunit)(DDOST 48 kDa subunit)(EC 2.4.1.119) [Source:UniProtKB/Swiss-Prot;Acc:P39656]|1|ENSG00000244038|ENST00000375048	7	11.5031	1.21639	2.01525	1.19132	4;4;3	4;4;3	14.4177	0.959869	4;4;3	17.32	6	7	88	9.17861e+07	468.471	17.32	7	29	359.648	17.32	7	32	379.987	17.32	7	27	456	50.769	6.55127
	ENSP00000264028	ARCN1 HGNC Symbol|archain 1 [Source:HGNC Symbol;Acc:649]|ENSG00000095139|11|ENST00000264028	5	29.6004	1.00339	31.4217	1.19137	7;6;8	7;6;8	6.91605	1.20208	7;6;8	8.02	4	7	57	2.3561e+07	269.836	6.65	5	16	277.002	6.65	6	17	375.133	8.02	6	24	511	57.1741	6.21436
	ENSP00000317159	CYC1 HGNC (automatic)|Cytochrome c1, heme protein, mitochondrial Precursor (Ubiquinol-cytochrome-c reductase complex cytochrome c1 subunit)(Cytochrome c-1)(Cytochrome b-c1 complex subunit 4)(Complex III subunit 4)(Complex III subunit IV) [Source:UniProtKB/Swiss-Prot;Acc:P08574]|8|ENSG00000179091|ENST00000318911	5		1.54819		1.19274	-;-;1	-;-;1		0.74268	-;-;1	16.92	1	5	13	1.5229e+07					110.53	14.46	4	6	117.756	16.92	5	7	325	35.399	8.99756
	ENSP00000364286	CAPZB HGNC Symbol|capping protein (actin filament) muscle Z-line, beta [Source:HGNC Symbol;Acc:1491]|ENSG00000077549|1|ENST00000375144	7	21.3768	1.011	19.0602	1.1933	17;15;24	17;15;24	13.3978	1.11164	17;15;24	41.92	8	7	104	4.31629e+07	373.996	39.62	6	28	551.48	31.92	5	31	780.194	41.92	7	45	260	29.2768	6.91748
	ENSP00000393525	IMPDH2 HGNC Symbol|IMP (inosine 5'-monophosphate) dehydrogenase 2 [Source:HGNC Symbol;Acc:6053]|ENSG00000178035|3|ENST00000429182	10	46.6168	1.49258	49.1359	1.19352	10;7;8	10;7;8	19.229	0.789451	10;7;8	30.21	13	10	58	2.39567e+07	137.48	30.21	10	18	158.823	22.13	8	16	213.815	30.21	10	24	470	51.0352	8.17725
	ENSP00000312042	HDLBP HGNC Symbol|high density lipoprotein binding protein [Source:HGNC Symbol;Acc:4857]|ENSG00000115677|2|ENST00000310931	37	9.65832	0.997298	10.4333	1.19379	47;55;50	47;55;50	5.356	1.11667	47;55;50	44.64	10	37	387	5.53778e+07	860.323	37.46	32	114	997.63	39.12	34	145	1177.72	40.38	33	128	1268	141.368	6.87354
	ENSP00000293406	LSM12 HGNC Symbol|LSM12 homolog (S. cerevisiae) [Source:HGNC Symbol;Acc:26407]|17|ENSG00000161654|ENST00000293406	2		1.02568	11.4686	1.19384	-;2;3	-;2;3	7.48213	1.07564	-;2;3	9.23	1	2	6	4.5219e+06					23.99	4.1	1	2	31.8833	9.23	2	4	195	21.6871	7.73779
	ENSP00000439575	SAFB HGNC Symbol|scaffold attachment factor B [Source:HGNC Symbol;Acc:10520]|ENSG00000160633|19|ENST00000540206	12	31.114	1.11695	34.0659	1.19472	1;7;4	1;7;4	10.4155	1.04298	1;7;4	34.98	9	26	180	3.99012e+07	149.052	15.02	15	27	331.909	33.25	24	76	336.307	31.4	22	77	812	91.1454	7.23975
	ENSP00000439243	MAP1S HGNC Symbol|microtubule-associated protein 1S [Source:HGNC Symbol;Acc:15715]|ENSG00000130479|19|ENST00000544059	5	28.8778	0.841457	12.0896	1.19514	1;1;3	1;1;3	17.7136	1.44665	1;1;3	9	3	7	23	4.38424e+06	40.6387	5.91	5	8	49.5832	4.16	4	4	125.204	7.26	6	11	1033	109.72	7.6499
	ENSP00000396548	FARSA HGNC (automatic)|Phenylalanyl-tRNA synthetase alpha chain (EC 6.1.1.20)(Phenylalanine--tRNA ligase alpha chain)(PheRS)(CML33) [Source:UniProtKB/Swiss-Prot;Acc:Q9Y285]|19|ENSG00000179115|ENST00000423140	12	24.9343	1.07428	34.8869	1.19943	4;6;5	4;6;5	9.73896	1.0923	4;6;5	44.23	9	14	87	3.2531e+08	106.996	25.79	8	20	203.941	44.03	13	32	325.185	38.36	13	35	477	54.1238	7.79639
	ENSP00000442864	ANXA7 HGNC Symbol|annexin A7 [Source:HGNC Symbol;Acc:545]|ENSG00000138279|10|ENST00000535178	13	15.7137	1.1069	7.52935	1.20027	5;2;4	5;2;4	10.2078	1.11724	5;2;4	50.89	4	14	96	3.41423e+07	611.491	41.07	12	37	426.026	37.5	10	26	492.725	35.71	9	33	336	37.7809	7.18115
	ENSP00000334373	KPNA4 HGNC Symbol|karyopherin alpha 4 (importin alpha 3) [Source:HGNC Symbol;Acc:6397]|ENSG00000186432|3|ENST00000334256	11	2.53485	0.936933	10.7736	1.20162	3;4;3	3;4;3	14.3228	1.17103	3;4;3	30.13	1	11	54	4.81849e+07	165.895	29.94	10	15	278.005	29.94	10	19	265.957	28.02	10	20	521	57.8506	4.95752
	ENSP00000354739	RPL12 HGNC Symbol|ribosomal protein L12 [Source:HGNC Symbol;Acc:10302]|ENSG00000197958|9|ENST00000361436	6	51.6958	0.995797	62.4922	1.20234	1;10;8	1;10;8	20.1458	1.10486	1;10;8	78.79	2	6	95	1.44423e+08	105.42	25.45	2	8	713.256	78.79	6	35	892.996	78.79	6	52	165	17.8075	9.42236
	ENSP00000216225	RBX1 HGNC Symbol|ring-box 1, E3 ubiquitin protein ligase [Source:HGNC Symbol;Acc:9928]|22|ENSG00000100387|ENST00000216225	4		1.02039		1.20382	-;-;2	-;-;2		1.13731	-;-;2	20.37	1	4	6	1.20357e+07					24.66	7.41	1	1	31.5033	20.37	4	5	108	12.2657	6.96143
	ENSP00000370232	IDH3B HGNC Symbol|isocitrate dehydrogenase 3 (NAD+) beta [Source:HGNC Symbol;Acc:5385]|ENSG00000101365|20|ENST00000380851	4		1.15729	2.15907	1.20431	-;1;1	-;1;1	20.1817	1.02371	-;1;1	16.19	3	4	12	1.04546e+07	25.59	4.18	1	1	59.5933	16.19	4	5	73.7067	16.19	4	6	383	41.8603	7.59131
	ENSP00000441518	CLPB HGNC Symbol|ClpB caseinolytic peptidase B homolog (E. coli) [Source:HGNC Symbol;Acc:30664]|ENSG00000162129|11|ENST00000538039	5		1.06771	16.0405	1.20583	-;1;1	-;1;1	29.6266	0.993181	-;2;1	12.7	18	8	29	9.21513e+07	54.59	6.5	5	8	45.6	8.42	6	12	40.74	9.6	6	9	677	75.4024	9.01221
	ENSP00000389219	GRSF1 HGNC Symbol|G-rich RNA sequence binding factor 1 [Source:HGNC Symbol;Acc:4610]|4|ENSG00000132463|ENST00000439371	3		1.43123		1.20611	-;-;1	-;-;1		0.812386	-;-;1	9.75	7	3	4	9.58023e+06					26.4	2.83	2	2	36.11	9.43	2	2	318	36.5902	5.69385
	ENSP00000390129	VDAC1 HGNC (curated)|Voltage-dependent anion-selective channel protein 1 (VDAC-1)(hVDAC1)(Outer mitochondrial membrane protein porin 1)(Plasmalemmal porin)(Porin 31HL)(Porin 31HM) [Source:UniProtKB/Swiss-Prot;Acc:P21796]|5|ENSG00000213585|ENST00000425992	2	24.8412	1.42618	6.64579	1.20693	3;3;5	3;3;5	18.3965	0.844633	3;3;5	25	2	2	84	2.32048e+08	421.857	25	2	14	254.587	25	2	22	376.57	25	2	48	184	20.3612	7.32764
	ENSP00000345341	PTGES2 HGNC Symbol|prostaglandin E synthase 2 [Source:HGNC Symbol;Acc:17822]|ENSG00000148334|9|ENST00000338961	5		1.09052	9.01953	1.20723	-;1;1	-;1;1	22.806	1.1088	-;1;1	22.02	4	5	12	3.19793e+07					93	22.02	5	5	119.36	17.51	4	7	377	41.9167	9.15869
	ENSP00000286953	C14orf2 HGNC (automatic)|6.8 kDa mitochondrial proteolipid [Source:UniProtKB/Swiss-Prot;Acc:P56378]|14|ENSG00000156411|ENST00000286953	1		1.55157	7.89841	1.20753	-;3;4	-;3;4	8.40389	0.761025	-;3;4	24.14	2	1	17	2.33986e+07					94.6267	24.14	1	8	115.85	24.14	1	9	58	6.65759	10.0815
	ENSP00000215071	PSMD8 HGNC Symbol|proteasome (prosome, macropain) 26S subunit, non-ATPase, 8 [Source:HGNC Symbol;Acc:9566]|19|ENSG00000099341|ENST00000215071	4		1.17878	20.5294	1.2078	-;1;1	-;1;1	21.8261	1.03738	-;1;1	17.71	1	5	11	2.21038e+07					42.64	7.71	2	4	101.597	12.86	4	7	350	39.5868	9.70068
	ENSP00000346120	DDX21 HGNC Symbol|DEAD (Asp-Glu-Ala-Asp) box polypeptide 21 [Source:HGNC Symbol;Acc:2744]|ENSG00000165732|10|ENST00000354185	10	38.6968	1.10603	35.6704	1.20789	4;4;2	4;4;2	5.23641	1.07611	4;4;2	18.39	4	13	57	4.40683e+07	355.218	17.5	11	20	295.453	10.47	8	20	353.689	10.73	8	17	783	87.2904	9.27588
	ENSP00000216190	EIF3D HGNC Symbol|eukaryotic translation initiation factor 3, subunit D [Source:HGNC Symbol;Acc:3278]|ENSG00000100353|22|ENST00000216190	13	20.2951	1.00981	23.8975	1.20895	5;11;18	5;11;18	5.50191	1.20605	5;11;18	36.5	9	14	104	4.72203e+07	328.22	25	10	27	382.972	30.84	12	35	420.034	30.84	12	42	548	63.9324	6.04932
	ENSP00000356348	PCMT1 HGNC Symbol|protein-L-isoaspartate (D-aspartate) O-methyltransferase [Source:HGNC Symbol;Acc:8728]|6|ENSG00000120265|ENST00000367378	2		1.22456	11.6962	1.21188	-;1;1	-;1;1	20.2343	0.964636	-;1;1	14.74	4	3	15	3.1971e+07					93.97	14.74	3	7	81.91	14.74	3	8	285	30.2956	7.51807
	ENSP00000439063	PODXL HGNC Symbol|podocalyxin-like [Source:HGNC Symbol;Acc:9171]|ENSG00000128567|7|ENST00000544955	3	33.5457	0.466948	58.6505	1.21243	6;5;1	6;5;1	30.7366	2.48989	6;5;1	14.53	5	3	32	5.03385e+07	90.5	14.53	3	8	122.03	14.53	3	17	65.76	8.72	2	7	516	54.3789	5.57959
	ENSP00000456638	RAB11A HGNC Symbol|RAB11A, member RAS oncogene family [Source:HGNC Symbol;Acc:9760]|15|ENSG00000103769|ENST00000565075	1		1.00126	9.02225	1.21289	-;1;2	-;1;2	2.0257	1.16931	-;1;2	32.83	8	6	29	5.17958e+07	23.7471	16.67	3	3	173.125	32.32	5	11	241.786	32.83	6	15	198	22.4725	7.44482
	ENSP00000346236	DDX46 HGNC Symbol|DEAD (Asp-Glu-Ala-Asp) box polypeptide 46 [Source:HGNC Symbol;Acc:18681]|ENSG00000145833|5|ENST00000354283	9	88.2891	1.89236		1.21347	1;-;2	1;-;2	30.1768	0.747397	1;-;2	12.51	3	11	43	4.45936e+07	130.38	8.92	8	16	71.13	6.4	6	11	164.58	10.38	10	16	1031	117.29	9.29053
	ENSP00000278823	MTA2 HGNC Symbol|metastasis associated 1 family, member 2 [Source:HGNC Symbol;Acc:7411]|ENSG00000149480|11|ENST00000278823	13	51.5381	0.992818	52.6468	1.21366	8;5;5	8;5;5	8.51948	1.22101	8;5;5	27.54	2	14	71	1.563e+07	431.53	25.75	13	30	188.33	19.01	9	21	308.399	20.96	10	20	668	74.9757	9.65674
	ENSP00000421288	ETF1 HGNC Symbol|eukaryotic translation termination factor 1 [Source:HGNC Symbol;Acc:3477]|ENSG00000120705|5|ENST00000499810	2	43.7224	1.26194	43.0757	1.21449	1;1;2	1;1;2	8.88608	0.958296	1;1;2	7.18	5	2	15	3.59858e+07	79.3333	7.18	2	5	80.5607	7.18	2	5	78.8933	7.18	2	5	404	45.4343	5.56689
	ENSP00000313644	MAP4K4 HGNC Symbol|mitogen-activated protein kinase kinase kinase kinase 4 [Source:HGNC Symbol;Acc:6866]|ENSG00000071054|2|ENST00000324219	10		1.05184	8.48403	1.21462	-;1;3	-;1;3	21.002	1.22692	-;1;3	15.45	19	18	74	2.39367e+08	113.457	7.88	8	18	76.4109	12.42	13	27	171.548	10.83	13	29	1320	150.991	7.57666
	ENSP00000290299	ATP5O HGNC Symbol|ATP synthase, H+ transporting, mitochondrial F1 complex, O subunit [Source:HGNC Symbol;Acc:850]|ENSG00000241837|21|ENST00000290299	6	13.8431	1.57424	7.36948	1.21565	9;7;9	9;7;9	15.01	0.766737	9;7;9	55.4	4	7	79	1.13361e+08	221.409	37.09	4	18	768.138	55.4	7	29	705.246	53.99	6	32	213	23.2627	9.96436
	ENSP00000339191	CAV1 HGNC Symbol|caveolin 1, caveolae protein, 22kDa [Source:HGNC Symbol;Acc:1527]|ENSG00000105974|7|ENST00000341049	4	17.9651	0.911827	16.9072	1.21611	3;4;4	3;4;4	23.5208	1.32869	3;4;4	48.31	3	4	43	1.07458e+08	209.836	48.31	4	16	350.911	48.31	4	15	258.165	34.27	3	12	178	20.4585	6.02393
	ENSP00000329419	COPB2 HGNC (automatic)|Coatomer subunit beta' (Beta'-coat protein)(Beta'-COP)(p102) [Source:UniProtKB/Swiss-Prot;Acc:P35606]|3|ENSG00000184432|ENST00000333188	12	14.9019	1.04895	11.6635	1.21612	2;5;4	2;5;4	4.2444	1.19542	2;5;4	14.46	9	13	100	9.41322e+07	144.37	10.82	10	27	328.632	14.46	13	39	283.171	12.58	12	34	906	102.422	5.2749
	ENSP00000380336	SMU1 HGNC Symbol|smu-1 suppressor of mec-8 and unc-52 homolog (C. elegans) [Source:HGNC Symbol;Acc:18247]|9|ENSG00000122692|ENST00000397149	6	31.9125	1.23481	30.3103	1.21682	1;4;3	1;4;3	2.97134	0.98463	1;4;3	16.96	2	7	29	3.97817e+07	91.3133	11.89	5	9	92.3814	15.79	6	11	85.0867	14.42	5	9	513	57.5072	7.18115
	ENSP00000252603	PGLS HGNC Symbol|6-phosphogluconolactonase [Source:HGNC Symbol;Acc:8903]|ENSG00000130313|19|ENST00000252603	7		0.931127		1.21721	-;-;1	-;-;1		1.26021	-;-;1	41.47	1	7	11	3.09193e+07					38.86	28.68	4	4	54.7967	41.47	7	7	258	27.5296	6.04932
	ENSP00000420515	FXR1 HGNC Symbol|fragile X mental retardation, autosomal homolog 1 [Source:HGNC Symbol;Acc:4023]|ENSG00000114416|3|ENST00000468861	5	19.6008	0.95615	20.2178	1.21875	4;5;6	4;5;6	11.6843	1.24285	4;5;6	16.3	15	7	70	3.05954e+07	209.986	12.11	6	22	285.681	16.3	7	25	328	11.45	5	23	454	50.9595	7.26904
	ENSP00000439970	NOMO2 HGNC Symbol|NODAL modulator 2 [Source:HGNC Symbol;Acc:22652]|16|ENSG00000185164|ENST00000543392	6	3.44344	1.22681		1.21896	2;-;1	2;-;1	19.7113	0.990386	2;-;1	10.73	10	7	24	1.97946e+07	131.86	6.73	5	8	99.9333	3.82	3	6	180.13	9.45	6	10	1100	121.985	5.79541
	ENSP00000416706	ACTBL2 HGNC (automatic)|Beta-actin-like protein 2 (Kappa-actin) [Source:UniProtKB/Swiss-Prot;Acc:Q562R1]|5|ENSG00000169067|ENST00000423391	3		1.28834	4.52255	1.21898	-;1;1	-;1;1	9.32586	0.916192	-;1;1	26.86	1	6	250	1.29316e+09	971.382	20.74	4	70	1067.42	26.86	6	92	581.16	17.02	5	88	376	41.976	5.59229
	ENSP00000247020	SDF2 HGNC Symbol|stromal cell-derived factor 2 [Source:HGNC Symbol;Acc:10675]|ENSG00000132581|17|ENST00000247020	4	27.3818	1.62594	8.74747	1.22055	1;2;2	1;2;2	30.133	0.780841	1;2;2	27.96	1	5	15	1.14665e+07	37.65	9.48	2	3	52.81	11.37	3	6	125.29	20.85	3	6	211	23.0114	7.32764
	ENSP00000251047	LMAN1 HGNC (curated)|Protein ERGIC-53 Precursor (ER-Golgi intermediate compartment 53 kDa protein)(Lectin mannose-binding 1)(Gp58)(Intracellular mannose-specific lectin MR60) [Source:UniProtKB/Swiss-Prot;Acc:P49257]|18|ENSG00000074695|ENST00000251047	13	10.5514	0.982442	6.40808	1.22342	14;16;17	14;16;17	7.32246	1.17636	14;16;17	35.49	1	13	132	4.10122e+07	516.129	26.67	10	40	500.048	29.02	12	45	573.995	35.29	12	47	510	57.513	6.771
	ENSP00000434355	DSTN HGNC Symbol|destrin (actin depolymerizing factor) [Source:HGNC Symbol;Acc:15750]|ENSG00000125868|20|ENST00000449141	3		1.16781	12.353	1.22392	-;3;5	-;3;5	17.3394	1.03315	-;3;5	24.44	3	3	23	4.0834e+07	22.69	8.15	1	2	223.511	24.44	3	9	288.82	24.44	3	12	135	15.3869	8.5874
	ENSP00000452939	TMOD3 HGNC Symbol|tropomodulin 3 (ubiquitous) [Source:HGNC Symbol;Acc:11873]|15|ENSG00000138594|ENST00000561438	1	8.07567	1.13002		1.22394	1;-;1	1;-;1	15.0512	1.08592	1;-;1	6.95	3	1	3	5.79303e+06	30.08	6.95	1	1					44.6	6.95	1	2	187	20.888	7.43018
	ENSP00000369682	MRPS26 HGNC Symbol|mitochondrial ribosomal protein S26 [Source:HGNC Symbol;Acc:14045]|ENSG00000125901|20|ENST00000380325	2		1.40352	5.92313	1.22417	-;1;1	-;1;1	5.32975	0.845021	-;1;1	8.29	1	2	5	3.42411e+06					50.18	8.29	2	3	40.17	8.29	2	2	205	24.1969	10.3892
	ENSP00000413502	RANBP1 HGNC Symbol|RAN binding protein 1 [Source:HGNC Symbol;Acc:9847]|ENSG00000099901|22|ENST00000418705	2		1.38057		1.22435	-;-;1	-;-;1		0.85493	-;-;1	20.69	7	3	3	5.15485e+08									24	20.69	3	3	145	16.8897	8.52881
	ENSP00000265395	HIBADH HGNC Symbol|3-hydroxyisobutyrate dehydrogenase [Source:HGNC Symbol;Acc:4907]|7|ENSG00000106049|ENST00000265395	1		1.12957	4.7327	1.22436	-;1;1	-;1;1	13.1757	1.0529	-;1;1	7.14	2	2	6	6.4324e+06					48.6567	7.14	2	4	30.81	7.14	2	2	336	35.3058	8.1333
	ENSP00000325875	HSP90AB1 HGNC (curated)|Heat shock protein HSP 90-beta (HSP 90)(HSP 84) [Source:UniProtKB/Swiss-Prot;Acc:P08238]|6|ENSG00000096384|ENST00000353801	17	34.1704	1.15746	30.6945	1.22518	43;47;50	43;47;50	16.8884	1.03051	43;47;50	48.9	10	23	874	6.77343e+08	4455.57	43.37	21	262	4796.81	48.9	22	303	5485.23	48.9	22	309	724	83.2121	5.03369
	ENSP00000386837	BZW1 HGNC Symbol|basic leucine zipper and W2 domains 1 [Source:HGNC Symbol;Acc:18380]|2|ENSG00000082153|ENST00000409226	3	37.617	1.0236	32.1683	1.22601	5;5;8	5;5;8	13.684	1.19938	5;5;8	11.58	10	4	30	3.1967e+07	70.56	6.38	3	8	45.22	11.58	4	8	54.1571	3.31	2	14	423	48.477	5.92236
	ENSP00000349259	SPTBN1 HGNC Symbol|spectrin, beta, non-erythrocytic 1 [Source:HGNC Symbol;Acc:11275]|ENSG00000115306|2|ENST00000356805	7	17.9099	0.886047	12.6613	1.22636	10;9;11	10;9;11	8.2464	1.48289	10;9;11	49.96	23	94	890	1.36914e+08	4158.38	44.12	79	283	4518.49	46.49	83	318	4815.84	47	84	289	2364	274.439	5.56689
	ENSP00000442900	SMARCA5 HGNC Symbol|SWI/SNF related, matrix associated, actin dependent regulator of chromatin, subfamily a, member 5 [Source:HGNC Symbol;Acc:11101]|4|ENSG00000153147|ENST00000535006	7	37.8039	1.07795		1.22892	1;-;1	1;-;1	1.06023	1.14204	1;-;1	14.37	2	14	62	2.8193e+07	358.193	13.67	13	23	326.541	11.76	11	21	226.725	10.85	10	18	995	116.71	8.33838
	ENSP00000342830	RDX HGNC (automatic)|Radixin [Source:UniProtKB/Swiss-Prot;Acc:P35241]|11|ENSG00000137710|ENST00000343115	10	30.7699	1.12908	10.9966	1.22993	6;4;4	6;4;4	20.0447	1.0787	6;4;4	36.19	9	21	512	3.70413e+08	1743.48	32.25	16	153	1854.93	28.47	16	178	2341.96	36.19	20	181	583	68.5214	6.3667
	ENSP00000332455	KPNA2 HGNC Symbol|karyopherin alpha 2 (RAG cohort 1, importin alpha 1) [Source:HGNC Symbol;Acc:6395]|ENSG00000182481|17|ENST00000330459	5		2.09353	25.7659	1.22994	-;1;1	-;1;1	6.52432	0.57328	-;1;1	19.09	2	7	15	3.04714e+07	81.88	11.53	4	4	114.51	13.04	4	5	63.07	14.93	5	6	529	57.8259	5.40186
	ENSP00000257497	ANXA1 HGNC (curated)|Annexin A1 (Annexin-1)(Annexin I)(Lipocortin I)(Calpactin II)(Chromobindin-9)(p35)(Phospholipase A2 inhibitory protein) [Source:UniProtKB/Swiss-Prot;Acc:P04083]|9|ENSG00000135046|ENST00000257497	13	11.9785	1.00506	6.8867	1.23008	44;51;51	44;51;50	7.28378	1.2141	44;51;50	33.82	2	14	495	4.62163e+08	2816.65	33.82	13	141	3345.35	33.82	14	179	3362.21	33.82	14	175	346	38.69	7.02002
	ENSP00000380414	DEK HGNC Symbol|DEK oncogene [Source:HGNC Symbol;Acc:2768]|ENSG00000124795|6|ENST00000397239	8	31.008	1.02286	20.4051	1.23026	5;8;10	5;8;10	8.22731	1.20413	5;8;10	31.2	6	8	54	4.55228e+07	220.047	16	5	11	311.083	31.2	8	22	295.411	23.2	7	21	375	42.6479	8.55811
	ENSP00000295770	STT3B HGNC (curated)|Dolichyl-diphosphooligosaccharide--protein glycosyltransferase subunit STT3B (Oligosaccharyl transferase subunit STT3B)(STT3-B)(EC 2.4.1.119)(Source of immunodominant MHC-associated peptides homolog) [Source:UniProtKB/Swiss-Prot;Acc:Q8TCJ2]|3|ENSG00000163527|ENST00000295770	6	29.57	0.962393	36.7193	1.23074	1;1;3	1;1;3	13.379	1.18868	1;1;3	12.23	1	8	20	2.51229e+07	37.33	3.63	3	3	70.95	9.08	5	11	62.91	7.38	5	6	826	93.6137	8.90967
	ENSP00000348108	KHDRBS3 HGNC Symbol|KH domain containing, RNA binding, signal transduction associated 3 [Source:HGNC Symbol;Acc:18117]|ENSG00000131773|8|ENST00000355849	1		1.53527		1.23078	-;-;1	-;-;1		0.772825	-;-;1	6.36	6	3	48	1.66602e+08	87.3409	4.34	2	13	150.936	6.36	3	18	134.491	6.36	3	17	346	38.7756	7.60596
	ENSP00000252725	ARPC1B HGNC Symbol|actin related protein 2/3 complex, subunit 1B, 41kDa [Source:HGNC Symbol;Acc:704]|ENSG00000130429|7|ENST00000252725	3	12.5178	0.950624	15.2038	1.23182	3;5;3	3;5;3	4.2912	1.22227	3;5;3	16.94	8	5	31	2.989e+07	99.13	16.13	4	8	132.402	16.94	5	12	163.22	16.13	4	11	372	40.9234	8.35303
	ENSP00000307212	POLR1C HGNC Symbol|polymerase (RNA) I polypeptide C, 30kDa [Source:HGNC Symbol;Acc:20194]|ENSG00000171453|6|ENST00000304004	5		1.10273		1.23194	-;1;-	-;1;-		1.08159	-;1;-	20.18	6	5	8	1.28096e+07					58.2867	20.18	5	5	45.87	10.82	3	3	342	38.6226	6.01123
	ENSP00000305503	NUP62 HGNC Symbol|nucleoporin 62kDa [Source:HGNC Symbol;Acc:8066]|ENSG00000213024|19|ENST00000352066	3		1.25503		1.23316	-;-;2	-;-;2		0.947218	-;-;2	7.09	1	3	3	9.98025e+06									59.32	7.09	3	3	522	53.2225	5.31299
	ENSP00000366672	DTD1 HGNC Symbol|D-tyrosyl-tRNA deacylase 1 homolog (S. cerevisiae) [Source:HGNC Symbol;Acc:16219]|ENSG00000125821|20|ENST00000377452	3		1.11998	4.35824	1.23317	-;1;1	-;1;1	24.6232	1.10334	-;1;1	22.97	1	4	11	1.53629e+07					130.88	22.97	4	5	136.41	22.97	4	6	209	23.409	8.23584
	ENSP00000377642	RAB1B HGNC Symbol|RAB1B, member RAS oncogene family [Source:HGNC Symbol;Acc:18370]|11|ENSG00000174903|ENST00000394080	2	23.1426	1.32631	2.98994	1.23338	2;2;3	2;2;3	23.0418	1.01241	2;2;3	24.37	5	2	20	2.87868e+07	52.51	24.37	2	6	111.47	24.37	2	5	109.38	24.37	2	9	119	13.708	5.07178
	ENSP00000362900	SRSF4 HGNC Symbol|serine/arginine-rich splicing factor 4 [Source:HGNC Symbol;Acc:10786]|ENSG00000116350|1|ENST00000373795	5	27.9623	1.13681	24.1652	1.23487	3;4;3	3;4;3	8.60101	1.08215	3;4;3	19.84	3	10	49	1.35244e+08	249.28	14.98	8	13	323.02	18.42	9	19	315.424	16.8	8	17	494	56.6453	11.5171
	ENSP00000371441	MCM5 HGNC Symbol|minichromosome maintenance complex component 5 [Source:HGNC Symbol;Acc:6948]|22|ENSG00000100297|ENST00000382011	7	8.28309	1.04691	0.325165	1.23604	1;1;-	1;1;-		1.18022	1;1;-	11.72	8	8	27	1.85929e+07	52.88	2.89	3	4	87.3964	9.41	7	12	31.3367	9.84	7	11	691	77.5437	8.60205
	ENSP00000354947	CAPZA2 HGNC Symbol|capping protein (actin filament) muscle Z-line, alpha 2 [Source:HGNC Symbol;Acc:1490]|ENSG00000198898|7|ENST00000361183	3		1.17	11.3196	1.23615	-;1;2	-;1;2	26.5115	1.04225	-;1;2	19.58	4	6	35	6.42525e+07	185.525	5.94	2	7	217.546	16.43	4	13	251.751	19.58	6	15	286	32.9286	5.84619
	ENSP00000361206	MRPS18A HGNC Symbol|mitochondrial ribosomal protein S18A [Source:HGNC Symbol;Acc:14515]|ENSG00000096080|6|ENST00000372133	2		1.56348	2.08213	1.23675	-;2;1	-;2;1	14.5574	0.773353	-;2;1	20.92	4	4	12	2.37303e+07					41.99	20.92	4	6	27.59	20.92	4	6	196	22.1698	10.3306
	ENSP00000361626	YBX1 HGNC (curated)|Nuclease-sensitive element-binding protein 1 (Y-box-binding protein 1)(Y-box transcription factor)(YB-1)(CCAAT-binding transcription factor I subunit A)(CBF-A)(Enhancer factor I subunit A)(EFI-A)(DNA-binding protein B)(DBPB) [Source:UniProtKB/Swiss-Prot;Acc:P67809]|1|ENSG00000065978|ENST00000321358	7		1.15492	11.8013	1.23768	-;8;4	-;8;4	10.9814	0.980638	-;8;4	59.57	5	10	133	6.00325e+07	224.797	9.26	1	6	1040.85	59.26	9	67	1158.82	59.57	10	60	324	35.9027	9.87646
	ENSP00000252599	GLT25D1 HGNC Symbol|glycosyltransferase 25 domain containing 1 [Source:HGNC Symbol;Acc:26182]|ENSG00000130309|19|ENST00000252599	17	23.0949	1.22424	24.9489	1.23965	8;6;4	8;6;4	7.86451	1.07374	8;6;4	37.62	2	18	103	6.55193e+07	466.074	31.83	16	40	342.798	21.7	13	33	476.44	22.19	12	30	622	71.5905	7.31299
	ENSP00000399323	GSN HGNC Symbol|gelsolin [Source:HGNC Symbol;Acc:4620]|ENSG00000148180|9|ENST00000456109	13	29.2445	0.899857	49.4741	1.24067	28;25;33	28;25;33	25.0211	1.30319	28;25;33	34.75	14	13	218	5.5746e+07	738.299	34.75	13	77	594.203	29.79	12	63	839.23	29.5	11	78	705	77.7111	5.69385
	ENSP00000348442	PSMD12 HGNC Symbol|proteasome (prosome, macropain) 26S subunit, non-ATPase, 12 [Source:HGNC Symbol;Acc:9557]|17|ENSG00000197170|ENST00000356126	6	22.014	1.11367	10.7979	1.24162	1;2;1	1;2;1	16.613	1.12279	1;2;1	19.74	2	8	18	3.87863e+07	91.97	9.65	3	4	146.83	15.13	6	7	122.523	16.23	6	7	456	52.8706	7.6499
	ENSP00000394375	FLOT1 HGNC Symbol|flotillin 1 [Source:HGNC Symbol;Acc:3757]|ENSG00000137312|6|ENST00000456573	12	44.3959	0.75009	39.322	1.24293	15;9;12	15;9;12	2.34515	1.57534	15;9;12	35.62	22	14	143	3.49316e+07	690.917	35.62	13	49	783.042	32.19	12	46	728.84	29.02	12	48	379	42.054	8.1626
	ENSP00000448452	CBX5 HGNC Symbol|chromobox homolog 5 [Source:HGNC Symbol;Acc:1555]|12|ENSG00000094916|ENST00000550489	2		1.00485	1.02898	1.24633	-;1;2	-;1;2	21.6652	1.22529	-;1;2	13.16	3	2	4	4.59383e+06					33.76	4.21	1	1	73.0133	13.16	2	3	190	22.083	5.85889
	ENSP00000434767	STIM1 HGNC Symbol|stromal interaction molecule 1 [Source:HGNC Symbol;Acc:11386]|ENSG00000167323|11|ENST00000533977	4	30.0195	1.04355	44.8317	1.2497	2;1;-	2;1;-		1.17126	2;1;-	13.09	4	6	25	5.24979e+06	55.38	10.74	5	8	52.63	7.23	4	9	45.5133	6.84	3	8	512	57.5847	8.30908
	ENSP00000318176	PRKRA HGNC Symbol|protein kinase, interferon-inducible double stranded RNA dependent activator [Source:HGNC Symbol;Acc:9438]|ENSG00000180228|2|ENST00000325748	5		1.42876		1.2497	-;-;1	-;-;1		0.843198	-;-;1	18.53	7	5	9	1.02893e+07					26.87	9.58	3	3	38.1	18.53	5	6	313	34.3825	8.41162
	ENSP00000360286	RAE1 HGNC Symbol|RAE1 RNA export 1 homolog (S. pombe) [Source:HGNC Symbol;Acc:9828]|ENSG00000101146|20|ENST00000371242	2		1.16715		1.24986	-;-;1	-;-;1		1.03233	-;-;1	6.79	3	2	10	1.84556e+07	30.28	4.08	1	3	19.26	4.08	1	2	33.72	6.79	2	5	368	40.9419	7.82568
	ENSP00000445783	EIF3C HGNC Symbol|eukaryotic translation initiation factor 3, subunit C [Source:HGNC Symbol;Acc:3279]|ENSG00000184110|16|ENST00000537985	21	19.8741	0.978252	26.369	1.25096	17;20;32	17;20;32	2.31928	1.24815	17;20;32	30.51	12	22	209	3.74358e+07	858.747	23.39	17	61	829.982	25.5	19	65	1267.2	28.4	21	83	898	103.58	5.52881
	ENSP00000424053	PAICS HGNC Symbol|phosphoribosylaminoimidazole carboxylase, phosphoribosylaminoimidazole succinocarboxamide synthetase [Source:HGNC Symbol;Acc:8587]|4|ENSG00000128050|ENST00000505164	7	54.882	1.76608	61.1909	1.25203	7;5;7	7;5;7	24.2944	0.694849	7;5;7	28.09	4	8	33	1.43799e+07	107.67	25.67	7	10	48.1957	13.08	4	10	138.959	17.92	5	13	413	45.6224	6.68311
	ENSP00000405574	TBL1XR1 HGNC Symbol|transducin (beta)-like 1 X-linked receptor 1 [Source:HGNC Symbol;Acc:29529]|3|ENSG00000177565|ENST00000430069	3		1.2193		1.25346	1;-;-	1;-;-		1.05667	1;-;-	13.62	6	3	6	1.20305e+07	79.2367	13.62	3	4	55.31	5.45	1	1	46.65	5.45	1	1	514	55.5601	5.5542
	ENSP00000393953	PNPT1 HGNC Symbol|polyribonucleotide nucleotidyltransferase 1 [Source:HGNC Symbol;Acc:23166]|ENSG00000138035|2|ENST00000415374	6	69.9869	1.68972	46.4501	1.25393	2;2;1	2;2;1	21.899	0.809316	2;2;1	11.24	5	8	31	3.36272e+07	162.35	8.05	6	9	267.2	11.24	8	13	144.31	7.66	5	9	783	85.8966	7.76709
	ENSP00000362031	MRPS16 HGNC Symbol|mitochondrial ribosomal protein S16 [Source:HGNC Symbol;Acc:14048]|10|ENSG00000182180|ENST00000372940	2		1.6458	20.6194	1.25404	-;2;1	-;2;1	32.4778	0.802499	-;2;1	17.17	3	2	5	2.80003e+06					0	17.17	2	3	32.7831	17.17	2	2	99	11.1429	9.68604
	ENSP00000438051	FSTL1 HGNC Symbol|follistatin-like 1 [Source:HGNC Symbol;Acc:3972]|ENSG00000163430|3|ENST00000539471	1		0.780141		1.25438	-;1;-	-;1;-		1.55668	-;1;-	6.77	3	1	2	4.56692e+06					24.73	6.77	1	2					251	28.3946	4.94482
	ENSP00000379342	ANXA2 HGNC (curated)|Annexin A2 (Annexin-2)(Annexin II)(Lipocortin II)(Calpactin I heavy chain)(Chromobindin-8)(p36)(Protein I)(Placental anticoagulant protein IV)(PAP-IV) [Source:UniProtKB/Swiss-Prot;Acc:P07355]|15|ENSG00000182718|ENST00000396024	11	11.4437	1.08732	6.71661	1.25507	47;64;59	47;65;61	5.232	1.12875	47;64;59	82.89	20	24	1734	2.89154e+09	7394.61	82.89	20	459	9593.31	82.89	23	633	9601.38	82.89	24	642	339	38.5798	7.75244
	ENSP00000299564	CDYL2 HGNC Symbol|chromodomain protein, Y-like 2 [Source:HGNC Symbol;Acc:23030]|16|ENSG00000166446|ENST00000299564	2	73.6151	1.51403	55.4823	1.25557	1;1;-	1;1;-		0.899053	1;1;-	5.73	2	4	6	1.62253e+06	27.51	3.36	2	3	33.12	4.35	3	3					506	56.4648	8.79248
	ENSP00000308610	GPD2 HGNC (curated)|Glycerol-3-phosphate dehydrogenase, mitochondrial Precursor (GPDH-M)(GPD-M)(EC 1.1.5.3)(mtGPD) [Source:UniProtKB/Swiss-Prot;Acc:P43304]|2|ENSG00000115159|ENST00000310454	13	31.9961	1.1315	21.0745	1.25653	8;6;3	8;6;3	4.85017	1.06176	8;6;3	24.62	4	14	66	2.06132e+07	484.974	16.23	10	26	294.531	18.98	10	20	334.177	14.31	9	20	727	80.8016	7.69385
	ENSP00000360021	GNG12 HGNC (curated)|Guanine nucleotide-binding protein G(I)/G(S)/G(O) subunit gamma-12 Precursor [Source:UniProtKB/Swiss-Prot;Acc:Q9UBI6]|1|ENSG00000172380|ENST00000370982	2		1.70373		1.25915	-;-;1	-;-;1		0.712459	-;-;1	47.22	1	2	3	3.08841e+06					67.95	20.83	1	1	55.96	47.22	2	2	72	8.00117	8.96826
	ENSP00000249760	IVD HGNC Symbol|isovaleryl-CoA dehydrogenase [Source:HGNC Symbol;Acc:6186]|ENSG00000128928|15|ENST00000249760	3		1.18289		1.2604	-;-;1	-;-;1		1.02719	-;-;1	16.78	6	3	4	2.81916e+07									31.6433	16.78	3	4	423	46.2896	8.19189
	ENSP00000216297	SUPT16H HGNC (curated)|FACT complex subunit SPT16 (Facilitates chromatin transcription complex subunit SPT16)(hSPT16)(FACT 140 kDa subunit)(FACTp140)(Chromatin-specific transcription elongation factor 140 kDa subunit) [Source:UniProtKB/Swiss-Prot;Acc:Q9Y5B9]|14|ENSG00000092201|ENST00000216297	13	12.7825	1.15703	4.99827	1.26336	8;7;6	8;7;6	9.59894	1.06422	8;7;6	16.33	2	14	69	2.86104e+07	216.611	13.37	12	27	254.561	10.6	10	23	214.651	9.55	9	19	1047	119.838	5.65576
	ENSP00000359058	SLC25A24 HGNC Symbol|solute carrier family 25 (mitochondrial carrier; phosphate carrier), member 24 [Source:HGNC Symbol;Acc:20662]|ENSG00000085491|1|ENST00000370041	5	18.9944	1.04154	8.96174	1.26645	3;3;3	3;3;3	10.8282	1.14506	3;3;3	13.54	2	5	30	3.57345e+07	222.845	9.17	4	11	182.21	13.54	5	9	177.26	11.79	4	10	458	51.3212	5.88428
	ENSP00000376016	EZR HGNC Symbol|ezrin [Source:HGNC Symbol;Acc:12691]|ENSG00000092820|6|ENST00000392177	12	30.3851	1.03805	20.3776	1.26653	13;15;20	13;15;20	15.1977	1.2245	13;15;20	36.46	2	21	511	2.89991e+08	1452.97	30.87	17	148	1627.89	35.38	20	180	1941.97	33.21	19	183	554	65.5386	5.90967
	ENSP00000219313	PSMD7 HGNC Symbol|proteasome (prosome, macropain) 26S subunit, non-ATPase, 7 [Source:HGNC Symbol;Acc:9565]|ENSG00000103035|16|ENST00000219313	3	10.5791	1.17879	6.71328	1.26666	3;3;3	3;3;3	0.474028	0.980763	3;3;3	14.2	4	3	15	9.39031e+06	52.24	14.2	3	3	139.95	6.79	2	6	125.96	6.79	2	6	324	37.0025	6.771
	ENSP00000265563	PRKAR2A HGNC Symbol|protein kinase, cAMP-dependent, regulatory, type II, alpha [Source:HGNC Symbol;Acc:9391]|ENSG00000114302|3|ENST00000265563	8	27.43	1.38822	31.9084	1.26832	6;6;5	6;6;5	3.06611	0.923346	6;6;5	36.14	6	11	53	2.12976e+07	198.513	32.43	9	14	233.132	32.67	10	20	158.576	36.14	11	19	404	45.49	5.07178
	ENSP00000295901	PSMD6 HGNC Symbol|proteasome (prosome, macropain) 26S subunit, non-ATPase, 6 [Source:HGNC Symbol;Acc:9564]|3|ENSG00000163636|ENST00000295901	5	14.904	1.26983	13.1993	1.26882	2;3;2	2;3;2	13.5453	0.971535	2;3;2	16.45	15	6	36	3.30695e+07	110.789	11.83	5	11	122.262	16.45	6	12	83.4662	11.83	5	13	389	45.5023	5.61768
	ENSP00000406881	SHMT2 HGNC Symbol|serine hydroxymethyltransferase 2 (mitochondrial) [Source:HGNC Symbol;Acc:10852]|ENSG00000182199|12|ENST00000414700	21	20.0224	1.1403	26.747	1.26899	13;13;11	13;13;11	8.14218	1.1159	13;13;11	63.56	17	21	199	7.81752e+07	1030.49	58.39	18	69	1078.33	63.56	21	70	1111.12	48.45	17	60	483	53.4214	8.14795
	ENSP00000317232	FKBP10 HGNC Symbol|FK506 binding protein 10, 65 kDa [Source:HGNC Symbol;Acc:18169]|ENSG00000141756|17|ENST00000321562	9		1.33863	0.415417	1.27142	-;1;1	-;1;1	9.22655	0.921445	-;1;1	17.53	6	9	51	2.018e+07	87.9078	7.04	5	6	261.025	17.53	9	18	444.665	17.53	9	27	582	64.2042	5.61768
	ENSP00000378349	RCN2 HGNC Symbol|reticulocalbin 2, EF-hand calcium binding domain [Source:HGNC Symbol;Acc:9935]|ENSG00000117906|15|ENST00000394885	2		1.28714	9.41407	1.27155	-;1;1	-;1;1	9.04828	0.954216	-;1;1	8.83	3	2	6	1.782e+07	74.79	8.83	2	2	107.38	8.83	2	2	110.75	8.83	2	2	317	36.8536	4.39893
	ENSP00000223321	PSMA2 HGNC Symbol|proteasome (prosome, macropain) subunit, alpha type, 2 [Source:HGNC Symbol;Acc:9531]|ENSG00000106588|7|ENST00000223321	3		1.29978	5.97743	1.27493	-;2;3	-;2;3	9.24077	0.931562	-;2;3	18.38	2	3	17	3.20921e+07					63.13	12.39	2	6	51.66	18.38	3	11	234	25.8823	7.43018
	ENSP00000254636	IMMT HGNC (curated)|Mitochondrial inner membrane protein (Mitofilin)(p87/89)(Cell proliferation-inducing gene 4 protein) [Source:UniProtKB/Swiss-Prot;Acc:Q16891]|2|ENSG00000132305|ENST00000254636	24	16.7626	1.07087	16.5168	1.27496	26;26;25	26;26;25	5.88966	1.14589	26;26;25	39.76	13	24	238	4.4546e+07	1188.02	34.45	22	82	928.54	26.71	18	79	955.332	33.38	20	77	659	73.209	6.07471
	ENSP00000225426	PSMB3 HGNC (curated)|Proteasome subunit beta type-3 (EC 3.4.25.1)(Proteasome theta chain)(Proteasome chain 13)(Proteasome component C10-II) [Source:UniProtKB/Swiss-Prot;Acc:P49720]|17|ENSG00000108294|ENST00000225426	2		1.26112	7.59886	1.275	-;2;2	-;2;2	22.8716	0.99446	-;2;2	16.1	1	3	23	3.02977e+07	271.671	8.78	1	5	181.579	16.1	3	7	318.021	16.1	3	11	205	22.9335	6.55127
	ENSP00000296577	ABCE1 HGNC Symbol|ATP-binding cassette, sub-family E (OABP), member 1 [Source:HGNC Symbol;Acc:69]|ENSG00000164163|4|ENST00000296577	8	38.8082	1.14278	44.3956	1.27507	6;7;7	6;7;7	15.4813	1.05964	6;7;7	25.38	3	11	69	2.57252e+07	176.06	16.69	8	21	138.092	22.37	9	22	269.333	23.54	10	26	599	67.271	8.33838
	ENSP00000253457	COX4NB HGNC Symbol|COX4 neighbor [Source:HGNC Symbol;Acc:7864]|ENSG00000131148|16|ENST00000253457	2		1.2726	23.6699	1.27525	-;1;1	-;1;1	7.20423	0.962099	-;1;1	11.9	2	2	6	1.57109e+07					123.57	11.9	2	4	72.19	11.9	2	2	210	23.7577	6.40479
	ENSP00000248553	HSPB1 HGNC (curated)|Heat shock protein beta-1 (HspB1)(Heat shock 27 kDa protein)(HSP 27)(Stress-responsive protein 27)(SRP27)(Estrogen-regulated 24 kDa protein)(28 kDa heat shock protein) [Source:UniProtKB/Swiss-Prot;Acc:P04792]|7|ENSG00000106211|ENST00000248553	13		1.37825	5.46061	1.27657	-;4;11	-;4;11	15.53	0.926749	-;4;11	70.73	4	13	148	2.24245e+08	255.043	39.02	5	14	1077.17	70.73	13	57	1442.2	70.73	13	77	205	22.7685	6.40479
	ENSP00000229390	SRSF9 HGNC Symbol|serine/arginine-rich splicing factor 9 [Source:HGNC Symbol;Acc:10791]|ENSG00000111786|12|ENST00000229390	8		1.32608	0.764169	1.27785	-;4;5	-;4;5	18.019	0.966211	-;4;5	40.72	2	11	73	7.90024e+07	30.1519	7.24	3	6	293.371	36.65	9	32	295.231	36.65	10	35	221	25.5264	8.646
	ENSP00000348578	G3BP1 HGNC Symbol|GTPase activating protein (SH3 domain) binding protein 1 [Source:HGNC Symbol;Acc:30292]|ENSG00000145907|5|ENST00000356245	6	23.7048	1.0106	21.8234	1.27824	4;7;6	4;7;6	9.24123	1.27838	4;7;6	27.9	10	8	90	3.20481e+07	272.974	13.3	5	19	442.13	26.39	7	32	646.276	27.9	8	39	466	52.1321	5.51611
	ENSP00000226522	LAMTOR3 HGNC Symbol|late endosomal/lysosomal adaptor, MAPK and MTOR activator 3 [Source:HGNC Symbol;Acc:15606]|ENSG00000109270|4|ENST00000226522	1		1.2453		1.279	-;-;1	-;-;1		0.9901	-;-;1	17.09	2	1	2	2.25958e+07									68.49	17.09	1	2	117	12.9329	8.1333
	ENSP00000261712	PSMD11 HGNC Symbol|proteasome (prosome, macropain) 26S subunit, non-ATPase, 11 [Source:HGNC Symbol;Acc:9556]|ENSG00000108671|17|ENST00000261712	9	16.4081	1.25777	14.8365	1.27928	8;5;4	8;5;4	7.69483	0.992613	8;5;4	26.07	2	10	61	4.20812e+07	233.143	26.07	10	28	261.483	23.46	8	16	173.99	18.96	7	17	422	47.434	6.48096
[truncated: 1,496 more rows]

## Sheet: S4
	Table S4. All identified peptides from both dose rates, week 10, are shown.
[truncated: 35,547 more rows]

[truncated: 2 more sheets: S5, S6]
